# Supplementary material for: Past and present giant viruses diversity explored through permafrost metagenomics
Source: Research Square preprint supplement (doi:10.21203/rs.3.rs-1328080/v1), 2022-02-10
Supplement: Supplementary file 2 [file cb998b7a9689b79119d7343c.xlsx]

## Sheet: TS1
Table S1. Analyzed permafrost datasets
Cryosol type	Sample code	Locality	Type	Depth (m)	Dating (103 y)	Million reads	Dataset accession
Kamchatka (surface)	C	Kronotsky river bank	Vegetation-free soil	0	0	677	ERS7649018
	D	Kizimen volcano	Tundra soil	0	0	642	ERS7649019
	E	Shapina river bank	Vegetation-free soil	0	0	685	ERS7649020
Permafrost (Yukechi Alas area)	L	Under dry Alas	Core	12	28	645	ERS7649022
	N	Under dry Alas	Core	16	45	675	ERS7649024
	R	Under dry Alas	Core	19	42	628	ERS7649028
	P	Dry Yedoma	Core	11	36	616	ERS7649026
	K	Dry Yedoma	Core	16	49	569	ERS7649021
	Q	Under lake (4.5m water)	Core	6	0.053	635	ERS7649027
	M	Under lake (4.5m water)	Core	16	48.5	649	ERS7649023
	O	Under lake (4.5m water)	Core	19	40	586	ERS7649025

## Sheet: TS2
Table S2. Assembly statistics of all datasets combined
	Contigs over 1 kb			Contigs over 10 kb
	Total assembled nt	Contigs	Mean (median) length	Total assembled nt	Contigs	Mean (median) length
1st assembly round	1.97E-10	8,698,362	2,265 (1,473)	3.14E9	149.459	20,983 (14,660)
2nd assembly round	1.21E-10	2,720,241	4,432 (2,448)	4.51E9	185.996	24,274 (15,607)
P-value Wilcoxon test (2nd vs 1st assemblies)			<2.2E-16			<2.2E-16

## Sheet: TS3
Table S3. Nucleocytoviricota core genes
	Used for phylogenies		Hydrivirus alas	Stamnovirus alas	Krossosvirus alas	Pelikevirus alas	Marosvirus alas	Pleistovirus alas	Staryvirus yedoma	Yakutskivirus alas
DNA polymerase family B	X		X	X	X	X	X	X	X
mRNA capping enzyme			X	X	X	X	X	X	X	X
DNA-directed RNA polymerase subunit RPB1	X		X	X	X	X	X	X		X
DNA-directed RNA polymerase subunit RPB2	X		X	X	X	X	X	X
Cap-specific mRNA (nucleoside-2-O-)-methyltransferase			X	X	X	X
D5 DNA Primase	X		X	X	X	X	X	X
A18 transcript termination helicase			X	X	X
Poxvirus Late Transcription Factor VLTF3 like	X		X	X	X	X	X	X		X
Thymidine kinase			X	X	X	X			X	X
Patatin phospholipase			X		X		X	X	X	X
VV A32-like packaging ATPase	X						X	X	X	X
Divergent major capsid protein			X	X	X
Large eukaryotic DNA virus major capsid protein	X						X	X		X
DNA topoisomerase 2			X	X	X	X	X	X		X
Thioredoxin			X	X			X			X

## Sheet: TS4
Table S4. Control dataset composition
Group	File	Nucleotide accession	Name	Start	Stop
Nucleocytoviricota	Acanthamoeba_castellanii_mamavirus.fasta	JF801956.1	Acanthamoeba_castellanii_mamavirus	1	14206
Nucleocytoviricota	Acanthamoeba_castellanii_mamavirus.fasta	JF801956.1	Acanthamoeba_castellanii_mamavirus	35635	62484
Nucleocytoviricota	Acanthamoeba_castellanii_mamavirus.fasta	JF801956.1	Acanthamoeba_castellanii_mamavirus	83913	100834
Nucleocytoviricota	Acanthamoeba_castellanii_mamavirus.fasta	JF801956.1	Acanthamoeba_castellanii_mamavirus	122263	135700
Nucleocytoviricota	Acanthamoeba_castellanii_mamavirus.fasta	JF801956.1	Acanthamoeba_castellanii_mamavirus	157129	176544
Nucleocytoviricota	Acanthamoeba_castellanii_mamavirus.fasta	JF801956.1	Acanthamoeba_castellanii_mamavirus	197973	212642
Nucleocytoviricota	Acanthamoeba_castellanii_mamavirus.fasta	JF801956.1	Acanthamoeba_castellanii_mamavirus	234071	253687
Nucleocytoviricota	Acanthamoeba_castellanii_mamavirus.fasta	JF801956.1	Acanthamoeba_castellanii_mamavirus	275116	325733
Nucleocytoviricota	Acanthamoeba_castellanii_mamavirus.fasta	JF801956.1	Acanthamoeba_castellanii_mamavirus	347162	366831
Nucleocytoviricota	Acanthamoeba_castellanii_mamavirus.fasta	JF801956.1	Acanthamoeba_castellanii_mamavirus	388260	401753
Nucleocytoviricota	Acanthamoeba_castellanii_mamavirus.fasta	JF801956.1	Acanthamoeba_castellanii_mamavirus	423182	434145
Nucleocytoviricota	Acanthamoeba_castellanii_mamavirus.fasta	JF801956.1	Acanthamoeba_castellanii_mamavirus	455574	493286
Nucleocytoviricota	Acanthamoeba_castellanii_mamavirus.fasta	JF801956.1	Acanthamoeba_castellanii_mamavirus	514715	527617
Nucleocytoviricota	Acanthamoeba_castellanii_mamavirus.fasta	JF801956.1	Acanthamoeba_castellanii_mamavirus	549046	559497
Nucleocytoviricota	Acanthamoeba_castellanii_mamavirus.fasta	JF801956.1	Acanthamoeba_castellanii_mamavirus	580926	591390
Nucleocytoviricota	Acanthamoeba_castellanii_mamavirus.fasta	JF801956.1	Acanthamoeba_castellanii_mamavirus	612819	623698
Nucleocytoviricota	Acanthamoeba_castellanii_mamavirus.fasta	JF801956.1	Acanthamoeba_castellanii_mamavirus	645127	661341
Nucleocytoviricota	Acanthamoeba_castellanii_mamavirus.fasta	JF801956.1	Acanthamoeba_castellanii_mamavirus	682770	706239
Nucleocytoviricota	Acanthamoeba_castellanii_mamavirus.fasta	JF801956.1	Acanthamoeba_castellanii_mamavirus	727668	742435
Nucleocytoviricota	Acanthamoeba_castellanii_mamavirus.fasta	JF801956.1	Acanthamoeba_castellanii_mamavirus	763864	774242
Nucleocytoviricota	Acanthamoeba_castellanii_mamavirus.fasta	JF801956.1	Acanthamoeba_castellanii_mamavirus	795671	808215
Nucleocytoviricota	Acanthamoeba_castellanii_mamavirus.fasta	JF801956.1	Acanthamoeba_castellanii_mamavirus	829644	850190
Nucleocytoviricota	Acanthamoeba_castellanii_mamavirus.fasta	JF801956.1	Acanthamoeba_castellanii_mamavirus	871619	919324
Nucleocytoviricota	Acanthamoeba_castellanii_mamavirus.fasta	JF801956.1	Acanthamoeba_castellanii_mamavirus	940753	967565
Nucleocytoviricota	Acanthamoeba_castellanii_mamavirus.fasta	JF801956.1	Acanthamoeba_castellanii_mamavirus	988994	1003857
Nucleocytoviricota	Acanthamoeba_castellanii_mamavirus.fasta	JF801956.1	Acanthamoeba_castellanii_mamavirus	1025286	1039345
Nucleocytoviricota	Acanthamoeba_castellanii_mamavirus.fasta	JF801956.1	Acanthamoeba_castellanii_mamavirus	1060774	1085558
Nucleocytoviricota	Acanthamoeba_castellanii_mamavirus.fasta	JF801956.1	Acanthamoeba_castellanii_mamavirus	1106987	1133304
Nucleocytoviricota	Acanthamoeba_castellanii_mamavirus.fasta	JF801956.1	Acanthamoeba_castellanii_mamavirus	1154733	1170273
Nucleocytoviricota	Acanthamoeba_castellanii_medusavirus.fasta	AP018495.1	Acanthamoeba_castellanii_medusavirus	1	11600
Nucleocytoviricota	Acanthamoeba_castellanii_medusavirus.fasta	AP018495.1	Acanthamoeba_castellanii_medusavirus	43280	56612
Nucleocytoviricota	Acanthamoeba_castellanii_medusavirus.fasta	AP018495.1	Acanthamoeba_castellanii_medusavirus	88292	99519
Nucleocytoviricota	Acanthamoeba_castellanii_medusavirus.fasta	AP018495.1	Acanthamoeba_castellanii_medusavirus	131199	143222
Nucleocytoviricota	Acanthamoeba_castellanii_medusavirus.fasta	AP018495.1	Acanthamoeba_castellanii_medusavirus	174902	197828
Nucleocytoviricota	Acanthamoeba_castellanii_medusavirus.fasta	AP018495.1	Acanthamoeba_castellanii_medusavirus	229508	239597
Nucleocytoviricota	Acanthamoeba_castellanii_medusavirus.fasta	AP018495.1	Acanthamoeba_castellanii_medusavirus	271277	288703
Nucleocytoviricota	Acanthamoeba_castellanii_medusavirus.fasta	AP018495.1	Acanthamoeba_castellanii_medusavirus	320383	349593
Nucleocytoviricota	Acanthamoeba_polyphaga_lentillevirus.fasta_2	AFYC01000002.1	Acanthamoeba_polyphaga_lentillevirus_2	1	11294
Nucleocytoviricota	Acanthamoeba_polyphaga_lentillevirus.fasta_2	AFYC01000002.1	Acanthamoeba_polyphaga_lentillevirus_2	20143	35971
Nucleocytoviricota	Acanthamoeba_polyphaga_lentillevirus.fasta_2	AFYC01000002.1	Acanthamoeba_polyphaga_lentillevirus_2	44820	72049
Nucleocytoviricota	Acanthamoeba_polyphaga_lentillevirus.fasta_4	AFYC01000004.1	Acanthamoeba_polyphaga_lentillevirus_4	1	18559
Nucleocytoviricota	Acanthamoeba_polyphaga_lentillevirus.fasta_5	AFYC01000005.1	Acanthamoeba_polyphaga_lentillevirus_5	1	26091
Nucleocytoviricota	Acanthamoeba_polyphaga_lentillevirus.fasta_5	AFYC01000005.1	Acanthamoeba_polyphaga_lentillevirus_5	28894	62318
Nucleocytoviricota	Acanthamoeba_polyphaga_lentillevirus.fasta_5	AFYC01000005.1	Acanthamoeba_polyphaga_lentillevirus_5	65121	78359
Nucleocytoviricota	Acanthamoeba_polyphaga_lentillevirus.fasta_5	AFYC01000005.1	Acanthamoeba_polyphaga_lentillevirus_5	81162	95943
Nucleocytoviricota	Acanthamoeba_polyphaga_lentillevirus.fasta_5	AFYC01000005.1	Acanthamoeba_polyphaga_lentillevirus_5	98746	114803
Nucleocytoviricota	Acanthamoeba_polyphaga_lentillevirus.fasta_5	AFYC01000005.1	Acanthamoeba_polyphaga_lentillevirus_5	117606	208105
Nucleocytoviricota	Acanthamoeba_polyphaga_lentillevirus.fasta_5	AFYC01000005.1	Acanthamoeba_polyphaga_lentillevirus_5	210908	262020
Nucleocytoviricota	Acanthamoeba_polyphaga_lentillevirus.fasta_5	AFYC01000005.1	Acanthamoeba_polyphaga_lentillevirus_5	264823	303975
Nucleocytoviricota	Acanthamoeba_polyphaga_lentillevirus.fasta_5	AFYC01000005.1	Acanthamoeba_polyphaga_lentillevirus_5	306778	317664
Nucleocytoviricota	Acanthamoeba_polyphaga_lentillevirus.fasta_5	AFYC01000005.1	Acanthamoeba_polyphaga_lentillevirus_5	320467	330744
Nucleocytoviricota	Acanthamoeba_polyphaga_lentillevirus.fasta_5	AFYC01000005.1	Acanthamoeba_polyphaga_lentillevirus_5	333547	359105
Nucleocytoviricota	Acanthamoeba_polyphaga_lentillevirus.fasta_5	AFYC01000005.1	Acanthamoeba_polyphaga_lentillevirus_5	361908	373491
Nucleocytoviricota	Acanthamoeba_polyphaga_lentillevirus.fasta_5	AFYC01000005.1	Acanthamoeba_polyphaga_lentillevirus_5	376294	392365
Nucleocytoviricota	Acanthamoeba_polyphaga_lentillevirus.fasta_5	AFYC01000005.1	Acanthamoeba_polyphaga_lentillevirus_5	395168	412830
Nucleocytoviricota	Acanthamoeba_polyphaga_lentillevirus.fasta_5	AFYC01000005.1	Acanthamoeba_polyphaga_lentillevirus_5	415633	426355
Nucleocytoviricota	Acanthamoeba_polyphaga_lentillevirus.fasta_5	AFYC01000005.1	Acanthamoeba_polyphaga_lentillevirus_5	429158	440159
Nucleocytoviricota	Acanthamoeba_polyphaga_lentillevirus.fasta_5	AFYC01000005.1	Acanthamoeba_polyphaga_lentillevirus_5	442962	455608
Nucleocytoviricota	Acanthamoeba_polyphaga_lentillevirus.fasta_5	AFYC01000005.1	Acanthamoeba_polyphaga_lentillevirus_5	458411	469381
Nucleocytoviricota	Acanthamoeba_polyphaga_lentillevirus.fasta_5	AFYC01000005.1	Acanthamoeba_polyphaga_lentillevirus_5	472184	498469
Nucleocytoviricota	Acanthamoeba_polyphaga_lentillevirus.fasta_5	AFYC01000005.1	Acanthamoeba_polyphaga_lentillevirus_5	501272	511286
Nucleocytoviricota	Acanthamoeba_polyphaga_lentillevirus.fasta_5	AFYC01000005.1	Acanthamoeba_polyphaga_lentillevirus_5	514089	603595
Nucleocytoviricota	Acanthamoeba_polyphaga_lentillevirus.fasta_5	AFYC01000005.1	Acanthamoeba_polyphaga_lentillevirus_5	606398	619076
Nucleocytoviricota	Acanthamoeba_polyphaga_lentillevirus.fasta_5	AFYC01000005.1	Acanthamoeba_polyphaga_lentillevirus_5	621879	637058
Nucleocytoviricota	Acanthamoeba_polyphaga_lentillevirus.fasta_5	AFYC01000005.1	Acanthamoeba_polyphaga_lentillevirus_5	639861	649984
Nucleocytoviricota	Acanthamoeba_polyphaga_lentillevirus.fasta_5	AFYC01000005.1	Acanthamoeba_polyphaga_lentillevirus_5	652787	715430
Nucleocytoviricota	Acanthamoeba_polyphaga_lentillevirus.fasta_5	AFYC01000005.1	Acanthamoeba_polyphaga_lentillevirus_5	718233	733284
Nucleocytoviricota	Acanthamoeba_polyphaga_lentillevirus.fasta_5	AFYC01000005.1	Acanthamoeba_polyphaga_lentillevirus_5	736087	747050
Nucleocytoviricota	Acanthamoeba_polyphaga_lentillevirus.fasta_5	AFYC01000005.1	Acanthamoeba_polyphaga_lentillevirus_5	749853	762159
Nucleocytoviricota	Acanthamoeba_polyphaga_lentillevirus.fasta_5	AFYC01000005.1	Acanthamoeba_polyphaga_lentillevirus_5	764962	785776
Nucleocytoviricota	Acanthamoeba_polyphaga_lentillevirus.fasta_6	AFYC01000006.1	Acanthamoeba_polyphaga_lentillevirus_6	1	12652
Nucleocytoviricota	Acanthamoeba_polyphaga_lentillevirus.fasta_7	AFYC01000007.1	Acanthamoeba_polyphaga_lentillevirus_7	1	10707
Nucleocytoviricota	Acanthamoeba_polyphaga_lentillevirus.fasta_7	AFYC01000007.1	Acanthamoeba_polyphaga_lentillevirus_7	10987	23377
Nucleocytoviricota	Acanthamoeba_polyphaga_lentillevirus.fasta_7	AFYC01000007.1	Acanthamoeba_polyphaga_lentillevirus_7	23657	36311
Nucleocytoviricota	Acanthamoeba_polyphaga_lentillevirus.fasta_7	AFYC01000007.1	Acanthamoeba_polyphaga_lentillevirus_7	36591	64831
Nucleocytoviricota	Acanthamoeba_polyphaga_lentillevirus.fasta_7	AFYC01000007.1	Acanthamoeba_polyphaga_lentillevirus_7	65111	80322
Nucleocytoviricota	Acanthamoeba_polyphaga_lentillevirus.fasta_7	AFYC01000007.1	Acanthamoeba_polyphaga_lentillevirus_7	80602	91689
Nucleocytoviricota	Acanthamoeba_polyphaga_lentillevirus.fasta_7	AFYC01000007.1	Acanthamoeba_polyphaga_lentillevirus_7	91969	104985
Nucleocytoviricota	Acanthamoeba_polyphaga_lentillevirus.fasta_8	AFYC01000008.1	Acanthamoeba_polyphaga_lentillevirus_8	1	11607
Nucleocytoviricota	Acanthamoeba_polyphaga_lentillevirus.fasta_8	AFYC01000008.1	Acanthamoeba_polyphaga_lentillevirus_8	17108	28558
Nucleocytoviricota	Acanthamoeba_polyphaga_lentillevirus.fasta_8	AFYC01000008.1	Acanthamoeba_polyphaga_lentillevirus_8	34059	57772
Nucleocytoviricota	Acanthamoeba_polyphaga_lentillevirus.fasta_8	AFYC01000008.1	Acanthamoeba_polyphaga_lentillevirus_8	63273	74661
Nucleocytoviricota	Acanthamoeba_polyphaga_mimivirus.fasta	NC_014649.1	Acanthamoeba_polyphaga_mimivirus	1	12668
Nucleocytoviricota	Acanthamoeba_polyphaga_mimivirus.fasta	NC_014649.1	Acanthamoeba_polyphaga_mimivirus	34941	46012
Nucleocytoviricota	Acanthamoeba_polyphaga_mimivirus.fasta	NC_014649.1	Acanthamoeba_polyphaga_mimivirus	68285	90813
Nucleocytoviricota	Acanthamoeba_polyphaga_mimivirus.fasta	NC_014649.1	Acanthamoeba_polyphaga_mimivirus	113086	124071
Nucleocytoviricota	Acanthamoeba_polyphaga_mimivirus.fasta	NC_014649.1	Acanthamoeba_polyphaga_mimivirus	146344	177757
Nucleocytoviricota	Acanthamoeba_polyphaga_mimivirus.fasta	NC_014649.1	Acanthamoeba_polyphaga_mimivirus	200030	237372
Nucleocytoviricota	Acanthamoeba_polyphaga_mimivirus.fasta	NC_014649.1	Acanthamoeba_polyphaga_mimivirus	259645	275643
Nucleocytoviricota	Acanthamoeba_polyphaga_mimivirus.fasta	NC_014649.1	Acanthamoeba_polyphaga_mimivirus	297916	317949
Nucleocytoviricota	Acanthamoeba_polyphaga_mimivirus.fasta	NC_014649.1	Acanthamoeba_polyphaga_mimivirus	340222	357457
Nucleocytoviricota	Acanthamoeba_polyphaga_mimivirus.fasta	NC_014649.1	Acanthamoeba_polyphaga_mimivirus	379730	410452
Nucleocytoviricota	Acanthamoeba_polyphaga_mimivirus.fasta	NC_014649.1	Acanthamoeba_polyphaga_mimivirus	432725	444776
Nucleocytoviricota	Acanthamoeba_polyphaga_mimivirus.fasta	NC_014649.1	Acanthamoeba_polyphaga_mimivirus	467049	477714
Nucleocytoviricota	Acanthamoeba_polyphaga_mimivirus.fasta	NC_014649.1	Acanthamoeba_polyphaga_mimivirus	499987	511646
Nucleocytoviricota	Acanthamoeba_polyphaga_mimivirus.fasta	NC_014649.1	Acanthamoeba_polyphaga_mimivirus	533919	553918
Nucleocytoviricota	Acanthamoeba_polyphaga_mimivirus.fasta	NC_014649.1	Acanthamoeba_polyphaga_mimivirus	576191	586305
Nucleocytoviricota	Acanthamoeba_polyphaga_mimivirus.fasta	NC_014649.1	Acanthamoeba_polyphaga_mimivirus	608578	621322
Nucleocytoviricota	Acanthamoeba_polyphaga_mimivirus.fasta	NC_014649.1	Acanthamoeba_polyphaga_mimivirus	643595	655632
Nucleocytoviricota	Acanthamoeba_polyphaga_mimivirus.fasta	NC_014649.1	Acanthamoeba_polyphaga_mimivirus	677905	700495
Nucleocytoviricota	Acanthamoeba_polyphaga_mimivirus.fasta	NC_014649.1	Acanthamoeba_polyphaga_mimivirus	722768	734933
Nucleocytoviricota	Acanthamoeba_polyphaga_mimivirus.fasta	NC_014649.1	Acanthamoeba_polyphaga_mimivirus	757206	768206
Nucleocytoviricota	Acanthamoeba_polyphaga_mimivirus.fasta	NC_014649.1	Acanthamoeba_polyphaga_mimivirus	790479	810354
Nucleocytoviricota	Acanthamoeba_polyphaga_mimivirus.fasta	NC_014649.1	Acanthamoeba_polyphaga_mimivirus	832627	845643
Nucleocytoviricota	Acanthamoeba_polyphaga_mimivirus.fasta	NC_014649.1	Acanthamoeba_polyphaga_mimivirus	867916	878082
Nucleocytoviricota	Acanthamoeba_polyphaga_mimivirus.fasta	NC_014649.1	Acanthamoeba_polyphaga_mimivirus	900355	948428
Nucleocytoviricota	Acanthamoeba_polyphaga_mimivirus.fasta	NC_014649.1	Acanthamoeba_polyphaga_mimivirus	970701	998814
Nucleocytoviricota	Acanthamoeba_polyphaga_mimivirus.fasta	NC_014649.1	Acanthamoeba_polyphaga_mimivirus	1021087	1032885
Nucleocytoviricota	Acanthamoeba_polyphaga_mimivirus.fasta	NC_014649.1	Acanthamoeba_polyphaga_mimivirus	1055158	1066991
Nucleocytoviricota	Acanthamoeba_polyphaga_mimivirus.fasta	NC_014649.1	Acanthamoeba_polyphaga_mimivirus	1089264	1099432
Nucleocytoviricota	Acanthamoeba_polyphaga_mimivirus.fasta	NC_014649.1	Acanthamoeba_polyphaga_mimivirus	1121705	1159281
Nucleocytoviricota	Acanthamoeba_polyphaga_moumouvirus.fasta	NC_020104.1	Acanthamoeba_polyphaga_moumouvirus	1	14829
Nucleocytoviricota	Acanthamoeba_polyphaga_moumouvirus.fasta	NC_020104.1	Acanthamoeba_polyphaga_moumouvirus	31783	44674
Nucleocytoviricota	Acanthamoeba_polyphaga_moumouvirus.fasta	NC_020104.1	Acanthamoeba_polyphaga_moumouvirus	61628	73562
Nucleocytoviricota	Acanthamoeba_polyphaga_moumouvirus.fasta	NC_020104.1	Acanthamoeba_polyphaga_moumouvirus	90516	102422
Nucleocytoviricota	Acanthamoeba_polyphaga_moumouvirus.fasta	NC_020104.1	Acanthamoeba_polyphaga_moumouvirus	119376	144992
Nucleocytoviricota	Acanthamoeba_polyphaga_moumouvirus.fasta	NC_020104.1	Acanthamoeba_polyphaga_moumouvirus	161946	173460
Nucleocytoviricota	Acanthamoeba_polyphaga_moumouvirus.fasta	NC_020104.1	Acanthamoeba_polyphaga_moumouvirus	190414	202383
Nucleocytoviricota	Acanthamoeba_polyphaga_moumouvirus.fasta	NC_020104.1	Acanthamoeba_polyphaga_moumouvirus	219337	247558
Nucleocytoviricota	Acanthamoeba_polyphaga_moumouvirus.fasta	NC_020104.1	Acanthamoeba_polyphaga_moumouvirus	264512	274846
Nucleocytoviricota	Acanthamoeba_polyphaga_moumouvirus.fasta	NC_020104.1	Acanthamoeba_polyphaga_moumouvirus	291800	302274
Nucleocytoviricota	Acanthamoeba_polyphaga_moumouvirus.fasta	NC_020104.1	Acanthamoeba_polyphaga_moumouvirus	319228	374748
Nucleocytoviricota	Acanthamoeba_polyphaga_moumouvirus.fasta	NC_020104.1	Acanthamoeba_polyphaga_moumouvirus	391702	402320
Nucleocytoviricota	Acanthamoeba_polyphaga_moumouvirus.fasta	NC_020104.1	Acanthamoeba_polyphaga_moumouvirus	419274	430887
Nucleocytoviricota	Acanthamoeba_polyphaga_moumouvirus.fasta	NC_020104.1	Acanthamoeba_polyphaga_moumouvirus	447841	487642
Nucleocytoviricota	Acanthamoeba_polyphaga_moumouvirus.fasta	NC_020104.1	Acanthamoeba_polyphaga_moumouvirus	504596	543195
Nucleocytoviricota	Acanthamoeba_polyphaga_moumouvirus.fasta	NC_020104.1	Acanthamoeba_polyphaga_moumouvirus	560149	613140
Nucleocytoviricota	Acanthamoeba_polyphaga_moumouvirus.fasta	NC_020104.1	Acanthamoeba_polyphaga_moumouvirus	630094	641839
Nucleocytoviricota	Acanthamoeba_polyphaga_moumouvirus.fasta	NC_020104.1	Acanthamoeba_polyphaga_moumouvirus	658793	668813
Nucleocytoviricota	Acanthamoeba_polyphaga_moumouvirus.fasta	NC_020104.1	Acanthamoeba_polyphaga_moumouvirus	685767	705623
Nucleocytoviricota	Acanthamoeba_polyphaga_moumouvirus.fasta	NC_020104.1	Acanthamoeba_polyphaga_moumouvirus	722577	741766
Nucleocytoviricota	Acanthamoeba_polyphaga_moumouvirus.fasta	NC_020104.1	Acanthamoeba_polyphaga_moumouvirus	758720	771079
Nucleocytoviricota	Acanthamoeba_polyphaga_moumouvirus.fasta	NC_020104.1	Acanthamoeba_polyphaga_moumouvirus	788033	800035
Nucleocytoviricota	Acanthamoeba_polyphaga_moumouvirus.fasta	NC_020104.1	Acanthamoeba_polyphaga_moumouvirus	816989	827740
Nucleocytoviricota	Acanthamoeba_polyphaga_moumouvirus.fasta	NC_020104.1	Acanthamoeba_polyphaga_moumouvirus	844694	860004
Nucleocytoviricota	Acanthamoeba_polyphaga_moumouvirus.fasta	NC_020104.1	Acanthamoeba_polyphaga_moumouvirus	876958	888158
Nucleocytoviricota	Acanthamoeba_polyphaga_moumouvirus.fasta	NC_020104.1	Acanthamoeba_polyphaga_moumouvirus	905112	917799
Nucleocytoviricota	Acanthamoeba_polyphaga_moumouvirus.fasta	NC_020104.1	Acanthamoeba_polyphaga_moumouvirus	934753	950130
Nucleocytoviricota	Acanthamoeba_polyphaga_moumouvirus.fasta	NC_020104.1	Acanthamoeba_polyphaga_moumouvirus	967084	977217
Nucleocytoviricota	Acanthamoeba_polyphaga_moumouvirus.fasta	NC_020104.1	Acanthamoeba_polyphaga_moumouvirus	994171	1004403
Nucleocytoviricota	Acanthocystis_turfacea_Chlorella_virus_1.fasta	NC_008724.1	Acanthocystis_turfacea_Chlorella_virus_1	1	27620
Nucleocytoviricota	Acanthocystis_turfacea_Chlorella_virus_1.fasta	NC_008724.1	Acanthocystis_turfacea_Chlorella_virus_1	29339	41473
Nucleocytoviricota	Acanthocystis_turfacea_Chlorella_virus_1.fasta	NC_008724.1	Acanthocystis_turfacea_Chlorella_virus_1	43192	66343
Nucleocytoviricota	Acanthocystis_turfacea_Chlorella_virus_1.fasta	NC_008724.1	Acanthocystis_turfacea_Chlorella_virus_1	68062	91131
Nucleocytoviricota	Acanthocystis_turfacea_Chlorella_virus_1.fasta	NC_008724.1	Acanthocystis_turfacea_Chlorella_virus_1	92850	110069
Nucleocytoviricota	Acanthocystis_turfacea_Chlorella_virus_1.fasta	NC_008724.1	Acanthocystis_turfacea_Chlorella_virus_1	111788	129160
Nucleocytoviricota	Acanthocystis_turfacea_Chlorella_virus_1.fasta	NC_008724.1	Acanthocystis_turfacea_Chlorella_virus_1	130879	157078
Nucleocytoviricota	Acanthocystis_turfacea_Chlorella_virus_1.fasta	NC_008724.1	Acanthocystis_turfacea_Chlorella_virus_1	158797	184926
Nucleocytoviricota	Acanthocystis_turfacea_Chlorella_virus_1.fasta	NC_008724.1	Acanthocystis_turfacea_Chlorella_virus_1	186645	197976
Nucleocytoviricota	Acanthocystis_turfacea_Chlorella_virus_1.fasta	NC_008724.1	Acanthocystis_turfacea_Chlorella_virus_1	199695	211344
Nucleocytoviricota	Acanthocystis_turfacea_Chlorella_virus_1.fasta	NC_008724.1	Acanthocystis_turfacea_Chlorella_virus_1	213063	231392
Nucleocytoviricota	Acanthocystis_turfacea_Chlorella_virus_1.fasta	NC_008724.1	Acanthocystis_turfacea_Chlorella_virus_1	233111	248077
Nucleocytoviricota	Acanthocystis_turfacea_Chlorella_virus_1.fasta	NC_008724.1	Acanthocystis_turfacea_Chlorella_virus_1	249796	269609
Nucleocytoviricota	Acanthocystis_turfacea_Chlorella_virus_1.fasta	NC_008724.1	Acanthocystis_turfacea_Chlorella_virus_1	271328	286330
Nucleocytoviricota	African_swine_fever_virus.fasta	NC_001659.2	African_swine_fever_virus	1	13304
Nucleocytoviricota	African_swine_fever_virus.fasta	NC_001659.2	African_swine_fever_virus	14982	57423
Nucleocytoviricota	African_swine_fever_virus.fasta	NC_001659.2	African_swine_fever_virus	59101	70170
Nucleocytoviricota	African_swine_fever_virus.fasta	NC_001659.2	African_swine_fever_virus	71848	121535
Nucleocytoviricota	African_swine_fever_virus.fasta	NC_001659.2	African_swine_fever_virus	123213	133566
Nucleocytoviricota	African_swine_fever_virus.fasta	NC_001659.2	African_swine_fever_virus	135244	168426
Nucleocytoviricota	Anopheles_minimus_irodovirus.fasta	NC_023848.1	Anopheles_minimus_irodovirus	1	28110
Nucleocytoviricota	Anopheles_minimus_irodovirus.fasta	NC_023848.1	Anopheles_minimus_irodovirus	30328	40646
Nucleocytoviricota	Anopheles_minimus_irodovirus.fasta	NC_023848.1	Anopheles_minimus_irodovirus	42864	59153
Nucleocytoviricota	Anopheles_minimus_irodovirus.fasta	NC_023848.1	Anopheles_minimus_irodovirus	61371	77967
Nucleocytoviricota	Anopheles_minimus_irodovirus.fasta	NC_023848.1	Anopheles_minimus_irodovirus	80185	94688
Nucleocytoviricota	Anopheles_minimus_irodovirus.fasta	NC_023848.1	Anopheles_minimus_irodovirus	96906	107057
Nucleocytoviricota	Anopheles_minimus_irodovirus.fasta	NC_023848.1	Anopheles_minimus_irodovirus	109275	123575
Nucleocytoviricota	Anopheles_minimus_irodovirus.fasta	NC_023848.1	Anopheles_minimus_irodovirus	125793	137305
Nucleocytoviricota	Anopheles_minimus_irodovirus.fasta	NC_023848.1	Anopheles_minimus_irodovirus	139523	160805
Nucleocytoviricota	Armadillidium_vulgare_iridescent_virus.fasta	NC_024451.1	Armadillidium_vulgare_iridescent_virus	1	11169
Nucleocytoviricota	Armadillidium_vulgare_iridescent_virus.fasta	NC_024451.1	Armadillidium_vulgare_iridescent_virus	11967	46748
Nucleocytoviricota	Armadillidium_vulgare_iridescent_virus.fasta	NC_024451.1	Armadillidium_vulgare_iridescent_virus	47546	82496
Nucleocytoviricota	Armadillidium_vulgare_iridescent_virus.fasta	NC_024451.1	Armadillidium_vulgare_iridescent_virus	83294	95193
Nucleocytoviricota	Armadillidium_vulgare_iridescent_virus.fasta	NC_024451.1	Armadillidium_vulgare_iridescent_virus	95991	106446
Nucleocytoviricota	Armadillidium_vulgare_iridescent_virus.fasta	NC_024451.1	Armadillidium_vulgare_iridescent_virus	107244	118576
Nucleocytoviricota	Armadillidium_vulgare_iridescent_virus.fasta	NC_024451.1	Armadillidium_vulgare_iridescent_virus	119374	156684
Nucleocytoviricota	Armadillidium_vulgare_iridescent_virus.fasta	NC_024451.1	Armadillidium_vulgare_iridescent_virus	157482	173436
Nucleocytoviricota	Armadillidium_vulgare_iridescent_virus.fasta	NC_024451.1	Armadillidium_vulgare_iridescent_virus	174234	186182
Nucleocytoviricota	Armadillidium_vulgare_iridescent_virus.fasta	NC_024451.1	Armadillidium_vulgare_iridescent_virus	186980	198228
Nucleocytoviricota	Armadillidium_vulgare_iridescent_virus.fasta	NC_024451.1	Armadillidium_vulgare_iridescent_virus	199026	219423
Nucleocytoviricota	Bodo_Saltans_virus.fasta	MF782455.1	Bodo_Saltans_virus	1	25379
Nucleocytoviricota	Bodo_Saltans_virus.fasta	MF782455.1	Bodo_Saltans_virus	45118	154383
Nucleocytoviricota	Bodo_Saltans_virus.fasta	MF782455.1	Bodo_Saltans_virus	174122	185626
Nucleocytoviricota	Bodo_Saltans_virus.fasta	MF782455.1	Bodo_Saltans_virus	205365	256728
Nucleocytoviricota	Bodo_Saltans_virus.fasta	MF782455.1	Bodo_Saltans_virus	276467	306882
Nucleocytoviricota	Bodo_Saltans_virus.fasta	MF782455.1	Bodo_Saltans_virus	326621	345712
Nucleocytoviricota	Bodo_Saltans_virus.fasta	MF782455.1	Bodo_Saltans_virus	365451	376982
Nucleocytoviricota	Bodo_Saltans_virus.fasta	MF782455.1	Bodo_Saltans_virus	396721	416232
Nucleocytoviricota	Bodo_Saltans_virus.fasta	MF782455.1	Bodo_Saltans_virus	435971	460969
Nucleocytoviricota	Bodo_Saltans_virus.fasta	MF782455.1	Bodo_Saltans_virus	480708	511422
Nucleocytoviricota	Bodo_Saltans_virus.fasta	MF782455.1	Bodo_Saltans_virus	531161	544187
Nucleocytoviricota	Bodo_Saltans_virus.fasta	MF782455.1	Bodo_Saltans_virus	563926	575516
Nucleocytoviricota	Bodo_Saltans_virus.fasta	MF782455.1	Bodo_Saltans_virus	595255	635021
Nucleocytoviricota	Bodo_Saltans_virus.fasta	MF782455.1	Bodo_Saltans_virus	654760	681039
Nucleocytoviricota	Bodo_Saltans_virus.fasta	MF782455.1	Bodo_Saltans_virus	700778	712824
Nucleocytoviricota	Bodo_Saltans_virus.fasta	MF782455.1	Bodo_Saltans_virus	732563	748821
Nucleocytoviricota	Bodo_Saltans_virus.fasta	MF782455.1	Bodo_Saltans_virus	768560	788378
Nucleocytoviricota	Bodo_Saltans_virus.fasta	MF782455.1	Bodo_Saltans_virus	808117	824169
Nucleocytoviricota	Bodo_Saltans_virus.fasta	MF782455.1	Bodo_Saltans_virus	843908	889077
Nucleocytoviricota	Bodo_Saltans_virus.fasta	MF782455.1	Bodo_Saltans_virus	908816	919051
Nucleocytoviricota	Bodo_Saltans_virus.fasta	MF782455.1	Bodo_Saltans_virus	938790	950904
Nucleocytoviricota	Bodo_Saltans_virus.fasta	MF782455.1	Bodo_Saltans_virus	970643	993036
Nucleocytoviricota	Bodo_Saltans_virus.fasta	MF782455.1	Bodo_Saltans_virus	1012775	1056820
Nucleocytoviricota	Bodo_Saltans_virus.fasta	MF782455.1	Bodo_Saltans_virus	1076559	1186251
Nucleocytoviricota	Bodo_Saltans_virus.fasta	MF782455.1	Bodo_Saltans_virus	1205990	1221897
Nucleocytoviricota	Bodo_Saltans_virus.fasta	MF782455.1	Bodo_Saltans_virus	1241636	1258803
Nucleocytoviricota	Bodo_Saltans_virus.fasta	MF782455.1	Bodo_Saltans_virus	1278542	1300694
Nucleocytoviricota	Bodo_Saltans_virus.fasta	MF782455.1	Bodo_Saltans_virus	1320433	1332076
Nucleocytoviricota	Bodo_Saltans_virus.fasta	MF782455.1	Bodo_Saltans_virus	1351815	1366121
Nucleocytoviricota	Cafeteria_roenbergensis_virus.fasta	NC_014637.1	Cafeteria_roenbergensis_virus	1	25103
Nucleocytoviricota	Cafeteria_roenbergensis_virus.fasta	NC_014637.1	Cafeteria_roenbergensis_virus	28363	46909
Nucleocytoviricota	Cafeteria_roenbergensis_virus.fasta	NC_014637.1	Cafeteria_roenbergensis_virus	50169	86465
Nucleocytoviricota	Cafeteria_roenbergensis_virus.fasta	NC_014637.1	Cafeteria_roenbergensis_virus	89725	105414
Nucleocytoviricota	Cafeteria_roenbergensis_virus.fasta	NC_014637.1	Cafeteria_roenbergensis_virus	108674	128024
Nucleocytoviricota	Cafeteria_roenbergensis_virus.fasta	NC_014637.1	Cafeteria_roenbergensis_virus	131284	141834
Nucleocytoviricota	Cafeteria_roenbergensis_virus.fasta	NC_014637.1	Cafeteria_roenbergensis_virus	145094	156174
Nucleocytoviricota	Cafeteria_roenbergensis_virus.fasta	NC_014637.1	Cafeteria_roenbergensis_virus	159434	173178
Nucleocytoviricota	Cafeteria_roenbergensis_virus.fasta	NC_014637.1	Cafeteria_roenbergensis_virus	176438	193081
Nucleocytoviricota	Cafeteria_roenbergensis_virus.fasta	NC_014637.1	Cafeteria_roenbergensis_virus	196341	208141
Nucleocytoviricota	Cafeteria_roenbergensis_virus.fasta	NC_014637.1	Cafeteria_roenbergensis_virus	211401	242364
Nucleocytoviricota	Cafeteria_roenbergensis_virus.fasta	NC_014637.1	Cafeteria_roenbergensis_virus	245624	256053
Nucleocytoviricota	Cafeteria_roenbergensis_virus.fasta	NC_014637.1	Cafeteria_roenbergensis_virus	259313	272958
Nucleocytoviricota	Cafeteria_roenbergensis_virus.fasta	NC_014637.1	Cafeteria_roenbergensis_virus	276218	299310
Nucleocytoviricota	Cafeteria_roenbergensis_virus.fasta	NC_014637.1	Cafeteria_roenbergensis_virus	302570	336423
Nucleocytoviricota	Cafeteria_roenbergensis_virus.fasta	NC_014637.1	Cafeteria_roenbergensis_virus	339683	350454
Nucleocytoviricota	Cafeteria_roenbergensis_virus.fasta	NC_014637.1	Cafeteria_roenbergensis_virus	353714	370261
Nucleocytoviricota	Cafeteria_roenbergensis_virus.fasta	NC_014637.1	Cafeteria_roenbergensis_virus	373521	385373
Nucleocytoviricota	Cafeteria_roenbergensis_virus.fasta	NC_014637.1	Cafeteria_roenbergensis_virus	388633	399775
Nucleocytoviricota	Cafeteria_roenbergensis_virus.fasta	NC_014637.1	Cafeteria_roenbergensis_virus	403035	414616
Nucleocytoviricota	Cafeteria_roenbergensis_virus.fasta	NC_014637.1	Cafeteria_roenbergensis_virus	417876	439005
Nucleocytoviricota	Cafeteria_roenbergensis_virus.fasta	NC_014637.1	Cafeteria_roenbergensis_virus	442265	460664
Nucleocytoviricota	Cafeteria_roenbergensis_virus.fasta	NC_014637.1	Cafeteria_roenbergensis_virus	463924	493331
Nucleocytoviricota	Cafeteria_roenbergensis_virus.fasta	NC_014637.1	Cafeteria_roenbergensis_virus	496591	506754
Nucleocytoviricota	Cafeteria_roenbergensis_virus.fasta	NC_014637.1	Cafeteria_roenbergensis_virus	510014	541785
Nucleocytoviricota	Cafeteria_roenbergensis_virus.fasta	NC_014637.1	Cafeteria_roenbergensis_virus	545045	560538
Nucleocytoviricota	Cafeteria_roenbergensis_virus.fasta	NC_014637.1	Cafeteria_roenbergensis_virus	563798	584493
Nucleocytoviricota	Cafeteria_roenbergensis_virus.fasta	NC_014637.1	Cafeteria_roenbergensis_virus	587753	600667
Nucleocytoviricota	Cafeteria_roenbergensis_virus.fasta	NC_014637.1	Cafeteria_roenbergensis_virus	603927	614183
Nucleocytoviricota	Cannes_8_virus.fasta	KF261120.1	Cannes_8_virus	1	19817
Nucleocytoviricota	Cannes_8_virus.fasta	KF261120.1	Cannes_8_virus	20388	42696
Nucleocytoviricota	Cannes_8_virus.fasta	KF261120.1	Cannes_8_virus	43267	58077
Nucleocytoviricota	Cannes_8_virus.fasta	KF261120.1	Cannes_8_virus	58648	84330
Nucleocytoviricota	Cannes_8_virus.fasta	KF261120.1	Cannes_8_virus	84901	96055
Nucleocytoviricota	Cannes_8_virus.fasta	KF261120.1	Cannes_8_virus	96626	119714
Nucleocytoviricota	Cannes_8_virus.fasta	KF261120.1	Cannes_8_virus	120285	151069
Nucleocytoviricota	Cannes_8_virus.fasta	KF261120.1	Cannes_8_virus	151640	161823
Nucleocytoviricota	Cannes_8_virus.fasta	KF261120.1	Cannes_8_virus	162394	277992
Nucleocytoviricota	Cannes_8_virus.fasta	KF261120.1	Cannes_8_virus	278563	373469
Nucleocytoviricota	Catovirus.fasta_1	KY684083.1	Catovirus_1	1	25495
Nucleocytoviricota	Catovirus.fasta_1	KY684083.1	Catovirus_1	46120	73461
Nucleocytoviricota	Catovirus.fasta_1	KY684083.1	Catovirus_1	94086	107790
Nucleocytoviricota	Catovirus.fasta_1	KY684083.1	Catovirus_1	128415	174182
Nucleocytoviricota	Catovirus.fasta_1	KY684083.1	Catovirus_1	194807	204992
Nucleocytoviricota	Catovirus.fasta_1	KY684083.1	Catovirus_1	225617	238739
Nucleocytoviricota	Catovirus.fasta_1	KY684083.1	Catovirus_1	259364	270921
Nucleocytoviricota	Catovirus.fasta_1	KY684083.1	Catovirus_1	291546	302121
Nucleocytoviricota	Catovirus.fasta_1	KY684083.1	Catovirus_1	322746	349943
Nucleocytoviricota	Catovirus.fasta_1	KY684083.1	Catovirus_1	370568	382864
Nucleocytoviricota	Catovirus.fasta_1	KY684083.1	Catovirus_1	403489	414038
Nucleocytoviricota	Catovirus.fasta_1	KY684083.1	Catovirus_1	434663	462866
Nucleocytoviricota	Catovirus.fasta_1	KY684083.1	Catovirus_1	483491	507889
Nucleocytoviricota	Catovirus.fasta_1	KY684083.1	Catovirus_1	528514	546993
Nucleocytoviricota	Catovirus.fasta_1	KY684083.1	Catovirus_1	567618	592686
Nucleocytoviricota	Catovirus.fasta_1	KY684083.1	Catovirus_1	613311	627433
Nucleocytoviricota	Catovirus.fasta_1	KY684083.1	Catovirus_1	648058	660775
Nucleocytoviricota	Catovirus.fasta_1	KY684083.1	Catovirus_1	681400	714990
Nucleocytoviricota	Catovirus.fasta_1	KY684083.1	Catovirus_1	735615	747007
Nucleocytoviricota	Catovirus.fasta_1	KY684083.1	Catovirus_1	767632	778872
Nucleocytoviricota	Catovirus.fasta_1	KY684083.1	Catovirus_1	799497	810211
Nucleocytoviricota	Catovirus.fasta_1	KY684083.1	Catovirus_1	830836	854015
Nucleocytoviricota	Catovirus.fasta_1	KY684083.1	Catovirus_1	874640	895770
Nucleocytoviricota	Catovirus.fasta_1	KY684083.1	Catovirus_1	916395	933686
Nucleocytoviricota	Catovirus.fasta_1	KY684083.1	Catovirus_1	954311	964974
Nucleocytoviricota	Catovirus.fasta_1	KY684083.1	Catovirus_1	985599	1019060
Nucleocytoviricota	Catovirus.fasta_1	KY684083.1	Catovirus_1	1039685	1049990
Nucleocytoviricota	Catovirus.fasta_1	KY684083.1	Catovirus_1	1070615	1092582
Nucleocytoviricota	Catovirus.fasta_1	KY684083.1	Catovirus_1	1113207	1131682
Nucleocytoviricota	Catovirus.fasta_2	KY684084.1	Catovirus_2	1	14598
Nucleocytoviricota	Catovirus.fasta_2	KY684084.1	Catovirus_2	15191	30645
Nucleocytoviricota	Catovirus.fasta_2	KY684084.1	Catovirus_2	31238	59812
Nucleocytoviricota	Catovirus.fasta_2	KY684084.1	Catovirus_2	60405	81404
Nucleocytoviricota	Catovirus.fasta_2	KY684084.1	Catovirus_2	81997	92859
Nucleocytoviricota	Catovirus.fasta_2	KY684084.1	Catovirus_2	93452	103840
Nucleocytoviricota	Catovirus.fasta_2	KY684084.1	Catovirus_2	104433	114764
Nucleocytoviricota	Catovirus.fasta_2	KY684084.1	Catovirus_2	115357	125443
Nucleocytoviricota	Catovirus.fasta_2	KY684084.1	Catovirus_2	126036	136871
Nucleocytoviricota	Catovirus.fasta_2	KY684084.1	Catovirus_2	137464	158871
Nucleocytoviricota	Catovirus.fasta_2	KY684084.1	Catovirus_2	159464	210780
Nucleocytoviricota	Catovirus.fasta_2	KY684084.1	Catovirus_2	211373	233791
Nucleocytoviricota	Catovirus.fasta_2	KY684084.1	Catovirus_2	234384	247176
Nucleocytoviricota	Catovirus.fasta_2	KY684084.1	Catovirus_2	247769	260883
Nucleocytoviricota	Catovirus.fasta_2	KY684084.1	Catovirus_2	261476	274130
Nucleocytoviricota	Catovirus.fasta_2	KY684084.1	Catovirus_2	274723	304416
Nucleocytoviricota	Catovirus.fasta_2	KY684084.1	Catovirus_2	305009	351788
Nucleocytoviricota	Catovirus.fasta_2	KY684084.1	Catovirus_2	352381	366670
Nucleocytoviricota	Catovirus.fasta_2	KY684084.1	Catovirus_2	367263	379345
Nucleocytoviricota	Cedratvirus_A11.fasta	NC_032108.1	Cedratvirus_A11	1	98049
Nucleocytoviricota	Cedratvirus_A11.fasta	NC_032108.1	Cedratvirus_A11	98556	110401
Nucleocytoviricota	Cedratvirus_A11.fasta	NC_032108.1	Cedratvirus_A11	110908	121761
Nucleocytoviricota	Cedratvirus_A11.fasta	NC_032108.1	Cedratvirus_A11	122268	140933
Nucleocytoviricota	Cedratvirus_A11.fasta	NC_032108.1	Cedratvirus_A11	141440	161526
Nucleocytoviricota	Cedratvirus_A11.fasta	NC_032108.1	Cedratvirus_A11	162033	174179
Nucleocytoviricota	Cedratvirus_A11.fasta	NC_032108.1	Cedratvirus_A11	174686	193673
Nucleocytoviricota	Cedratvirus_A11.fasta	NC_032108.1	Cedratvirus_A11	194180	205810
Nucleocytoviricota	Cedratvirus_A11.fasta	NC_032108.1	Cedratvirus_A11	206317	241158
Nucleocytoviricota	Cedratvirus_A11.fasta	NC_032108.1	Cedratvirus_A11	241665	256048
Nucleocytoviricota	Cedratvirus_A11.fasta	NC_032108.1	Cedratvirus_A11	256555	273170
Nucleocytoviricota	Cedratvirus_A11.fasta	NC_032108.1	Cedratvirus_A11	273677	285774
Nucleocytoviricota	Cedratvirus_A11.fasta	NC_032108.1	Cedratvirus_A11	286281	302546
Nucleocytoviricota	Cedratvirus_A11.fasta	NC_032108.1	Cedratvirus_A11	303053	318797
Nucleocytoviricota	Cedratvirus_A11.fasta	NC_032108.1	Cedratvirus_A11	319304	332453
Nucleocytoviricota	Cedratvirus_A11.fasta	NC_032108.1	Cedratvirus_A11	332960	347626
Nucleocytoviricota	Cedratvirus_A11.fasta	NC_032108.1	Cedratvirus_A11	348133	362428
Nucleocytoviricota	Cedratvirus_A11.fasta	NC_032108.1	Cedratvirus_A11	362935	406774
Nucleocytoviricota	Cedratvirus_A11.fasta	NC_032108.1	Cedratvirus_A11	407281	429627
Nucleocytoviricota	Cedratvirus_A11.fasta	NC_032108.1	Cedratvirus_A11	430134	443142
Nucleocytoviricota	Cedratvirus_A11.fasta	NC_032108.1	Cedratvirus_A11	443649	461758
Nucleocytoviricota	Cedratvirus_A11.fasta	NC_032108.1	Cedratvirus_A11	462265	473631
Nucleocytoviricota	Cedratvirus_A11.fasta	NC_032108.1	Cedratvirus_A11	474138	486976
Nucleocytoviricota	Cedratvirus_A11.fasta	NC_032108.1	Cedratvirus_A11	487483	498161
Nucleocytoviricota	Cedratvirus_A11.fasta	NC_032108.1	Cedratvirus_A11	498668	541039
Nucleocytoviricota	Cedratvirus_A11.fasta	NC_032108.1	Cedratvirus_A11	541546	573445
Nucleocytoviricota	Cedratvirus_A11.fasta	NC_032108.1	Cedratvirus_A11	573952	588554
Nucleocytoviricota	Cedratvirus_kamchatka.fasta	MN873693.1	Cedratvirus_kamchatka	1	39452
Nucleocytoviricota	Cedratvirus_kamchatka.fasta	MN873693.1	Cedratvirus_kamchatka	39785	51855
Nucleocytoviricota	Cedratvirus_kamchatka.fasta	MN873693.1	Cedratvirus_kamchatka	52188	62268
Nucleocytoviricota	Cedratvirus_kamchatka.fasta	MN873693.1	Cedratvirus_kamchatka	62601	77665
Nucleocytoviricota	Cedratvirus_kamchatka.fasta	MN873693.1	Cedratvirus_kamchatka	77998	90363
Nucleocytoviricota	Cedratvirus_kamchatka.fasta	MN873693.1	Cedratvirus_kamchatka	90696	109793
Nucleocytoviricota	Cedratvirus_kamchatka.fasta	MN873693.1	Cedratvirus_kamchatka	110126	136847
Nucleocytoviricota	Cedratvirus_kamchatka.fasta	MN873693.1	Cedratvirus_kamchatka	137180	150180
Nucleocytoviricota	Cedratvirus_kamchatka.fasta	MN873693.1	Cedratvirus_kamchatka	150513	165736
Nucleocytoviricota	Cedratvirus_kamchatka.fasta	MN873693.1	Cedratvirus_kamchatka	166069	180439
Nucleocytoviricota	Cedratvirus_kamchatka.fasta	MN873693.1	Cedratvirus_kamchatka	180772	195965
Nucleocytoviricota	Cedratvirus_kamchatka.fasta	MN873693.1	Cedratvirus_kamchatka	196298	213806
Nucleocytoviricota	Cedratvirus_kamchatka.fasta	MN873693.1	Cedratvirus_kamchatka	214139	224356
Nucleocytoviricota	Cedratvirus_kamchatka.fasta	MN873693.1	Cedratvirus_kamchatka	224689	249479
Nucleocytoviricota	Cedratvirus_kamchatka.fasta	MN873693.1	Cedratvirus_kamchatka	249812	265441
Nucleocytoviricota	Cedratvirus_kamchatka.fasta	MN873693.1	Cedratvirus_kamchatka	265774	277389
Nucleocytoviricota	Cedratvirus_kamchatka.fasta	MN873693.1	Cedratvirus_kamchatka	277722	294719
Nucleocytoviricota	Cedratvirus_kamchatka.fasta	MN873693.1	Cedratvirus_kamchatka	295052	312734
Nucleocytoviricota	Cedratvirus_kamchatka.fasta	MN873693.1	Cedratvirus_kamchatka	313067	324290
Nucleocytoviricota	Cedratvirus_kamchatka.fasta	MN873693.1	Cedratvirus_kamchatka	324623	344532
Nucleocytoviricota	Cedratvirus_kamchatka.fasta	MN873693.1	Cedratvirus_kamchatka	344865	359122
Nucleocytoviricota	Cedratvirus_kamchatka.fasta	MN873693.1	Cedratvirus_kamchatka	359455	393122
Nucleocytoviricota	Cedratvirus_kamchatka.fasta	MN873693.1	Cedratvirus_kamchatka	393455	410796
Nucleocytoviricota	Cedratvirus_kamchatka.fasta	MN873693.1	Cedratvirus_kamchatka	411129	421819
Nucleocytoviricota	Cedratvirus_kamchatka.fasta	MN873693.1	Cedratvirus_kamchatka	422152	435265
Nucleocytoviricota	Cedratvirus_kamchatka.fasta	MN873693.1	Cedratvirus_kamchatka	435598	449152
Nucleocytoviricota	Cedratvirus_kamchatka.fasta	MN873693.1	Cedratvirus_kamchatka	449485	466422
Nucleocytoviricota	Chrysochromulina_ericina_virus.fasta	NC_028094.1	Chrysochromulina_ericina_virus	1	12896
Nucleocytoviricota	Chrysochromulina_ericina_virus.fasta	NC_028094.1	Chrysochromulina_ericina_virus	14447	30364
Nucleocytoviricota	Chrysochromulina_ericina_virus.fasta	NC_028094.1	Chrysochromulina_ericina_virus	31915	71980
Nucleocytoviricota	Chrysochromulina_ericina_virus.fasta	NC_028094.1	Chrysochromulina_ericina_virus	73531	85906
Nucleocytoviricota	Chrysochromulina_ericina_virus.fasta	NC_028094.1	Chrysochromulina_ericina_virus	87457	98122
Nucleocytoviricota	Chrysochromulina_ericina_virus.fasta	NC_028094.1	Chrysochromulina_ericina_virus	99673	113983
Nucleocytoviricota	Chrysochromulina_ericina_virus.fasta	NC_028094.1	Chrysochromulina_ericina_virus	115534	130161
Nucleocytoviricota	Chrysochromulina_ericina_virus.fasta	NC_028094.1	Chrysochromulina_ericina_virus	131712	149638
Nucleocytoviricota	Chrysochromulina_ericina_virus.fasta	NC_028094.1	Chrysochromulina_ericina_virus	151189	167006
Nucleocytoviricota	Chrysochromulina_ericina_virus.fasta	NC_028094.1	Chrysochromulina_ericina_virus	168557	198708
Nucleocytoviricota	Chrysochromulina_ericina_virus.fasta	NC_028094.1	Chrysochromulina_ericina_virus	200259	214194
Nucleocytoviricota	Chrysochromulina_ericina_virus.fasta	NC_028094.1	Chrysochromulina_ericina_virus	215745	237170
Nucleocytoviricota	Chrysochromulina_ericina_virus.fasta	NC_028094.1	Chrysochromulina_ericina_virus	238721	262171
Nucleocytoviricota	Chrysochromulina_ericina_virus.fasta	NC_028094.1	Chrysochromulina_ericina_virus	263722	277537
Nucleocytoviricota	Chrysochromulina_ericina_virus.fasta	NC_028094.1	Chrysochromulina_ericina_virus	279088	289172
Nucleocytoviricota	Chrysochromulina_ericina_virus.fasta	NC_028094.1	Chrysochromulina_ericina_virus	290723	307348
Nucleocytoviricota	Chrysochromulina_ericina_virus.fasta	NC_028094.1	Chrysochromulina_ericina_virus	308899	357035
Nucleocytoviricota	Chrysochromulina_ericina_virus.fasta	NC_028094.1	Chrysochromulina_ericina_virus	358586	369288
Nucleocytoviricota	Chrysochromulina_ericina_virus.fasta	NC_028094.1	Chrysochromulina_ericina_virus	370839	382947
Nucleocytoviricota	Chrysochromulina_ericina_virus.fasta	NC_028094.1	Chrysochromulina_ericina_virus	384498	394914
Nucleocytoviricota	Chrysochromulina_ericina_virus.fasta	NC_028094.1	Chrysochromulina_ericina_virus	396465	409100
Nucleocytoviricota	Chrysochromulina_ericina_virus.fasta	NC_028094.1	Chrysochromulina_ericina_virus	410651	427685
Nucleocytoviricota	Chrysochromulina_ericina_virus.fasta	NC_028094.1	Chrysochromulina_ericina_virus	429236	472006
Nucleocytoviricota	Diadromus_pulchellus_ascovirus_4a.fasta	NC_011335.1	Diadromus_pulchellus_ascovirus_4a	1	13916
Nucleocytoviricota	Diadromus_pulchellus_ascovirus_4a.fasta	NC_011335.1	Diadromus_pulchellus_ascovirus_4a	14660	46756
Nucleocytoviricota	Diadromus_pulchellus_ascovirus_4a.fasta	NC_011335.1	Diadromus_pulchellus_ascovirus_4a	47500	57776
Nucleocytoviricota	Diadromus_pulchellus_ascovirus_4a.fasta	NC_011335.1	Diadromus_pulchellus_ascovirus_4a	58520	118597
Nucleocytoviricota	Ectocarpus_siliculosus_virus.fasta	NC_002687.1	Ectocarpus_siliculosus_virus	1	16507
Nucleocytoviricota	Ectocarpus_siliculosus_virus.fasta	NC_002687.1	Ectocarpus_siliculosus_virus	35924	62738
Nucleocytoviricota	Ectocarpus_siliculosus_virus.fasta	NC_002687.1	Ectocarpus_siliculosus_virus	82155	95034
Nucleocytoviricota	Ectocarpus_siliculosus_virus.fasta	NC_002687.1	Ectocarpus_siliculosus_virus	114451	136603
Nucleocytoviricota	Ectocarpus_siliculosus_virus.fasta	NC_002687.1	Ectocarpus_siliculosus_virus	156020	167042
Nucleocytoviricota	Ectocarpus_siliculosus_virus.fasta	NC_002687.1	Ectocarpus_siliculosus_virus	186459	198561
Nucleocytoviricota	Ectocarpus_siliculosus_virus.fasta	NC_002687.1	Ectocarpus_siliculosus_virus	217978	234806
Nucleocytoviricota	Ectocarpus_siliculosus_virus.fasta	NC_002687.1	Ectocarpus_siliculosus_virus	254223	273828
Nucleocytoviricota	Ectocarpus_siliculosus_virus.fasta	NC_002687.1	Ectocarpus_siliculosus_virus	293245	316175
Nucleocytoviricota	Emiliania_huxleyi_virus_86.fasta	NC_007346.1	Emiliania_huxleyi_virus_86	1	14118
Nucleocytoviricota	Emiliania_huxleyi_virus_86.fasta	NC_007346.1	Emiliania_huxleyi_virus_86	14482	32244
Nucleocytoviricota	Emiliania_huxleyi_virus_86.fasta	NC_007346.1	Emiliania_huxleyi_virus_86	32608	43856
Nucleocytoviricota	Emiliania_huxleyi_virus_86.fasta	NC_007346.1	Emiliania_huxleyi_virus_86	44220	57904
Nucleocytoviricota	Emiliania_huxleyi_virus_86.fasta	NC_007346.1	Emiliania_huxleyi_virus_86	58268	75803
Nucleocytoviricota	Emiliania_huxleyi_virus_86.fasta	NC_007346.1	Emiliania_huxleyi_virus_86	76167	90101
Nucleocytoviricota	Emiliania_huxleyi_virus_86.fasta	NC_007346.1	Emiliania_huxleyi_virus_86	90465	111393
Nucleocytoviricota	Emiliania_huxleyi_virus_86.fasta	NC_007346.1	Emiliania_huxleyi_virus_86	111757	123802
Nucleocytoviricota	Emiliania_huxleyi_virus_86.fasta	NC_007346.1	Emiliania_huxleyi_virus_86	124166	134540
Nucleocytoviricota	Emiliania_huxleyi_virus_86.fasta	NC_007346.1	Emiliania_huxleyi_virus_86	134904	175771
Nucleocytoviricota	Emiliania_huxleyi_virus_86.fasta	NC_007346.1	Emiliania_huxleyi_virus_86	176135	189888
Nucleocytoviricota	Emiliania_huxleyi_virus_86.fasta	NC_007346.1	Emiliania_huxleyi_virus_86	190252	203494
Nucleocytoviricota	Emiliania_huxleyi_virus_86.fasta	NC_007346.1	Emiliania_huxleyi_virus_86	203858	219747
Nucleocytoviricota	Emiliania_huxleyi_virus_86.fasta	NC_007346.1	Emiliania_huxleyi_virus_86	220111	231444
Nucleocytoviricota	Emiliania_huxleyi_virus_86.fasta	NC_007346.1	Emiliania_huxleyi_virus_86	231808	246372
Nucleocytoviricota	Emiliania_huxleyi_virus_86.fasta	NC_007346.1	Emiliania_huxleyi_virus_86	246736	281608
Nucleocytoviricota	Emiliania_huxleyi_virus_86.fasta	NC_007346.1	Emiliania_huxleyi_virus_86	281972	316266
Nucleocytoviricota	Emiliania_huxleyi_virus_86.fasta	NC_007346.1	Emiliania_huxleyi_virus_86	316630	331629
Nucleocytoviricota	Emiliania_huxleyi_virus_86.fasta	NC_007346.1	Emiliania_huxleyi_virus_86	331993	346723
Nucleocytoviricota	Emiliania_huxleyi_virus_86.fasta	NC_007346.1	Emiliania_huxleyi_virus_86	347087	406969
Nucleocytoviricota	Faustovirus.fasta	KJ614390.1	Faustovirus	1	13119
Nucleocytoviricota	Faustovirus.fasta	KJ614390.1	Faustovirus	13684	26345
Nucleocytoviricota	Faustovirus.fasta	KJ614390.1	Faustovirus	26910	46576
Nucleocytoviricota	Faustovirus.fasta	KJ614390.1	Faustovirus	47141	91727
Nucleocytoviricota	Faustovirus.fasta	KJ614390.1	Faustovirus	92292	119145
Nucleocytoviricota	Faustovirus.fasta	KJ614390.1	Faustovirus	119710	167166
Nucleocytoviricota	Faustovirus.fasta	KJ614390.1	Faustovirus	167731	202531
Nucleocytoviricota	Faustovirus.fasta	KJ614390.1	Faustovirus	203096	215611
Nucleocytoviricota	Faustovirus.fasta	KJ614390.1	Faustovirus	216176	226196
Nucleocytoviricota	Faustovirus.fasta	KJ614390.1	Faustovirus	226761	238787
Nucleocytoviricota	Faustovirus.fasta	KJ614390.1	Faustovirus	239352	257058
Nucleocytoviricota	Faustovirus.fasta	KJ614390.1	Faustovirus	257623	279123
Nucleocytoviricota	Faustovirus.fasta	KJ614390.1	Faustovirus	279688	319593
Nucleocytoviricota	Faustovirus.fasta	KJ614390.1	Faustovirus	320158	334492
Nucleocytoviricota	Faustovirus.fasta	KJ614390.1	Faustovirus	335057	352030
Nucleocytoviricota	Faustovirus.fasta	KJ614390.1	Faustovirus	352595	364238
Nucleocytoviricota	Faustovirus.fasta	KJ614390.1	Faustovirus	364803	379910
Nucleocytoviricota	Faustovirus.fasta	KJ614390.1	Faustovirus	380475	393199
Nucleocytoviricota	Faustovirus.fasta	KJ614390.1	Faustovirus	393764	410980
Nucleocytoviricota	Faustovirus.fasta	KJ614390.1	Faustovirus	411545	423270
Nucleocytoviricota	Faustovirus.fasta	KJ614390.1	Faustovirus	423835	436857
Nucleocytoviricota	Faustovirus.fasta	KJ614390.1	Faustovirus	437422	465694
Nucleocytoviricota	Feldmannia_species_virus.fasta	NC_011183.1	Feldmannia_species_virus	1	27885
Nucleocytoviricota	Feldmannia_species_virus.fasta	NC_011183.1	Feldmannia_species_virus	36361	49861
Nucleocytoviricota	Feldmannia_species_virus.fasta	NC_011183.1	Feldmannia_species_virus	58337	70222
Nucleocytoviricota	Feldmannia_species_virus.fasta	NC_011183.1	Feldmannia_species_virus	78698	97952
Nucleocytoviricota	Feldmannia_species_virus.fasta	NC_011183.1	Feldmannia_species_virus	106428	127335
Nucleocytoviricota	Feldmannia_species_virus.fasta	NC_011183.1	Feldmannia_species_virus	135811	146167
Nucleocytoviricota	Frog_virus_3.fasta	NC_005946.1	Frog_virus_3	1	12031
Nucleocytoviricota	Frog_virus_3.fasta	NC_005946.1	Frog_virus_3	15186	41180
Nucleocytoviricota	Frog_virus_3.fasta	NC_005946.1	Frog_virus_3	44335	62129
Nucleocytoviricota	Frog_virus_3.fasta	NC_005946.1	Frog_virus_3	65284	83276
Nucleocytoviricota	Frog_virus_3.fasta	NC_005946.1	Frog_virus_3	86431	102750
Nucleocytoviricota	Grouper_iridovirus.fasta	AY666015.1	Grouper_iridovirus	1	12897
Nucleocytoviricota	Grouper_iridovirus.fasta	AY666015.1	Grouper_iridovirus	15933	26910
Nucleocytoviricota	Grouper_iridovirus.fasta	AY666015.1	Grouper_iridovirus	29946	52599
Nucleocytoviricota	Grouper_iridovirus.fasta	AY666015.1	Grouper_iridovirus	55635	79523
Nucleocytoviricota	Grouper_iridovirus.fasta	AY666015.1	Grouper_iridovirus	82559	92973
Nucleocytoviricota	Grouper_iridovirus.fasta	AY666015.1	Grouper_iridovirus	96009	136759
Nucleocytoviricota	Heliothis_virescens_ascovirus_3e.fasta	NC_009233.1	Heliothis_virescens_ascovirus_3e	1	164104
Nucleocytoviricota	Heterosigma_akashiwo_virus_01_isolate_HaV53.fasta	KX008963.1	Heterosigma_akashiwo_virus_01_isolate_HaV53	1	17649
Nucleocytoviricota	Heterosigma_akashiwo_virus_01_isolate_HaV53.fasta	KX008963.1	Heterosigma_akashiwo_virus_01_isolate_HaV53	18945	52863
Nucleocytoviricota	Heterosigma_akashiwo_virus_01_isolate_HaV53.fasta	KX008963.1	Heterosigma_akashiwo_virus_01_isolate_HaV53	54159	64539
Nucleocytoviricota	Heterosigma_akashiwo_virus_01_isolate_HaV53.fasta	KX008963.1	Heterosigma_akashiwo_virus_01_isolate_HaV53	65835	78169
Nucleocytoviricota	Heterosigma_akashiwo_virus_01_isolate_HaV53.fasta	KX008963.1	Heterosigma_akashiwo_virus_01_isolate_HaV53	79465	94964
Nucleocytoviricota	Heterosigma_akashiwo_virus_01_isolate_HaV53.fasta	KX008963.1	Heterosigma_akashiwo_virus_01_isolate_HaV53	96260	129526
Nucleocytoviricota	Heterosigma_akashiwo_virus_01_isolate_HaV53.fasta	KX008963.1	Heterosigma_akashiwo_virus_01_isolate_HaV53	130822	141259
Nucleocytoviricota	Heterosigma_akashiwo_virus_01_isolate_HaV53.fasta	KX008963.1	Heterosigma_akashiwo_virus_01_isolate_HaV53	142555	193398
Nucleocytoviricota	Heterosigma_akashiwo_virus_01_isolate_HaV53.fasta	KX008963.1	Heterosigma_akashiwo_virus_01_isolate_HaV53	194694	236113
Nucleocytoviricota	Heterosigma_akashiwo_virus_01_isolate_HaV53.fasta	KX008963.1	Heterosigma_akashiwo_virus_01_isolate_HaV53	237409	251640
Nucleocytoviricota	Heterosigma_akashiwo_virus_01_isolate_HaV53.fasta	KX008963.1	Heterosigma_akashiwo_virus_01_isolate_HaV53	252936	273493
Nucleocytoviricota	Hokovirus.fasta_1	KY684103.1	Hokovirus_1	1	14207
Nucleocytoviricota	Hokovirus.fasta_1	KY684103.1	Hokovirus_1	14210	33514
Nucleocytoviricota	Hokovirus.fasta_1	KY684103.1	Hokovirus_1	33517	44999
Nucleocytoviricota	Hokovirus.fasta_1	KY684103.1	Hokovirus_1	45002	58402
Nucleocytoviricota	Hokovirus.fasta_1	KY684103.1	Hokovirus_1	58405	74698
Nucleocytoviricota	Hokovirus.fasta_1	KY684103.1	Hokovirus_1	74701	85292
Nucleocytoviricota	Hokovirus.fasta_1	KY684103.1	Hokovirus_1	85295	198944
Nucleocytoviricota	Hokovirus.fasta_1	KY684103.1	Hokovirus_1	198947	218607
Nucleocytoviricota	Hokovirus.fasta_1	KY684103.1	Hokovirus_1	218610	229814
Nucleocytoviricota	Hokovirus.fasta_1	KY684103.1	Hokovirus_1	229817	245331
Nucleocytoviricota	Hokovirus.fasta_1	KY684103.1	Hokovirus_1	245334	255785
Nucleocytoviricota	Hokovirus.fasta_1	KY684103.1	Hokovirus_1	255788	266702
Nucleocytoviricota	Hokovirus.fasta_1	KY684103.1	Hokovirus_1	266705	286485
Nucleocytoviricota	Hokovirus.fasta_1	KY684103.1	Hokovirus_1	286488	299250
Nucleocytoviricota	Hokovirus.fasta_1	KY684103.1	Hokovirus_1	299253	391445
Nucleocytoviricota	Hokovirus.fasta_1	KY684103.1	Hokovirus_1	391448	406936
Nucleocytoviricota	Hokovirus.fasta_1	KY684103.1	Hokovirus_1	406939	429472
Nucleocytoviricota	Hokovirus.fasta_1	KY684103.1	Hokovirus_1	429475	440545
Nucleocytoviricota	Hokovirus.fasta_1	KY684103.1	Hokovirus_1	440548	450686
Nucleocytoviricota	Hokovirus.fasta_2	KY684104.1	Hokovirus_2	1	12649
Nucleocytoviricota	Hokovirus.fasta_2	KY684104.1	Hokovirus_2	12749	26499
Nucleocytoviricota	Hokovirus.fasta_2	KY684104.1	Hokovirus_2	26599	39837
Nucleocytoviricota	Hokovirus.fasta_2	KY684104.1	Hokovirus_2	39937	71719
Nucleocytoviricota	Hokovirus.fasta_2	KY684104.1	Hokovirus_2	71819	83345
Nucleocytoviricota	Hokovirus.fasta_2	KY684104.1	Hokovirus_2	83445	95626
Nucleocytoviricota	Hokovirus.fasta_2	KY684104.1	Hokovirus_2	95726	109189
Nucleocytoviricota	Hokovirus.fasta_2	KY684104.1	Hokovirus_2	109289	128066
Nucleocytoviricota	Hokovirus.fasta_2	KY684104.1	Hokovirus_2	128166	138784
Nucleocytoviricota	Hokovirus.fasta_2	KY684104.1	Hokovirus_2	138884	154906
Nucleocytoviricota	Hokovirus.fasta_2	KY684104.1	Hokovirus_2	155006	178945
Nucleocytoviricota	Hokovirus.fasta_2	KY684104.1	Hokovirus_2	179045	190325
Nucleocytoviricota	Hokovirus.fasta_2	KY684104.1	Hokovirus_2	190425	224668
Nucleocytoviricota	Hokovirus.fasta_2	KY684104.1	Hokovirus_2	224768	235345
Nucleocytoviricota	Hokovirus.fasta_2	KY684104.1	Hokovirus_2	235445	292985
Nucleocytoviricota	Hokovirus.fasta_2	KY684104.1	Hokovirus_2	293085	305999
Nucleocytoviricota	Hokovirus.fasta_2	KY684104.1	Hokovirus_2	306099	317184
Nucleocytoviricota	Hokovirus.fasta_3	KY684105.1	Hokovirus_3	1	23221
Nucleocytoviricota	Hokovirus.fasta_3	KY684105.1	Hokovirus_3	23828	33920
Nucleocytoviricota	Hokovirus.fasta_3	KY684105.1	Hokovirus_3	34527	46141
Nucleocytoviricota	Hokovirus.fasta_3	KY684105.1	Hokovirus_3	46748	66539
Nucleocytoviricota	Hokovirus.fasta_3	KY684105.1	Hokovirus_3	67146	114620
Nucleocytoviricota	Hokovirus.fasta_3	KY684105.1	Hokovirus_3	115227	127893
Nucleocytoviricota	Hokovirus.fasta_3	KY684105.1	Hokovirus_3	128500	140548
Nucleocytoviricota	Hokovirus.fasta_3	KY684105.1	Hokovirus_3	141155	154633
Nucleocytoviricota	Hokovirus.fasta_3	KY684105.1	Hokovirus_3	155240	165312
Nucleocytoviricota	Hokovirus.fasta_3	KY684105.1	Hokovirus_3	165919	176618
Nucleocytoviricota	Hokovirus.fasta_3	KY684105.1	Hokovirus_3	177225	196211
Nucleocytoviricota	Hokovirus.fasta_3	KY684105.1	Hokovirus_3	196818	214572
Nucleocytoviricota	Hokovirus.fasta_3	KY684105.1	Hokovirus_3	215179	246897
Nucleocytoviricota	Hokovirus.fasta_3	KY684105.1	Hokovirus_3	247504	278421
Nucleocytoviricota	Hokovirus.fasta_3	KY684105.1	Hokovirus_3	279028	294463
Nucleocytoviricota	Hokovirus.fasta_3	KY684105.1	Hokovirus_3	295070	330540
Nucleocytoviricota	Hokovirus.fasta_3	KY684105.1	Hokovirus_3	331147	361916
Nucleocytoviricota	Hokovirus.fasta_3	KY684105.1	Hokovirus_3	362523	376564
Nucleocytoviricota	Hokovirus.fasta_3	KY684105.1	Hokovirus_3	377171	407327
Nucleocytoviricota	Hokovirus.fasta_4	KY684106.1	Hokovirus_4	1	12142
Nucleocytoviricota	Hokovirus.fasta_4	KY684106.1	Hokovirus_4	14945	27796
Nucleocytoviricota	Hokovirus.fasta_4	KY684106.1	Hokovirus_4	30599	43667
Nucleocytoviricota	Hokovirus.fasta_4	KY684106.1	Hokovirus_4	46470	56787
Nucleocytoviricota	Hokovirus.fasta_4	KY684106.1	Hokovirus_4	59590	79994
Nucleocytoviricota	Hokovirus.fasta_4	KY684106.1	Hokovirus_4	82797	103796
Nucleocytoviricota	Hokovirus.fasta_4	KY684106.1	Hokovirus_4	106599	117663
Nucleocytoviricota	Indivirus.fasta_11	KY684092.1	Indivirus_11	1	11739
Nucleocytoviricota	Indivirus.fasta_12	KY684091.1	Indivirus_12	1	11160
Nucleocytoviricota	Indivirus.fasta_13	KY684090.1	Indivirus_13	1	27643
Nucleocytoviricota	Indivirus.fasta_13	KY684090.1	Indivirus_13	28391	38804
Nucleocytoviricota	Indivirus.fasta_13	KY684090.1	Indivirus_13	39552	51511
Nucleocytoviricota	Indivirus.fasta_14	KY684089.1	Indivirus_14	1	10492
Nucleocytoviricota	Indivirus.fasta_14	KY684089.1	Indivirus_14	15263	33717
Nucleocytoviricota	Indivirus.fasta_14	KY684089.1	Indivirus_14	38488	50987
Nucleocytoviricota	Indivirus.fasta_15	KY684088.1	Indivirus_15	1	12915
Nucleocytoviricota	Indivirus.fasta_15	KY684088.1	Indivirus_15	13834	45247
Nucleocytoviricota	Indivirus.fasta_15	KY684088.1	Indivirus_15	46166	56180
Nucleocytoviricota	Indivirus.fasta_16	KY684087.1	Indivirus_16	1	10518
Nucleocytoviricota	Indivirus.fasta_16	KY684087.1	Indivirus_16	11584	21912
Nucleocytoviricota	Indivirus.fasta_16	KY684087.1	Indivirus_16	22978	35021
Nucleocytoviricota	Indivirus.fasta_16	KY684087.1	Indivirus_16	36087	50562
Nucleocytoviricota	Indivirus.fasta_16	KY684087.1	Indivirus_16	51628	82013
Nucleocytoviricota	Indivirus.fasta_16	KY684087.1	Indivirus_16	83079	99803
Nucleocytoviricota	Indivirus.fasta_16	KY684087.1	Indivirus_16	100869	120173
Nucleocytoviricota	Indivirus.fasta_17	KY684086.1	Indivirus_17	1	99733
Nucleocytoviricota	Indivirus.fasta_17	KY684086.1	Indivirus_17	106753	123685
Nucleocytoviricota	Indivirus.fasta_17	KY684086.1	Indivirus_17	130705	140831
Nucleocytoviricota	Indivirus.fasta_18	KY684085.1	Indivirus_18	1	22845
Nucleocytoviricota	Indivirus.fasta_18	KY684085.1	Indivirus_18	25253	36477
Nucleocytoviricota	Indivirus.fasta_18	KY684085.1	Indivirus_18	38885	49976
Nucleocytoviricota	Indivirus.fasta_18	KY684085.1	Indivirus_18	52384	75276
Nucleocytoviricota	Indivirus.fasta_18	KY684085.1	Indivirus_18	77684	89876
Nucleocytoviricota	Indivirus.fasta_18	KY684085.1	Indivirus_18	92284	225019
Nucleocytoviricota	Indivirus.fasta_18	KY684085.1	Indivirus_18	227427	244508
Nucleocytoviricota	Indivirus.fasta_18	KY684085.1	Indivirus_18	246916	264853
Nucleocytoviricota	Indivirus.fasta_7	KY684096.1	Indivirus_7	1	11754
Nucleocytoviricota	Indivirus.fasta_9	KY684094.1	Indivirus_9	1	11955
Nucleocytoviricota	Invertebrate_iridescent_virus_30.fasta	NC_023611.1	Invertebrate_iridescent_virus_30	1	29888
Nucleocytoviricota	Invertebrate_iridescent_virus_30.fasta	NC_023611.1	Invertebrate_iridescent_virus_30	30137	40471
Nucleocytoviricota	Invertebrate_iridescent_virus_30.fasta	NC_023611.1	Invertebrate_iridescent_virus_30	40720	51172
Nucleocytoviricota	Invertebrate_iridescent_virus_30.fasta	NC_023611.1	Invertebrate_iridescent_virus_30	51421	62142
Nucleocytoviricota	Invertebrate_iridescent_virus_30.fasta	NC_023611.1	Invertebrate_iridescent_virus_30	62391	75562
Nucleocytoviricota	Invertebrate_iridescent_virus_30.fasta	NC_023611.1	Invertebrate_iridescent_virus_30	75811	110105
Nucleocytoviricota	Invertebrate_iridescent_virus_30.fasta	NC_023611.1	Invertebrate_iridescent_virus_30	110354	120435
Nucleocytoviricota	Invertebrate_iridescent_virus_30.fasta	NC_023611.1	Invertebrate_iridescent_virus_30	120684	131769
Nucleocytoviricota	Invertebrate_iridescent_virus_30.fasta	NC_023611.1	Invertebrate_iridescent_virus_30	132018	144497
Nucleocytoviricota	Invertebrate_iridescent_virus_30.fasta	NC_023611.1	Invertebrate_iridescent_virus_30	144746	158403
Nucleocytoviricota	Invertebrate_iridescent_virus_30.fasta	NC_023611.1	Invertebrate_iridescent_virus_30	158652	170436
Nucleocytoviricota	Invertebrate_iridescent_virus_30.fasta	NC_023611.1	Invertebrate_iridescent_virus_30	170685	181260
Nucleocytoviricota	Invertebrate_iridescent_virus_30.fasta	NC_023611.1	Invertebrate_iridescent_virus_30	181509	198278
Nucleocytoviricota	Invertebrate_iridescent_virus_3.fasta	NC_008187.1	Invertebrate_iridescent_virus_3	1	18493
Nucleocytoviricota	Invertebrate_iridescent_virus_3.fasta	NC_008187.1	Invertebrate_iridescent_virus_3	19000	58733
Nucleocytoviricota	Invertebrate_iridescent_virus_3.fasta	NC_008187.1	Invertebrate_iridescent_virus_3	59240	82943
Nucleocytoviricota	Invertebrate_iridescent_virus_3.fasta	NC_008187.1	Invertebrate_iridescent_virus_3	83450	93596
Nucleocytoviricota	Invertebrate_iridescent_virus_3.fasta	NC_008187.1	Invertebrate_iridescent_virus_3	94103	111647
Nucleocytoviricota	Invertebrate_iridescent_virus_3.fasta	NC_008187.1	Invertebrate_iridescent_virus_3	112154	144744
Nucleocytoviricota	Invertebrate_iridescent_virus_3.fasta	NC_008187.1	Invertebrate_iridescent_virus_3	145251	163241
Nucleocytoviricota	Invertebrate_iridescent_virus_3.fasta	NC_008187.1	Invertebrate_iridescent_virus_3	163748	174139
Nucleocytoviricota	Invertebrate_iridescent_virus_3.fasta	NC_008187.1	Invertebrate_iridescent_virus_3	174646	190591
Nucleocytoviricota	Invertebrate_iridescent_virus_6.fasta	NC_003038.1	Invertebrate_iridescent_virus_6	1	16080
Nucleocytoviricota	Invertebrate_iridescent_virus_6.fasta	NC_003038.1	Invertebrate_iridescent_virus_6	17283	90427
Nucleocytoviricota	Invertebrate_iridescent_virus_6.fasta	NC_003038.1	Invertebrate_iridescent_virus_6	91630	103232
Nucleocytoviricota	Invertebrate_iridescent_virus_6.fasta	NC_003038.1	Invertebrate_iridescent_virus_6	104435	159314
Nucleocytoviricota	Invertebrate_iridescent_virus_6.fasta	NC_003038.1	Invertebrate_iridescent_virus_6	160517	190075
Nucleocytoviricota	Invertebrate_iridescent_virus_6.fasta	NC_003038.1	Invertebrate_iridescent_virus_6	191278	211277
Nucleocytoviricota	Kaumoebavirus.fasta	NC_034249.1	Kaumoebavirus	1	10423
Nucleocytoviricota	Kaumoebavirus.fasta	NC_034249.1	Kaumoebavirus	10833	58050
Nucleocytoviricota	Kaumoebavirus.fasta	NC_034249.1	Kaumoebavirus	58460	70325
Nucleocytoviricota	Kaumoebavirus.fasta	NC_034249.1	Kaumoebavirus	70735	84671
Nucleocytoviricota	Kaumoebavirus.fasta	NC_034249.1	Kaumoebavirus	85081	95191
Nucleocytoviricota	Kaumoebavirus.fasta	NC_034249.1	Kaumoebavirus	95601	112749
Nucleocytoviricota	Kaumoebavirus.fasta	NC_034249.1	Kaumoebavirus	113159	123725
Nucleocytoviricota	Kaumoebavirus.fasta	NC_034249.1	Kaumoebavirus	124135	139032
Nucleocytoviricota	Kaumoebavirus.fasta	NC_034249.1	Kaumoebavirus	139442	152303
Nucleocytoviricota	Kaumoebavirus.fasta	NC_034249.1	Kaumoebavirus	152713	166584
Nucleocytoviricota	Kaumoebavirus.fasta	NC_034249.1	Kaumoebavirus	166994	178040
Nucleocytoviricota	Kaumoebavirus.fasta	NC_034249.1	Kaumoebavirus	178450	195639
Nucleocytoviricota	Kaumoebavirus.fasta	NC_034249.1	Kaumoebavirus	196049	207085
Nucleocytoviricota	Kaumoebavirus.fasta	NC_034249.1	Kaumoebavirus	207495	220147
Nucleocytoviricota	Kaumoebavirus.fasta	NC_034249.1	Kaumoebavirus	220557	242899
Nucleocytoviricota	Kaumoebavirus.fasta	NC_034249.1	Kaumoebavirus	243309	256868
Nucleocytoviricota	Kaumoebavirus.fasta	NC_034249.1	Kaumoebavirus	257278	267334
Nucleocytoviricota	Kaumoebavirus.fasta	NC_034249.1	Kaumoebavirus	267744	279934
Nucleocytoviricota	Kaumoebavirus.fasta	NC_034249.1	Kaumoebavirus	280344	295226
Nucleocytoviricota	Kaumoebavirus.fasta	NC_034249.1	Kaumoebavirus	295636	307017
Nucleocytoviricota	Kaumoebavirus.fasta	NC_034249.1	Kaumoebavirus	307427	322577
Nucleocytoviricota	Kaumoebavirus.fasta	NC_034249.1	Kaumoebavirus	322987	339211
Nucleocytoviricota	Kaumoebavirus.fasta	NC_034249.1	Kaumoebavirus	339621	350327
Nucleocytoviricota	Klosneuvirus.fasta_10	KY684114.1	Klosneuvirus_10	1	19176
Nucleocytoviricota	Klosneuvirus.fasta_10	KY684114.1	Klosneuvirus_10	22812	32959
Nucleocytoviricota	Klosneuvirus.fasta_11	KY684113.1	Klosneuvirus_11	1	10070
Nucleocytoviricota	Klosneuvirus.fasta_11	KY684113.1	Klosneuvirus_11	10449	44012
Nucleocytoviricota	Klosneuvirus.fasta_11	KY684113.1	Klosneuvirus_11	44391	56649
Nucleocytoviricota	Klosneuvirus.fasta_11	KY684113.1	Klosneuvirus_11	57028	69053
Nucleocytoviricota	Klosneuvirus.fasta_11	KY684113.1	Klosneuvirus_11	69432	80433
Nucleocytoviricota	Klosneuvirus.fasta_11	KY684113.1	Klosneuvirus_11	80812	99298
Nucleocytoviricota	Klosneuvirus.fasta_12	KY684112.1	Klosneuvirus_12	1	15965
Nucleocytoviricota	Klosneuvirus.fasta_12	KY684112.1	Klosneuvirus_12	16851	28011
Nucleocytoviricota	Klosneuvirus.fasta_12	KY684112.1	Klosneuvirus_12	28897	41049
Nucleocytoviricota	Klosneuvirus.fasta_12	KY684112.1	Klosneuvirus_12	41935	58453
Nucleocytoviricota	Klosneuvirus.fasta_12	KY684112.1	Klosneuvirus_12	59339	74996
Nucleocytoviricota	Klosneuvirus.fasta_12	KY684112.1	Klosneuvirus_12	75882	104142
Nucleocytoviricota	Klosneuvirus.fasta_13	KY684111.1	Klosneuvirus_13	1	16235
Nucleocytoviricota	Klosneuvirus.fasta_13	KY684111.1	Klosneuvirus_13	19971	35757
Nucleocytoviricota	Klosneuvirus.fasta_13	KY684111.1	Klosneuvirus_13	39493	51124
Nucleocytoviricota	Klosneuvirus.fasta_13	KY684111.1	Klosneuvirus_13	54860	66660
Nucleocytoviricota	Klosneuvirus.fasta_13	KY684111.1	Klosneuvirus_13	70396	86954
Nucleocytoviricota	Klosneuvirus.fasta_13	KY684111.1	Klosneuvirus_13	90690	109034
Nucleocytoviricota	Klosneuvirus.fasta_13	KY684111.1	Klosneuvirus_13	112770	128214
Nucleocytoviricota	Klosneuvirus.fasta_14	KY684110.1	Klosneuvirus_14	1	12655
Nucleocytoviricota	Klosneuvirus.fasta_14	KY684110.1	Klosneuvirus_14	13028	33005
Nucleocytoviricota	Klosneuvirus.fasta_14	KY684110.1	Klosneuvirus_14	33378	43548
Nucleocytoviricota	Klosneuvirus.fasta_14	KY684110.1	Klosneuvirus_14	43921	60564
Nucleocytoviricota	Klosneuvirus.fasta_14	KY684110.1	Klosneuvirus_14	60937	103633
Nucleocytoviricota	Klosneuvirus.fasta_14	KY684110.1	Klosneuvirus_14	104006	126185
Nucleocytoviricota	Klosneuvirus.fasta_14	KY684110.1	Klosneuvirus_14	126558	147762
Nucleocytoviricota	Klosneuvirus.fasta_14	KY684110.1	Klosneuvirus_14	148135	159649
Nucleocytoviricota	Klosneuvirus.fasta_14	KY684110.1	Klosneuvirus_14	160022	179302
Nucleocytoviricota	Klosneuvirus.fasta_14	KY684110.1	Klosneuvirus_14	179675	192194
Nucleocytoviricota	Klosneuvirus.fasta_14	KY684110.1	Klosneuvirus_14	192567	224338
Nucleocytoviricota	Klosneuvirus.fasta_14	KY684110.1	Klosneuvirus_14	224711	235453
Nucleocytoviricota	Klosneuvirus.fasta_14	KY684110.1	Klosneuvirus_14	235826	285862
Nucleocytoviricota	Klosneuvirus.fasta_14	KY684110.1	Klosneuvirus_14	286235	297242
Nucleocytoviricota	Klosneuvirus.fasta_15	KY684109.1	Klosneuvirus_15	1	10808
Nucleocytoviricota	Klosneuvirus.fasta_15	KY684109.1	Klosneuvirus_15	11682	35630
Nucleocytoviricota	Klosneuvirus.fasta_15	KY684109.1	Klosneuvirus_15	36504	50084
Nucleocytoviricota	Klosneuvirus.fasta_15	KY684109.1	Klosneuvirus_15	50958	83391
Nucleocytoviricota	Klosneuvirus.fasta_15	KY684109.1	Klosneuvirus_15	84265	106625
Nucleocytoviricota	Klosneuvirus.fasta_15	KY684109.1	Klosneuvirus_15	107499	118268
Nucleocytoviricota	Klosneuvirus.fasta_15	KY684109.1	Klosneuvirus_15	119142	129788
Nucleocytoviricota	Klosneuvirus.fasta_15	KY684109.1	Klosneuvirus_15	130662	141264
Nucleocytoviricota	Klosneuvirus.fasta_15	KY684109.1	Klosneuvirus_15	142138	157625
Nucleocytoviricota	Klosneuvirus.fasta_15	KY684109.1	Klosneuvirus_15	158499	193340
Nucleocytoviricota	Klosneuvirus.fasta_15	KY684109.1	Klosneuvirus_15	194214	210819
Nucleocytoviricota	Klosneuvirus.fasta_15	KY684109.1	Klosneuvirus_15	211693	224250
Nucleocytoviricota	Klosneuvirus.fasta_15	KY684109.1	Klosneuvirus_15	225124	240117
Nucleocytoviricota	Klosneuvirus.fasta_15	KY684109.1	Klosneuvirus_15	240991	264777
Nucleocytoviricota	Klosneuvirus.fasta_15	KY684109.1	Klosneuvirus_15	265651	276821
Nucleocytoviricota	Klosneuvirus.fasta_15	KY684109.1	Klosneuvirus_15	277695	288377
Nucleocytoviricota	Klosneuvirus.fasta_15	KY684109.1	Klosneuvirus_15	289251	303962
Nucleocytoviricota	Klosneuvirus.fasta_15	KY684109.1	Klosneuvirus_15	304836	315057
Nucleocytoviricota	Klosneuvirus.fasta_15	KY684109.1	Klosneuvirus_15	315931	332359
Nucleocytoviricota	Klosneuvirus.fasta_16	KY684108.1	Klosneuvirus_16	1	12895
Nucleocytoviricota	Klosneuvirus.fasta_16	KY684108.1	Klosneuvirus_16	13035	220467
Nucleocytoviricota	Klosneuvirus.fasta_16	KY684108.1	Klosneuvirus_16	220607	233318
Nucleocytoviricota	Klosneuvirus.fasta_16	KY684108.1	Klosneuvirus_16	233458	245519
Nucleocytoviricota	Klosneuvirus.fasta_16	KY684108.1	Klosneuvirus_16	245659	264413
Nucleocytoviricota	Klosneuvirus.fasta_16	KY684108.1	Klosneuvirus_16	264553	283813
Nucleocytoviricota	Klosneuvirus.fasta_16	KY684108.1	Klosneuvirus_16	283953	295566
Nucleocytoviricota	Klosneuvirus.fasta_16	KY684108.1	Klosneuvirus_16	295706	321129
Nucleocytoviricota	Klosneuvirus.fasta_16	KY684108.1	Klosneuvirus_16	321269	337431
Nucleocytoviricota	Klosneuvirus.fasta_16	KY684108.1	Klosneuvirus_16	337571	347937
Nucleocytoviricota	Klosneuvirus.fasta_16	KY684108.1	Klosneuvirus_16	348077	358503
Nucleocytoviricota	Klosneuvirus.fasta_16	KY684108.1	Klosneuvirus_16	358643	370128
Nucleocytoviricota	Klosneuvirus.fasta_16	KY684108.1	Klosneuvirus_16	370268	412265
Nucleocytoviricota	Klosneuvirus.fasta_16	KY684108.1	Klosneuvirus_16	412405	424462
Nucleocytoviricota	Klosneuvirus.fasta_16	KY684108.1	Klosneuvirus_16	424602	440999
Nucleocytoviricota	Klosneuvirus.fasta_16	KY684108.1	Klosneuvirus_16	441139	451519
Nucleocytoviricota	Klosneuvirus.fasta_8	KY684116.1	Klosneuvirus_8	1	20850
Nucleocytoviricota	Klosneuvirus.fasta_9	KY684115.1	Klosneuvirus_9	1	10594
Nucleocytoviricota	Klosneuvirus.fasta_9	KY684115.1	Klosneuvirus_9	11081	24140
Nucleocytoviricota	Lymphocystis_disease_virus_1.fasta	NC_001824.1	Lymphocystis_disease_virus_1	1	11154
Nucleocytoviricota	Lymphocystis_disease_virus_1.fasta	NC_001824.1	Lymphocystis_disease_virus_1	13444	44595
Nucleocytoviricota	Lymphocystis_disease_virus_1.fasta	NC_001824.1	Lymphocystis_disease_virus_1	46885	70567
Nucleocytoviricota	Lymphocystis_disease_virus_1.fasta	NC_001824.1	Lymphocystis_disease_virus_1	72857	100363
Nucleocytoviricota	Marseillevirus_marseillevirus.fasta	NC_013756.1	Marseillevirus_marseillevirus	1	36160
Nucleocytoviricota	Marseillevirus_marseillevirus.fasta	NC_013756.1	Marseillevirus_marseillevirus	38018	66520
Nucleocytoviricota	Marseillevirus_marseillevirus.fasta	NC_013756.1	Marseillevirus_marseillevirus	68378	88840
Nucleocytoviricota	Marseillevirus_marseillevirus.fasta	NC_013756.1	Marseillevirus_marseillevirus	90698	101754
Nucleocytoviricota	Marseillevirus_marseillevirus.fasta	NC_013756.1	Marseillevirus_marseillevirus	103612	116323
Nucleocytoviricota	Marseillevirus_marseillevirus.fasta	NC_013756.1	Marseillevirus_marseillevirus	118181	128926
Nucleocytoviricota	Marseillevirus_marseillevirus.fasta	NC_013756.1	Marseillevirus_marseillevirus	130784	158177
Nucleocytoviricota	Marseillevirus_marseillevirus.fasta	NC_013756.1	Marseillevirus_marseillevirus	160035	171833
Nucleocytoviricota	Marseillevirus_marseillevirus.fasta	NC_013756.1	Marseillevirus_marseillevirus	173691	205051
Nucleocytoviricota	Marseillevirus_marseillevirus.fasta	NC_013756.1	Marseillevirus_marseillevirus	206909	221709
Nucleocytoviricota	Marseillevirus_marseillevirus.fasta	NC_013756.1	Marseillevirus_marseillevirus	223567	234380
Nucleocytoviricota	Marseillevirus_marseillevirus.fasta	NC_013756.1	Marseillevirus_marseillevirus	236238	250334
Nucleocytoviricota	Marseillevirus_marseillevirus.fasta	NC_013756.1	Marseillevirus_marseillevirus	252192	274685
Nucleocytoviricota	Marseillevirus_marseillevirus.fasta	NC_013756.1	Marseillevirus_marseillevirus	276543	350572
Nucleocytoviricota	Marseillevirus_marseillevirus.fasta	NC_013756.1	Marseillevirus_marseillevirus	352430	366590
Nucleocytoviricota	Megavirus_chiliensis.fasta	NC_016072.1	Megavirus_chiliensis	1	75043
Nucleocytoviricota	Megavirus_chiliensis.fasta	NC_016072.1	Megavirus_chiliensis	100374	118821
Nucleocytoviricota	Megavirus_chiliensis.fasta	NC_016072.1	Megavirus_chiliensis	144152	163933
Nucleocytoviricota	Megavirus_chiliensis.fasta	NC_016072.1	Megavirus_chiliensis	189264	244937
Nucleocytoviricota	Megavirus_chiliensis.fasta	NC_016072.1	Megavirus_chiliensis	270268	281383
Nucleocytoviricota	Megavirus_chiliensis.fasta	NC_016072.1	Megavirus_chiliensis	306714	317398
Nucleocytoviricota	Megavirus_chiliensis.fasta	NC_016072.1	Megavirus_chiliensis	342729	353085
Nucleocytoviricota	Megavirus_chiliensis.fasta	NC_016072.1	Megavirus_chiliensis	378416	390803
Nucleocytoviricota	Megavirus_chiliensis.fasta	NC_016072.1	Megavirus_chiliensis	416134	430458
Nucleocytoviricota	Megavirus_chiliensis.fasta	NC_016072.1	Megavirus_chiliensis	455789	470758
Nucleocytoviricota	Megavirus_chiliensis.fasta	NC_016072.1	Megavirus_chiliensis	496089	511939
Nucleocytoviricota	Megavirus_chiliensis.fasta	NC_016072.1	Megavirus_chiliensis	537270	562509
Nucleocytoviricota	Megavirus_chiliensis.fasta	NC_016072.1	Megavirus_chiliensis	587840	606319
Nucleocytoviricota	Megavirus_chiliensis.fasta	NC_016072.1	Megavirus_chiliensis	631650	643860
Nucleocytoviricota	Megavirus_chiliensis.fasta	NC_016072.1	Megavirus_chiliensis	669191	679427
Nucleocytoviricota	Megavirus_chiliensis.fasta	NC_016072.1	Megavirus_chiliensis	704758	722056
Nucleocytoviricota	Megavirus_chiliensis.fasta	NC_016072.1	Megavirus_chiliensis	747387	759057
Nucleocytoviricota	Megavirus_chiliensis.fasta	NC_016072.1	Megavirus_chiliensis	784388	800243
Nucleocytoviricota	Megavirus_chiliensis.fasta	NC_016072.1	Megavirus_chiliensis	825574	847935
Nucleocytoviricota	Megavirus_chiliensis.fasta	NC_016072.1	Megavirus_chiliensis	873266	885326
Nucleocytoviricota	Megavirus_chiliensis.fasta	NC_016072.1	Megavirus_chiliensis	910657	923250
Nucleocytoviricota	Megavirus_chiliensis.fasta	NC_016072.1	Megavirus_chiliensis	948581	961200
Nucleocytoviricota	Megavirus_chiliensis.fasta	NC_016072.1	Megavirus_chiliensis	986531	999536
Nucleocytoviricota	Megavirus_chiliensis.fasta	NC_016072.1	Megavirus_chiliensis	1024867	1035439
Nucleocytoviricota	Megavirus_chiliensis.fasta	NC_016072.1	Megavirus_chiliensis	1060770	1086417
Nucleocytoviricota	Megavirus_chiliensis.fasta	NC_016072.1	Megavirus_chiliensis	1111748	1122997
Nucleocytoviricota	Megavirus_chiliensis.fasta	NC_016072.1	Megavirus_chiliensis	1148328	1159588
Nucleocytoviricota	Megavirus_chiliensis.fasta	NC_016072.1	Megavirus_chiliensis	1184919	1195528
Nucleocytoviricota	Megavirus_chiliensis.fasta	NC_016072.1	Megavirus_chiliensis	1220859	1233859
Nucleocytoviricota	Megavirus_courdo7.fasta_1	JN885990.1	Megavirus_courdo7_1	1	10701
Nucleocytoviricota	Megavirus_courdo7.fasta_1	JN885990.1	Megavirus_courdo7_1	11532	21789
Nucleocytoviricota	Megavirus_courdo7.fasta_1	JN885990.1	Megavirus_courdo7_1	22620	32761
Nucleocytoviricota	Megavirus_courdo7.fasta_1	JN885990.1	Megavirus_courdo7_1	33592	44730
Nucleocytoviricota	Megavirus_courdo7.fasta_1	JN885990.1	Megavirus_courdo7_1	45561	61919
Nucleocytoviricota	Megavirus_courdo7.fasta_1	JN885990.1	Megavirus_courdo7_1	62750	81624
Nucleocytoviricota	Megavirus_courdo7.fasta_1	JN885990.1	Megavirus_courdo7_1	82455	95305
Nucleocytoviricota	Megavirus_courdo7.fasta_1	JN885990.1	Megavirus_courdo7_1	96136	118095
Nucleocytoviricota	Megavirus_courdo7.fasta_1	JN885990.1	Megavirus_courdo7_1	118926	131938
Nucleocytoviricota	Megavirus_courdo7.fasta_1	JN885990.1	Megavirus_courdo7_1	132769	144974
Nucleocytoviricota	Megavirus_courdo7.fasta_1	JN885990.1	Megavirus_courdo7_1	145805	158567
Nucleocytoviricota	Megavirus_courdo7.fasta_1	JN885990.1	Megavirus_courdo7_1	159398	172028
Nucleocytoviricota	Megavirus_courdo7.fasta_1	JN885990.1	Megavirus_courdo7_1	172859	240783
Nucleocytoviricota	Megavirus_courdo7.fasta_2	JN885991.1	Megavirus_courdo7_2	1	18646
Nucleocytoviricota	Megavirus_courdo7.fasta_2	JN885991.1	Megavirus_courdo7_2	20823	32545
Nucleocytoviricota	Megavirus_courdo7.fasta_2	JN885991.1	Megavirus_courdo7_2	34722	50308
Nucleocytoviricota	Megavirus_courdo7.fasta_2	JN885991.1	Megavirus_courdo7_2	52485	62740
Nucleocytoviricota	Megavirus_courdo7.fasta_2	JN885991.1	Megavirus_courdo7_2	64917	82343
Nucleocytoviricota	Megavirus_courdo7.fasta_2	JN885991.1	Megavirus_courdo7_2	84520	99060
Nucleocytoviricota	Megavirus_courdo7.fasta_2	JN885991.1	Megavirus_courdo7_2	101237	117421
Nucleocytoviricota	Megavirus_courdo7.fasta_2	JN885991.1	Megavirus_courdo7_2	119598	154674
Nucleocytoviricota	Megavirus_courdo7.fasta_2	JN885991.1	Megavirus_courdo7_2	156851	168343
Nucleocytoviricota	Megavirus_courdo7.fasta_2	JN885991.1	Megavirus_courdo7_2	170520	188003
Nucleocytoviricota	Megavirus_courdo7.fasta_2	JN885991.1	Megavirus_courdo7_2	190180	200350
Nucleocytoviricota	Megavirus_courdo7.fasta_2	JN885991.1	Megavirus_courdo7_2	202527	213340
Nucleocytoviricota	Megavirus_courdo7.fasta_2	JN885991.1	Megavirus_courdo7_2	215517	231110
Nucleocytoviricota	Megavirus_courdo7.fasta_2	JN885991.1	Megavirus_courdo7_2	233287	243847
Nucleocytoviricota	Megavirus_courdo7.fasta_2	JN885991.1	Megavirus_courdo7_2	246024	257825
Nucleocytoviricota	Megavirus_courdo7.fasta_2	JN885991.1	Megavirus_courdo7_2	260002	275892
Nucleocytoviricota	Megavirus_courdo7.fasta_2	JN885991.1	Megavirus_courdo7_2	278069	290538
Nucleocytoviricota	Megavirus_courdo7.fasta_2	JN885991.1	Megavirus_courdo7_2	292715	303714
Nucleocytoviricota	Megavirus_courdo7.fasta_2	JN885991.1	Megavirus_courdo7_2	305891	318266
Nucleocytoviricota	Megavirus_courdo7.fasta_2	JN885991.1	Megavirus_courdo7_2	320443	331809
Nucleocytoviricota	Megavirus_courdo7.fasta_2	JN885991.1	Megavirus_courdo7_2	333986	348846
Nucleocytoviricota	Megavirus_courdo7.fasta_2	JN885991.1	Megavirus_courdo7_2	351023	362280
Nucleocytoviricota	Megavirus_courdo7.fasta_2	JN885991.1	Megavirus_courdo7_2	364457	375822
Nucleocytoviricota	Megavirus_courdo7.fasta_2	JN885991.1	Megavirus_courdo7_2	377999	418238
Nucleocytoviricota	Megavirus_courdo7.fasta_2	JN885991.1	Megavirus_courdo7_2	420415	430669
Nucleocytoviricota	Megavirus_courdo7.fasta_2	JN885991.1	Megavirus_courdo7_2	432846	476391
Nucleocytoviricota	Megavirus_courdo7.fasta_2	JN885991.1	Megavirus_courdo7_2	478568	491282
Nucleocytoviricota	Megavirus_courdo7.fasta_2	JN885991.1	Megavirus_courdo7_2	493459	512970
Nucleocytoviricota	Megavirus_courdo7.fasta_2	JN885991.1	Megavirus_courdo7_2	515147	527506
Nucleocytoviricota	Megavirus_courdo7.fasta_3	JN885992.1	Megavirus_courdo7_3	1	63306
Nucleocytoviricota	Megavirus_courdo7.fasta_3	JN885992.1	Megavirus_courdo7_3	65021	94711
Nucleocytoviricota	Megavirus_courdo7.fasta_3	JN885992.1	Megavirus_courdo7_3	96426	113404
Nucleocytoviricota	Megavirus_courdo7.fasta_3	JN885992.1	Megavirus_courdo7_3	115119	127770
Nucleocytoviricota	Megavirus_courdo7.fasta_3	JN885992.1	Megavirus_courdo7_3	129485	141755
Nucleocytoviricota	Megavirus_courdo7.fasta_3	JN885992.1	Megavirus_courdo7_3	143470	159805
Nucleocytoviricota	Megavirus_courdo7.fasta_4	JN885993.1	Megavirus_courdo7_4	1	59919
Nucleocytoviricota	Mollivirus_sibericum.fasta	NC_027867.1	Mollivirus_sibericum	1	11251
Nucleocytoviricota	Mollivirus_sibericum.fasta	NC_027867.1	Mollivirus_sibericum	16114	32171
Nucleocytoviricota	Mollivirus_sibericum.fasta	NC_027867.1	Mollivirus_sibericum	37034	47083
Nucleocytoviricota	Mollivirus_sibericum.fasta	NC_027867.1	Mollivirus_sibericum	51946	86906
Nucleocytoviricota	Mollivirus_sibericum.fasta	NC_027867.1	Mollivirus_sibericum	91769	104537
Nucleocytoviricota	Mollivirus_sibericum.fasta	NC_027867.1	Mollivirus_sibericum	109400	122179
Nucleocytoviricota	Mollivirus_sibericum.fasta	NC_027867.1	Mollivirus_sibericum	127042	150702
Nucleocytoviricota	Mollivirus_sibericum.fasta	NC_027867.1	Mollivirus_sibericum	155565	168247
Nucleocytoviricota	Mollivirus_sibericum.fasta	NC_027867.1	Mollivirus_sibericum	173110	189300
Nucleocytoviricota	Mollivirus_sibericum.fasta	NC_027867.1	Mollivirus_sibericum	194163	211590
Nucleocytoviricota	Mollivirus_sibericum.fasta	NC_027867.1	Mollivirus_sibericum	216453	228613
Nucleocytoviricota	Mollivirus_sibericum.fasta	NC_027867.1	Mollivirus_sibericum	233476	246877
Nucleocytoviricota	Mollivirus_sibericum.fasta	NC_027867.1	Mollivirus_sibericum	251740	267670
Nucleocytoviricota	Mollivirus_sibericum.fasta	NC_027867.1	Mollivirus_sibericum	272533	293524
Nucleocytoviricota	Mollivirus_sibericum.fasta	NC_027867.1	Mollivirus_sibericum	298387	313446
Nucleocytoviricota	Mollivirus_sibericum.fasta	NC_027867.1	Mollivirus_sibericum	318309	354924
Nucleocytoviricota	Mollivirus_sibericum.fasta	NC_027867.1	Mollivirus_sibericum	359787	371861
Nucleocytoviricota	Mollivirus_sibericum.fasta	NC_027867.1	Mollivirus_sibericum	376724	391511
Nucleocytoviricota	Mollivirus_sibericum.fasta	NC_027867.1	Mollivirus_sibericum	396374	414624
Nucleocytoviricota	Mollivirus_sibericum.fasta	NC_027867.1	Mollivirus_sibericum	419487	473518
Nucleocytoviricota	Mollivirus_sibericum.fasta	NC_027867.1	Mollivirus_sibericum	478381	491384
Nucleocytoviricota	Mollivirus_sibericum.fasta	NC_027867.1	Mollivirus_sibericum	496247	513197
Nucleocytoviricota	Mollivirus_sibericum.fasta	NC_027867.1	Mollivirus_sibericum	518060	537965
Nucleocytoviricota	Mollivirus_sibericum.fasta	NC_027867.1	Mollivirus_sibericum	542828	554063
Nucleocytoviricota	Mollivirus_sibericum.fasta	NC_027867.1	Mollivirus_sibericum	558926	569033
Nucleocytoviricota	Mollivirus_sibericum.fasta	NC_027867.1	Mollivirus_sibericum	573896	584139
Nucleocytoviricota	Mollivirus_sibericum.fasta	NC_027867.1	Mollivirus_sibericum	589002	600321
Nucleocytoviricota	Mollivirus_sibericum.fasta	NC_027867.1	Mollivirus_sibericum	605184	619702
Nucleocytoviricota	Mollivirus_sibericum.fasta	NC_027867.1	Mollivirus_sibericum	624565	646656
Nucleocytoviricota	Moumouvirus_Monve.fasta_2	JN885995.1	Moumouvirus_Monve_2	1	17331
Nucleocytoviricota	Moumouvirus_Monve.fasta_2	JN885995.1	Moumouvirus_Monve_2	19015	76513
Nucleocytoviricota	Moumouvirus_Monve.fasta_2	JN885995.1	Moumouvirus_Monve_2	78197	173184
Nucleocytoviricota	Moumouvirus_Monve.fasta_2	JN885995.1	Moumouvirus_Monve_2	174868	185414
Nucleocytoviricota	Moumouvirus_Monve.fasta_2	JN885995.1	Moumouvirus_Monve_2	187098	197234
Nucleocytoviricota	Moumouvirus_Monve.fasta_4	JN885997.1	Moumouvirus_Monve_4	1	17809
Nucleocytoviricota	Moumouvirus_Monve.fasta_4	JN885997.1	Moumouvirus_Monve_4	18456	30297
Nucleocytoviricota	Moumouvirus_Monve.fasta_4	JN885997.1	Moumouvirus_Monve_4	30944	45532
Nucleocytoviricota	Moumouvirus_Monve.fasta_4	JN885997.1	Moumouvirus_Monve_4	46179	57433
Nucleocytoviricota	Moumouvirus_Monve.fasta_4	JN885997.1	Moumouvirus_Monve_4	58080	70631
Nucleocytoviricota	Moumouvirus_Monve.fasta_4	JN885997.1	Moumouvirus_Monve_4	71278	85648
Nucleocytoviricota	Moumouvirus_Monve.fasta_4	JN885997.1	Moumouvirus_Monve_4	86295	100006
Nucleocytoviricota	Moumouvirus_Monve.fasta_4	JN885997.1	Moumouvirus_Monve_4	100653	113022
Nucleocytoviricota	Moumouvirus_Monve.fasta_4	JN885997.1	Moumouvirus_Monve_4	113669	135522
Nucleocytoviricota	Moumouvirus_Monve.fasta_5	JN885998.1	Moumouvirus_Monve_5	1	21376
Nucleocytoviricota	Moumouvirus_Monve.fasta_5	JN885998.1	Moumouvirus_Monve_5	22444	32794
Nucleocytoviricota	Moumouvirus_Monve.fasta_5	JN885998.1	Moumouvirus_Monve_5	33862	44964
Nucleocytoviricota	Moumouvirus_Monve.fasta_5	JN885998.1	Moumouvirus_Monve_5	46032	80649
Nucleocytoviricota	Moumouvirus_Monve.fasta_5	JN885998.1	Moumouvirus_Monve_5	81717	91859
Nucleocytoviricota	Moumouvirus_Monve.fasta_5	JN885998.1	Moumouvirus_Monve_5	92927	236836
Nucleocytoviricota	Moumouvirus_Monve.fasta_5	JN885998.1	Moumouvirus_Monve_5	237904	277746
Nucleocytoviricota	Moumouvirus_Monve.fasta_5	JN885998.1	Moumouvirus_Monve_5	278814	289388
Nucleocytoviricota	Moumouvirus_Monve.fasta_5	JN885998.1	Moumouvirus_Monve_5	290456	302297
Nucleocytoviricota	Moumouvirus_Monve.fasta_5	JN885998.1	Moumouvirus_Monve_5	303365	316361
Nucleocytoviricota	Moumouvirus_Monve.fasta_5	JN885998.1	Moumouvirus_Monve_5	317429	332098
Nucleocytoviricota	Moumouvirus_Monve.fasta_5	JN885998.1	Moumouvirus_Monve_5	333166	344348
Nucleocytoviricota	Moumouvirus_Monve.fasta_6	JN885999.1	Moumouvirus_Monve_6	1	16783
Nucleocytoviricota	Moumouvirus_Monve.fasta_6	JN885999.1	Moumouvirus_Monve_6	17373	29001
Nucleocytoviricota	Moumouvirus_Monve.fasta_6	JN885999.1	Moumouvirus_Monve_6	29591	46031
Nucleocytoviricota	Moumouvirus_Monve.fasta_6	JN885999.1	Moumouvirus_Monve_6	46621	58578
Nucleocytoviricota	Moumouvirus_Monve.fasta_6	JN885999.1	Moumouvirus_Monve_6	59168	81651
Nucleocytoviricota	Moumouvirus_Monve.fasta_6	JN885999.1	Moumouvirus_Monve_6	82241	123473
Nucleocytoviricota	Moumouvirus_Monve.fasta_6	JN885999.1	Moumouvirus_Monve_6	124063	141301
Nucleocytoviricota	Moumouvirus_Monve.fasta_6	JN885999.1	Moumouvirus_Monve_6	141891	153088
Nucleocytoviricota	Moumouvirus_Monve.fasta_6	JN885999.1	Moumouvirus_Monve_6	153678	192654
Nucleocytoviricota	Moumouvirus_Monve.fasta_6	JN885999.1	Moumouvirus_Monve_6	193244	207676
Nucleocytoviricota	Moumouvirus_Monve.fasta_6	JN885999.1	Moumouvirus_Monve_6	208266	236068
Nucleocytoviricota	Moumouvirus_Monve.fasta_6	JN885999.1	Moumouvirus_Monve_6	236658	249516
Nucleocytoviricota	Moumouvirus_Monve.fasta_6	JN885999.1	Moumouvirus_Monve_6	250106	272015
Nucleocytoviricota	Moumouvirus_Monve.fasta_6	JN885999.1	Moumouvirus_Monve_6	272605	283017
Nucleocytoviricota	Moumouvirus_Monve.fasta_6	JN885999.1	Moumouvirus_Monve_6	283607	294291
Nucleocytoviricota	Organic_lake_phycodnavirus_1.fasta	HQ704802.1	Organic_lake_phycodnavirus_1	1	13202
Nucleocytoviricota	Organic_lake_phycodnavirus_1.fasta	HQ704802.1	Organic_lake_phycodnavirus_1	14430	26389
Nucleocytoviricota	Organic_lake_phycodnavirus_1.fasta	HQ704802.1	Organic_lake_phycodnavirus_1	27617	85669
Nucleocytoviricota	Organic_lake_phycodnavirus_1.fasta	HQ704802.1	Organic_lake_phycodnavirus_1	86897	98770
Nucleocytoviricota	Organic_lake_phycodnavirus_1.fasta	HQ704802.1	Organic_lake_phycodnavirus_1	99998	112133
Nucleocytoviricota	Organic_lake_phycodnavirus_1.fasta	HQ704802.1	Organic_lake_phycodnavirus_1	113361	147896
Nucleocytoviricota	Organic_lake_phycodnavirus_1.fasta	HQ704802.1	Organic_lake_phycodnavirus_1	149124	166359
Nucleocytoviricota	Organic_lake_phycodnavirus_1.fasta	HQ704802.1	Organic_lake_phycodnavirus_1	167587	222633
Nucleocytoviricota	Organic_lake_phycodnavirus_1.fasta	HQ704802.1	Organic_lake_phycodnavirus_1	223861	236775
Nucleocytoviricota	Organic_lake_phycodnavirus_1.fasta	HQ704802.1	Organic_lake_phycodnavirus_1	238003	248849
Nucleocytoviricota	Organic_lake_phycodnavirus_1.fasta	HQ704802.1	Organic_lake_phycodnavirus_1	250077	260276
Nucleocytoviricota	Organic_lake_phycodnavirus_1.fasta	HQ704802.1	Organic_lake_phycodnavirus_1	261504	287329
Nucleocytoviricota	Organic_lake_phycodnavirus_1.fasta	HQ704802.1	Organic_lake_phycodnavirus_1	288557	299993
Nucleocytoviricota	Organic_lake_phycodnavirus_1.fasta	HQ704802.1	Organic_lake_phycodnavirus_1	301221	317305
Nucleocytoviricota	Organic_lake_phycodnavirus_1.fasta	HQ704802.1	Organic_lake_phycodnavirus_1	318533	328979
Nucleocytoviricota	Organic_lake_phycodnavirus_1.fasta	HQ704802.1	Organic_lake_phycodnavirus_1	330207	343488
Nucleocytoviricota	Organic_lake_phycodnavirus_2.fasta	HQ704803.1	Organic_lake_phycodnavirus_2	1	27639
Nucleocytoviricota	Organic_lake_phycodnavirus_2.fasta	HQ704803.1	Organic_lake_phycodnavirus_2	42580	57006
Nucleocytoviricota	Organic_lake_phycodnavirus_2.fasta	HQ704803.1	Organic_lake_phycodnavirus_2	71947	147693
Nucleocytoviricota	Organic_lake_phycodnavirus_2.fasta	HQ704803.1	Organic_lake_phycodnavirus_2	162634	176730
Nucleocytoviricota	Organic_lake_phycodnavirus_2.fasta	HQ704803.1	Organic_lake_phycodnavirus_2	191671	209821
Nucleocytoviricota	Organic_lake_phycodnavirus_2.fasta	HQ704803.1	Organic_lake_phycodnavirus_2	224762	237427
Nucleocytoviricota	Organic_lake_phycodnavirus_2.fasta	HQ704803.1	Organic_lake_phycodnavirus_2	252368	267133
Nucleocytoviricota	Orpheovirus.fasta	LT906555.1	Orpheovirus	1	16167
Nucleocytoviricota	Orpheovirus.fasta	LT906555.1	Orpheovirus	44056	54700
Nucleocytoviricota	Orpheovirus.fasta	LT906555.1	Orpheovirus	82589	133604
Nucleocytoviricota	Orpheovirus.fasta	LT906555.1	Orpheovirus	161493	264612
Nucleocytoviricota	Orpheovirus.fasta	LT906555.1	Orpheovirus	292501	305224
Nucleocytoviricota	Orpheovirus.fasta	LT906555.1	Orpheovirus	333113	354645
Nucleocytoviricota	Orpheovirus.fasta	LT906555.1	Orpheovirus	382534	395358
Nucleocytoviricota	Orpheovirus.fasta	LT906555.1	Orpheovirus	423247	438209
Nucleocytoviricota	Orpheovirus.fasta	LT906555.1	Orpheovirus	466098	477043
Nucleocytoviricota	Orpheovirus.fasta	LT906555.1	Orpheovirus	504932	517301
Nucleocytoviricota	Orpheovirus.fasta	LT906555.1	Orpheovirus	545190	556640
Nucleocytoviricota	Orpheovirus.fasta	LT906555.1	Orpheovirus	584529	599633
Nucleocytoviricota	Orpheovirus.fasta	LT906555.1	Orpheovirus	627522	637826
Nucleocytoviricota	Orpheovirus.fasta	LT906555.1	Orpheovirus	665715	712156
Nucleocytoviricota	Orpheovirus.fasta	LT906555.1	Orpheovirus	740045	750856
Nucleocytoviricota	Orpheovirus.fasta	LT906555.1	Orpheovirus	778745	793907
Nucleocytoviricota	Orpheovirus.fasta	LT906555.1	Orpheovirus	821796	836252
Nucleocytoviricota	Orpheovirus.fasta	LT906555.1	Orpheovirus	864141	891915
Nucleocytoviricota	Orpheovirus.fasta	LT906555.1	Orpheovirus	919804	976159
Nucleocytoviricota	Orpheovirus.fasta	LT906555.1	Orpheovirus	1004048	1027018
Nucleocytoviricota	Orpheovirus.fasta	LT906555.1	Orpheovirus	1054907	1067594
Nucleocytoviricota	Orpheovirus.fasta	LT906555.1	Orpheovirus	1095483	1144446
Nucleocytoviricota	Orpheovirus.fasta	LT906555.1	Orpheovirus	1172335	1188062
Nucleocytoviricota	Orpheovirus.fasta	LT906555.1	Orpheovirus	1215951	1229940
Nucleocytoviricota	Orpheovirus.fasta	LT906555.1	Orpheovirus	1257829	1286506
Nucleocytoviricota	Orpheovirus.fasta	LT906555.1	Orpheovirus	1314395	1325527
Nucleocytoviricota	Orpheovirus.fasta	LT906555.1	Orpheovirus	1353416	1367187
Nucleocytoviricota	Orpheovirus.fasta	LT906555.1	Orpheovirus	1395076	1405894
Nucleocytoviricota	Orpheovirus.fasta	LT906555.1	Orpheovirus	1433783	1445689
Nucleocytoviricota	Ostreococcus_tauri_virus_1.fasta	NC_013288.1	Ostreococcus_tauri_virus_1	1	100993
Nucleocytoviricota	Ostreococcus_tauri_virus_1.fasta	NC_013288.1	Ostreococcus_tauri_virus_1	115713	130542
Nucleocytoviricota	Ostreococcus_tauri_virus_1.fasta	NC_013288.1	Ostreococcus_tauri_virus_1	145262	177042
Nucleocytoviricota	Pacmanvirus.fasta	NC_034383.1	Pacmanvirus	1	14247
Nucleocytoviricota	Pacmanvirus.fasta	NC_034383.1	Pacmanvirus	15655	29499
Nucleocytoviricota	Pacmanvirus.fasta	NC_034383.1	Pacmanvirus	30907	44842
Nucleocytoviricota	Pacmanvirus.fasta	NC_034383.1	Pacmanvirus	46250	60779
Nucleocytoviricota	Pacmanvirus.fasta	NC_034383.1	Pacmanvirus	62187	73583
Nucleocytoviricota	Pacmanvirus.fasta	NC_034383.1	Pacmanvirus	74991	87245
Nucleocytoviricota	Pacmanvirus.fasta	NC_034383.1	Pacmanvirus	88653	107623
Nucleocytoviricota	Pacmanvirus.fasta	NC_034383.1	Pacmanvirus	109031	124134
Nucleocytoviricota	Pacmanvirus.fasta	NC_034383.1	Pacmanvirus	125542	153824
Nucleocytoviricota	Pacmanvirus.fasta	NC_034383.1	Pacmanvirus	155232	178212
Nucleocytoviricota	Pacmanvirus.fasta	NC_034383.1	Pacmanvirus	179620	207961
Nucleocytoviricota	Pacmanvirus.fasta	NC_034383.1	Pacmanvirus	209369	219608
Nucleocytoviricota	Pacmanvirus.fasta	NC_034383.1	Pacmanvirus	221016	231145
Nucleocytoviricota	Pacmanvirus.fasta	NC_034383.1	Pacmanvirus	232553	246870
Nucleocytoviricota	Pacmanvirus.fasta	NC_034383.1	Pacmanvirus	248278	258795
Nucleocytoviricota	Pacmanvirus.fasta	NC_034383.1	Pacmanvirus	260203	278156
Nucleocytoviricota	Pacmanvirus.fasta	NC_034383.1	Pacmanvirus	279564	300073
Nucleocytoviricota	Pacmanvirus.fasta	NC_034383.1	Pacmanvirus	301481	326309
Nucleocytoviricota	Pacmanvirus.fasta	NC_034383.1	Pacmanvirus	327717	343299
Nucleocytoviricota	Pacmanvirus.fasta	NC_034383.1	Pacmanvirus	344707	358792
Nucleocytoviricota	Pacmanvirus.fasta	NC_034383.1	Pacmanvirus	360200	370203
Nucleocytoviricota	Pacmanvirus.fasta	NC_034383.1	Pacmanvirus	371611	393988
Nucleocytoviricota	Pandoravirus_dulcis.fasta	NC_021858.1	Pandoravirus_dulcis	1	21093
Nucleocytoviricota	Pandoravirus_dulcis.fasta	NC_021858.1	Pandoravirus_dulcis	64289	79154
Nucleocytoviricota	Pandoravirus_dulcis.fasta	NC_021858.1	Pandoravirus_dulcis	122350	194682
Nucleocytoviricota	Pandoravirus_dulcis.fasta	NC_021858.1	Pandoravirus_dulcis	237878	257000
Nucleocytoviricota	Pandoravirus_dulcis.fasta	NC_021858.1	Pandoravirus_dulcis	300196	348574
Nucleocytoviricota	Pandoravirus_dulcis.fasta	NC_021858.1	Pandoravirus_dulcis	391770	406569
Nucleocytoviricota	Pandoravirus_dulcis.fasta	NC_021858.1	Pandoravirus_dulcis	449765	490909
Nucleocytoviricota	Pandoravirus_dulcis.fasta	NC_021858.1	Pandoravirus_dulcis	534105	548531
Nucleocytoviricota	Pandoravirus_dulcis.fasta	NC_021858.1	Pandoravirus_dulcis	591727	608184
Nucleocytoviricota	Pandoravirus_dulcis.fasta	NC_021858.1	Pandoravirus_dulcis	651380	667820
Nucleocytoviricota	Pandoravirus_dulcis.fasta	NC_021858.1	Pandoravirus_dulcis	711016	722496
Nucleocytoviricota	Pandoravirus_dulcis.fasta	NC_021858.1	Pandoravirus_dulcis	765692	776234
Nucleocytoviricota	Pandoravirus_dulcis.fasta	NC_021858.1	Pandoravirus_dulcis	819430	829537
Nucleocytoviricota	Pandoravirus_dulcis.fasta	NC_021858.1	Pandoravirus_dulcis	872733	883016
Nucleocytoviricota	Pandoravirus_dulcis.fasta	NC_021858.1	Pandoravirus_dulcis	926212	937445
Nucleocytoviricota	Pandoravirus_dulcis.fasta	NC_021858.1	Pandoravirus_dulcis	980641	999818
Nucleocytoviricota	Pandoravirus_dulcis.fasta	NC_021858.1	Pandoravirus_dulcis	1043014	1073012
Nucleocytoviricota	Pandoravirus_dulcis.fasta	NC_021858.1	Pandoravirus_dulcis	1116208	1127005
Nucleocytoviricota	Pandoravirus_dulcis.fasta	NC_021858.1	Pandoravirus_dulcis	1170201	1180413
Nucleocytoviricota	Pandoravirus_dulcis.fasta	NC_021858.1	Pandoravirus_dulcis	1223609	1234311
Nucleocytoviricota	Pandoravirus_dulcis.fasta	NC_021858.1	Pandoravirus_dulcis	1277507	1288003
Nucleocytoviricota	Pandoravirus_dulcis.fasta	NC_021858.1	Pandoravirus_dulcis	1331199	1344763
Nucleocytoviricota	Pandoravirus_dulcis.fasta	NC_021858.1	Pandoravirus_dulcis	1387959	1398838
Nucleocytoviricota	Pandoravirus_dulcis.fasta	NC_021858.1	Pandoravirus_dulcis	1442034	1456018
Nucleocytoviricota	Pandoravirus_dulcis.fasta	NC_021858.1	Pandoravirus_dulcis	1499214	1510912
Nucleocytoviricota	Pandoravirus_dulcis.fasta	NC_021858.1	Pandoravirus_dulcis	1554108	1608444
Nucleocytoviricota	Pandoravirus_dulcis.fasta	NC_021858.1	Pandoravirus_dulcis	1651640	1714142
Nucleocytoviricota	Pandoravirus_dulcis.fasta	NC_021858.1	Pandoravirus_dulcis	1757338	1779915
Nucleocytoviricota	Pandoravirus_dulcis.fasta	NC_021858.1	Pandoravirus_dulcis	1823111	1865334
Nucleocytoviricota	Pandoravirus_salinus.fasta	NC_022098.1	Pandoravirus_salinus	1	50036
Nucleocytoviricota	Pandoravirus_salinus.fasta	NC_022098.1	Pandoravirus_salinus	117583	127860
Nucleocytoviricota	Pandoravirus_salinus.fasta	NC_022098.1	Pandoravirus_salinus	195407	208578
Nucleocytoviricota	Pandoravirus_salinus.fasta	NC_022098.1	Pandoravirus_salinus	276125	292428
Nucleocytoviricota	Pandoravirus_salinus.fasta	NC_022098.1	Pandoravirus_salinus	359975	376234
Nucleocytoviricota	Pandoravirus_salinus.fasta	NC_022098.1	Pandoravirus_salinus	443781	458257
Nucleocytoviricota	Pandoravirus_salinus.fasta	NC_022098.1	Pandoravirus_salinus	525804	544734
Nucleocytoviricota	Pandoravirus_salinus.fasta	NC_022098.1	Pandoravirus_salinus	612281	630071
Nucleocytoviricota	Pandoravirus_salinus.fasta	NC_022098.1	Pandoravirus_salinus	697618	709536
Nucleocytoviricota	Pandoravirus_salinus.fasta	NC_022098.1	Pandoravirus_salinus	777083	790028
Nucleocytoviricota	Pandoravirus_salinus.fasta	NC_022098.1	Pandoravirus_salinus	857575	871220
Nucleocytoviricota	Pandoravirus_salinus.fasta	NC_022098.1	Pandoravirus_salinus	938767	961859
Nucleocytoviricota	Pandoravirus_salinus.fasta	NC_022098.1	Pandoravirus_salinus	1029406	1092550
Nucleocytoviricota	Pandoravirus_salinus.fasta	NC_022098.1	Pandoravirus_salinus	1160097	1180588
Nucleocytoviricota	Pandoravirus_salinus.fasta	NC_022098.1	Pandoravirus_salinus	1248135	1258927
Nucleocytoviricota	Pandoravirus_salinus.fasta	NC_022098.1	Pandoravirus_salinus	1326474	1343191
Nucleocytoviricota	Pandoravirus_salinus.fasta	NC_022098.1	Pandoravirus_salinus	1410738	1421128
Nucleocytoviricota	Pandoravirus_salinus.fasta	NC_022098.1	Pandoravirus_salinus	1488675	1499202
Nucleocytoviricota	Pandoravirus_salinus.fasta	NC_022098.1	Pandoravirus_salinus	1566749	1577271
Nucleocytoviricota	Pandoravirus_salinus.fasta	NC_022098.1	Pandoravirus_salinus	1644818	1662522
Nucleocytoviricota	Pandoravirus_salinus.fasta	NC_022098.1	Pandoravirus_salinus	1730069	1751562
Nucleocytoviricota	Pandoravirus_salinus.fasta	NC_022098.1	Pandoravirus_salinus	1819109	1832331
Nucleocytoviricota	Pandoravirus_salinus.fasta	NC_022098.1	Pandoravirus_salinus	1899878	1925620
Nucleocytoviricota	Pandoravirus_salinus.fasta	NC_022098.1	Pandoravirus_salinus	1993167	2003537
Nucleocytoviricota	Pandoravirus_salinus.fasta	NC_022098.1	Pandoravirus_salinus	2071084	2085805
Nucleocytoviricota	Pandoravirus_salinus.fasta	NC_022098.1	Pandoravirus_salinus	2153352	2166831
Nucleocytoviricota	Pandoravirus_salinus.fasta	NC_022098.1	Pandoravirus_salinus	2234378	2244682
Nucleocytoviricota	Pandoravirus_salinus.fasta	NC_022098.1	Pandoravirus_salinus	2312229	2328621
Nucleocytoviricota	Pandoravirus_salinus.fasta	NC_022098.1	Pandoravirus_salinus	2396168	2406317
Nucleocytoviricota	Paramecium_bursaria_Chlorella_virus_1.fasta	NC_000852.5	Paramecium_bursaria_Chlorella_virus_1	1	27759
Nucleocytoviricota	Paramecium_bursaria_Chlorella_virus_1.fasta	NC_000852.5	Paramecium_bursaria_Chlorella_virus_1	28920	125835
Nucleocytoviricota	Paramecium_bursaria_Chlorella_virus_1.fasta	NC_000852.5	Paramecium_bursaria_Chlorella_virus_1	126996	137974
Nucleocytoviricota	Paramecium_bursaria_Chlorella_virus_1.fasta	NC_000852.5	Paramecium_bursaria_Chlorella_virus_1	139135	154611
Nucleocytoviricota	Paramecium_bursaria_Chlorella_virus_1.fasta	NC_000852.5	Paramecium_bursaria_Chlorella_virus_1	155772	197590
Nucleocytoviricota	Paramecium_bursaria_Chlorella_virus_1.fasta	NC_000852.5	Paramecium_bursaria_Chlorella_virus_1	198751	211837
Nucleocytoviricota	Paramecium_bursaria_Chlorella_virus_1.fasta	NC_000852.5	Paramecium_bursaria_Chlorella_virus_1	212998	224518
Nucleocytoviricota	Paramecium_bursaria_Chlorella_virus_1.fasta	NC_000852.5	Paramecium_bursaria_Chlorella_virus_1	225679	245824
Nucleocytoviricota	Paramecium_bursaria_Chlorella_virus_1.fasta	NC_000852.5	Paramecium_bursaria_Chlorella_virus_1	246985	263492
Nucleocytoviricota	Paramecium_bursaria_Chlorella_virus_1.fasta	NC_000852.5	Paramecium_bursaria_Chlorella_virus_1	264653	287418
Nucleocytoviricota	Paramecium_bursaria_Chlorella_virus_1.fasta	NC_000852.5	Paramecium_bursaria_Chlorella_virus_1	288579	305906
Nucleocytoviricota	Paramecium_bursaria_Chlorella_virus_1.fasta	NC_000852.5	Paramecium_bursaria_Chlorella_virus_1	307067	318060
Nucleocytoviricota	Paramecium_bursaria_Chlorella_virus_1.fasta	NC_000852.5	Paramecium_bursaria_Chlorella_virus_1	319221	329446
Nucleocytoviricota	Phaeocystis_globosa_virus.fasta	NC_021312.1	Phaeocystis_globosa_virus	1	29382
Nucleocytoviricota	Phaeocystis_globosa_virus.fasta	NC_021312.1	Phaeocystis_globosa_virus	29912	40358
Nucleocytoviricota	Phaeocystis_globosa_virus.fasta	NC_021312.1	Phaeocystis_globosa_virus	40888	51463
Nucleocytoviricota	Phaeocystis_globosa_virus.fasta	NC_021312.1	Phaeocystis_globosa_virus	51993	64592
Nucleocytoviricota	Phaeocystis_globosa_virus.fasta	NC_021312.1	Phaeocystis_globosa_virus	65122	93469
Nucleocytoviricota	Phaeocystis_globosa_virus.fasta	NC_021312.1	Phaeocystis_globosa_virus	93999	106572
Nucleocytoviricota	Phaeocystis_globosa_virus.fasta	NC_021312.1	Phaeocystis_globosa_virus	107102	117554
Nucleocytoviricota	Phaeocystis_globosa_virus.fasta	NC_021312.1	Phaeocystis_globosa_virus	118084	129295
Nucleocytoviricota	Phaeocystis_globosa_virus.fasta	NC_021312.1	Phaeocystis_globosa_virus	129825	141388
Nucleocytoviricota	Phaeocystis_globosa_virus.fasta	NC_021312.1	Phaeocystis_globosa_virus	141918	156947
Nucleocytoviricota	Phaeocystis_globosa_virus.fasta	NC_021312.1	Phaeocystis_globosa_virus	157477	212439
Nucleocytoviricota	Phaeocystis_globosa_virus.fasta	NC_021312.1	Phaeocystis_globosa_virus	212969	225965
Nucleocytoviricota	Phaeocystis_globosa_virus.fasta	NC_021312.1	Phaeocystis_globosa_virus	226495	263254
Nucleocytoviricota	Phaeocystis_globosa_virus.fasta	NC_021312.1	Phaeocystis_globosa_virus	263784	280324
Nucleocytoviricota	Phaeocystis_globosa_virus.fasta	NC_021312.1	Phaeocystis_globosa_virus	280854	291192
Nucleocytoviricota	Phaeocystis_globosa_virus.fasta	NC_021312.1	Phaeocystis_globosa_virus	291722	302123
Nucleocytoviricota	Phaeocystis_globosa_virus.fasta	NC_021312.1	Phaeocystis_globosa_virus	302653	317888
Nucleocytoviricota	Phaeocystis_globosa_virus.fasta	NC_021312.1	Phaeocystis_globosa_virus	318418	350938
Nucleocytoviricota	Phaeocystis_globosa_virus.fasta	NC_021312.1	Phaeocystis_globosa_virus	351468	361657
Nucleocytoviricota	Phaeocystis_globosa_virus.fasta	NC_021312.1	Phaeocystis_globosa_virus	362187	373724
Nucleocytoviricota	Phaeocystis_globosa_virus.fasta	NC_021312.1	Phaeocystis_globosa_virus	374254	422853
Nucleocytoviricota	Phaeocystis_globosa_virus.fasta	NC_021312.1	Phaeocystis_globosa_virus	423383	435770
Nucleocytoviricota	Phaeocystis_globosa_virus.fasta	NC_021312.1	Phaeocystis_globosa_virus	436300	459451
Nucleocytoviricota	Pithovirus_sibericum.fasta	NC_023423.1	Pithovirus_sibericum	1	10154
Nucleocytoviricota	Pithovirus_sibericum.fasta	NC_023423.1	Pithovirus_sibericum	10975	23761
Nucleocytoviricota	Pithovirus_sibericum.fasta	NC_023423.1	Pithovirus_sibericum	24582	39934
Nucleocytoviricota	Pithovirus_sibericum.fasta	NC_023423.1	Pithovirus_sibericum	40755	71719
Nucleocytoviricota	Pithovirus_sibericum.fasta	NC_023423.1	Pithovirus_sibericum	72540	139236
Nucleocytoviricota	Pithovirus_sibericum.fasta	NC_023423.1	Pithovirus_sibericum	140057	162306
Nucleocytoviricota	Pithovirus_sibericum.fasta	NC_023423.1	Pithovirus_sibericum	163127	175382
Nucleocytoviricota	Pithovirus_sibericum.fasta	NC_023423.1	Pithovirus_sibericum	176203	188511
Nucleocytoviricota	Pithovirus_sibericum.fasta	NC_023423.1	Pithovirus_sibericum	189332	211566
Nucleocytoviricota	Pithovirus_sibericum.fasta	NC_023423.1	Pithovirus_sibericum	212387	238110
Nucleocytoviricota	Pithovirus_sibericum.fasta	NC_023423.1	Pithovirus_sibericum	238931	274420
Nucleocytoviricota	Pithovirus_sibericum.fasta	NC_023423.1	Pithovirus_sibericum	275241	286797
Nucleocytoviricota	Pithovirus_sibericum.fasta	NC_023423.1	Pithovirus_sibericum	287618	304020
Nucleocytoviricota	Pithovirus_sibericum.fasta	NC_023423.1	Pithovirus_sibericum	304841	328554
Nucleocytoviricota	Pithovirus_sibericum.fasta	NC_023423.1	Pithovirus_sibericum	329375	347625
Nucleocytoviricota	Pithovirus_sibericum.fasta	NC_023423.1	Pithovirus_sibericum	348446	371127
Nucleocytoviricota	Pithovirus_sibericum.fasta	NC_023423.1	Pithovirus_sibericum	371948	387474
Nucleocytoviricota	Pithovirus_sibericum.fasta	NC_023423.1	Pithovirus_sibericum	388295	451733
Nucleocytoviricota	Pithovirus_sibericum.fasta	NC_023423.1	Pithovirus_sibericum	452554	467022
Nucleocytoviricota	Pithovirus_sibericum.fasta	NC_023423.1	Pithovirus_sibericum	467843	487833
Nucleocytoviricota	Pithovirus_sibericum.fasta	NC_023423.1	Pithovirus_sibericum	488654	504351
Nucleocytoviricota	Pithovirus_sibericum.fasta	NC_023423.1	Pithovirus_sibericum	505172	525298
Nucleocytoviricota	Pithovirus_sibericum.fasta	NC_023423.1	Pithovirus_sibericum	526119	549872
Nucleocytoviricota	Pithovirus_sibericum.fasta	NC_023423.1	Pithovirus_sibericum	550693	564103
Nucleocytoviricota	Pithovirus_sibericum.fasta	NC_023423.1	Pithovirus_sibericum	564924	575144
Nucleocytoviricota	Pithovirus_sibericum.fasta	NC_023423.1	Pithovirus_sibericum	575965	586238
Nucleocytoviricota	Pithovirus_sibericum.fasta	NC_023423.1	Pithovirus_sibericum	587059	609224
Nucleocytoviricota	Port-miou_virus.fasta	NC_028047.1	Port-miou_virus	1	10867
Nucleocytoviricota	Port-miou_virus.fasta	NC_028047.1	Port-miou_virus	10871	21061
Nucleocytoviricota	Port-miou_virus.fasta	NC_028047.1	Port-miou_virus	21065	37038
Nucleocytoviricota	Port-miou_virus.fasta	NC_028047.1	Port-miou_virus	37042	76346
Nucleocytoviricota	Port-miou_virus.fasta	NC_028047.1	Port-miou_virus	76350	100680
Nucleocytoviricota	Port-miou_virus.fasta	NC_028047.1	Port-miou_virus	100684	110715
Nucleocytoviricota	Port-miou_virus.fasta	NC_028047.1	Port-miou_virus	110719	121897
Nucleocytoviricota	Port-miou_virus.fasta	NC_028047.1	Port-miou_virus	121901	134003
Nucleocytoviricota	Port-miou_virus.fasta	NC_028047.1	Port-miou_virus	134007	148239
Nucleocytoviricota	Port-miou_virus.fasta	NC_028047.1	Port-miou_virus	148243	162334
Nucleocytoviricota	Port-miou_virus.fasta	NC_028047.1	Port-miou_virus	162338	176175
Nucleocytoviricota	Port-miou_virus.fasta	NC_028047.1	Port-miou_virus	176179	189688
Nucleocytoviricota	Port-miou_virus.fasta	NC_028047.1	Port-miou_virus	189692	210624
Nucleocytoviricota	Port-miou_virus.fasta	NC_028047.1	Port-miou_virus	210628	224025
Nucleocytoviricota	Port-miou_virus.fasta	NC_028047.1	Port-miou_virus	224029	328195
Nucleocytoviricota	Port-miou_virus.fasta	NC_028047.1	Port-miou_virus	328199	338533
Nucleocytoviricota	Port-miou_virus.fasta	NC_028047.1	Port-miou_virus	338537	349275
Nucleocytoviricota	Red_seabream_iridovirus.fasta	AB104413.1	Red_seabream_iridovirus	1	30769
Nucleocytoviricota	Red_seabream_iridovirus.fasta	AB104413.1	Red_seabream_iridovirus	36184	54545
Nucleocytoviricota	Red_seabream_iridovirus.fasta	AB104413.1	Red_seabream_iridovirus	59960	87356
Nucleocytoviricota	Red_seabream_iridovirus.fasta	AB104413.1	Red_seabream_iridovirus	92771	106999
Nucleocytoviricota	Spodoptera_frugiperda_ascovirus_1a.fasta	NC_008361.1	Spodoptera_frugiperda_ascovirus_1a	1	13207
Nucleocytoviricota	Spodoptera_frugiperda_ascovirus_1a.fasta	NC_008361.1	Spodoptera_frugiperda_ascovirus_1a	13895	24505
Nucleocytoviricota	Spodoptera_frugiperda_ascovirus_1a.fasta	NC_008361.1	Spodoptera_frugiperda_ascovirus_1a	25193	37342
Nucleocytoviricota	Spodoptera_frugiperda_ascovirus_1a.fasta	NC_008361.1	Spodoptera_frugiperda_ascovirus_1a	38030	64868
Nucleocytoviricota	Spodoptera_frugiperda_ascovirus_1a.fasta	NC_008361.1	Spodoptera_frugiperda_ascovirus_1a	65556	77120
Nucleocytoviricota	Spodoptera_frugiperda_ascovirus_1a.fasta	NC_008361.1	Spodoptera_frugiperda_ascovirus_1a	77808	156237
Nucleocytoviricota	Tetraselmis_virus_1.fasta	KY322437.1	Tetraselmis_virus_1	1	10640
Nucleocytoviricota	Tetraselmis_virus_1.fasta	KY322437.1	Tetraselmis_virus_1	15102	25152
Nucleocytoviricota	Tetraselmis_virus_1.fasta	KY322437.1	Tetraselmis_virus_1	29614	41917
Nucleocytoviricota	Tetraselmis_virus_1.fasta	KY322437.1	Tetraselmis_virus_1	46379	68168
Nucleocytoviricota	Tetraselmis_virus_1.fasta	KY322437.1	Tetraselmis_virus_1	72630	82882
Nucleocytoviricota	Tetraselmis_virus_1.fasta	KY322437.1	Tetraselmis_virus_1	87344	101669
Nucleocytoviricota	Tetraselmis_virus_1.fasta	KY322437.1	Tetraselmis_virus_1	106131	118636
Nucleocytoviricota	Tetraselmis_virus_1.fasta	KY322437.1	Tetraselmis_virus_1	123098	138483
Nucleocytoviricota	Tetraselmis_virus_1.fasta	KY322437.1	Tetraselmis_virus_1	142945	186362
Nucleocytoviricota	Tetraselmis_virus_1.fasta	KY322437.1	Tetraselmis_virus_1	190824	211016
Nucleocytoviricota	Tetraselmis_virus_1.fasta	KY322437.1	Tetraselmis_virus_1	215478	230518
Nucleocytoviricota	Tetraselmis_virus_1.fasta	KY322437.1	Tetraselmis_virus_1	234980	245916
Nucleocytoviricota	Tetraselmis_virus_1.fasta	KY322437.1	Tetraselmis_virus_1	250378	261422
Nucleocytoviricota	Tetraselmis_virus_1.fasta	KY322437.1	Tetraselmis_virus_1	265884	294243
Nucleocytoviricota	Tetraselmis_virus_1.fasta	KY322437.1	Tetraselmis_virus_1	298705	318233
Nucleocytoviricota	Tetraselmis_virus_1.fasta	KY322437.1	Tetraselmis_virus_1	322695	333660
Nucleocytoviricota	Tetraselmis_virus_1.fasta	KY322437.1	Tetraselmis_virus_1	338122	348873
Nucleocytoviricota	Tetraselmis_virus_1.fasta	KY322437.1	Tetraselmis_virus_1	353335	363805
Nucleocytoviricota	Tetraselmis_virus_1.fasta	KY322437.1	Tetraselmis_virus_1	368267	382124
Nucleocytoviricota	Tetraselmis_virus_1.fasta	KY322437.1	Tetraselmis_virus_1	386586	409286
Nucleocytoviricota	Tetraselmis_virus_1.fasta	KY322437.1	Tetraselmis_virus_1	413748	436763
Nucleocytoviricota	Tetraselmis_virus_1.fasta	KY322437.1	Tetraselmis_virus_1	441225	493104
Nucleocytoviricota	Tetraselmis_virus_1.fasta	KY322437.1	Tetraselmis_virus_1	497566	541911
Nucleocytoviricota	Tetraselmis_virus_1.fasta	KY322437.1	Tetraselmis_virus_1	546373	568055
Nucleocytoviricota	Tetraselmis_virus_1.fasta	KY322437.1	Tetraselmis_virus_1	572517	599039
Nucleocytoviricota	Tetraselmis_virus_1.fasta	KY322437.1	Tetraselmis_virus_1	603501	614381
Nucleocytoviricota	Tetraselmis_virus_1.fasta	KY322437.1	Tetraselmis_virus_1	618843	630724
Nucleocytoviricota	Tetraselmis_virus_1.fasta	KY322437.1	Tetraselmis_virus_1	635186	647557
Nucleocytoviricota	Tetraselmis_virus_1.fasta	KY322437.1	Tetraselmis_virus_1	652019	663561
Nucleocytoviricota	Trichoplusia_ni_ascovirus_2c.fasta	NC_008518.1	Trichoplusia_ni_ascovirus_2c	1	10221
Nucleocytoviricota	Trichoplusia_ni_ascovirus_2c.fasta	NC_008518.1	Trichoplusia_ni_ascovirus_2c	10314	108917
Nucleocytoviricota	Trichoplusia_ni_ascovirus_2c.fasta	NC_008518.1	Trichoplusia_ni_ascovirus_2c	109010	122744
Nucleocytoviricota	Trichoplusia_ni_ascovirus_2c.fasta	NC_008518.1	Trichoplusia_ni_ascovirus_2c	122837	133048
Nucleocytoviricota	Trichoplusia_ni_ascovirus_2c.fasta	NC_008518.1	Trichoplusia_ni_ascovirus_2c	133141	157113
Nucleocytoviricota	Trichoplusia_ni_ascovirus_2c.fasta	NC_008518.1	Trichoplusia_ni_ascovirus_2c	157206	173966
Nucleocytoviricota	Tunisvirus_fontaine.fasta	KF483846.1	Tunisvirus_fontaine	1	12558
Nucleocytoviricota	Tunisvirus_fontaine.fasta	KF483846.1	Tunisvirus_fontaine	12606	24139
Nucleocytoviricota	Tunisvirus_fontaine.fasta	KF483846.1	Tunisvirus_fontaine	24187	63557
Nucleocytoviricota	Tunisvirus_fontaine.fasta	KF483846.1	Tunisvirus_fontaine	63605	74559
Nucleocytoviricota	Tunisvirus_fontaine.fasta	KF483846.1	Tunisvirus_fontaine	74607	88317
Nucleocytoviricota	Tunisvirus_fontaine.fasta	KF483846.1	Tunisvirus_fontaine	88365	98781
Nucleocytoviricota	Tunisvirus_fontaine.fasta	KF483846.1	Tunisvirus_fontaine	98829	112701
Nucleocytoviricota	Tunisvirus_fontaine.fasta	KF483846.1	Tunisvirus_fontaine	112749	124033
Nucleocytoviricota	Tunisvirus_fontaine.fasta	KF483846.1	Tunisvirus_fontaine	124081	138543
Nucleocytoviricota	Tunisvirus_fontaine.fasta	KF483846.1	Tunisvirus_fontaine	138591	151431
Nucleocytoviricota	Tunisvirus_fontaine.fasta	KF483846.1	Tunisvirus_fontaine	151479	311979
Nucleocytoviricota	Tunisvirus_fontaine.fasta	KF483846.1	Tunisvirus_fontaine	312027	324210
Nucleocytoviricota	Tunisvirus_fontaine.fasta	KF483846.1	Tunisvirus_fontaine	324258	343945
Nucleocytoviricota	Tunisvirus_fontaine.fasta	KF483846.1	Tunisvirus_fontaine	343993	356232
Nucleocytoviricota	Tunisvirus_fontaine.fasta	KF483846.1	Tunisvirus_fontaine	356280	369025
Nucleocytoviricota	Tunisvirus_fontaine.fasta	KF483846.1	Tunisvirus_fontaine	369073	379960
Nucleocytoviricota	Tupanvirus_isolate_sodalake.fasta	KY523104.1	Tupanvirus_isolate_sodalake	1	67839
Nucleocytoviricota	Tupanvirus_isolate_sodalake.fasta	KY523104.1	Tupanvirus_isolate_sodalake	86588	161825
Nucleocytoviricota	Tupanvirus_isolate_sodalake.fasta	KY523104.1	Tupanvirus_isolate_sodalake	180574	190815
Nucleocytoviricota	Tupanvirus_isolate_sodalake.fasta	KY523104.1	Tupanvirus_isolate_sodalake	209564	229420
Nucleocytoviricota	Tupanvirus_isolate_sodalake.fasta	KY523104.1	Tupanvirus_isolate_sodalake	248169	266748
Nucleocytoviricota	Tupanvirus_isolate_sodalake.fasta	KY523104.1	Tupanvirus_isolate_sodalake	285497	301602
Nucleocytoviricota	Tupanvirus_isolate_sodalake.fasta	KY523104.1	Tupanvirus_isolate_sodalake	320351	375313
Nucleocytoviricota	Tupanvirus_isolate_sodalake.fasta	KY523104.1	Tupanvirus_isolate_sodalake	394062	437547
Nucleocytoviricota	Tupanvirus_isolate_sodalake.fasta	KY523104.1	Tupanvirus_isolate_sodalake	456296	580260
Nucleocytoviricota	Tupanvirus_isolate_sodalake.fasta	KY523104.1	Tupanvirus_isolate_sodalake	599009	646725
Nucleocytoviricota	Tupanvirus_isolate_sodalake.fasta	KY523104.1	Tupanvirus_isolate_sodalake	665474	681480
Nucleocytoviricota	Tupanvirus_isolate_sodalake.fasta	KY523104.1	Tupanvirus_isolate_sodalake	700229	717375
Nucleocytoviricota	Tupanvirus_isolate_sodalake.fasta	KY523104.1	Tupanvirus_isolate_sodalake	736124	793664
Nucleocytoviricota	Tupanvirus_isolate_sodalake.fasta	KY523104.1	Tupanvirus_isolate_sodalake	812413	827058
Nucleocytoviricota	Tupanvirus_isolate_sodalake.fasta	KY523104.1	Tupanvirus_isolate_sodalake	845807	885459
Nucleocytoviricota	Tupanvirus_isolate_sodalake.fasta	KY523104.1	Tupanvirus_isolate_sodalake	904208	937295
Nucleocytoviricota	Tupanvirus_isolate_sodalake.fasta	KY523104.1	Tupanvirus_isolate_sodalake	956044	1022666
Nucleocytoviricota	Tupanvirus_isolate_sodalake.fasta	KY523104.1	Tupanvirus_isolate_sodalake	1041415	1051527
Nucleocytoviricota	Tupanvirus_isolate_sodalake.fasta	KY523104.1	Tupanvirus_isolate_sodalake	1070276	1080982
Nucleocytoviricota	Tupanvirus_isolate_sodalake.fasta	KY523104.1	Tupanvirus_isolate_sodalake	1099731	1113790
Nucleocytoviricota	Tupanvirus_isolate_sodalake.fasta	KY523104.1	Tupanvirus_isolate_sodalake	1132539	1142913
Nucleocytoviricota	Tupanvirus_isolate_sodalake.fasta	KY523104.1	Tupanvirus_isolate_sodalake	1161662	1175241
Nucleocytoviricota	Tupanvirus_isolate_sodalake.fasta	KY523104.1	Tupanvirus_isolate_sodalake	1193990	1205088
Nucleocytoviricota	Tupanvirus_isolate_sodalake.fasta	KY523104.1	Tupanvirus_isolate_sodalake	1223837	1235340
Nucleocytoviricota	Tupanvirus_isolate_sodalake.fasta	KY523104.1	Tupanvirus_isolate_sodalake	1254089	1282248
Nucleocytoviricota	Tupanvirus_isolate_sodalake.fasta	KY523104.1	Tupanvirus_isolate_sodalake	1300997	1320341
Nucleocytoviricota	Tupanvirus_isolate_sodalake.fasta	KY523104.1	Tupanvirus_isolate_sodalake	1339090	1352051
Nucleocytoviricota	Tupanvirus_isolate_sodalake.fasta	KY523104.1	Tupanvirus_isolate_sodalake	1370800	1391674
Nucleocytoviricota	Tupanvirus_isolate_sodalake.fasta	KY523104.1	Tupanvirus_isolate_sodalake	1410423	1420754
Nucleocytoviricota	Wiseana_iridescent_virus.fasta	NC_015780.1	Wiseana_iridescent_virus	1	20604
Nucleocytoviricota	Wiseana_iridescent_virus.fasta	NC_015780.1	Wiseana_iridescent_virus	31382	111419
Nucleocytoviricota	Wiseana_iridescent_virus.fasta	NC_015780.1	Wiseana_iridescent_virus	122197	133137
Nucleocytoviricota	Wiseana_iridescent_virus.fasta	NC_015780.1	Wiseana_iridescent_virus	143915	195011
Archaea	GCA_000007065.1_ASM706v1_genomic.fna	AE008384.1	Methanosarcina mazei strain Goe1	1	13888
Archaea	GCA_000007065.1_ASM706v1_genomic.fna	AE008384.1	Methanosarcina mazei strain Goe1	136628	162281
Archaea	GCA_000007065.1_ASM706v1_genomic.fna	AE008384.1	Methanosarcina mazei strain Goe1	285021	305593
Archaea	GCA_000007065.1_ASM706v1_genomic.fna	AE008384.1	Methanosarcina mazei strain Goe1	428333	446384
Archaea	GCA_000007065.1_ASM706v1_genomic.fna	AE008384.1	Methanosarcina mazei strain Goe1	569124	581442
Archaea	GCA_000007065.1_ASM706v1_genomic.fna	AE008384.1	Methanosarcina mazei strain Goe1	704182	715258
Archaea	GCA_000007065.1_ASM706v1_genomic.fna	AE008384.1	Methanosarcina mazei strain Goe1	837998	849416
Archaea	GCA_000007065.1_ASM706v1_genomic.fna	AE008384.1	Methanosarcina mazei strain Goe1	972156	984283
Archaea	GCA_000007065.1_ASM706v1_genomic.fna	AE008384.1	Methanosarcina mazei strain Goe1	1107023	1119566
Archaea	GCA_000007065.1_ASM706v1_genomic.fna	AE008384.1	Methanosarcina mazei strain Goe1	1242306	1267124
Archaea	GCA_000007065.1_ASM706v1_genomic.fna	AE008384.1	Methanosarcina mazei strain Goe1	1389864	1485697
Archaea	GCA_000007065.1_ASM706v1_genomic.fna	AE008384.1	Methanosarcina mazei strain Goe1	1608437	1619550
Archaea	GCA_000007065.1_ASM706v1_genomic.fna	AE008384.1	Methanosarcina mazei strain Goe1	1742290	1753048
Archaea	GCA_000007065.1_ASM706v1_genomic.fna	AE008384.1	Methanosarcina mazei strain Goe1	1875788	1890887
Archaea	GCA_000007065.1_ASM706v1_genomic.fna	AE008384.1	Methanosarcina mazei strain Goe1	2013627	2039948
Archaea	GCA_000007065.1_ASM706v1_genomic.fna	AE008384.1	Methanosarcina mazei strain Goe1	2162688	2184002
Archaea	GCA_000007065.1_ASM706v1_genomic.fna	AE008384.1	Methanosarcina mazei strain Goe1	2306742	2318513
Archaea	GCA_000007065.1_ASM706v1_genomic.fna	AE008384.1	Methanosarcina mazei strain Goe1	2441253	2459854
Archaea	GCA_000007065.1_ASM706v1_genomic.fna	AE008384.1	Methanosarcina mazei strain Goe1	2582594	2597192
Archaea	GCA_000007065.1_ASM706v1_genomic.fna	AE008384.1	Methanosarcina mazei strain Goe1	2719932	2739556
Archaea	GCA_000007065.1_ASM706v1_genomic.fna	AE008384.1	Methanosarcina mazei strain Goe1	2862296	2875467
Archaea	GCA_000007065.1_ASM706v1_genomic.fna	AE008384.1	Methanosarcina mazei strain Goe1	2998207	3012711
Archaea	GCA_000007065.1_ASM706v1_genomic.fna	AE008384.1	Methanosarcina mazei strain Goe1	3135451	3146146
Archaea	GCA_000007065.1_ASM706v1_genomic.fna	AE008384.1	Methanosarcina mazei strain Goe1	3268886	3282805
Archaea	GCA_000007065.1_ASM706v1_genomic.fna	AE008384.1	Methanosarcina mazei strain Goe1	3405545	3418550
Archaea	GCA_000007065.1_ASM706v1_genomic.fna	AE008384.1	Methanosarcina mazei strain Goe1	3541290	3558541
Archaea	GCA_000007065.1_ASM706v1_genomic.fna	AE008384.1	Methanosarcina mazei strain Goe1	3681281	3701413
Archaea	GCA_000007065.1_ASM706v1_genomic.fna	AE008384.1	Methanosarcina mazei strain Goe1	3824153	3838985
Archaea	GCA_000007065.1_ASM706v1_genomic.fna	AE008384.1	Methanosarcina mazei strain Goe1	3961725	3973605
Archaea	GCA_000007185.1_ASM718v1_genomic.fna	AE009439.1	Methanopyrus kandleri AV19	1	25372
Archaea	GCA_000007185.1_ASM718v1_genomic.fna	AE009439.1	Methanopyrus kandleri AV19	61841	75847
Archaea	GCA_000007185.1_ASM718v1_genomic.fna	AE009439.1	Methanopyrus kandleri AV19	112316	146264
Archaea	GCA_000007185.1_ASM718v1_genomic.fna	AE009439.1	Methanopyrus kandleri AV19	182733	192813
Archaea	GCA_000007185.1_ASM718v1_genomic.fna	AE009439.1	Methanopyrus kandleri AV19	229282	247816
Archaea	GCA_000007185.1_ASM718v1_genomic.fna	AE009439.1	Methanopyrus kandleri AV19	284285	351996
Archaea	GCA_000007185.1_ASM718v1_genomic.fna	AE009439.1	Methanopyrus kandleri AV19	388465	431243
Archaea	GCA_000007185.1_ASM718v1_genomic.fna	AE009439.1	Methanopyrus kandleri AV19	467712	485302
Archaea	GCA_000007185.1_ASM718v1_genomic.fna	AE009439.1	Methanopyrus kandleri AV19	521771	541659
Archaea	GCA_000007185.1_ASM718v1_genomic.fna	AE009439.1	Methanopyrus kandleri AV19	578128	615952
Archaea	GCA_000007185.1_ASM718v1_genomic.fna	AE009439.1	Methanopyrus kandleri AV19	652421	664818
Archaea	GCA_000007185.1_ASM718v1_genomic.fna	AE009439.1	Methanopyrus kandleri AV19	701287	715440
Archaea	GCA_000007185.1_ASM718v1_genomic.fna	AE009439.1	Methanopyrus kandleri AV19	751909	763516
Archaea	GCA_000007185.1_ASM718v1_genomic.fna	AE009439.1	Methanopyrus kandleri AV19	799985	812604
Archaea	GCA_000007185.1_ASM718v1_genomic.fna	AE009439.1	Methanopyrus kandleri AV19	849073	861728
Archaea	GCA_000007185.1_ASM718v1_genomic.fna	AE009439.1	Methanopyrus kandleri AV19	898197	914288
Archaea	GCA_000007185.1_ASM718v1_genomic.fna	AE009439.1	Methanopyrus kandleri AV19	950757	970942
Archaea	GCA_000007185.1_ASM718v1_genomic.fna	AE009439.1	Methanopyrus kandleri AV19	1007411	1036272
Archaea	GCA_000007185.1_ASM718v1_genomic.fna	AE009439.1	Methanopyrus kandleri AV19	1072741	1088002
Archaea	GCA_000007185.1_ASM718v1_genomic.fna	AE009439.1	Methanopyrus kandleri AV19	1124471	1142181
Archaea	GCA_000007185.1_ASM718v1_genomic.fna	AE009439.1	Methanopyrus kandleri AV19	1178650	1225436
Archaea	GCA_000007185.1_ASM718v1_genomic.fna	AE009439.1	Methanopyrus kandleri AV19	1261905	1271929
Archaea	GCA_000007185.1_ASM718v1_genomic.fna	AE009439.1	Methanopyrus kandleri AV19	1308398	1334445
Archaea	GCA_000007185.1_ASM718v1_genomic.fna	AE009439.1	Methanopyrus kandleri AV19	1370914	1386137
Archaea	GCA_000007185.1_ASM718v1_genomic.fna	AE009439.1	Methanopyrus kandleri AV19	1422606	1433483
Archaea	GCA_000007185.1_ASM718v1_genomic.fna	AE009439.1	Methanopyrus kandleri AV19	1469952	1481243
Archaea	GCA_000007185.1_ASM718v1_genomic.fna	AE009439.1	Methanopyrus kandleri AV19	1517712	1564269
Archaea	GCA_000007185.1_ASM718v1_genomic.fna	AE009439.1	Methanopyrus kandleri AV19	1600738	1611123
Archaea	GCA_000007185.1_ASM718v1_genomic.fna	AE009439.1	Methanopyrus kandleri AV19	1647592	1658508
Archaea	GCA_000011125.1_ASM1112v1_genomic.fna	BA000002.3	Aeropyrum pernix K1 DNA	1	13062
Archaea	GCA_000011125.1_ASM1112v1_genomic.fna	BA000002.3	Aeropyrum pernix K1 DNA	52220	63740
Archaea	GCA_000011125.1_ASM1112v1_genomic.fna	BA000002.3	Aeropyrum pernix K1 DNA	102898	115613
Archaea	GCA_000011125.1_ASM1112v1_genomic.fna	BA000002.3	Aeropyrum pernix K1 DNA	154771	168730
Archaea	GCA_000011125.1_ASM1112v1_genomic.fna	BA000002.3	Aeropyrum pernix K1 DNA	207888	220448
Archaea	GCA_000011125.1_ASM1112v1_genomic.fna	BA000002.3	Aeropyrum pernix K1 DNA	259606	281515
Archaea	GCA_000011125.1_ASM1112v1_genomic.fna	BA000002.3	Aeropyrum pernix K1 DNA	320673	333352
Archaea	GCA_000011125.1_ASM1112v1_genomic.fna	BA000002.3	Aeropyrum pernix K1 DNA	372510	384039
Archaea	GCA_000011125.1_ASM1112v1_genomic.fna	BA000002.3	Aeropyrum pernix K1 DNA	423197	442934
Archaea	GCA_000011125.1_ASM1112v1_genomic.fna	BA000002.3	Aeropyrum pernix K1 DNA	482092	492625
Archaea	GCA_000011125.1_ASM1112v1_genomic.fna	BA000002.3	Aeropyrum pernix K1 DNA	531783	548328
Archaea	GCA_000011125.1_ASM1112v1_genomic.fna	BA000002.3	Aeropyrum pernix K1 DNA	587486	603739
Archaea	GCA_000011125.1_ASM1112v1_genomic.fna	BA000002.3	Aeropyrum pernix K1 DNA	642897	653803
Archaea	GCA_000011125.1_ASM1112v1_genomic.fna	BA000002.3	Aeropyrum pernix K1 DNA	692961	703963
Archaea	GCA_000011125.1_ASM1112v1_genomic.fna	BA000002.3	Aeropyrum pernix K1 DNA	743121	764219
Archaea	GCA_000011125.1_ASM1112v1_genomic.fna	BA000002.3	Aeropyrum pernix K1 DNA	803377	815931
Archaea	GCA_000011125.1_ASM1112v1_genomic.fna	BA000002.3	Aeropyrum pernix K1 DNA	855089	903083
Archaea	GCA_000011125.1_ASM1112v1_genomic.fna	BA000002.3	Aeropyrum pernix K1 DNA	942241	959589
Archaea	GCA_000011125.1_ASM1112v1_genomic.fna	BA000002.3	Aeropyrum pernix K1 DNA	998747	1011003
Archaea	GCA_000011125.1_ASM1112v1_genomic.fna	BA000002.3	Aeropyrum pernix K1 DNA	1050161	1083674
Archaea	GCA_000011125.1_ASM1112v1_genomic.fna	BA000002.3	Aeropyrum pernix K1 DNA	1122832	1138183
Archaea	GCA_000011125.1_ASM1112v1_genomic.fna	BA000002.3	Aeropyrum pernix K1 DNA	1177341	1233008
Archaea	GCA_000011125.1_ASM1112v1_genomic.fna	BA000002.3	Aeropyrum pernix K1 DNA	1272166	1284833
Archaea	GCA_000011125.1_ASM1112v1_genomic.fna	BA000002.3	Aeropyrum pernix K1 DNA	1323991	1361417
Archaea	GCA_000011125.1_ASM1112v1_genomic.fna	BA000002.3	Aeropyrum pernix K1 DNA	1400575	1417860
Archaea	GCA_000011125.1_ASM1112v1_genomic.fna	BA000002.3	Aeropyrum pernix K1 DNA	1457018	1468500
Archaea	GCA_000011125.1_ASM1112v1_genomic.fna	BA000002.3	Aeropyrum pernix K1 DNA	1507658	1519340
Archaea	GCA_000011125.1_ASM1112v1_genomic.fna	BA000002.3	Aeropyrum pernix K1 DNA	1558498	1573385
Archaea	GCA_000011125.1_ASM1112v1_genomic.fna	BA000002.3	Aeropyrum pernix K1 DNA	1612543	1630543
Archaea	GCA_000023965.1_ASM2396v1_genomic.fna	CP001688.1	Halomicrobium mukohataei DSM 12286	1	11544
Archaea	GCA_000023965.1_ASM2396v1_genomic.fna	CP001688.1	Halomicrobium mukohataei DSM 12286	100668	111516
Archaea	GCA_000023965.1_ASM2396v1_genomic.fna	CP001688.1	Halomicrobium mukohataei DSM 12286	200640	211138
Archaea	GCA_000023965.1_ASM2396v1_genomic.fna	CP001688.1	Halomicrobium mukohataei DSM 12286	300262	313843
Archaea	GCA_000023965.1_ASM2396v1_genomic.fna	CP001688.1	Halomicrobium mukohataei DSM 12286	402967	420930
Archaea	GCA_000023965.1_ASM2396v1_genomic.fna	CP001688.1	Halomicrobium mukohataei DSM 12286	510054	560593
Archaea	GCA_000023965.1_ASM2396v1_genomic.fna	CP001688.1	Halomicrobium mukohataei DSM 12286	649717	660020
Archaea	GCA_000023965.1_ASM2396v1_genomic.fna	CP001688.1	Halomicrobium mukohataei DSM 12286	749144	788833
Archaea	GCA_000023965.1_ASM2396v1_genomic.fna	CP001688.1	Halomicrobium mukohataei DSM 12286	877957	888592
Archaea	GCA_000023965.1_ASM2396v1_genomic.fna	CP001688.1	Halomicrobium mukohataei DSM 12286	977716	994753
Archaea	GCA_000023965.1_ASM2396v1_genomic.fna	CP001688.1	Halomicrobium mukohataei DSM 12286	1083877	1104930
Archaea	GCA_000023965.1_ASM2396v1_genomic.fna	CP001688.1	Halomicrobium mukohataei DSM 12286	1194054	1213754
Archaea	GCA_000023965.1_ASM2396v1_genomic.fna	CP001688.1	Halomicrobium mukohataei DSM 12286	1302878	1322858
Archaea	GCA_000023965.1_ASM2396v1_genomic.fna	CP001688.1	Halomicrobium mukohataei DSM 12286	1411982	1422861
Archaea	GCA_000023965.1_ASM2396v1_genomic.fna	CP001688.1	Halomicrobium mukohataei DSM 12286	1511985	1524565
Archaea	GCA_000023965.1_ASM2396v1_genomic.fna	CP001688.1	Halomicrobium mukohataei DSM 12286	1613689	1642406
Archaea	GCA_000023965.1_ASM2396v1_genomic.fna	CP001688.1	Halomicrobium mukohataei DSM 12286	1731530	1744126
Archaea	GCA_000023965.1_ASM2396v1_genomic.fna	CP001688.1	Halomicrobium mukohataei DSM 12286	1833250	1864663
Archaea	GCA_000023965.1_ASM2396v1_genomic.fna	CP001688.1	Halomicrobium mukohataei DSM 12286	1953787	1963798
Archaea	GCA_000023965.1_ASM2396v1_genomic.fna	CP001688.1	Halomicrobium mukohataei DSM 12286	2052922	2063147
Archaea	GCA_000023965.1_ASM2396v1_genomic.fna	CP001688.1	Halomicrobium mukohataei DSM 12286	2152271	2165681
Archaea	GCA_000023965.1_ASM2396v1_genomic.fna	CP001688.1	Halomicrobium mukohataei DSM 12286	2254805	2283154
Archaea	GCA_000023965.1_ASM2396v1_genomic.fna	CP001688.1	Halomicrobium mukohataei DSM 12286	2372278	2393776
Archaea	GCA_000023965.1_ASM2396v1_genomic.fna	CP001688.1	Halomicrobium mukohataei DSM 12286	2482900	2495713
Archaea	GCA_000023965.1_ASM2396v1_genomic.fna	CP001688.1	Halomicrobium mukohataei DSM 12286	2584837	2597928
Archaea	GCA_000023965.1_ASM2396v1_genomic.fna	CP001688.1	Halomicrobium mukohataei DSM 12286	2687052	2700393
Archaea	GCA_000023965.1_ASM2396v1_genomic.fna	CP001688.1	Halomicrobium mukohataei DSM 12286	2789517	2800273
Archaea	GCA_000023965.1_ASM2396v1_genomic.fna	CP001688.1	Halomicrobium mukohataei DSM 12286	2889397	2918070
Archaea	GCA_000023965.1_ASM2396v1_genomic.fna	CP001688.1	Halomicrobium mukohataei DSM 12286	3007194	3021372
Archaea	GCA_000024185.1_ASM2418v1_genomic.fna	CP001719.1	Methanobrevibacter ruminantium M1	1	80227
Archaea	GCA_000024185.1_ASM2418v1_genomic.fna	CP001719.1	Methanobrevibacter ruminantium M1	155049	165596
Archaea	GCA_000024185.1_ASM2418v1_genomic.fna	CP001719.1	Methanobrevibacter ruminantium M1	240418	254375
Archaea	GCA_000024185.1_ASM2418v1_genomic.fna	CP001719.1	Methanobrevibacter ruminantium M1	329197	495265
Archaea	GCA_000024185.1_ASM2418v1_genomic.fna	CP001719.1	Methanobrevibacter ruminantium M1	570087	581217
Archaea	GCA_000024185.1_ASM2418v1_genomic.fna	CP001719.1	Methanobrevibacter ruminantium M1	656039	674432
Archaea	GCA_000024185.1_ASM2418v1_genomic.fna	CP001719.1	Methanobrevibacter ruminantium M1	749254	801717
Archaea	GCA_000024185.1_ASM2418v1_genomic.fna	CP001719.1	Methanobrevibacter ruminantium M1	876539	936237
Archaea	GCA_000024185.1_ASM2418v1_genomic.fna	CP001719.1	Methanobrevibacter ruminantium M1	1011059	1023179
Archaea	GCA_000024185.1_ASM2418v1_genomic.fna	CP001719.1	Methanobrevibacter ruminantium M1	1098001	1108941
Archaea	GCA_000024185.1_ASM2418v1_genomic.fna	CP001719.1	Methanobrevibacter ruminantium M1	1183763	1208315
Archaea	GCA_000024185.1_ASM2418v1_genomic.fna	CP001719.1	Methanobrevibacter ruminantium M1	1283137	1294723
Archaea	GCA_000024185.1_ASM2418v1_genomic.fna	CP001719.1	Methanobrevibacter ruminantium M1	1369545	1381843
Archaea	GCA_000024185.1_ASM2418v1_genomic.fna	CP001719.1	Methanobrevibacter ruminantium M1	1456665	1468576
Archaea	GCA_000024185.1_ASM2418v1_genomic.fna	CP001719.1	Methanobrevibacter ruminantium M1	1543398	1556477
Archaea	GCA_000024185.1_ASM2418v1_genomic.fna	CP001719.1	Methanobrevibacter ruminantium M1	1631299	1646495
Archaea	GCA_000024185.1_ASM2418v1_genomic.fna	CP001719.1	Methanobrevibacter ruminantium M1	1721317	1733668
Archaea	GCA_000024185.1_ASM2418v1_genomic.fna	CP001719.1	Methanobrevibacter ruminantium M1	1808490	1829093
Archaea	GCA_000024185.1_ASM2418v1_genomic.fna	CP001719.1	Methanobrevibacter ruminantium M1	1903915	1922600
Archaea	GCA_000024185.1_ASM2418v1_genomic.fna	CP001719.1	Methanobrevibacter ruminantium M1	1997422	2019381
Archaea	GCA_000024185.1_ASM2418v1_genomic.fna	CP001719.1	Methanobrevibacter ruminantium M1	2094203	2113282
Archaea	GCA_000024185.1_ASM2418v1_genomic.fna	CP001719.1	Methanobrevibacter ruminantium M1	2188104	2198856
Archaea	GCA_000024185.1_ASM2418v1_genomic.fna	CP001719.1	Methanobrevibacter ruminantium M1	2273678	2285582
Archaea	GCA_000024185.1_ASM2418v1_genomic.fna	CP001719.1	Methanobrevibacter ruminantium M1	2360404	2386354
Archaea	GCA_000024185.1_ASM2418v1_genomic.fna	CP001719.1	Methanobrevibacter ruminantium M1	2461176	2489664
Archaea	GCA_000024185.1_ASM2418v1_genomic.fna	CP001719.1	Methanobrevibacter ruminantium M1	2564486	2578532
Archaea	GCA_000024185.1_ASM2418v1_genomic.fna	CP001719.1	Methanobrevibacter ruminantium M1	2653354	2666304
Archaea	GCA_000024185.1_ASM2418v1_genomic.fna	CP001719.1	Methanobrevibacter ruminantium M1	2741126	2764095
Archaea	GCA_000024185.1_ASM2418v1_genomic.fna	CP001719.1	Methanobrevibacter ruminantium M1	2838917	2862382
Archaea	GCA_000196895.1_ASM19689v1_genomic.fna	CP002062.1	Halalkalicoccus jeotgali B3	1	10683
Archaea	GCA_000196895.1_ASM19689v1_genomic.fna	CP002062.1	Halalkalicoccus jeotgali B3	91355	103816
Archaea	GCA_000196895.1_ASM19689v1_genomic.fna	CP002062.1	Halalkalicoccus jeotgali B3	184488	194915
Archaea	GCA_000196895.1_ASM19689v1_genomic.fna	CP002062.1	Halalkalicoccus jeotgali B3	275587	315922
Archaea	GCA_000196895.1_ASM19689v1_genomic.fna	CP002062.1	Halalkalicoccus jeotgali B3	396594	416865
Archaea	GCA_000196895.1_ASM19689v1_genomic.fna	CP002062.1	Halalkalicoccus jeotgali B3	497537	514013
Archaea	GCA_000196895.1_ASM19689v1_genomic.fna	CP002062.1	Halalkalicoccus jeotgali B3	594685	612151
Archaea	GCA_000196895.1_ASM19689v1_genomic.fna	CP002062.1	Halalkalicoccus jeotgali B3	692823	705655
Archaea	GCA_000196895.1_ASM19689v1_genomic.fna	CP002062.1	Halalkalicoccus jeotgali B3	786327	797497
Archaea	GCA_000196895.1_ASM19689v1_genomic.fna	CP002062.1	Halalkalicoccus jeotgali B3	878169	889745
Archaea	GCA_000196895.1_ASM19689v1_genomic.fna	CP002062.1	Halalkalicoccus jeotgali B3	970417	996335
Archaea	GCA_000196895.1_ASM19689v1_genomic.fna	CP002062.1	Halalkalicoccus jeotgali B3	1077007	1087236
Archaea	GCA_000196895.1_ASM19689v1_genomic.fna	CP002062.1	Halalkalicoccus jeotgali B3	1167908	1186327
Archaea	GCA_000196895.1_ASM19689v1_genomic.fna	CP002062.1	Halalkalicoccus jeotgali B3	1266999	1288404
Archaea	GCA_000196895.1_ASM19689v1_genomic.fna	CP002062.1	Halalkalicoccus jeotgali B3	1369076	1407978
Archaea	GCA_000196895.1_ASM19689v1_genomic.fna	CP002062.1	Halalkalicoccus jeotgali B3	1488650	1505566
Archaea	GCA_000196895.1_ASM19689v1_genomic.fna	CP002062.1	Halalkalicoccus jeotgali B3	1586238	1597284
Archaea	GCA_000196895.1_ASM19689v1_genomic.fna	CP002062.1	Halalkalicoccus jeotgali B3	1677956	1699849
Archaea	GCA_000196895.1_ASM19689v1_genomic.fna	CP002062.1	Halalkalicoccus jeotgali B3	1780521	1794378
Archaea	GCA_000196895.1_ASM19689v1_genomic.fna	CP002062.1	Halalkalicoccus jeotgali B3	1875050	1894958
Archaea	GCA_000196895.1_ASM19689v1_genomic.fna	CP002062.1	Halalkalicoccus jeotgali B3	1975630	1988005
Archaea	GCA_000196895.1_ASM19689v1_genomic.fna	CP002062.1	Halalkalicoccus jeotgali B3	2068677	2079422
Archaea	GCA_000196895.1_ASM19689v1_genomic.fna	CP002062.1	Halalkalicoccus jeotgali B3	2160094	2173015
Archaea	GCA_000196895.1_ASM19689v1_genomic.fna	CP002062.1	Halalkalicoccus jeotgali B3	2253687	2265246
Archaea	GCA_000196895.1_ASM19689v1_genomic.fna	CP002062.1	Halalkalicoccus jeotgali B3	2345918	2358978
Archaea	GCA_000196895.1_ASM19689v1_genomic.fna	CP002062.1	Halalkalicoccus jeotgali B3	2439650	2450568
Archaea	GCA_000196895.1_ASM19689v1_genomic.fna	CP002062.1	Halalkalicoccus jeotgali B3	2531240	2543868
Archaea	GCA_000196895.1_ASM19689v1_genomic.fna	CP002062.1	Halalkalicoccus jeotgali B3	2624540	2637054
Archaea	GCA_000196895.1_ASM19689v1_genomic.fna	CP002062.1	Halalkalicoccus jeotgali B3	2717726	2728458
Archaea	GCA_000220175.2_ASM22017v1_genomic.fna	AFPU01000001.1	Nitrosarchaeum koreense MY1 MY1	1	12551
Archaea	GCA_000220175.2_ASM22017v1_genomic.fna	AFPU01000001.1	Nitrosarchaeum koreense MY1 MY1	46530	58429
Archaea	GCA_000220175.2_ASM22017v1_genomic.fna	AFPU01000001.1	Nitrosarchaeum koreense MY1 MY1	92408	102503
Archaea	GCA_000220175.2_ASM22017v1_genomic.fna	AFPU01000001.1	Nitrosarchaeum koreense MY1 MY1	136482	155412
Archaea	GCA_000220175.2_ASM22017v1_genomic.fna	AFPU01000001.1	Nitrosarchaeum koreense MY1 MY1	189391	204911
Archaea	GCA_000220175.2_ASM22017v1_genomic.fna	AFPU01000001.1	Nitrosarchaeum koreense MY1 MY1	238890	252449
Archaea	GCA_000220175.2_ASM22017v1_genomic.fna	AFPU01000001.1	Nitrosarchaeum koreense MY1 MY1	286428	297840
Archaea	GCA_000220175.2_ASM22017v1_genomic.fna	AFPU01000001.1	Nitrosarchaeum koreense MY1 MY1	331819	343665
Archaea	GCA_000220175.2_ASM22017v1_genomic.fna	AFPU01000001.1	Nitrosarchaeum koreense MY1 MY1	377644	428891
Archaea	GCA_000220175.2_ASM22017v1_genomic.fna	AFPU01000001.1	Nitrosarchaeum koreense MY1 MY1	462870	473226
Archaea	GCA_000220175.2_ASM22017v1_genomic.fna	AFPU01000001.1	Nitrosarchaeum koreense MY1 MY1	507205	519596
Archaea	GCA_000220175.2_ASM22017v1_genomic.fna	AFPU01000001.1	Nitrosarchaeum koreense MY1 MY1	553575	575959
Archaea	GCA_000220175.2_ASM22017v1_genomic.fna	AFPU01000001.1	Nitrosarchaeum koreense MY1 MY1	609938	627299
Archaea	GCA_000220175.2_ASM22017v1_genomic.fna	AFPU01000001.1	Nitrosarchaeum koreense MY1 MY1	661278	672667
Archaea	GCA_000220175.2_ASM22017v1_genomic.fna	AFPU01000001.1	Nitrosarchaeum koreense MY1 MY1	706646	724659
Archaea	GCA_000220175.2_ASM22017v1_genomic.fna	AFPU01000001.1	Nitrosarchaeum koreense MY1 MY1	758638	846707
Archaea	GCA_000220175.2_ASM22017v1_genomic.fna	AFPU01000001.1	Nitrosarchaeum koreense MY1 MY1	880686	903616
Archaea	GCA_000220175.2_ASM22017v1_genomic.fna	AFPU01000001.1	Nitrosarchaeum koreense MY1 MY1	937595	991034
Archaea	GCA_000220175.2_ASM22017v1_genomic.fna	AFPU01000001.1	Nitrosarchaeum koreense MY1 MY1	1025013	1045159
Archaea	GCA_000220175.2_ASM22017v1_genomic.fna	AFPU01000001.1	Nitrosarchaeum koreense MY1 MY1	1079138	1098016
Archaea	GCA_000220175.2_ASM22017v1_genomic.fna	AFPU01000001.1	Nitrosarchaeum koreense MY1 MY1	1131995	1143677
Archaea	GCA_000220175.2_ASM22017v1_genomic.fna	AFPU01000001.1	Nitrosarchaeum koreense MY1 MY1	1177656	1191776
Archaea	GCA_000220175.2_ASM22017v1_genomic.fna	AFPU01000001.1	Nitrosarchaeum koreense MY1 MY1	1225755	1241679
Archaea	GCA_000220175.2_ASM22017v1_genomic.fna	AFPU01000001.1	Nitrosarchaeum koreense MY1 MY1	1275658	1287740
Archaea	GCA_000220175.2_ASM22017v1_genomic.fna	AFPU01000001.1	Nitrosarchaeum koreense MY1 MY1	1321719	1338711
Archaea	GCA_000220175.2_ASM22017v1_genomic.fna	AFPU01000001.1	Nitrosarchaeum koreense MY1 MY1	1372690	1392885
Archaea	GCA_000220175.2_ASM22017v1_genomic.fna	AFPU01000001.1	Nitrosarchaeum koreense MY1 MY1	1426864	1441952
Archaea	GCA_000220175.2_ASM22017v1_genomic.fna	AFPU01000001.1	Nitrosarchaeum koreense MY1 MY1	1475931	1505031
Archaea	GCA_000220175.2_ASM22017v1_genomic.fna	AFPU01000001.1	Nitrosarchaeum koreense MY1 MY1	1539010	1573704
Archaea	GCA_000258515.1_TheZil1.0_genomic.fna	AJLF01000001.1	Thermococcus zilligii AN1 TziAN1_1	1	11485
Archaea	GCA_000258515.1_TheZil1.0_genomic.fna	AJLF01000001.1	Thermococcus zilligii AN1 TziAN1_1	27780	38415
Archaea	GCA_000258515.1_TheZil1.0_genomic.fna	AJLF01000001.1	Thermococcus zilligii AN1 TziAN1_1	54710	118435
Archaea	GCA_000258515.1_TheZil1.0_genomic.fna	AJLF01000001.1	Thermococcus zilligii AN1 TziAN1_1	134730	152549
Archaea	GCA_000258515.1_TheZil1.0_genomic.fna	AJLF01000001.1	Thermococcus zilligii AN1 TziAN1_1	168844	199956
Archaea	GCA_000258515.1_TheZil1.0_genomic.fna	AJLF01000001.1	Thermococcus zilligii AN1 TziAN1_1	216251	279735
Archaea	GCA_000258515.1_TheZil1.0_genomic.fna	AJLF01000001.1	Thermococcus zilligii AN1 TziAN1_1	296030	307219
Archaea	GCA_000258515.1_TheZil1.0_genomic.fna	AJLF01000001.1	Thermococcus zilligii AN1 TziAN1_1	323514	341008
Archaea	GCA_000258515.1_TheZil1.0_genomic.fna	AJLF01000001.1	Thermococcus zilligii AN1 TziAN1_1	357303	370378
Archaea	GCA_000258515.1_TheZil1.0_genomic.fna	AJLF01000001.1	Thermococcus zilligii AN1 TziAN1_1	386673	401992
Archaea	GCA_000258515.1_TheZil1.0_genomic.fna	AJLF01000001.1	Thermococcus zilligii AN1 TziAN1_1	418287	429926
Archaea	GCA_000258515.1_TheZil1.0_genomic.fna	AJLF01000001.1	Thermococcus zilligii AN1 TziAN1_1	446221	458214
Archaea	GCA_000258515.1_TheZil1.0_genomic.fna	AJLF01000001.1	Thermococcus zilligii AN1 TziAN1_1	474509	496893
Archaea	GCA_000258515.1_TheZil1.0_genomic.fna	AJLF01000001.1	Thermococcus zilligii AN1 TziAN1_1	513188	525330
Archaea	GCA_000258515.1_TheZil1.0_genomic.fna	AJLF01000001.1	Thermococcus zilligii AN1 TziAN1_1	541625	557913
Archaea	GCA_000258515.1_TheZil1.0_genomic.fna	AJLF01000001.1	Thermococcus zilligii AN1 TziAN1_1	574208	586074
Archaea	GCA_000258515.1_TheZil1.0_genomic.fna	AJLF01000001.1	Thermococcus zilligii AN1 TziAN1_1	602369	644784
Archaea	GCA_000258515.1_TheZil1.0_genomic.fna	AJLF01000001.1	Thermococcus zilligii AN1 TziAN1_1	661079	671424
Archaea	GCA_000258515.1_TheZil1.0_genomic.fna	AJLF01000001.1	Thermococcus zilligii AN1 TziAN1_1	687719	709902
Archaea	GCA_000258515.1_TheZil1.0_genomic.fna	AJLF01000001.1	Thermococcus zilligii AN1 TziAN1_1	726197	739759
Archaea	GCA_000258515.1_TheZil1.0_genomic.fna	AJLF01000001.1	Thermococcus zilligii AN1 TziAN1_1	756054	778347
Archaea	GCA_000258515.1_TheZil1.0_genomic.fna	AJLF01000001.1	Thermococcus zilligii AN1 TziAN1_1	794642	805316
Archaea	GCA_000258515.1_TheZil1.0_genomic.fna	AJLF01000001.1	Thermococcus zilligii AN1 TziAN1_1	821611	835610
Archaea	GCA_000258515.1_TheZil1.0_genomic.fna	AJLF01000001.1	Thermococcus zilligii AN1 TziAN1_1	851905	863496
Archaea	GCA_000258515.1_TheZil1.0_genomic.fna	AJLF01000001.1	Thermococcus zilligii AN1 TziAN1_1	879791	904120
Archaea	GCA_000258515.1_TheZil1.0_genomic.fna	AJLF01000001.1	Thermococcus zilligii AN1 TziAN1_1	920415	934841
Archaea	GCA_000258515.1_TheZil1.0_genomic.fna	AJLF01000001.1	Thermococcus zilligii AN1 TziAN1_1	951136	962722
Archaea	GCA_000258515.1_TheZil1.0_genomic.fna	AJLF01000001.1	Thermococcus zilligii AN1 TziAN1_1	979017	1009461
Archaea	GCA_000258515.1_TheZil1.0_genomic.fna	AJLF01000001.1	Thermococcus zilligii AN1 TziAN1_1	1025756	1042334
Archaea	GCA_000336635.1_ASM33663v1_genomic.fna	AOLY01000037.1	Haloarcula japonica DSM 6131 contig_37	1	12711
Archaea	GCA_000336635.1_ASM33663v1_genomic.fna	AOLY01000037.1	Haloarcula japonica DSM 6131 contig_37	12937	160667
Archaea	GCA_000336635.1_ASM33663v1_genomic.fna	AOLY01000037.1	Haloarcula japonica DSM 6131 contig_37	160893	178511
Archaea	GCA_000336635.1_ASM33663v1_genomic.fna	AOLY01000037.1	Haloarcula japonica DSM 6131 contig_37	178737	194567
Archaea	GCA_000336635.1_ASM33663v1_genomic.fna	AOLY01000037.1	Haloarcula japonica DSM 6131 contig_37	194793	209297
Archaea	GCA_000336635.1_ASM33663v1_genomic.fna	AOLY01000037.1	Haloarcula japonica DSM 6131 contig_37	209523	268426
Archaea	GCA_000336635.1_ASM33663v1_genomic.fna	AOLY01000037.1	Haloarcula japonica DSM 6131 contig_37	268652	289100
Archaea	GCA_000336635.1_ASM33663v1_genomic.fna	AOLY01000037.1	Haloarcula japonica DSM 6131 contig_37	289326	351071
Archaea	GCA_000336635.1_ASM33663v1_genomic.fna	AOLY01000037.1	Haloarcula japonica DSM 6131 contig_37	351297	379477
Archaea	GCA_000336635.1_ASM33663v1_genomic.fna	AOLY01000037.1	Haloarcula japonica DSM 6131 contig_37	379703	396647
Archaea	GCA_000336635.1_ASM33663v1_genomic.fna	AOLY01000037.1	Haloarcula japonica DSM 6131 contig_37	396873	408140
Archaea	GCA_000336635.1_ASM33663v1_genomic.fna	AOLY01000037.1	Haloarcula japonica DSM 6131 contig_37	408366	430919
Archaea	GCA_000336635.1_ASM33663v1_genomic.fna	AOLY01000037.1	Haloarcula japonica DSM 6131 contig_37	431145	446085
Archaea	GCA_000336635.1_ASM33663v1_genomic.fna	AOLY01000037.1	Haloarcula japonica DSM 6131 contig_37	446311	465869
Archaea	GCA_000336635.1_ASM33663v1_genomic.fna	AOLY01000037.1	Haloarcula japonica DSM 6131 contig_37	466095	503136
Archaea	GCA_000336635.1_ASM33663v1_genomic.fna	AOLY01000037.1	Haloarcula japonica DSM 6131 contig_37	503362	516066
Archaea	GCA_000336635.1_ASM33663v1_genomic.fna	AOLY01000037.1	Haloarcula japonica DSM 6131 contig_37	516292	528727
Archaea	GCA_000336635.1_ASM33663v1_genomic.fna	AOLY01000037.1	Haloarcula japonica DSM 6131 contig_37	528953	551981
Archaea	GCA_000337195.1_ASM33719v1_genomic.fna	AOID01000005.1	Natrinema versiforme JCM 10478 contig_5	1	18996
Archaea	GCA_000337195.1_ASM33719v1_genomic.fna	AOID01000005.1	Natrinema versiforme JCM 10478 contig_5	20512	44225
Archaea	GCA_000337195.1_ASM33719v1_genomic.fna	AOID01000005.1	Natrinema versiforme JCM 10478 contig_5	45741	65901
Archaea	GCA_000337195.1_ASM33719v1_genomic.fna	AOID01000005.1	Natrinema versiforme JCM 10478 contig_5	67417	124236
Archaea	GCA_000337195.1_ASM33719v1_genomic.fna	AOID01000005.1	Natrinema versiforme JCM 10478 contig_5	125752	136979
Archaea	GCA_000337195.1_ASM33719v1_genomic.fna	AOID01000005.1	Natrinema versiforme JCM 10478 contig_5	138495	153355
Archaea	GCA_000337195.1_ASM33719v1_genomic.fna	AOID01000005.1	Natrinema versiforme JCM 10478 contig_5	154871	191034
Archaea	GCA_000337195.1_ASM33719v1_genomic.fna	AOID01000005.1	Natrinema versiforme JCM 10478 contig_5	192550	208173
Archaea	GCA_000337195.1_ASM33719v1_genomic.fna	AOID01000005.1	Natrinema versiforme JCM 10478 contig_5	209689	232136
Archaea	GCA_000337355.1_ASM33735v1_genomic.fna	AOJH01000043.1	Halorubrum kocurii JCM 14978 contig_43	1	21093
Archaea	GCA_000337355.1_ASM33735v1_genomic.fna	AOJH01000043.1	Halorubrum kocurii JCM 14978 contig_43	25837	60782
Archaea	GCA_000337355.1_ASM33735v1_genomic.fna	AOJH01000043.1	Halorubrum kocurii JCM 14978 contig_43	65526	99647
Archaea	GCA_000337355.1_ASM33735v1_genomic.fna	AOJH01000043.1	Halorubrum kocurii JCM 14978 contig_43	104391	143695
Archaea	GCA_000337355.1_ASM33735v1_genomic.fna	AOJH01000043.1	Halorubrum kocurii JCM 14978 contig_43	148439	171868
Archaea	GCA_000337355.1_ASM33735v1_genomic.fna	AOJH01000043.1	Halorubrum kocurii JCM 14978 contig_43	176612	188050
Archaea	GCA_000337355.1_ASM33735v1_genomic.fna	AOJH01000043.1	Halorubrum kocurii JCM 14978 contig_43	192794	207152
Archaea	GCA_000337755.1_ASM33775v1_genomic.fna	AOLS01000062.1	Haloarcula californiae ATCC 33799 contig_62	1	15556
Archaea	GCA_000337755.1_ASM33775v1_genomic.fna	AOLS01000062.1	Haloarcula californiae ATCC 33799 contig_62	16552	27862
Archaea	GCA_000337755.1_ASM33775v1_genomic.fna	AOLS01000062.1	Haloarcula californiae ATCC 33799 contig_62	28858	55726
Archaea	GCA_000337755.1_ASM33775v1_genomic.fna	AOLS01000062.1	Haloarcula californiae ATCC 33799 contig_62	56722	69905
Archaea	GCA_000337755.1_ASM33775v1_genomic.fna	AOLS01000062.1	Haloarcula californiae ATCC 33799 contig_62	70901	82922
Archaea	GCA_000337755.1_ASM33775v1_genomic.fna	AOLS01000062.1	Haloarcula californiae ATCC 33799 contig_62	83918	112556
Archaea	GCA_000337755.1_ASM33775v1_genomic.fna	AOLS01000062.1	Haloarcula californiae ATCC 33799 contig_62	113552	124935
Archaea	GCA_000337755.1_ASM33775v1_genomic.fna	AOLS01000062.1	Haloarcula californiae ATCC 33799 contig_62	125931	136315
Archaea	GCA_000337755.1_ASM33775v1_genomic.fna	AOLS01000062.1	Haloarcula californiae ATCC 33799 contig_62	137311	165491
Archaea	GCA_000337755.1_ASM33775v1_genomic.fna	AOLS01000062.1	Haloarcula californiae ATCC 33799 contig_62	166487	180701
Archaea	GCA_000337755.1_ASM33775v1_genomic.fna	AOLS01000062.1	Haloarcula californiae ATCC 33799 contig_62	181697	229773
Archaea	GCA_000337755.1_ASM33775v1_genomic.fna	AOLS01000062.1	Haloarcula californiae ATCC 33799 contig_62	230769	241834
Archaea	GCA_000337755.1_ASM33775v1_genomic.fna	AOLS01000062.1	Haloarcula californiae ATCC 33799 contig_62	242830	260759
Archaea	GCA_000337755.1_ASM33775v1_genomic.fna	AOLS01000062.1	Haloarcula californiae ATCC 33799 contig_62	261755	290616
Archaea	GCA_000337755.1_ASM33775v1_genomic.fna	AOLS01000062.1	Haloarcula californiae ATCC 33799 contig_62	291612	301675
Archaea	GCA_000337755.1_ASM33775v1_genomic.fna	AOLS01000062.1	Haloarcula californiae ATCC 33799 contig_62	302671	366479
Archaea	GCA_000337755.1_ASM33775v1_genomic.fna	AOLS01000062.1	Haloarcula californiae ATCC 33799 contig_62	367475	378494
Archaea	GCA_000337755.1_ASM33775v1_genomic.fna	AOLS01000062.1	Haloarcula californiae ATCC 33799 contig_62	379490	395947
Archaea	GCA_000337755.1_ASM33775v1_genomic.fna	AOLS01000062.1	Haloarcula californiae ATCC 33799 contig_62	396943	410099
Archaea	GCA_000337755.1_ASM33775v1_genomic.fna	AOLS01000062.1	Haloarcula californiae ATCC 33799 contig_62	411095	457874
Archaea	GCA_000337755.1_ASM33775v1_genomic.fna	AOLS01000062.1	Haloarcula californiae ATCC 33799 contig_62	458870	489661
Archaea	GCA_000621965.1_ASM62196v1_genomic.fna	KK211375.1	Methanobrevibacter wolinii SH genomic scaffold T523DRAFT_scaffold00001.1	1	28638
Archaea	GCA_000621965.1_ASM62196v1_genomic.fna	KK211375.1	Methanobrevibacter wolinii SH genomic scaffold T523DRAFT_scaffold00001.1	41358	51548
Archaea	GCA_000621965.1_ASM62196v1_genomic.fna	KK211375.1	Methanobrevibacter wolinii SH genomic scaffold T523DRAFT_scaffold00001.1	64268	84293
Archaea	GCA_000621965.1_ASM62196v1_genomic.fna	KK211375.1	Methanobrevibacter wolinii SH genomic scaffold T523DRAFT_scaffold00001.1	97013	108553
Archaea	GCA_000621965.1_ASM62196v1_genomic.fna	KK211375.1	Methanobrevibacter wolinii SH genomic scaffold T523DRAFT_scaffold00001.1	121273	133091
Archaea	GCA_000621965.1_ASM62196v1_genomic.fna	KK211375.1	Methanobrevibacter wolinii SH genomic scaffold T523DRAFT_scaffold00001.1	145811	289934
Archaea	GCA_000621965.1_ASM62196v1_genomic.fna	KK211375.1	Methanobrevibacter wolinii SH genomic scaffold T523DRAFT_scaffold00001.1	302654	315803
Archaea	GCA_000731985.1_ASM73198v1_genomic.fna	JNCS01000001.1	Natrinema altunense strain AJ2 N_altunense_AJ2_contig_1	1	52123
Archaea	GCA_000731985.1_ASM73198v1_genomic.fna	JNCS01000001.1	Natrinema altunense strain AJ2 N_altunense_AJ2_contig_1	62883	75244
Archaea	GCA_000731985.1_ASM73198v1_genomic.fna	JNCS01000001.1	Natrinema altunense strain AJ2 N_altunense_AJ2_contig_1	86004	111219
Archaea	GCA_000731985.1_ASM73198v1_genomic.fna	JNCS01000001.1	Natrinema altunense strain AJ2 N_altunense_AJ2_contig_1	121979	142411
Archaea	GCA_000731985.1_ASM73198v1_genomic.fna	JNCS01000001.1	Natrinema altunense strain AJ2 N_altunense_AJ2_contig_1	153171	171494
Archaea	GCA_000731985.1_ASM73198v1_genomic.fna	JNCS01000001.1	Natrinema altunense strain AJ2 N_altunense_AJ2_contig_1	182254	192450
Archaea	GCA_000731985.1_ASM73198v1_genomic.fna	JNCS01000001.1	Natrinema altunense strain AJ2 N_altunense_AJ2_contig_1	203210	214853
Archaea	GCA_000731985.1_ASM73198v1_genomic.fna	JNCS01000001.1	Natrinema altunense strain AJ2 N_altunense_AJ2_contig_1	225613	291735
Archaea	GCA_000731985.1_ASM73198v1_genomic.fna	JNCS01000001.1	Natrinema altunense strain AJ2 N_altunense_AJ2_contig_1	302495	312837
Archaea	GCA_000731985.1_ASM73198v1_genomic.fna	JNCS01000001.1	Natrinema altunense strain AJ2 N_altunense_AJ2_contig_1	323597	334782
Archaea	GCA_000731985.1_ASM73198v1_genomic.fna	JNCS01000001.1	Natrinema altunense strain AJ2 N_altunense_AJ2_contig_1	345542	355684
Archaea	GCA_000731985.1_ASM73198v1_genomic.fna	JNCS01000001.1	Natrinema altunense strain AJ2 N_altunense_AJ2_contig_1	366444	382308
Archaea	GCA_000731985.1_ASM73198v1_genomic.fna	JNCS01000001.1	Natrinema altunense strain AJ2 N_altunense_AJ2_contig_1	393068	410238
Archaea	GCA_000731985.1_ASM73198v1_genomic.fna	JNCS01000001.1	Natrinema altunense strain AJ2 N_altunense_AJ2_contig_1	420998	438513
Archaea	GCA_000731985.1_ASM73198v1_genomic.fna	JNCS01000001.1	Natrinema altunense strain AJ2 N_altunense_AJ2_contig_1	449273	459889
Archaea	GCA_000731985.1_ASM73198v1_genomic.fna	JNCS01000001.1	Natrinema altunense strain AJ2 N_altunense_AJ2_contig_1	470649	482535
Archaea	GCA_000731985.1_ASM73198v1_genomic.fna	JNCS01000001.1	Natrinema altunense strain AJ2 N_altunense_AJ2_contig_1	493295	504627
Archaea	GCA_000731985.1_ASM73198v1_genomic.fna	JNCS01000001.1	Natrinema altunense strain AJ2 N_altunense_AJ2_contig_1	515387	532932
Archaea	GCA_000731985.1_ASM73198v1_genomic.fna	JNCS01000001.1	Natrinema altunense strain AJ2 N_altunense_AJ2_contig_1	543692	562417
Archaea	GCA_000731985.1_ASM73198v1_genomic.fna	JNCS01000001.1	Natrinema altunense strain AJ2 N_altunense_AJ2_contig_1	573177	583724
Archaea	GCA_000731985.1_ASM73198v1_genomic.fna	JNCS01000001.1	Natrinema altunense strain AJ2 N_altunense_AJ2_contig_1	594484	605083
Archaea	GCA_000731985.1_ASM73198v1_genomic.fna	JNCS01000001.1	Natrinema altunense strain AJ2 N_altunense_AJ2_contig_1	615843	628814
Archaea	GCA_000731985.1_ASM73198v1_genomic.fna	JNCS01000001.1	Natrinema altunense strain AJ2 N_altunense_AJ2_contig_1	639574	672854
Archaea	GCA_000731985.1_ASM73198v1_genomic.fna	JNCS01000001.1	Natrinema altunense strain AJ2 N_altunense_AJ2_contig_1	683614	711854
Archaea	GCA_000731985.1_ASM73198v1_genomic.fna	JNCS01000001.1	Natrinema altunense strain AJ2 N_altunense_AJ2_contig_1	722614	739552
Archaea	GCA_000731985.1_ASM73198v1_genomic.fna	JNCS01000001.1	Natrinema altunense strain AJ2 N_altunense_AJ2_contig_1	750312	760448
Archaea	GCA_000731985.1_ASM73198v1_genomic.fna	JNCS01000001.1	Natrinema altunense strain AJ2 N_altunense_AJ2_contig_1	771208	781599
Archaea	GCA_000731985.1_ASM73198v1_genomic.fna	JNCS01000001.1	Natrinema altunense strain AJ2 N_altunense_AJ2_contig_1	792359	803849
Archaea	GCA_000731985.1_ASM73198v1_genomic.fna	JNCS01000001.1	Natrinema altunense strain AJ2 N_altunense_AJ2_contig_1	814609	826784
Archaea	GCA_000765475.1_Mmet_Version1_genomic.fna	JRHO01000014.1	Methanococcoides methylutens strain DSM 2657 Mm2657_contig14	1	10196
Archaea	GCA_000765475.1_Mmet_Version1_genomic.fna	JRHO01000014.1	Methanococcoides methylutens strain DSM 2657 Mm2657_contig14	20805	32734
Archaea	GCA_000765475.1_Mmet_Version1_genomic.fna	JRHO01000014.1	Methanococcoides methylutens strain DSM 2657 Mm2657_contig14	43343	60346
Archaea	GCA_000765475.1_Mmet_Version1_genomic.fna	JRHO01000014.1	Methanococcoides methylutens strain DSM 2657 Mm2657_contig14	70955	112036
Archaea	GCA_000765475.1_Mmet_Version1_genomic.fna	JRHO01000014.1	Methanococcoides methylutens strain DSM 2657 Mm2657_contig14	122645	134700
Archaea	GCA_000765475.1_Mmet_Version1_genomic.fna	JRHO01000014.1	Methanococcoides methylutens strain DSM 2657 Mm2657_contig14	145309	204290
Archaea	GCA_000765475.1_Mmet_Version1_genomic.fna	JRHO01000014.1	Methanococcoides methylutens strain DSM 2657 Mm2657_contig14	214899	225028
Archaea	GCA_000765475.1_Mmet_Version1_genomic.fna	JRHO01000014.1	Methanococcoides methylutens strain DSM 2657 Mm2657_contig14	235637	246375
Archaea	GCA_000765475.1_Mmet_Version1_genomic.fna	JRHO01000014.1	Methanococcoides methylutens strain DSM 2657 Mm2657_contig14	256984	271220
Archaea	GCA_000765475.1_Mmet_Version1_genomic.fna	JRHO01000014.1	Methanococcoides methylutens strain DSM 2657 Mm2657_contig14	281829	325330
Archaea	GCA_000765475.1_Mmet_Version1_genomic.fna	JRHO01000014.1	Methanococcoides methylutens strain DSM 2657 Mm2657_contig14	335939	347168
Archaea	GCA_000765475.1_Mmet_Version1_genomic.fna	JRHO01000014.1	Methanococcoides methylutens strain DSM 2657 Mm2657_contig14	357777	367931
Archaea	GCA_000765475.1_Mmet_Version1_genomic.fna	JRHO01000014.1	Methanococcoides methylutens strain DSM 2657 Mm2657_contig14	378540	405380
Archaea	GCA_000765475.1_Mmet_Version1_genomic.fna	JRHO01000014.1	Methanococcoides methylutens strain DSM 2657 Mm2657_contig14	415989	439219
Archaea	GCA_000765475.1_Mmet_Version1_genomic.fna	JRHO01000014.1	Methanococcoides methylutens strain DSM 2657 Mm2657_contig14	449828	469818
Archaea	GCA_000765475.1_Mmet_Version1_genomic.fna	JRHO01000014.1	Methanococcoides methylutens strain DSM 2657 Mm2657_contig14	480427	515231
Archaea	GCA_000765475.1_Mmet_Version1_genomic.fna	JRHO01000014.1	Methanococcoides methylutens strain DSM 2657 Mm2657_contig14	525840	537576
Archaea	GCA_000765475.1_Mmet_Version1_genomic.fna	JRHO01000014.1	Methanococcoides methylutens strain DSM 2657 Mm2657_contig14	548185	558800
Archaea	GCA_000765475.1_Mmet_Version1_genomic.fna	JRHO01000014.1	Methanococcoides methylutens strain DSM 2657 Mm2657_contig14	569409	589174
Archaea	GCA_000765475.1_Mmet_Version1_genomic.fna	JRHO01000014.1	Methanococcoides methylutens strain DSM 2657 Mm2657_contig14	599783	610885
Archaea	GCA_000765475.1_Mmet_Version1_genomic.fna	JRHO01000014.1	Methanococcoides methylutens strain DSM 2657 Mm2657_contig14	621494	636180
Archaea	GCA_000765475.1_Mmet_Version1_genomic.fna	JRHO01000014.1	Methanococcoides methylutens strain DSM 2657 Mm2657_contig14	646789	656845
Archaea	GCA_000765475.1_Mmet_Version1_genomic.fna	JRHO01000014.1	Methanococcoides methylutens strain DSM 2657 Mm2657_contig14	667454	814681
Archaea	GCA_000765475.1_Mmet_Version1_genomic.fna	JRHO01000014.1	Methanococcoides methylutens strain DSM 2657 Mm2657_contig14	825290	835907
Archaea	GCA_000765475.1_Mmet_Version1_genomic.fna	JRHO01000014.1	Methanococcoides methylutens strain DSM 2657 Mm2657_contig14	846516	864204
Archaea	GCA_000765475.1_Mmet_Version1_genomic.fna	JRHO01000014.1	Methanococcoides methylutens strain DSM 2657 Mm2657_contig14	874813	889208
Archaea	GCA_000765475.1_Mmet_Version1_genomic.fna	JRHO01000014.1	Methanococcoides methylutens strain DSM 2657 Mm2657_contig14	899817	922683
Archaea	GCA_000765475.1_Mmet_Version1_genomic.fna	JRHO01000014.1	Methanococcoides methylutens strain DSM 2657 Mm2657_contig14	933292	970774
Archaea	GCA_000765475.1_Mmet_Version1_genomic.fna	JRHO01000014.1	Methanococcoides methylutens strain DSM 2657 Mm2657_contig14	981383	992383
Archaea	GCA_000956175.1_ASM95617v1_genomic.fna	CP011070.1	Nitrosopumilus adriaticus strain NF5 chromosome	1	14403
Archaea	GCA_000956175.1_ASM95617v1_genomic.fna	CP011070.1	Nitrosopumilus adriaticus strain NF5 chromosome	51509	65555
Archaea	GCA_000956175.1_ASM95617v1_genomic.fna	CP011070.1	Nitrosopumilus adriaticus strain NF5 chromosome	102661	151282
Archaea	GCA_000956175.1_ASM95617v1_genomic.fna	CP011070.1	Nitrosopumilus adriaticus strain NF5 chromosome	188388	198997
Archaea	GCA_000956175.1_ASM95617v1_genomic.fna	CP011070.1	Nitrosopumilus adriaticus strain NF5 chromosome	236103	297788
Archaea	GCA_000956175.1_ASM95617v1_genomic.fna	CP011070.1	Nitrosopumilus adriaticus strain NF5 chromosome	334894	353107
Archaea	GCA_000956175.1_ASM95617v1_genomic.fna	CP011070.1	Nitrosopumilus adriaticus strain NF5 chromosome	390213	493332
Archaea	GCA_000956175.1_ASM95617v1_genomic.fna	CP011070.1	Nitrosopumilus adriaticus strain NF5 chromosome	530438	542589
Archaea	GCA_000956175.1_ASM95617v1_genomic.fna	CP011070.1	Nitrosopumilus adriaticus strain NF5 chromosome	579695	590606
Archaea	GCA_000956175.1_ASM95617v1_genomic.fna	CP011070.1	Nitrosopumilus adriaticus strain NF5 chromosome	627712	778423
Archaea	GCA_000956175.1_ASM95617v1_genomic.fna	CP011070.1	Nitrosopumilus adriaticus strain NF5 chromosome	815529	829392
Archaea	GCA_000956175.1_ASM95617v1_genomic.fna	CP011070.1	Nitrosopumilus adriaticus strain NF5 chromosome	866498	876533
Archaea	GCA_000956175.1_ASM95617v1_genomic.fna	CP011070.1	Nitrosopumilus adriaticus strain NF5 chromosome	913639	924043
Archaea	GCA_000956175.1_ASM95617v1_genomic.fna	CP011070.1	Nitrosopumilus adriaticus strain NF5 chromosome	961149	987564
Archaea	GCA_000956175.1_ASM95617v1_genomic.fna	CP011070.1	Nitrosopumilus adriaticus strain NF5 chromosome	1024670	1044407
Archaea	GCA_000956175.1_ASM95617v1_genomic.fna	CP011070.1	Nitrosopumilus adriaticus strain NF5 chromosome	1081513	1098439
Archaea	GCA_000956175.1_ASM95617v1_genomic.fna	CP011070.1	Nitrosopumilus adriaticus strain NF5 chromosome	1135545	1145994
Archaea	GCA_000956175.1_ASM95617v1_genomic.fna	CP011070.1	Nitrosopumilus adriaticus strain NF5 chromosome	1183100	1193242
Archaea	GCA_000956175.1_ASM95617v1_genomic.fna	CP011070.1	Nitrosopumilus adriaticus strain NF5 chromosome	1230348	1246198
Archaea	GCA_000956175.1_ASM95617v1_genomic.fna	CP011070.1	Nitrosopumilus adriaticus strain NF5 chromosome	1283304	1293581
Archaea	GCA_000956175.1_ASM95617v1_genomic.fna	CP011070.1	Nitrosopumilus adriaticus strain NF5 chromosome	1330687	1341560
Archaea	GCA_000956175.1_ASM95617v1_genomic.fna	CP011070.1	Nitrosopumilus adriaticus strain NF5 chromosome	1378666	1393834
Archaea	GCA_000956175.1_ASM95617v1_genomic.fna	CP011070.1	Nitrosopumilus adriaticus strain NF5 chromosome	1430940	1441978
Archaea	GCA_000956175.1_ASM95617v1_genomic.fna	CP011070.1	Nitrosopumilus adriaticus strain NF5 chromosome	1479084	1495217
Archaea	GCA_000956175.1_ASM95617v1_genomic.fna	CP011070.1	Nitrosopumilus adriaticus strain NF5 chromosome	1532323	1549246
Archaea	GCA_000956175.1_ASM95617v1_genomic.fna	CP011070.1	Nitrosopumilus adriaticus strain NF5 chromosome	1586352	1603378
Archaea	GCA_000956175.1_ASM95617v1_genomic.fna	CP011070.1	Nitrosopumilus adriaticus strain NF5 chromosome	1640484	1657689
Archaea	GCA_000956175.1_ASM95617v1_genomic.fna	CP011070.1	Nitrosopumilus adriaticus strain NF5 chromosome	1694795	1717084
Archaea	GCA_000956175.1_ASM95617v1_genomic.fna	CP011070.1	Nitrosopumilus adriaticus strain NF5 chromosome	1754190	1765996
Archaea	GCA_000969905.1_ASM96990v1_genomic.fna	CP009520.1	Methanosarcina vacuolata Z-761	1	15051
Archaea	GCA_000969905.1_ASM96990v1_genomic.fna	CP009520.1	Methanosarcina vacuolata Z-761	149849	171480
Archaea	GCA_000969905.1_ASM96990v1_genomic.fna	CP009520.1	Methanosarcina vacuolata Z-761	306278	322455
Archaea	GCA_000969905.1_ASM96990v1_genomic.fna	CP009520.1	Methanosarcina vacuolata Z-761	457253	473534
Archaea	GCA_000969905.1_ASM96990v1_genomic.fna	CP009520.1	Methanosarcina vacuolata Z-761	608332	622967
Archaea	GCA_000969905.1_ASM96990v1_genomic.fna	CP009520.1	Methanosarcina vacuolata Z-761	757765	774355
Archaea	GCA_000969905.1_ASM96990v1_genomic.fna	CP009520.1	Methanosarcina vacuolata Z-761	909153	920305
Archaea	GCA_000969905.1_ASM96990v1_genomic.fna	CP009520.1	Methanosarcina vacuolata Z-761	1055103	1074000
Archaea	GCA_000969905.1_ASM96990v1_genomic.fna	CP009520.1	Methanosarcina vacuolata Z-761	1208798	1222591
Archaea	GCA_000969905.1_ASM96990v1_genomic.fna	CP009520.1	Methanosarcina vacuolata Z-761	1357389	1367657
Archaea	GCA_000969905.1_ASM96990v1_genomic.fna	CP009520.1	Methanosarcina vacuolata Z-761	1502455	1516873
Archaea	GCA_000969905.1_ASM96990v1_genomic.fna	CP009520.1	Methanosarcina vacuolata Z-761	1651671	1662375
Archaea	GCA_000969905.1_ASM96990v1_genomic.fna	CP009520.1	Methanosarcina vacuolata Z-761	1797173	1808849
Archaea	GCA_000969905.1_ASM96990v1_genomic.fna	CP009520.1	Methanosarcina vacuolata Z-761	1943647	1967087
Archaea	GCA_000969905.1_ASM96990v1_genomic.fna	CP009520.1	Methanosarcina vacuolata Z-761	2101885	2133048
Archaea	GCA_000969905.1_ASM96990v1_genomic.fna	CP009520.1	Methanosarcina vacuolata Z-761	2267846	2284139
Archaea	GCA_000969905.1_ASM96990v1_genomic.fna	CP009520.1	Methanosarcina vacuolata Z-761	2418937	2432462
Archaea	GCA_000969905.1_ASM96990v1_genomic.fna	CP009520.1	Methanosarcina vacuolata Z-761	2567260	2577292
Archaea	GCA_000969905.1_ASM96990v1_genomic.fna	CP009520.1	Methanosarcina vacuolata Z-761	2712090	2730423
Archaea	GCA_000969905.1_ASM96990v1_genomic.fna	CP009520.1	Methanosarcina vacuolata Z-761	2865221	2875656
Archaea	GCA_000969905.1_ASM96990v1_genomic.fna	CP009520.1	Methanosarcina vacuolata Z-761	3010454	3023108
Archaea	GCA_000969905.1_ASM96990v1_genomic.fna	CP009520.1	Methanosarcina vacuolata Z-761	3157906	3177331
Archaea	GCA_000969905.1_ASM96990v1_genomic.fna	CP009520.1	Methanosarcina vacuolata Z-761	3312129	3450603
Archaea	GCA_000969905.1_ASM96990v1_genomic.fna	CP009520.1	Methanosarcina vacuolata Z-761	3585401	3595791
Archaea	GCA_000969905.1_ASM96990v1_genomic.fna	CP009520.1	Methanosarcina vacuolata Z-761	3730589	3741922
Archaea	GCA_000969905.1_ASM96990v1_genomic.fna	CP009520.1	Methanosarcina vacuolata Z-761	3876720	3923602
Archaea	GCA_000969905.1_ASM96990v1_genomic.fna	CP009520.1	Methanosarcina vacuolata Z-761	4058400	4069556
Archaea	GCA_000969905.1_ASM96990v1_genomic.fna	CP009520.1	Methanosarcina vacuolata Z-761	4204354	4223528
Archaea	GCA_000969905.1_ASM96990v1_genomic.fna	CP009520.1	Methanosarcina vacuolata Z-761	4358326	4370968
Archaea	GCA_001190965.1_ASM119096v1_genomic.fna	CP011947.1	Haloferax gibbonsii strain ARA6	1	12345
Archaea	GCA_001190965.1_ASM119096v1_genomic.fna	CP011947.1	Haloferax gibbonsii strain ARA6	88952	104131
Archaea	GCA_001190965.1_ASM119096v1_genomic.fna	CP011947.1	Haloferax gibbonsii strain ARA6	180738	241315
Archaea	GCA_001190965.1_ASM119096v1_genomic.fna	CP011947.1	Haloferax gibbonsii strain ARA6	317922	335035
Archaea	GCA_001190965.1_ASM119096v1_genomic.fna	CP011947.1	Haloferax gibbonsii strain ARA6	411642	445114
Archaea	GCA_001190965.1_ASM119096v1_genomic.fna	CP011947.1	Haloferax gibbonsii strain ARA6	521721	536298
Archaea	GCA_001190965.1_ASM119096v1_genomic.fna	CP011947.1	Haloferax gibbonsii strain ARA6	612905	631014
Archaea	GCA_001190965.1_ASM119096v1_genomic.fna	CP011947.1	Haloferax gibbonsii strain ARA6	707621	719335
Archaea	GCA_001190965.1_ASM119096v1_genomic.fna	CP011947.1	Haloferax gibbonsii strain ARA6	795942	811862
Archaea	GCA_001190965.1_ASM119096v1_genomic.fna	CP011947.1	Haloferax gibbonsii strain ARA6	888469	900180
Archaea	GCA_001190965.1_ASM119096v1_genomic.fna	CP011947.1	Haloferax gibbonsii strain ARA6	976787	986988
Archaea	GCA_001190965.1_ASM119096v1_genomic.fna	CP011947.1	Haloferax gibbonsii strain ARA6	1063595	1080126
Archaea	GCA_001190965.1_ASM119096v1_genomic.fna	CP011947.1	Haloferax gibbonsii strain ARA6	1156733	1184528
Archaea	GCA_001190965.1_ASM119096v1_genomic.fna	CP011947.1	Haloferax gibbonsii strain ARA6	1261135	1271511
Archaea	GCA_001190965.1_ASM119096v1_genomic.fna	CP011947.1	Haloferax gibbonsii strain ARA6	1348118	1359486
Archaea	GCA_001190965.1_ASM119096v1_genomic.fna	CP011947.1	Haloferax gibbonsii strain ARA6	1436093	1456088
Archaea	GCA_001190965.1_ASM119096v1_genomic.fna	CP011947.1	Haloferax gibbonsii strain ARA6	1532695	1586134
Archaea	GCA_001190965.1_ASM119096v1_genomic.fna	CP011947.1	Haloferax gibbonsii strain ARA6	1662741	1679048
Archaea	GCA_001190965.1_ASM119096v1_genomic.fna	CP011947.1	Haloferax gibbonsii strain ARA6	1755655	1792392
Archaea	GCA_001190965.1_ASM119096v1_genomic.fna	CP011947.1	Haloferax gibbonsii strain ARA6	1868999	1883232
Archaea	GCA_001190965.1_ASM119096v1_genomic.fna	CP011947.1	Haloferax gibbonsii strain ARA6	1959839	2002389
Archaea	GCA_001190965.1_ASM119096v1_genomic.fna	CP011947.1	Haloferax gibbonsii strain ARA6	2078996	2119051
Archaea	GCA_001190965.1_ASM119096v1_genomic.fna	CP011947.1	Haloferax gibbonsii strain ARA6	2195658	2209818
Archaea	GCA_001190965.1_ASM119096v1_genomic.fna	CP011947.1	Haloferax gibbonsii strain ARA6	2286425	2330418
Archaea	GCA_001190965.1_ASM119096v1_genomic.fna	CP011947.1	Haloferax gibbonsii strain ARA6	2407025	2509646
Archaea	GCA_001190965.1_ASM119096v1_genomic.fna	CP011947.1	Haloferax gibbonsii strain ARA6	2586253	2596395
Archaea	GCA_001190965.1_ASM119096v1_genomic.fna	CP011947.1	Haloferax gibbonsii strain ARA6	2673002	2689598
Archaea	GCA_001190965.1_ASM119096v1_genomic.fna	CP011947.1	Haloferax gibbonsii strain ARA6	2766205	2780829
Archaea	GCA_001190965.1_ASM119096v1_genomic.fna	CP011947.1	Haloferax gibbonsii strain ARA6	2857436	2868780
Archaea	GCA_001304615.2_ASM130461v2_genomic.fna	CP032683.1	Methanosarcina flavescens strain E03.2 chromosome	1	10096
Archaea	GCA_001304615.2_ASM130461v2_genomic.fna	CP032683.1	Methanosarcina flavescens strain E03.2 chromosome	95784	114861
Archaea	GCA_001304615.2_ASM130461v2_genomic.fna	CP032683.1	Methanosarcina flavescens strain E03.2 chromosome	200549	216280
Archaea	GCA_001304615.2_ASM130461v2_genomic.fna	CP032683.1	Methanosarcina flavescens strain E03.2 chromosome	301968	312716
Archaea	GCA_001304615.2_ASM130461v2_genomic.fna	CP032683.1	Methanosarcina flavescens strain E03.2 chromosome	398404	419312
Archaea	GCA_001304615.2_ASM130461v2_genomic.fna	CP032683.1	Methanosarcina flavescens strain E03.2 chromosome	505000	550072
Archaea	GCA_001304615.2_ASM130461v2_genomic.fna	CP032683.1	Methanosarcina flavescens strain E03.2 chromosome	635760	649433
Archaea	GCA_001304615.2_ASM130461v2_genomic.fna	CP032683.1	Methanosarcina flavescens strain E03.2 chromosome	735121	757222
Archaea	GCA_001304615.2_ASM130461v2_genomic.fna	CP032683.1	Methanosarcina flavescens strain E03.2 chromosome	842910	895882
Archaea	GCA_001304615.2_ASM130461v2_genomic.fna	CP032683.1	Methanosarcina flavescens strain E03.2 chromosome	981570	997497
Archaea	GCA_001304615.2_ASM130461v2_genomic.fna	CP032683.1	Methanosarcina flavescens strain E03.2 chromosome	1083185	1114496
Archaea	GCA_001304615.2_ASM130461v2_genomic.fna	CP032683.1	Methanosarcina flavescens strain E03.2 chromosome	1200184	1253175
Archaea	GCA_001304615.2_ASM130461v2_genomic.fna	CP032683.1	Methanosarcina flavescens strain E03.2 chromosome	1338863	1351343
Archaea	GCA_001304615.2_ASM130461v2_genomic.fna	CP032683.1	Methanosarcina flavescens strain E03.2 chromosome	1437031	1471379
Archaea	GCA_001304615.2_ASM130461v2_genomic.fna	CP032683.1	Methanosarcina flavescens strain E03.2 chromosome	1557067	1580686
Archaea	GCA_001304615.2_ASM130461v2_genomic.fna	CP032683.1	Methanosarcina flavescens strain E03.2 chromosome	1666374	1677304
Archaea	GCA_001304615.2_ASM130461v2_genomic.fna	CP032683.1	Methanosarcina flavescens strain E03.2 chromosome	1762992	1806389
Archaea	GCA_001304615.2_ASM130461v2_genomic.fna	CP032683.1	Methanosarcina flavescens strain E03.2 chromosome	1892077	1922659
Archaea	GCA_001304615.2_ASM130461v2_genomic.fna	CP032683.1	Methanosarcina flavescens strain E03.2 chromosome	2008347	2119378
Archaea	GCA_001304615.2_ASM130461v2_genomic.fna	CP032683.1	Methanosarcina flavescens strain E03.2 chromosome	2205066	2226969
Archaea	GCA_001304615.2_ASM130461v2_genomic.fna	CP032683.1	Methanosarcina flavescens strain E03.2 chromosome	2312657	2323591
Archaea	GCA_001304615.2_ASM130461v2_genomic.fna	CP032683.1	Methanosarcina flavescens strain E03.2 chromosome	2409279	2420105
Archaea	GCA_001304615.2_ASM130461v2_genomic.fna	CP032683.1	Methanosarcina flavescens strain E03.2 chromosome	2505793	2519166
Archaea	GCA_001304615.2_ASM130461v2_genomic.fna	CP032683.1	Methanosarcina flavescens strain E03.2 chromosome	2604854	2616008
Archaea	GCA_001304615.2_ASM130461v2_genomic.fna	CP032683.1	Methanosarcina flavescens strain E03.2 chromosome	2701696	2720182
Archaea	GCA_001304615.2_ASM130461v2_genomic.fna	CP032683.1	Methanosarcina flavescens strain E03.2 chromosome	2805870	2818349
Archaea	GCA_001304615.2_ASM130461v2_genomic.fna	CP032683.1	Methanosarcina flavescens strain E03.2 chromosome	2904037	2914542
Archaea	GCA_001304615.2_ASM130461v2_genomic.fna	CP032683.1	Methanosarcina flavescens strain E03.2 chromosome	3000230	3094847
Archaea	GCA_001304615.2_ASM130461v2_genomic.fna	CP032683.1	Methanosarcina flavescens strain E03.2 chromosome	3180535	3197997
Archaea	GCA_001368915.1_PRJEB5949_assembly_1_genomic.fna	CSTE01000002.1	Haloferax sp. Arc-Hr genome assembly PRJEB5949_assembly_1	1	16445
Archaea	GCA_001368915.1_PRJEB5949_assembly_1_genomic.fna	CSTE01000002.1	Haloferax sp. Arc-Hr genome assembly PRJEB5949_assembly_1	61329	72006
Archaea	GCA_001368915.1_PRJEB5949_assembly_1_genomic.fna	CSTE01000002.1	Haloferax sp. Arc-Hr genome assembly PRJEB5949_assembly_1	116890	179319
Archaea	GCA_001368915.1_PRJEB5949_assembly_1_genomic.fna	CSTE01000002.1	Haloferax sp. Arc-Hr genome assembly PRJEB5949_assembly_1	224203	240066
Archaea	GCA_001368915.1_PRJEB5949_assembly_1_genomic.fna	CSTE01000002.1	Haloferax sp. Arc-Hr genome assembly PRJEB5949_assembly_1	284950	296913
Archaea	GCA_001368915.1_PRJEB5949_assembly_1_genomic.fna	CSTE01000002.1	Haloferax sp. Arc-Hr genome assembly PRJEB5949_assembly_1	341797	361287
Archaea	GCA_001368915.1_PRJEB5949_assembly_1_genomic.fna	CSTE01000002.1	Haloferax sp. Arc-Hr genome assembly PRJEB5949_assembly_1	406171	432284
Archaea	GCA_001368915.1_PRJEB5949_assembly_1_genomic.fna	CSTE01000002.1	Haloferax sp. Arc-Hr genome assembly PRJEB5949_assembly_1	477168	488144
Archaea	GCA_001368915.1_PRJEB5949_assembly_1_genomic.fna	CSTE01000002.1	Haloferax sp. Arc-Hr genome assembly PRJEB5949_assembly_1	533028	546069
Archaea	GCA_001368915.1_PRJEB5949_assembly_1_genomic.fna	CSTE01000002.1	Haloferax sp. Arc-Hr genome assembly PRJEB5949_assembly_1	590953	601184
Archaea	GCA_001368915.1_PRJEB5949_assembly_1_genomic.fna	CSTE01000002.1	Haloferax sp. Arc-Hr genome assembly PRJEB5949_assembly_1	646068	658310
Archaea	GCA_001368915.1_PRJEB5949_assembly_1_genomic.fna	CSTE01000002.1	Haloferax sp. Arc-Hr genome assembly PRJEB5949_assembly_1	703194	734608
Archaea	GCA_001368915.1_PRJEB5949_assembly_1_genomic.fna	CSTE01000002.1	Haloferax sp. Arc-Hr genome assembly PRJEB5949_assembly_1	779492	791734
Archaea	GCA_001368915.1_PRJEB5949_assembly_1_genomic.fna	CSTE01000002.1	Haloferax sp. Arc-Hr genome assembly PRJEB5949_assembly_1	836618	847652
Archaea	GCA_001368915.1_PRJEB5949_assembly_1_genomic.fna	CSTE01000002.1	Haloferax sp. Arc-Hr genome assembly PRJEB5949_assembly_1	892536	916875
Archaea	GCA_001368915.1_PRJEB5949_assembly_1_genomic.fna	CSTE01000002.1	Haloferax sp. Arc-Hr genome assembly PRJEB5949_assembly_1	961759	986251
Archaea	GCA_001368915.1_PRJEB5949_assembly_1_genomic.fna	CSTE01000002.1	Haloferax sp. Arc-Hr genome assembly PRJEB5949_assembly_1	1031135	1044846
Archaea	GCA_001368915.1_PRJEB5949_assembly_1_genomic.fna	CSTE01000002.1	Haloferax sp. Arc-Hr genome assembly PRJEB5949_assembly_1	1089730	1102374
Archaea	GCA_001368915.1_PRJEB5949_assembly_1_genomic.fna	CSTE01000002.1	Haloferax sp. Arc-Hr genome assembly PRJEB5949_assembly_1	1147258	1158485
Archaea	GCA_001368915.1_PRJEB5949_assembly_1_genomic.fna	CSTE01000002.1	Haloferax sp. Arc-Hr genome assembly PRJEB5949_assembly_1	1203369	1217611
Archaea	GCA_001368915.1_PRJEB5949_assembly_1_genomic.fna	CSTE01000002.1	Haloferax sp. Arc-Hr genome assembly PRJEB5949_assembly_1	1262495	1281944
Archaea	GCA_001368915.1_PRJEB5949_assembly_1_genomic.fna	CSTE01000002.1	Haloferax sp. Arc-Hr genome assembly PRJEB5949_assembly_1	1326828	1343002
Archaea	GCA_001368915.1_PRJEB5949_assembly_1_genomic.fna	CSTE01000002.1	Haloferax sp. Arc-Hr genome assembly PRJEB5949_assembly_1	1387886	1400174
Archaea	GCA_001368915.1_PRJEB5949_assembly_1_genomic.fna	CSTE01000002.1	Haloferax sp. Arc-Hr genome assembly PRJEB5949_assembly_1	1445058	1459891
Archaea	GCA_001368915.1_PRJEB5949_assembly_1_genomic.fna	CSTE01000002.1	Haloferax sp. Arc-Hr genome assembly PRJEB5949_assembly_1	1504775	1521056
Archaea	GCA_001368915.1_PRJEB5949_assembly_1_genomic.fna	CSTE01000002.1	Haloferax sp. Arc-Hr genome assembly PRJEB5949_assembly_1	1565940	1578139
Archaea	GCA_001368915.1_PRJEB5949_assembly_1_genomic.fna	CSTE01000002.1	Haloferax sp. Arc-Hr genome assembly PRJEB5949_assembly_1	1623023	1638549
Archaea	GCA_001368915.1_PRJEB5949_assembly_1_genomic.fna	CSTE01000002.1	Haloferax sp. Arc-Hr genome assembly PRJEB5949_assembly_1	1683433	1744634
Archaea	GCA_001368915.1_PRJEB5949_assembly_1_genomic.fna	CSTE01000002.1	Haloferax sp. Arc-Hr genome assembly PRJEB5949_assembly_1	1789518	1812723
Archaea	GCA_002215565.1_ASM221556v1_genomic.fna	CP020364.1	Sulfolobus acidocaldarius strain DG1 chromosome	1	16636
Archaea	GCA_002215565.1_ASM221556v1_genomic.fna	CP020364.1	Sulfolobus acidocaldarius strain DG1 chromosome	70023	97805
Archaea	GCA_002215565.1_ASM221556v1_genomic.fna	CP020364.1	Sulfolobus acidocaldarius strain DG1 chromosome	151192	161913
Archaea	GCA_002215565.1_ASM221556v1_genomic.fna	CP020364.1	Sulfolobus acidocaldarius strain DG1 chromosome	215300	230979
Archaea	GCA_002215565.1_ASM221556v1_genomic.fna	CP020364.1	Sulfolobus acidocaldarius strain DG1 chromosome	284366	296480
Archaea	GCA_002215565.1_ASM221556v1_genomic.fna	CP020364.1	Sulfolobus acidocaldarius strain DG1 chromosome	349867	425499
Archaea	GCA_002215565.1_ASM221556v1_genomic.fna	CP020364.1	Sulfolobus acidocaldarius strain DG1 chromosome	478886	514366
Archaea	GCA_002215565.1_ASM221556v1_genomic.fna	CP020364.1	Sulfolobus acidocaldarius strain DG1 chromosome	567753	578848
Archaea	GCA_002215565.1_ASM221556v1_genomic.fna	CP020364.1	Sulfolobus acidocaldarius strain DG1 chromosome	632235	675736
Archaea	GCA_002215565.1_ASM221556v1_genomic.fna	CP020364.1	Sulfolobus acidocaldarius strain DG1 chromosome	729123	741906
Archaea	GCA_002215565.1_ASM221556v1_genomic.fna	CP020364.1	Sulfolobus acidocaldarius strain DG1 chromosome	795293	839232
Archaea	GCA_002215565.1_ASM221556v1_genomic.fna	CP020364.1	Sulfolobus acidocaldarius strain DG1 chromosome	892619	905561
Archaea	GCA_002215565.1_ASM221556v1_genomic.fna	CP020364.1	Sulfolobus acidocaldarius strain DG1 chromosome	958948	981536
Archaea	GCA_002215565.1_ASM221556v1_genomic.fna	CP020364.1	Sulfolobus acidocaldarius strain DG1 chromosome	1034923	1048419
Archaea	GCA_002215565.1_ASM221556v1_genomic.fna	CP020364.1	Sulfolobus acidocaldarius strain DG1 chromosome	1101806	1118836
Archaea	GCA_002215565.1_ASM221556v1_genomic.fna	CP020364.1	Sulfolobus acidocaldarius strain DG1 chromosome	1172223	1182859
Archaea	GCA_002215565.1_ASM221556v1_genomic.fna	CP020364.1	Sulfolobus acidocaldarius strain DG1 chromosome	1236246	1283210
Archaea	GCA_002215565.1_ASM221556v1_genomic.fna	CP020364.1	Sulfolobus acidocaldarius strain DG1 chromosome	1336597	1373391
Archaea	GCA_002215565.1_ASM221556v1_genomic.fna	CP020364.1	Sulfolobus acidocaldarius strain DG1 chromosome	1426778	1437726
Archaea	GCA_002215565.1_ASM221556v1_genomic.fna	CP020364.1	Sulfolobus acidocaldarius strain DG1 chromosome	1491113	1503227
Archaea	GCA_002215565.1_ASM221556v1_genomic.fna	CP020364.1	Sulfolobus acidocaldarius strain DG1 chromosome	1556614	1582437
Archaea	GCA_002215565.1_ASM221556v1_genomic.fna	CP020364.1	Sulfolobus acidocaldarius strain DG1 chromosome	1635824	1673006
Archaea	GCA_002215565.1_ASM221556v1_genomic.fna	CP020364.1	Sulfolobus acidocaldarius strain DG1 chromosome	1726393	1737875
Archaea	GCA_002215565.1_ASM221556v1_genomic.fna	CP020364.1	Sulfolobus acidocaldarius strain DG1 chromosome	1791262	1810889
Archaea	GCA_002215565.1_ASM221556v1_genomic.fna	CP020364.1	Sulfolobus acidocaldarius strain DG1 chromosome	1864276	1876594
Archaea	GCA_002215565.1_ASM221556v1_genomic.fna	CP020364.1	Sulfolobus acidocaldarius strain DG1 chromosome	1929981	1945710
Archaea	GCA_002215565.1_ASM221556v1_genomic.fna	CP020364.1	Sulfolobus acidocaldarius strain DG1 chromosome	1999097	2042681
Archaea	GCA_002215565.1_ASM221556v1_genomic.fna	CP020364.1	Sulfolobus acidocaldarius strain DG1 chromosome	2096068	2107178
Archaea	GCA_002215565.1_ASM221556v1_genomic.fna	CP020364.1	Sulfolobus acidocaldarius strain DG1 chromosome	2160565	2172450
Archaea	GCA_002287195.1_ASM228719v1_genomic.fna	LMVN01000001.1	Methanosphaera cuniculi strain 1R-7 contig_1	1	32221
Archaea	GCA_002287195.1_ASM228719v1_genomic.fna	LMVN01000001.1	Methanosphaera cuniculi strain 1R-7 contig_1	35501	123607
Archaea	GCA_002287195.1_ASM228719v1_genomic.fna	LMVN01000001.1	Methanosphaera cuniculi strain 1R-7 contig_1	126887	162112
Archaea	GCA_002287195.1_ASM228719v1_genomic.fna	LMVN01000001.1	Methanosphaera cuniculi strain 1R-7 contig_1	165392	184295
Archaea	GCA_003610195.1_ASM361019v1_genomic.fna	RAPO01000001.1	Halopiger aswanensis strain DSM 13151 Ga0074794_101	1	13135
Archaea	GCA_003610195.1_ASM361019v1_genomic.fna	RAPO01000001.1	Halopiger aswanensis strain DSM 13151 Ga0074794_101	40090	50197
Archaea	GCA_003610195.1_ASM361019v1_genomic.fna	RAPO01000001.1	Halopiger aswanensis strain DSM 13151 Ga0074794_101	77152	113858
Archaea	GCA_003610195.1_ASM361019v1_genomic.fna	RAPO01000001.1	Halopiger aswanensis strain DSM 13151 Ga0074794_101	140813	157625
Archaea	GCA_003610195.1_ASM361019v1_genomic.fna	RAPO01000001.1	Halopiger aswanensis strain DSM 13151 Ga0074794_101	184580	200586
Archaea	GCA_003610195.1_ASM361019v1_genomic.fna	RAPO01000001.1	Halopiger aswanensis strain DSM 13151 Ga0074794_101	227541	451506
Archaea	GCA_003610195.1_ASM361019v1_genomic.fna	RAPO01000001.1	Halopiger aswanensis strain DSM 13151 Ga0074794_101	478461	489650
Archaea	GCA_003610195.1_ASM361019v1_genomic.fna	RAPO01000001.1	Halopiger aswanensis strain DSM 13151 Ga0074794_101	516605	529567
Archaea	GCA_003610195.1_ASM361019v1_genomic.fna	RAPO01000001.1	Halopiger aswanensis strain DSM 13151 Ga0074794_101	556522	568619
Archaea	GCA_003610195.1_ASM361019v1_genomic.fna	RAPO01000001.1	Halopiger aswanensis strain DSM 13151 Ga0074794_101	595574	611374
Archaea	GCA_003610195.1_ASM361019v1_genomic.fna	RAPO01000001.1	Halopiger aswanensis strain DSM 13151 Ga0074794_101	638329	666487
Archaea	GCA_003610195.1_ASM361019v1_genomic.fna	RAPO01000001.1	Halopiger aswanensis strain DSM 13151 Ga0074794_101	693442	718260
Archaea	GCA_003610195.1_ASM361019v1_genomic.fna	RAPO01000001.1	Halopiger aswanensis strain DSM 13151 Ga0074794_101	745215	757050
Archaea	GCA_003610195.1_ASM361019v1_genomic.fna	RAPO01000001.1	Halopiger aswanensis strain DSM 13151 Ga0074794_101	784005	795699
Archaea	GCA_003610195.1_ASM361019v1_genomic.fna	RAPO01000001.1	Halopiger aswanensis strain DSM 13151 Ga0074794_101	822654	837091
Archaea	GCA_003610195.1_ASM361019v1_genomic.fna	RAPO01000001.1	Halopiger aswanensis strain DSM 13151 Ga0074794_101	864046	874827
Archaea	GCA_003610195.1_ASM361019v1_genomic.fna	RAPO01000001.1	Halopiger aswanensis strain DSM 13151 Ga0074794_101	901782	917374
Archaea	GCA_003610195.1_ASM361019v1_genomic.fna	RAPO01000001.1	Halopiger aswanensis strain DSM 13151 Ga0074794_101	944329	956738
Archaea	GCA_003610195.1_ASM361019v1_genomic.fna	RAPO01000001.1	Halopiger aswanensis strain DSM 13151 Ga0074794_101	983693	1009905
Archaea	GCA_003610195.1_ASM361019v1_genomic.fna	RAPO01000001.1	Halopiger aswanensis strain DSM 13151 Ga0074794_101	1036860	1047405
Archaea	GCA_003610195.1_ASM361019v1_genomic.fna	RAPO01000001.1	Halopiger aswanensis strain DSM 13151 Ga0074794_101	1074360	1084705
Archaea	GCA_003610195.1_ASM361019v1_genomic.fna	RAPO01000001.1	Halopiger aswanensis strain DSM 13151 Ga0074794_101	1111660	1155145
Archaea	GCA_003610195.1_ASM361019v1_genomic.fna	RAPO01000001.1	Halopiger aswanensis strain DSM 13151 Ga0074794_101	1182100	1194388
Archaea	GCA_003610195.1_ASM361019v1_genomic.fna	RAPO01000001.1	Halopiger aswanensis strain DSM 13151 Ga0074794_101	1221343	1233706
Archaea	GCA_003610195.1_ASM361019v1_genomic.fna	RAPO01000001.1	Halopiger aswanensis strain DSM 13151 Ga0074794_101	1260661	1277007
Archaea	GCA_003610195.1_ASM361019v1_genomic.fna	RAPO01000001.1	Halopiger aswanensis strain DSM 13151 Ga0074794_101	1303962	1317060
Archaea	GCA_003610195.1_ASM361019v1_genomic.fna	RAPO01000001.1	Halopiger aswanensis strain DSM 13151 Ga0074794_101	1344015	1354481
Archaea	GCA_003610195.1_ASM361019v1_genomic.fna	RAPO01000001.1	Halopiger aswanensis strain DSM 13151 Ga0074794_101	1381436	1393407
Archaea	GCA_003610195.1_ASM361019v1_genomic.fna	RAPO01000001.1	Halopiger aswanensis strain DSM 13151 Ga0074794_101	1420362	1438311
Archaea	GCA_003841485.1_ASM384148v1_genomic.fna	REFY01000001.1	Natrarchaeobius halalkaliphilus strain AArcht-Sl Ga0101036_101	1	94004
Archaea	GCA_003841485.1_ASM384148v1_genomic.fna	REFY01000001.1	Natrarchaeobius halalkaliphilus strain AArcht-Sl Ga0101036_101	94049	107124
Archaea	GCA_003841485.1_ASM384148v1_genomic.fna	REFY01000001.1	Natrarchaeobius halalkaliphilus strain AArcht-Sl Ga0101036_101	107169	141957
Archaea	GCA_003841485.1_ASM384148v1_genomic.fna	REFY01000001.1	Natrarchaeobius halalkaliphilus strain AArcht-Sl Ga0101036_101	142002	153874
Archaea	GCA_003841485.1_ASM384148v1_genomic.fna	REFY01000001.1	Natrarchaeobius halalkaliphilus strain AArcht-Sl Ga0101036_101	153919	245305
Archaea	GCA_003841485.1_ASM384148v1_genomic.fna	REFY01000001.1	Natrarchaeobius halalkaliphilus strain AArcht-Sl Ga0101036_101	245350	256398
Archaea	GCA_003841485.1_ASM384148v1_genomic.fna	REFY01000001.1	Natrarchaeobius halalkaliphilus strain AArcht-Sl Ga0101036_101	256443	272600
Archaea	GCA_003841485.1_ASM384148v1_genomic.fna	REFY01000001.1	Natrarchaeobius halalkaliphilus strain AArcht-Sl Ga0101036_101	272645	293541
Archaea	GCA_003841485.1_ASM384148v1_genomic.fna	REFY01000001.1	Natrarchaeobius halalkaliphilus strain AArcht-Sl Ga0101036_101	293586	327253
Archaea	GCA_003841485.1_ASM384148v1_genomic.fna	REFY01000001.1	Natrarchaeobius halalkaliphilus strain AArcht-Sl Ga0101036_101	327298	377075
Archaea	GCA_003841485.1_ASM384148v1_genomic.fna	REFY01000001.1	Natrarchaeobius halalkaliphilus strain AArcht-Sl Ga0101036_101	377120	388281
Archaea	GCA_003841485.1_ASM384148v1_genomic.fna	REFY01000001.1	Natrarchaeobius halalkaliphilus strain AArcht-Sl Ga0101036_101	388326	400490
Archaea	GCA_003841485.1_ASM384148v1_genomic.fna	REFY01000001.1	Natrarchaeobius halalkaliphilus strain AArcht-Sl Ga0101036_101	400535	410939
Archaea	GCA_003841485.1_ASM384148v1_genomic.fna	REFY01000001.1	Natrarchaeobius halalkaliphilus strain AArcht-Sl Ga0101036_101	410984	423895
Archaea	GCA_003841485.1_ASM384148v1_genomic.fna	REFY01000001.1	Natrarchaeobius halalkaliphilus strain AArcht-Sl Ga0101036_101	423940	491827
Archaea	GCA_003841485.1_ASM384148v1_genomic.fna	REFY01000001.1	Natrarchaeobius halalkaliphilus strain AArcht-Sl Ga0101036_101	491872	504733
Archaea	GCA_003841485.1_ASM384148v1_genomic.fna	REFY01000001.1	Natrarchaeobius halalkaliphilus strain AArcht-Sl Ga0101036_101	504778	515892
Archaea	GCA_003841485.1_ASM384148v1_genomic.fna	REFY01000001.1	Natrarchaeobius halalkaliphilus strain AArcht-Sl Ga0101036_101	515937	550345
Archaea	GCA_003841485.1_ASM384148v1_genomic.fna	REFY01000001.1	Natrarchaeobius halalkaliphilus strain AArcht-Sl Ga0101036_101	550390	563248
Archaea	GCA_003841485.1_ASM384148v1_genomic.fna	REFY01000001.1	Natrarchaeobius halalkaliphilus strain AArcht-Sl Ga0101036_101	563293	575883
Archaea	GCA_003841485.1_ASM384148v1_genomic.fna	REFY01000001.1	Natrarchaeobius halalkaliphilus strain AArcht-Sl Ga0101036_101	575928	587572
Archaea	GCA_003841485.1_ASM384148v1_genomic.fna	REFY01000001.1	Natrarchaeobius halalkaliphilus strain AArcht-Sl Ga0101036_101	587617	600332
Archaea	GCA_003841485.1_ASM384148v1_genomic.fna	REFY01000001.1	Natrarchaeobius halalkaliphilus strain AArcht-Sl Ga0101036_101	600377	617119
Archaea	GCA_003841485.1_ASM384148v1_genomic.fna	REFY01000001.1	Natrarchaeobius halalkaliphilus strain AArcht-Sl Ga0101036_101	617164	658638
Archaea	GCA_003841485.1_ASM384148v1_genomic.fna	REFY01000001.1	Natrarchaeobius halalkaliphilus strain AArcht-Sl Ga0101036_101	658683	675665
Archaea	GCA_003841485.1_ASM384148v1_genomic.fna	REFY01000001.1	Natrarchaeobius halalkaliphilus strain AArcht-Sl Ga0101036_101	675710	689125
Archaea	GCA_003841485.1_ASM384148v1_genomic.fna	REFY01000001.1	Natrarchaeobius halalkaliphilus strain AArcht-Sl Ga0101036_101	689170	719079
Archaea	GCA_008326385.1_SulIC007_1.0_genomic.fna	AP018930.1	Sulfuracidifex tepidarius IC-007 DNA	1	12271
Archaea	GCA_008326385.1_SulIC007_1.0_genomic.fna	AP018930.1	Sulfuracidifex tepidarius IC-007 DNA	82132	122118
Archaea	GCA_008326385.1_SulIC007_1.0_genomic.fna	AP018930.1	Sulfuracidifex tepidarius IC-007 DNA	191979	202351
Archaea	GCA_008326385.1_SulIC007_1.0_genomic.fna	AP018930.1	Sulfuracidifex tepidarius IC-007 DNA	272212	364404
Archaea	GCA_008326385.1_SulIC007_1.0_genomic.fna	AP018930.1	Sulfuracidifex tepidarius IC-007 DNA	434265	444332
Archaea	GCA_008326385.1_SulIC007_1.0_genomic.fna	AP018930.1	Sulfuracidifex tepidarius IC-007 DNA	514193	526006
Archaea	GCA_008326385.1_SulIC007_1.0_genomic.fna	AP018930.1	Sulfuracidifex tepidarius IC-007 DNA	595867	607159
Archaea	GCA_008326385.1_SulIC007_1.0_genomic.fna	AP018930.1	Sulfuracidifex tepidarius IC-007 DNA	677020	688130
Archaea	GCA_008326385.1_SulIC007_1.0_genomic.fna	AP018930.1	Sulfuracidifex tepidarius IC-007 DNA	757991	771437
Archaea	GCA_008326385.1_SulIC007_1.0_genomic.fna	AP018930.1	Sulfuracidifex tepidarius IC-007 DNA	841298	860932
Archaea	GCA_008326385.1_SulIC007_1.0_genomic.fna	AP018930.1	Sulfuracidifex tepidarius IC-007 DNA	930793	943389
Archaea	GCA_008326385.1_SulIC007_1.0_genomic.fna	AP018930.1	Sulfuracidifex tepidarius IC-007 DNA	1013250	1027497
Archaea	GCA_008326385.1_SulIC007_1.0_genomic.fna	AP018930.1	Sulfuracidifex tepidarius IC-007 DNA	1097358	1110370
Archaea	GCA_008326385.1_SulIC007_1.0_genomic.fna	AP018930.1	Sulfuracidifex tepidarius IC-007 DNA	1180231	1208026
Archaea	GCA_008326385.1_SulIC007_1.0_genomic.fna	AP018930.1	Sulfuracidifex tepidarius IC-007 DNA	1277887	1290978
Archaea	GCA_008326385.1_SulIC007_1.0_genomic.fna	AP018930.1	Sulfuracidifex tepidarius IC-007 DNA	1360839	1372441
Archaea	GCA_008326385.1_SulIC007_1.0_genomic.fna	AP018930.1	Sulfuracidifex tepidarius IC-007 DNA	1442302	1462828
Archaea	GCA_008326385.1_SulIC007_1.0_genomic.fna	AP018930.1	Sulfuracidifex tepidarius IC-007 DNA	1532689	1546859
Archaea	GCA_008326385.1_SulIC007_1.0_genomic.fna	AP018930.1	Sulfuracidifex tepidarius IC-007 DNA	1616720	1626732
Archaea	GCA_008326385.1_SulIC007_1.0_genomic.fna	AP018930.1	Sulfuracidifex tepidarius IC-007 DNA	1696593	1706724
Archaea	GCA_008326385.1_SulIC007_1.0_genomic.fna	AP018930.1	Sulfuracidifex tepidarius IC-007 DNA	1776585	1796003
Archaea	GCA_008326385.1_SulIC007_1.0_genomic.fna	AP018930.1	Sulfuracidifex tepidarius IC-007 DNA	1865864	1876295
Archaea	GCA_008326385.1_SulIC007_1.0_genomic.fna	AP018930.1	Sulfuracidifex tepidarius IC-007 DNA	1946156	1956930
Archaea	GCA_008326385.1_SulIC007_1.0_genomic.fna	AP018930.1	Sulfuracidifex tepidarius IC-007 DNA	2026791	2041508
Archaea	GCA_008326385.1_SulIC007_1.0_genomic.fna	AP018930.1	Sulfuracidifex tepidarius IC-007 DNA	2111369	2131957
Archaea	GCA_008326385.1_SulIC007_1.0_genomic.fna	AP018930.1	Sulfuracidifex tepidarius IC-007 DNA	2201818	2213107
Archaea	GCA_008326385.1_SulIC007_1.0_genomic.fna	AP018930.1	Sulfuracidifex tepidarius IC-007 DNA	2282968	2294693
Archaea	GCA_008326385.1_SulIC007_1.0_genomic.fna	AP018930.1	Sulfuracidifex tepidarius IC-007 DNA	2364554	2383648
Archaea	GCA_008326385.1_SulIC007_1.0_genomic.fna	AP018930.1	Sulfuracidifex tepidarius IC-007 DNA	2453509	2465408
Archaea	GCA_010692905.1_ASM1069290v1_genomic.fna	CP048738.1	Haloferax alexandrinus strain wsp1 chromosome	1	14317
Archaea	GCA_010692905.1_ASM1069290v1_genomic.fna	CP048738.1	Haloferax alexandrinus strain wsp1 chromosome	121934	181649
Archaea	GCA_010692905.1_ASM1069290v1_genomic.fna	CP048738.1	Haloferax alexandrinus strain wsp1 chromosome	289266	302124
Archaea	GCA_010692905.1_ASM1069290v1_genomic.fna	CP048738.1	Haloferax alexandrinus strain wsp1 chromosome	409741	421149
Archaea	GCA_010692905.1_ASM1069290v1_genomic.fna	CP048738.1	Haloferax alexandrinus strain wsp1 chromosome	528766	542021
Archaea	GCA_010692905.1_ASM1069290v1_genomic.fna	CP048738.1	Haloferax alexandrinus strain wsp1 chromosome	649638	660985
Archaea	GCA_010692905.1_ASM1069290v1_genomic.fna	CP048738.1	Haloferax alexandrinus strain wsp1 chromosome	768602	780525
Archaea	GCA_010692905.1_ASM1069290v1_genomic.fna	CP048738.1	Haloferax alexandrinus strain wsp1 chromosome	888142	902770
Archaea	GCA_010692905.1_ASM1069290v1_genomic.fna	CP048738.1	Haloferax alexandrinus strain wsp1 chromosome	1010387	1022218
Archaea	GCA_010692905.1_ASM1069290v1_genomic.fna	CP048738.1	Haloferax alexandrinus strain wsp1 chromosome	1129835	1140382
Archaea	GCA_010692905.1_ASM1069290v1_genomic.fna	CP048738.1	Haloferax alexandrinus strain wsp1 chromosome	1247999	1259329
Archaea	GCA_010692905.1_ASM1069290v1_genomic.fna	CP048738.1	Haloferax alexandrinus strain wsp1 chromosome	1366946	1378405
Archaea	GCA_010692905.1_ASM1069290v1_genomic.fna	CP048738.1	Haloferax alexandrinus strain wsp1 chromosome	1486022	1541722
Archaea	GCA_010692905.1_ASM1069290v1_genomic.fna	CP048738.1	Haloferax alexandrinus strain wsp1 chromosome	1649339	1661835
Archaea	GCA_010692905.1_ASM1069290v1_genomic.fna	CP048738.1	Haloferax alexandrinus strain wsp1 chromosome	1769452	1782680
Archaea	GCA_010692905.1_ASM1069290v1_genomic.fna	CP048738.1	Haloferax alexandrinus strain wsp1 chromosome	1890297	1906088
Archaea	GCA_010692905.1_ASM1069290v1_genomic.fna	CP048738.1	Haloferax alexandrinus strain wsp1 chromosome	2013705	2079551
Archaea	GCA_010692905.1_ASM1069290v1_genomic.fna	CP048738.1	Haloferax alexandrinus strain wsp1 chromosome	2187168	2214636
Archaea	GCA_010692905.1_ASM1069290v1_genomic.fna	CP048738.1	Haloferax alexandrinus strain wsp1 chromosome	2322253	2333559
Archaea	GCA_010692905.1_ASM1069290v1_genomic.fna	CP048738.1	Haloferax alexandrinus strain wsp1 chromosome	2441176	2457328
Archaea	GCA_010692905.1_ASM1069290v1_genomic.fna	CP048738.1	Haloferax alexandrinus strain wsp1 chromosome	2564945	2589711
Archaea	GCA_010692905.1_ASM1069290v1_genomic.fna	CP048738.1	Haloferax alexandrinus strain wsp1 chromosome	2697328	2712671
Archaea	GCA_010692905.1_ASM1069290v1_genomic.fna	CP048738.1	Haloferax alexandrinus strain wsp1 chromosome	2820288	2831175
Archaea	GCA_010692905.1_ASM1069290v1_genomic.fna	CP048738.1	Haloferax alexandrinus strain wsp1 chromosome	2938792	2951555
Archaea	GCA_010692905.1_ASM1069290v1_genomic.fna	CP048738.1	Haloferax alexandrinus strain wsp1 chromosome	3059172	3087330
Archaea	GCA_010692905.1_ASM1069290v1_genomic.fna	CP048738.1	Haloferax alexandrinus strain wsp1 chromosome	3194947	3211276
Archaea	GCA_010692905.1_ASM1069290v1_genomic.fna	CP048738.1	Haloferax alexandrinus strain wsp1 chromosome	3318893	3330646
Archaea	GCA_010692905.1_ASM1069290v1_genomic.fna	CP048738.1	Haloferax alexandrinus strain wsp1 chromosome	3438263	3480460
Archaea	GCA_010692905.1_ASM1069290v1_genomic.fna	CP048738.1	Haloferax alexandrinus strain wsp1 chromosome	3588077	3599379
Archaea	GCA_900090055.1_C.divulgatum_PM4_genomic.fna	LT719092.1	Cuniculiplasma divulgatum strain PM4 (=JCM 30641;=VKM B-2940) genome assembly	1	14760
Archaea	GCA_900090055.1_C.divulgatum_PM4_genomic.fna	LT719092.1	Cuniculiplasma divulgatum strain PM4 (=JCM 30641;=VKM B-2940) genome assembly	60908	80309
Archaea	GCA_900090055.1_C.divulgatum_PM4_genomic.fna	LT719092.1	Cuniculiplasma divulgatum strain PM4 (=JCM 30641;=VKM B-2940) genome assembly	126457	136638
Archaea	GCA_900090055.1_C.divulgatum_PM4_genomic.fna	LT719092.1	Cuniculiplasma divulgatum strain PM4 (=JCM 30641;=VKM B-2940) genome assembly	182786	209861
Archaea	GCA_900090055.1_C.divulgatum_PM4_genomic.fna	LT719092.1	Cuniculiplasma divulgatum strain PM4 (=JCM 30641;=VKM B-2940) genome assembly	256009	267493
Archaea	GCA_900090055.1_C.divulgatum_PM4_genomic.fna	LT719092.1	Cuniculiplasma divulgatum strain PM4 (=JCM 30641;=VKM B-2940) genome assembly	313641	350347
Archaea	GCA_900090055.1_C.divulgatum_PM4_genomic.fna	LT719092.1	Cuniculiplasma divulgatum strain PM4 (=JCM 30641;=VKM B-2940) genome assembly	396495	410982
Archaea	GCA_900090055.1_C.divulgatum_PM4_genomic.fna	LT719092.1	Cuniculiplasma divulgatum strain PM4 (=JCM 30641;=VKM B-2940) genome assembly	457130	483998
Archaea	GCA_900090055.1_C.divulgatum_PM4_genomic.fna	LT719092.1	Cuniculiplasma divulgatum strain PM4 (=JCM 30641;=VKM B-2940) genome assembly	530146	543263
Archaea	GCA_900090055.1_C.divulgatum_PM4_genomic.fna	LT719092.1	Cuniculiplasma divulgatum strain PM4 (=JCM 30641;=VKM B-2940) genome assembly	589411	603644
Archaea	GCA_900090055.1_C.divulgatum_PM4_genomic.fna	LT719092.1	Cuniculiplasma divulgatum strain PM4 (=JCM 30641;=VKM B-2940) genome assembly	649792	706243
Archaea	GCA_900090055.1_C.divulgatum_PM4_genomic.fna	LT719092.1	Cuniculiplasma divulgatum strain PM4 (=JCM 30641;=VKM B-2940) genome assembly	752391	776662
Archaea	GCA_900090055.1_C.divulgatum_PM4_genomic.fna	LT719092.1	Cuniculiplasma divulgatum strain PM4 (=JCM 30641;=VKM B-2940) genome assembly	822810	839302
Archaea	GCA_900090055.1_C.divulgatum_PM4_genomic.fna	LT719092.1	Cuniculiplasma divulgatum strain PM4 (=JCM 30641;=VKM B-2940) genome assembly	885450	904634
Archaea	GCA_900090055.1_C.divulgatum_PM4_genomic.fna	LT719092.1	Cuniculiplasma divulgatum strain PM4 (=JCM 30641;=VKM B-2940) genome assembly	950782	963431
Archaea	GCA_900090055.1_C.divulgatum_PM4_genomic.fna	LT719092.1	Cuniculiplasma divulgatum strain PM4 (=JCM 30641;=VKM B-2940) genome assembly	1009579	1022753
Archaea	GCA_900090055.1_C.divulgatum_PM4_genomic.fna	LT719092.1	Cuniculiplasma divulgatum strain PM4 (=JCM 30641;=VKM B-2940) genome assembly	1068901	1087034
Archaea	GCA_900090055.1_C.divulgatum_PM4_genomic.fna	LT719092.1	Cuniculiplasma divulgatum strain PM4 (=JCM 30641;=VKM B-2940) genome assembly	1133182	1146716
Archaea	GCA_900090055.1_C.divulgatum_PM4_genomic.fna	LT719092.1	Cuniculiplasma divulgatum strain PM4 (=JCM 30641;=VKM B-2940) genome assembly	1192864	1202945
Archaea	GCA_900090055.1_C.divulgatum_PM4_genomic.fna	LT719092.1	Cuniculiplasma divulgatum strain PM4 (=JCM 30641;=VKM B-2940) genome assembly	1249093	1268187
Archaea	GCA_900090055.1_C.divulgatum_PM4_genomic.fna	LT719092.1	Cuniculiplasma divulgatum strain PM4 (=JCM 30641;=VKM B-2940) genome assembly	1314335	1326521
Archaea	GCA_900090055.1_C.divulgatum_PM4_genomic.fna	LT719092.1	Cuniculiplasma divulgatum strain PM4 (=JCM 30641;=VKM B-2940) genome assembly	1372669	1391486
Archaea	GCA_900090055.1_C.divulgatum_PM4_genomic.fna	LT719092.1	Cuniculiplasma divulgatum strain PM4 (=JCM 30641;=VKM B-2940) genome assembly	1437634	1451766
Archaea	GCA_900090055.1_C.divulgatum_PM4_genomic.fna	LT719092.1	Cuniculiplasma divulgatum strain PM4 (=JCM 30641;=VKM B-2940) genome assembly	1497914	1511404
Archaea	GCA_900090055.1_C.divulgatum_PM4_genomic.fna	LT719092.1	Cuniculiplasma divulgatum strain PM4 (=JCM 30641;=VKM B-2940) genome assembly	1557552	1570420
Archaea	GCA_900090055.1_C.divulgatum_PM4_genomic.fna	LT719092.1	Cuniculiplasma divulgatum strain PM4 (=JCM 30641;=VKM B-2940) genome assembly	1616568	1651119
Archaea	GCA_900090055.1_C.divulgatum_PM4_genomic.fna	LT719092.1	Cuniculiplasma divulgatum strain PM4 (=JCM 30641;=VKM B-2940) genome assembly	1697267	1710209
Archaea	GCA_900090055.1_C.divulgatum_PM4_genomic.fna	LT719092.1	Cuniculiplasma divulgatum strain PM4 (=JCM 30641;=VKM B-2940) genome assembly	1756357	1770616
Archaea	GCA_900090055.1_C.divulgatum_PM4_genomic.fna	LT719092.1	Cuniculiplasma divulgatum strain PM4 (=JCM 30641;=VKM B-2940) genome assembly	1816764	1832774
Archaea	GCA_900100875.1_IMG-taxon_2671180169_annotated_assembly_genomic.fna	FNKQ01000001.1	Halopelagius longus strain CGMCC 1.12397 genome assembly	1	39288
Archaea	GCA_900100875.1_IMG-taxon_2671180169_annotated_assembly_genomic.fna	FNKQ01000001.1	Halopelagius longus strain CGMCC 1.12397 genome assembly	57723	87070
Archaea	GCA_900100875.1_IMG-taxon_2671180169_annotated_assembly_genomic.fna	FNKQ01000001.1	Halopelagius longus strain CGMCC 1.12397 genome assembly	105505	132522
Archaea	GCA_900100875.1_IMG-taxon_2671180169_annotated_assembly_genomic.fna	FNKQ01000001.1	Halopelagius longus strain CGMCC 1.12397 genome assembly	150957	166445
Archaea	GCA_900100875.1_IMG-taxon_2671180169_annotated_assembly_genomic.fna	FNKQ01000001.1	Halopelagius longus strain CGMCC 1.12397 genome assembly	184880	206385
Archaea	GCA_900100875.1_IMG-taxon_2671180169_annotated_assembly_genomic.fna	FNKQ01000001.1	Halopelagius longus strain CGMCC 1.12397 genome assembly	224820	235589
Archaea	GCA_900100875.1_IMG-taxon_2671180169_annotated_assembly_genomic.fna	FNKQ01000001.1	Halopelagius longus strain CGMCC 1.12397 genome assembly	254024	275021
Archaea	GCA_900100875.1_IMG-taxon_2671180169_annotated_assembly_genomic.fna	FNKQ01000001.1	Halopelagius longus strain CGMCC 1.12397 genome assembly	293456	324869
Archaea	GCA_900100875.1_IMG-taxon_2671180169_annotated_assembly_genomic.fna	FNKQ01000001.1	Halopelagius longus strain CGMCC 1.12397 genome assembly	343304	353318
Archaea	GCA_900100875.1_IMG-taxon_2671180169_annotated_assembly_genomic.fna	FNKQ01000001.1	Halopelagius longus strain CGMCC 1.12397 genome assembly	371753	390271
Archaea	GCA_900100875.1_IMG-taxon_2671180169_annotated_assembly_genomic.fna	FNKQ01000001.1	Halopelagius longus strain CGMCC 1.12397 genome assembly	408706	423161
Archaea	GCA_900100875.1_IMG-taxon_2671180169_annotated_assembly_genomic.fna	FNKQ01000001.1	Halopelagius longus strain CGMCC 1.12397 genome assembly	441596	456483
Archaea	GCA_900100875.1_IMG-taxon_2671180169_annotated_assembly_genomic.fna	FNKQ01000001.1	Halopelagius longus strain CGMCC 1.12397 genome assembly	474918	506196
Archaea	GCA_900100875.1_IMG-taxon_2671180169_annotated_assembly_genomic.fna	FNKQ01000001.1	Halopelagius longus strain CGMCC 1.12397 genome assembly	524631	538212
Archaea	GCA_900100875.1_IMG-taxon_2671180169_annotated_assembly_genomic.fna	FNKQ01000001.1	Halopelagius longus strain CGMCC 1.12397 genome assembly	556647	568735
Archaea	GCA_900100875.1_IMG-taxon_2671180169_annotated_assembly_genomic.fna	FNKQ01000001.1	Halopelagius longus strain CGMCC 1.12397 genome assembly	587170	598600
Archaea	GCA_900100875.1_IMG-taxon_2671180169_annotated_assembly_genomic.fna	FNKQ01000001.1	Halopelagius longus strain CGMCC 1.12397 genome assembly	617035	629457
Archaea	GCA_900100875.1_IMG-taxon_2671180169_annotated_assembly_genomic.fna	FNKQ01000001.1	Halopelagius longus strain CGMCC 1.12397 genome assembly	647892	678011
Archaea	GCA_900100875.1_IMG-taxon_2671180169_annotated_assembly_genomic.fna	FNKQ01000001.1	Halopelagius longus strain CGMCC 1.12397 genome assembly	696446	713384
Archaea	GCA_900100875.1_IMG-taxon_2671180169_annotated_assembly_genomic.fna	FNKQ01000001.1	Halopelagius longus strain CGMCC 1.12397 genome assembly	731819	759531
Archaea	GCA_900100875.1_IMG-taxon_2671180169_annotated_assembly_genomic.fna	FNKQ01000001.1	Halopelagius longus strain CGMCC 1.12397 genome assembly	777966	788934
Archaea	GCA_900100875.1_IMG-taxon_2671180169_annotated_assembly_genomic.fna	FNKQ01000001.1	Halopelagius longus strain CGMCC 1.12397 genome assembly	807369	825126
Archaea	GCA_900100875.1_IMG-taxon_2671180169_annotated_assembly_genomic.fna	FNKQ01000001.1	Halopelagius longus strain CGMCC 1.12397 genome assembly	843561	873312
Archaea	GCA_900100875.1_IMG-taxon_2671180169_annotated_assembly_genomic.fna	FNKQ01000001.1	Halopelagius longus strain CGMCC 1.12397 genome assembly	891747	944565
Archaea	GCA_900100875.1_IMG-taxon_2671180169_annotated_assembly_genomic.fna	FNKQ01000001.1	Halopelagius longus strain CGMCC 1.12397 genome assembly	963000	976341
Archaea	GCA_900100875.1_IMG-taxon_2671180169_annotated_assembly_genomic.fna	FNKQ01000001.1	Halopelagius longus strain CGMCC 1.12397 genome assembly	994776	1005787
Archaea	GCA_900100875.1_IMG-taxon_2671180169_annotated_assembly_genomic.fna	FNKQ01000001.1	Halopelagius longus strain CGMCC 1.12397 genome assembly	1024222	1046795
Archaea	GCA_900100875.1_IMG-taxon_2671180169_annotated_assembly_genomic.fna	FNKQ01000001.1	Halopelagius longus strain CGMCC 1.12397 genome assembly	1065230	1083376
Archaea	GCA_900100875.1_IMG-taxon_2671180169_annotated_assembly_genomic.fna	FNKQ01000001.1	Halopelagius longus strain CGMCC 1.12397 genome assembly	1101811	1112029
Archaea	GCA_900106715.1_IMG-taxon_2693429892_annotated_assembly_genomic.fna	FNOF01000001.1	Haloarcula vallismortis strain DSM 3756 genome assembly	1	12621
Archaea	GCA_900106715.1_IMG-taxon_2693429892_annotated_assembly_genomic.fna	FNOF01000001.1	Haloarcula vallismortis strain DSM 3756 genome assembly	12867	31745
Archaea	GCA_900106715.1_IMG-taxon_2693429892_annotated_assembly_genomic.fna	FNOF01000001.1	Haloarcula vallismortis strain DSM 3756 genome assembly	31991	44103
Archaea	GCA_900106715.1_IMG-taxon_2693429892_annotated_assembly_genomic.fna	FNOF01000001.1	Haloarcula vallismortis strain DSM 3756 genome assembly	44349	54694
Archaea	GCA_900106715.1_IMG-taxon_2693429892_annotated_assembly_genomic.fna	FNOF01000001.1	Haloarcula vallismortis strain DSM 3756 genome assembly	54940	66540
Archaea	GCA_900106715.1_IMG-taxon_2693429892_annotated_assembly_genomic.fna	FNOF01000001.1	Haloarcula vallismortis strain DSM 3756 genome assembly	66786	80130
Archaea	GCA_900106715.1_IMG-taxon_2693429892_annotated_assembly_genomic.fna	FNOF01000001.1	Haloarcula vallismortis strain DSM 3756 genome assembly	80376	148263
Archaea	GCA_900106715.1_IMG-taxon_2693429892_annotated_assembly_genomic.fna	FNOF01000001.1	Haloarcula vallismortis strain DSM 3756 genome assembly	148509	181059
Archaea	GCA_900106715.1_IMG-taxon_2693429892_annotated_assembly_genomic.fna	FNOF01000001.1	Haloarcula vallismortis strain DSM 3756 genome assembly	181305	220268
Archaea	GCA_900106715.1_IMG-taxon_2693429892_annotated_assembly_genomic.fna	FNOF01000001.1	Haloarcula vallismortis strain DSM 3756 genome assembly	220514	234721
Archaea	GCA_900106715.1_IMG-taxon_2693429892_annotated_assembly_genomic.fna	FNOF01000001.1	Haloarcula vallismortis strain DSM 3756 genome assembly	234967	245595
Archaea	GCA_900106715.1_IMG-taxon_2693429892_annotated_assembly_genomic.fna	FNOF01000001.1	Haloarcula vallismortis strain DSM 3756 genome assembly	245841	255895
Archaea	GCA_900106715.1_IMG-taxon_2693429892_annotated_assembly_genomic.fna	FNOF01000001.1	Haloarcula vallismortis strain DSM 3756 genome assembly	256141	307156
Archaea	GCA_900106715.1_IMG-taxon_2693429892_annotated_assembly_genomic.fna	FNOF01000001.1	Haloarcula vallismortis strain DSM 3756 genome assembly	307402	321920
Archaea	GCA_900106715.1_IMG-taxon_2693429892_annotated_assembly_genomic.fna	FNOF01000001.1	Haloarcula vallismortis strain DSM 3756 genome assembly	322166	378785
Archaea	GCA_900106715.1_IMG-taxon_2693429892_annotated_assembly_genomic.fna	FNOF01000001.1	Haloarcula vallismortis strain DSM 3756 genome assembly	379031	390496
Archaea	GCA_900106715.1_IMG-taxon_2693429892_annotated_assembly_genomic.fna	FNOF01000001.1	Haloarcula vallismortis strain DSM 3756 genome assembly	390742	405127
Archaea	GCA_900106715.1_IMG-taxon_2693429892_annotated_assembly_genomic.fna	FNOF01000001.1	Haloarcula vallismortis strain DSM 3756 genome assembly	405373	415892
Archaea	GCA_900106715.1_IMG-taxon_2693429892_annotated_assembly_genomic.fna	FNOF01000001.1	Haloarcula vallismortis strain DSM 3756 genome assembly	416138	430554
Archaea	GCA_900106715.1_IMG-taxon_2693429892_annotated_assembly_genomic.fna	FNOF01000001.1	Haloarcula vallismortis strain DSM 3756 genome assembly	430800	442836
Archaea	GCA_900106715.1_IMG-taxon_2693429892_annotated_assembly_genomic.fna	FNOF01000001.1	Haloarcula vallismortis strain DSM 3756 genome assembly	443082	458012
Archaea	GCA_900106715.1_IMG-taxon_2693429892_annotated_assembly_genomic.fna	FNOF01000001.1	Haloarcula vallismortis strain DSM 3756 genome assembly	458258	470841
Archaea	GCA_900106715.1_IMG-taxon_2693429892_annotated_assembly_genomic.fna	FNOF01000001.1	Haloarcula vallismortis strain DSM 3756 genome assembly	471087	485804
Archaea	GCA_900106715.1_IMG-taxon_2693429892_annotated_assembly_genomic.fna	FNOF01000001.1	Haloarcula vallismortis strain DSM 3756 genome assembly	486050	513472
Archaea	GCA_900106715.1_IMG-taxon_2693429892_annotated_assembly_genomic.fna	FNOF01000001.1	Haloarcula vallismortis strain DSM 3756 genome assembly	513718	526183
Archaea	GCA_900109065.1_IMG-taxon_2693429898_annotated_assembly_genomic.fna	FNYR01000001.1	Halohasta litchfieldiae strain DSM 22187 genome assembly	1	18559
Archaea	GCA_900109065.1_IMG-taxon_2693429898_annotated_assembly_genomic.fna	FNYR01000001.1	Halohasta litchfieldiae strain DSM 22187 genome assembly	19604	66199
Archaea	GCA_900109065.1_IMG-taxon_2693429898_annotated_assembly_genomic.fna	FNYR01000001.1	Halohasta litchfieldiae strain DSM 22187 genome assembly	67244	86198
Archaea	GCA_900109065.1_IMG-taxon_2693429898_annotated_assembly_genomic.fna	FNYR01000001.1	Halohasta litchfieldiae strain DSM 22187 genome assembly	87243	128208
Archaea	GCA_900109065.1_IMG-taxon_2693429898_annotated_assembly_genomic.fna	FNYR01000001.1	Halohasta litchfieldiae strain DSM 22187 genome assembly	129253	139605
Archaea	GCA_900109065.1_IMG-taxon_2693429898_annotated_assembly_genomic.fna	FNYR01000001.1	Halohasta litchfieldiae strain DSM 22187 genome assembly	140650	201841
Archaea	GCA_900109065.1_IMG-taxon_2693429898_annotated_assembly_genomic.fna	FNYR01000001.1	Halohasta litchfieldiae strain DSM 22187 genome assembly	202886	214321
Archaea	GCA_900109065.1_IMG-taxon_2693429898_annotated_assembly_genomic.fna	FNYR01000001.1	Halohasta litchfieldiae strain DSM 22187 genome assembly	215366	263987
Bacteria	NC_005364.2.fa	NC_005364.2	Mycoplasma mycoides subsp. mycoides SC	196312	205524
Bacteria	NC_005364.2.fa	NC_005364.2	Mycoplasma mycoides subsp. mycoides SC	198928	204497
Bacteria	NC_005364.2.fa	NC_005364.2	Mycoplasma mycoides subsp. mycoides SC	140520	150071
Bacteria	NC_005364.2.fa	NC_005364.2	Mycoplasma mycoides subsp. mycoides SC	631189	661749
Bacteria	NC_005364.2.fa	NC_005364.2	Mycoplasma mycoides subsp. mycoides SC	576608	588653
Bacteria	NC_005364.2.fa	NC_005364.2	Mycoplasma mycoides subsp. mycoides SC	801550	807715
Bacteria	NC_005364.2.fa	NC_005364.2	Mycoplasma mycoides subsp. mycoides SC	1139579	1145071
Bacteria	NC_005364.2.fa	NC_005364.2	Mycoplasma mycoides subsp. mycoides SC	398303	403836
Bacteria	NC_005364.2.fa	NC_005364.2	Mycoplasma mycoides subsp. mycoides SC	258976	265808
Bacteria	NC_005364.2.fa	NC_005364.2	Mycoplasma mycoides subsp. mycoides SC	253607	270398
Bacteria	NC_005364.2.fa	NC_005364.2	Mycoplasma mycoides subsp. mycoides SC	590766	596058
Bacteria	NC_005364.2.fa	NC_005364.2	Mycoplasma mycoides subsp. mycoides SC	748740	763682
Bacteria	NC_005364.2.fa	NC_005364.2	Mycoplasma mycoides subsp. mycoides SC	731888	737215
Bacteria	NC_005364.2.fa	NC_005364.2	Mycoplasma mycoides subsp. mycoides SC	387050	404209
Bacteria	NC_005364.2.fa	NC_005364.2	Mycoplasma mycoides subsp. mycoides SC	321848	332242
Bacteria	NC_005364.2.fa	NC_005364.2	Mycoplasma mycoides subsp. mycoides SC	178691	185088
Bacteria	NC_005364.2.fa	NC_005364.2	Mycoplasma mycoides subsp. mycoides SC	159801	165327
Bacteria	NC_005364.2.fa	NC_005364.2	Mycoplasma mycoides subsp. mycoides SC	496606	539931
Bacteria	NC_005364.2.fa	NC_005364.2	Mycoplasma mycoides subsp. mycoides SC	1181365	1205357
Bacteria	NC_005364.2.fa	NC_005364.2	Mycoplasma mycoides subsp. mycoides SC	1150375	1163829
Bacteria	NC_005364.2.fa	NC_005364.2	Mycoplasma mycoides subsp. mycoides SC	285500	306601
Bacteria	NC_006908.1.fa	NC_006908.1	Mycoplasma mobile 163K	394912	414562
Bacteria	NC_006908.1.fa	NC_006908.1	Mycoplasma mobile 163K	756139	762524
Bacteria	NC_006908.1.fa	NC_006908.1	Mycoplasma mobile 163K	683594	708206
Bacteria	NC_006908.1.fa	NC_006908.1	Mycoplasma mobile 163K	684333	690136
Bacteria	NC_006908.1.fa	NC_006908.1	Mycoplasma mobile 163K	456876	464063
Bacteria	NC_006908.1.fa	NC_006908.1	Mycoplasma mobile 163K	499457	521075
Bacteria	NC_006908.1.fa	NC_006908.1	Mycoplasma mobile 163K	350831	356005
Bacteria	NC_006908.1.fa	NC_006908.1	Mycoplasma mobile 163K	178614	186501
Bacteria	NC_006908.1.fa	NC_006908.1	Mycoplasma mobile 163K	9079	19443
Bacteria	NC_006908.1.fa	NC_006908.1	Mycoplasma mobile 163K	535613	554099
Bacteria	NC_006908.1.fa	NC_006908.1	Mycoplasma mobile 163K	197258	204847
Bacteria	NC_006908.1.fa	NC_006908.1	Mycoplasma mobile 163K	678138	683426
Bacteria	NC_006908.1.fa	NC_006908.1	Mycoplasma mobile 163K	446398	452121
Bacteria	NC_006908.1.fa	NC_006908.1	Mycoplasma mobile 163K	101196	106827
Bacteria	NC_006908.1.fa	NC_006908.1	Mycoplasma mobile 163K	763446	769252
Bacteria	NC_006908.1.fa	NC_006908.1	Mycoplasma mobile 163K	661905	669156
Bacteria	NC_006908.1.fa	NC_006908.1	Mycoplasma mobile 163K	529172	540656
Bacteria	NC_006908.1.fa	NC_006908.1	Mycoplasma mobile 163K	414453	450355
Bacteria	NC_006908.1.fa	NC_006908.1	Mycoplasma mobile 163K	389338	398829
Bacteria	NC_006908.1.fa	NC_006908.1	Mycoplasma mobile 163K	400249	407457
Bacteria	NC_006908.1.fa	NC_006908.1	Mycoplasma mobile 163K	19081	24211
Bacteria	NC_006908.1.fa	NC_006908.1	Mycoplasma mobile 163K	373364	378791
Bacteria	NC_006908.1.fa	NC_006908.1	Mycoplasma mobile 163K	744613	755241
Bacteria	NC_006908.1.fa	NC_006908.1	Mycoplasma mobile 163K	640066	651154
Bacteria	NC_006908.1.fa	NC_006908.1	Mycoplasma mobile 163K	539176	544604
Bacteria	NC_006908.1.fa	NC_006908.1	Mycoplasma mobile 163K	165629	171360
Bacteria	NC_006908.1.fa	NC_006908.1	Mycoplasma mobile 163K	359851	391094
Bacteria	NC_006908.1.fa	NC_006908.1	Mycoplasma mobile 163K	62713	76048
Bacteria	NC_006908.1.fa	NC_006908.1	Mycoplasma mobile 163K	442584	448155
Bacteria	NC_006908.1.fa	NC_006908.1	Mycoplasma mobile 163K	534463	543782
Bacteria	NC_006908.1.fa	NC_006908.1	Mycoplasma mobile 163K	304164	310970
Bacteria	NC_006908.1.fa	NC_006908.1	Mycoplasma mobile 163K	743244	749333
Bacteria	NC_006908.1.fa	NC_006908.1	Mycoplasma mobile 163K	586814	618458
Bacteria	NC_006908.1.fa	NC_006908.1	Mycoplasma mobile 163K	591820	626803
Bacteria	NC_006908.1.fa	NC_006908.1	Mycoplasma mobile 163K	655363	661464
Bacteria	NC_006908.1.fa	NC_006908.1	Mycoplasma mobile 163K	623244	628965
Bacteria	NC_006908.1.fa	NC_006908.1	Mycoplasma mobile 163K	255785	312173
Bacteria	NC_006908.1.fa	NC_006908.1	Mycoplasma mobile 163K	391789	397159
Bacteria	NC_006908.1.fa	NC_006908.1	Mycoplasma mobile 163K	282053	287970
Bacteria	NC_006908.1.fa	NC_006908.1	Mycoplasma mobile 163K	209824	216728
Bacteria	NC_006908.1.fa	NC_006908.1	Mycoplasma mobile 163K	268333	273973
Bacteria	NC_006908.1.fa	NC_006908.1	Mycoplasma mobile 163K	322683	328468
Bacteria	NC_006908.1.fa	NC_006908.1	Mycoplasma mobile 163K	686849	692887
Bacteria	NC_006908.1.fa	NC_006908.1	Mycoplasma mobile 163K	117125	122168
Bacteria	NC_006908.1.fa	NC_006908.1	Mycoplasma mobile 163K	56676	66487
Bacteria	NC_006908.1.fa	NC_006908.1	Mycoplasma mobile 163K	615054	621655
Bacteria	NC_006908.1.fa	NC_006908.1	Mycoplasma mobile 163K	299665	310653
Bacteria	NC_006908.1.fa	NC_006908.1	Mycoplasma mobile 163K	211721	218476
Bacteria	NC_006908.1.fa	NC_006908.1	Mycoplasma mobile 163K	707999	713477
Bacteria	NC_006908.1.fa	NC_006908.1	Mycoplasma mobile 163K	767028	772624
Bacteria	NC_006908.1.fa	NC_006908.1	Mycoplasma mobile 163K	341360	346939
Bacteria	NC_006908.1.fa	NC_006908.1	Mycoplasma mobile 163K	224681	234183
Bacteria	NC_006908.1.fa	NC_006908.1	Mycoplasma mobile 163K	528488	542422
Bacteria	NC_013515.1.fa	NC_013515.1	Streptobacillus moniliformis DSM 12112	188878	194414
Bacteria	NC_013515.1.fa	NC_013515.1	Streptobacillus moniliformis DSM 12112	420700	426325
Bacteria	NC_013515.1.fa	NC_013515.1	Streptobacillus moniliformis DSM 12112	409588	415306
Bacteria	NC_013515.1.fa	NC_013515.1	Streptobacillus moniliformis DSM 12112	1311187	1325456
Bacteria	NC_013515.1.fa	NC_013515.1	Streptobacillus moniliformis DSM 12112	1436773	1442666
Bacteria	NC_013515.1.fa	NC_013515.1	Streptobacillus moniliformis DSM 12112	1459683	1468398
Bacteria	NC_013515.1.fa	NC_013515.1	Streptobacillus moniliformis DSM 12112	1478315	1488092
Bacteria	NC_013515.1.fa	NC_013515.1	Streptobacillus moniliformis DSM 12112	151944	166487
Bacteria	NC_013515.1.fa	NC_013515.1	Streptobacillus moniliformis DSM 12112	1224507	1229989
Bacteria	NC_013515.1.fa	NC_013515.1	Streptobacillus moniliformis DSM 12112	146960	156061
Bacteria	NC_013515.1.fa	NC_013515.1	Streptobacillus moniliformis DSM 12112	1060904	1084007
Bacteria	NC_013515.1.fa	NC_013515.1	Streptobacillus moniliformis DSM 12112	887498	892903
Bacteria	NC_013515.1.fa	NC_013515.1	Streptobacillus moniliformis DSM 12112	861156	868012
Bacteria	NC_013515.1.fa	NC_013515.1	Streptobacillus moniliformis DSM 12112	512134	518511
Bacteria	NC_013515.1.fa	NC_013515.1	Streptobacillus moniliformis DSM 12112	786091	791923
Bacteria	NC_013515.1.fa	NC_013515.1	Streptobacillus moniliformis DSM 12112	1422132	1427280
Bacteria	NC_013515.1.fa	NC_013515.1	Streptobacillus moniliformis DSM 12112	657590	662661
Bacteria	NC_013515.1.fa	NC_013515.1	Streptobacillus moniliformis DSM 12112	1562947	1568677
Bacteria	NC_013515.1.fa	NC_013515.1	Streptobacillus moniliformis DSM 12112	1468531	1476777
Bacteria	NC_013515.1.fa	NC_013515.1	Streptobacillus moniliformis DSM 12112	1619544	1626815
Bacteria	NC_013515.1.fa	NC_013515.1	Streptobacillus moniliformis DSM 12112	1086135	1094748
Bacteria	NC_013515.1.fa	NC_013515.1	Streptobacillus moniliformis DSM 12112	719127	726344
Bacteria	NC_013515.1.fa	NC_013515.1	Streptobacillus moniliformis DSM 12112	95617	109176
Bacteria	NC_013515.1.fa	NC_013515.1	Streptobacillus moniliformis DSM 12112	1177099	1197284
Bacteria	NC_013515.1.fa	NC_013515.1	Streptobacillus moniliformis DSM 12112	1492311	1497665
Bacteria	NC_013515.1.fa	NC_013515.1	Streptobacillus moniliformis DSM 12112	1512045	1524779
Bacteria	NC_013515.1.fa	NC_013515.1	Streptobacillus moniliformis DSM 12112	748806	764528
Bacteria	NC_013515.1.fa	NC_013515.1	Streptobacillus moniliformis DSM 12112	268294	273985
Bacteria	NC_013515.1.fa	NC_013515.1	Streptobacillus moniliformis DSM 12112	1482221	1489273
Bacteria	NC_013515.1.fa	NC_013515.1	Streptobacillus moniliformis DSM 12112	1651511	1658925
Bacteria	NC_013515.1.fa	NC_013515.1	Streptobacillus moniliformis DSM 12112	950400	956452
Bacteria	NC_013515.1.fa	NC_013515.1	Streptobacillus moniliformis DSM 12112	1569248	1574883
Bacteria	NC_013515.1.fa	NC_013515.1	Streptobacillus moniliformis DSM 12112	1245868	1264842
Bacteria	NC_013515.1.fa	NC_013515.1	Streptobacillus moniliformis DSM 12112	1235190	1240385
Bacteria	NC_013515.1.fa	NC_013515.1	Streptobacillus moniliformis DSM 12112	1482355	1488794
Bacteria	NC_013515.1.fa	NC_013515.1	Streptobacillus moniliformis DSM 12112	919959	928369
Bacteria	NC_013515.1.fa	NC_013515.1	Streptobacillus moniliformis DSM 12112	408993	416283
Bacteria	NC_013515.1.fa	NC_013515.1	Streptobacillus moniliformis DSM 12112	694415	705546
Bacteria	NC_013515.1.fa	NC_013515.1	Streptobacillus moniliformis DSM 12112	827788	850625
[truncated: 36,259 more rows]

## Sheet: TS5
Table S5. Evalue thresholds calculated to select marker genes for phylogeny through psiblast
Marker gene	Evalue threshold
mcp	2.3875E-45
pATPase	1.72E-31
polB	1.67E-53
primase	1.4675E-36
rpo1	1.36E-68
rpo2	1.79E-74
vltF3	0.000000001065

## Sheet: TS6
Table S6. JGI IMG/M terrestrial metagenomes analyzed
Portal	Study Name	Phylum	Class	Order	Family	Genus	Latitude	Longitude	contigsOver500b	contigsOver1kb	contigsOver10kb	Nucleocytoviricota contigs
MicForSoiBWC17_O_FD	Forest soil microbial communities from Harvard Forest Long Term Ecological Research (LTER) site in Petersham, MA, for long-term soil warming studies	Environmental	Terrestrial	Soil	Loam	Forest soil	42.4711	-72.1726	12732	1831	0	0
OrgsoiDNA2013049_FD	Permafrost soil microbial communities from the Arctic, to analyse light accelerated degradation of dissolved organic matter (DOM)	Environmental	Terrestrial	Soil	Wetlands	Permafrost	68.6135	-149.314	288361	101269	1659	0
PersoiDNA2013193_FD	Permafrost soil microbial communities from the Arctic, to analyse light accelerated degradation of dissolved organic matter (DOM)	Environmental	Terrestrial	Soil	Wetlands	Permafrost	68.6135	-149.314	199338	52994	489	0
EasRivMeERMLT890_FD	Soil and sediment microbial communities from the East River, CO, USA	Environmental	Terrestrial	Soil	Floodplain	Unclassified	38.9223	-106.952	148641	41706	906	1
NitcycUWRBECK03D_FD	Soil microbial communities from Arlington Agricultural Research Station in Wisconsin and Kellogg Biological Station in Michigan, replicating the bioenergy cropping systems trials (BCSTs)	Environmental	Terrestrial	Soil	Unclassified	Agricultural land	43.3	-89.38	1780	86	0	0
ForSoiNitroNN577_FD	Soil microbial communities from 10 grassland sites in CA, CO, KS, KY, MN, MO, NM, SC, TX, that have been nitrogen fertilized	Environmental	Terrestrial	Soil	Loam	Grasslands	39.0709	-96.5828	2596	265	0	0
MayberryNE_Catta_6_FD	Natural and restored wetland microbial communities from the San Francisco Bay, California, USA, that impact long-term carbon sequestration	Environmental	Terrestrial	Soil	Wetlands	Unclassified	38.0525	-121.769	31963	8409	40	0
MayberryNE_Catta_2_FD	Natural and restored wetland microbial communities from the San Francisco Bay, California, USA, that impact long-term carbon sequestration	Environmental	Terrestrial	Soil	Wetlands	Unclassified	38.0525	-121.769	34092	8323	15	0
SoimicmetaGmgLAA_FD	Soil and rhizosphere microbial communities from Centre INRS-Institut Armand-Frappier, Laval, Canada	Environmental	Terrestrial	Soil	Unclassified	Unclassified	45.54	-73.72	3583	302	0	0
Browns_TuleB_D1_FD	Natural and restored wetland microbial communities from the San Francisco Bay, California, USA, that impact long-term carbon sequestration	Environmental	Terrestrial	Soil	Wetlands	Unclassified	38.0457	-121.866	41696	8177	9	0
MicForSoiBWC19_O_FD	Forest soil microbial communities from Harvard Forest Long Term Ecological Research (LTER) site in Petersham, MA, for long-term soil warming studies	Environmental	Terrestrial	Soil	Loam	Forest soil	42.4711	-72.1726	1434	265	0	0
NGEPer4B_FD	Arctic peat soil microbial communities from the Barrow Environmental Observatory site, Barrow, Alaska, USA	Environmental	Terrestrial	Soil	Unclassified	Permafrost	71.299	-156.61	21443	3385	12	0
LuqExpMetageno45_FD	Tropical forest soil microbial communities from Luquillo Experimental Forest, Puerto Rico	Environmental	Terrestrial	Soil	Loam	Forest soil	18	-65	94565	28567	585	0
TexAe_OM1H0_O2_FD	Forest soil microbial communities from multiple locations in Canada and USA	Environmental	Terrestrial	Soil	Loam	Forest soil	31.11	-95.15	55744	10369	20	0
UWRJL028104C2_FD	Soil microbial communities from Arlington Agricultural Research Station in Wisconsin and Kellogg Biological Station in Michigan, replicating the bioenergy cropping systems trials (BCSTs)	Environmental	Terrestrial	Plant litter	Unclassified	Unclassified	43.3	-89.38	211864	73056	1516	2
GraSoiAngelo_147_FD	Grasslands soil microbial communities from the Angelo Coastal Reserve, California, USA	Environmental	Terrestrial	Soil	Unclassified	Grasslands	39.7392	-123.631	368009	166623	5393	0
NGEPerD_FD	Arctic peat soil microbial communities from the Barrow Environmental Observatory site, Barrow, Alaska, USA	Environmental	Terrestrial	Soil	Unclassified	Permafrost	71.299	-156.61	229877	115047	804	0
MicForSoilPHH8_O_FD	Forest soil microbial communities from Harvard Forest Long Term Ecological Research (LTER) site in Petersham, MA, for long-term soil warming studies	Environmental	Terrestrial	Soil	Loam	Forest soil	42.5504	-72.1802	42510	9198	1	0
UWRJL169409C1_FD	Soil microbial communities from Arlington Agricultural Research Station in Wisconsin and Kellogg Biological Station in Michigan, replicating the bioenergy cropping systems trials (BCSTs)	Environmental	Terrestrial	Plant litter	Unclassified	Unclassified	43.3	-89.38	399729	128706	3532	3
CNK12_metaG_FD	Soil microbial communities from Purdue University Martell Research Forest, Indiana, United States	Environmental	Terrestrial	Soil	Unclassified	Forest Soil	40.4449	-87.0297	97497	20073	658	0
UWRJS184509B5_FD	Soil microbial communities from Arlington Agricultural Research Station in Wisconsin and Kellogg Biological Station in Michigan, replicating the bioenergy cropping systems trials (BCSTs)	Environmental	Terrestrial	Soil	Unclassified	Agricultural land	43.3	-89.38	205164	46611	93	0
NGESurshal072012_6_FD	Arctic peat soil microbial communities from the Barrow Environmental Observatory site, Barrow, Alaska, USA	Environmental	Terrestrial	Soil	Unclassified	Permafrost	71.2999	-156.61	142908	45551	899	0
TexAe_OM1H0_O1_FD	Forest soil microbial communities from multiple locations in Canada and USA	Environmental	Terrestrial	Soil	Loam	Forest soil	31.11	-95.15	30100	5414	13	0
NitcycUWRG07A512_FD	Soil microbial communities from Arlington Agricultural Research Station in Wisconsin and Kellogg Biological Station in Michigan, replicating the bioenergy cropping systems trials (BCSTs)	Environmental	Terrestrial	Soil	Unclassified	Agricultural land	43.3	-89.38	4362	433	0	0
MedBloCAOM2_M3_FD	Forest soil microbial communities from multiple locations in Canada and USA	Environmental	Terrestrial	Soil	Loam	Forest soil	38.88	-120.64	111479	27921	78	0
NitcycUWRG08A312_FD	Soil microbial communities from Arlington Agricultural Research Station in Wisconsin and Kellogg Biological Station in Michigan, replicating the bioenergy cropping systems trials (BCSTs)	Environmental	Terrestrial	Soil	Unclassified	Agricultural land	43.3	-89.38	4704	576	0	0
GEONDECOMP233_FD	Soil and plant litter microbial communities from temperate forests in California, United States	Environmental	Terrestrial	Plant litter	Unclassified	Unclassified	40.2198	-122.984	18908	3446	20	0
SF_Rice_10C_80N__3_FD	Natural and restored wetland microbial communities from the San Francisco Bay, California, USA, that impact long-term carbon sequestration	Environmental	Terrestrial	Soil	Unclassified	Agricultural land	38.1087	-121.653	28684	4319	0	0
CNK20_metaG_FD	Soil microbial communities from Purdue University Martell Research Forest, Indiana, United States	Environmental	Terrestrial	Soil	Unclassified	Forest Soil	40.4449	-87.0297	97253	25472	323	0
ForSoiNitroNN352_FD	Soil microbial communities from 10 grassland sites in CA, CO, KS, KY, MN, MO, NM, SC, TX, that have been nitrogen fertilized	Environmental	Terrestrial	Soil	Loam	Grasslands	35.913	-79.056	1166	132	0	0
UWRJL134311R1_FD	Soil microbial communities from Arlington Agricultural Research Station in Wisconsin and Kellogg Biological Station in Michigan, replicating the bioenergy cropping systems trials (BCSTs)	Environmental	Terrestrial	Plant litter	Unclassified	Unclassified	43.3	-89.38	198884	49277	650	0
JacPin_JW_Ref_O3_FD	Forest soil microbial communities from multiple locations in Canada and USA	Environmental	Terrestrial	Soil	Loam	Forest soil	46.42	-83.37	156491	45894	667	0
JacPinW_OM3H0_M3_FD	Forest soil microbial communities from multiple locations in Canada and USA	Environmental	Terrestrial	Soil	Loam	Forest soil	46.42	-83.37	175543	55325	936	0
I_Fen_E2_2_FD	Peat permafrost microbial communities from Stordalen Mire near Abisko, Sweden	Environmental	Terrestrial	Soil	Peat	Fen	68.3532	19.0469	197768	44673	568	1
44E_NmetaG_FD	Soil microbial communities from hillslopes of Landscape Evolution Observatory, University of Arizona, Oracle, AZ, United States	Environmental	Terrestrial	Soil	Unclassified	Unclassified	32.5788	-110.851	3465	381	1	0
GraSoiAngelo_114_FD	Grasslands soil microbial communities from the Angelo Coastal Reserve, California, USA	Environmental	Terrestrial	Soil	Unclassified	Grasslands	39.7392	-123.631	738421	338729	9366	0
MicForSoSWNH18_M_FD	Forest soil microbial communities from Harvard Forest Long Term Ecological Research (LTER) site in Petersham, MA, for long-term soil warming studies	Environmental	Terrestrial	Soil	Loam	Forest soil	42.533	-72.2095	14789	2789	0	0
NitcycUWRG10A410_FD	Soil microbial communities from Arlington Agricultural Research Station in Wisconsin and Kellogg Biological Station in Michigan, replicating the bioenergy cropping systems trials (BCSTs)	Environmental	Terrestrial	Soil	Unclassified	Agricultural land	43.2958	-89.3799	7353	439	0	0
NitcycUWRG10A411_FD	Soil microbial communities from Arlington Agricultural Research Station in Wisconsin and Kellogg Biological Station in Michigan, replicating the bioenergy cropping systems trials (BCSTs)	Environmental	Terrestrial	Soil	Unclassified	Agricultural land	43.2958	-89.3799	7006	743	0	0
NGEPerone_FD	Arctic peat soil microbial communities from the Barrow Environmental Observatory site, Barrow, Alaska, USA	Environmental	Terrestrial	Soil	Unclassified	Permafrost	71.299	-156.61	300721	121085	1223	0
PerMet712P3D_FD	Thawing permafrost microbial communities from the Arctic, studying carbon transformations	Environmental	Terrestrial	Soil	Wetlands	Permafrost	68.3534	19.0472	22741	4790	43	0
ER_DNA_196_FD	Soil microbial communities from the East River watershed near Crested Butte, Colorado, United States	Environmental	Terrestrial	Soil	Bulk soil	Meadow	38.9206	-106.949	228015	38981	35	0
P3T30metagenome_FD	Plant litter microbial communities from East Loma Ridge, Irvine, California	Environmental	Terrestrial	Plant litter	Unclassified	Unclassified	33.7417	-117.704	1142895	443679	12983	6
GRESIP052b4f22_FD	Lab enrichment of tropical soil microbial communities from Luquillo Experimental Forest, Puerto Rico	Environmental	Terrestrial	Soil	Unclassified	Forest Soil	18.321	-65.8172	797602	208604	1033	0
DL17A_FD	Soil microbial communities from H.J. Andrews Experimental Forest, Oregon, United States	Environmental	Terrestrial	Soil	Unclassified	Forest Soil	44.23	-122.22	41594	9707	3	0
BatPronordMG_FD	Rock endolithic microbial communities from Victoria Land, Antarctica	Environmental	Terrestrial	Rock-dwelling (endoliths)	Unclassified	Unclassified	-76.9	160.9	153804	93436	5441	8
NitcycUWRHINK07B_FD	Soil microbial communities from Arlington Agricultural Research Station in Wisconsin and Kellogg Biological Station in Michigan, replicating the bioenergy cropping systems trials (BCSTs)	Environmental	Terrestrial	Soil	Unclassified	Agricultural land	43.43	-89.41	1311	85	0	0
CFST50metaG_FD	Peatland microbial communities from Stordalen Mire, Sweden	Environmental	Terrestrial	Soil	Peat	Mire	68.3533	19.0466	159637	52794	1465	0
Subbio2Aug_QV11A_FD	Serpentinite rock and fluid microbial communities from Tablelands Ophiolite (Newfoundland), Coast Range Ophiolite (California) and Ligurian Springs (Italy)	Environmental	Terrestrial	Deep subsurface	Unclassified	Unclassified	38.874	-122.439	6030	2878	260	0
tim00Cox00000000_FD	Lab enrichment of tropical soil microbial communities from Luquillo Experimental Forest, Puerto Rico	Environmental	Terrestrial	Soil	Unclassified	Forest Soil	18.321	-65.8172	1602781	457761	2039	0
714P315metaG_FD	Peatland microbial communities from Stordalen Mire, Sweden	Environmental	Terrestrial	Soil	Peat	Mire	68.3535	19.0472	65020	17562	70	0
II_Fen_E1_4_FD	Peat permafrost microbial communities from Stordalen Mire near Abisko, Sweden	Environmental	Terrestrial	Soil	Peat	Fen	68.3532	19.0469	143095	37872	268	0
SF_Rice_20C_80N__2_FD	Natural and restored wetland microbial communities from the San Francisco Bay, California, USA, that impact long-term carbon sequestration	Environmental	Terrestrial	Soil	Unclassified	Agricultural land	38.1087	-121.653	25514	5272	1	0
GWRWS1_40_50_FD	Groundwater microbial communities from the Columbia River, Washington, USA	Environmental	Terrestrial	Soil	Sand	Unclassified	46.372	-119.272	15258	2115	5	0
RifCSPhighO2_01_FD	Soil microbial communities from Rifle, Colorado, USA	Environmental	Terrestrial	Soil	Loam	Unclassified	39.5348	-107.783	1036435	444727	21821	56
714E159metaG_FD	Peatland microbial communities from Stordalen Mire, Sweden	Environmental	Terrestrial	Soil	Peat	Mire	68.3533	19.0467	131260	33536	537	1
NitcycUWRG08K212_FD	Soil microbial communities from Arlington Agricultural Research Station in Wisconsin and Kellogg Biological Station in Michigan, replicating the bioenergy cropping systems trials (BCSTs)	Environmental	Terrestrial	Soil	Unclassified	Agricultural land	42.4	-85.37	2165	251	0	0
NitcycUWG06A2a12_FD	Soil microbial communities from Arlington Agricultural Research Station in Wisconsin and Kellogg Biological Station in Michigan, replicating the bioenergy cropping systems trials (BCSTs)	Environmental	Terrestrial	Soil	Unclassified	Agricultural land	43.3	-89.38	6367	613	0	0
MSEWel2015_12_15_FD	Subsurface microbial communities from deep shales in Ohio and West Virginia, USA	Environmental	Terrestrial	Geologic	Sediment	Unclassified	39.6017	-79.9761	7428	4468	675	0
NitcycUWG05A1w11_FD	Soil microbial communities from Arlington Agricultural Research Station in Wisconsin and Kellogg Biological Station in Michigan, replicating the bioenergy cropping systems trials (BCSTs)	Environmental	Terrestrial	Soil	Unclassified	Agricultural land	43.3	-89.38	3934	585	0	0
III_Palsa_N2_2_FD	Peat permafrost microbial communities from Stordalen Mire near Abisko, Sweden	Environmental	Terrestrial	Soil	Peat	Permafrost	68.3535	19.0473	469047	137685	3639	4
Shrwel_input2_RT_FD	Subsurface microbial communities from deep shales in Ohio and West Virginia, USA	Environmental	Terrestrial	Deep subsurface	Unclassified	Unclassified	39.849	-81.036	76777	33223	1332	1
714S23034metaG_FD	Peatland microbial communities from Stordalen Mire, Sweden	Environmental	Terrestrial	Soil	Peat	Mire	68.3532	19.0474	227959	88198	5834	1
GEONDECOMP296_FD	Soil and plant litter microbial communities from temperate forests in California, United States	Environmental	Terrestrial	Plant litter	Unclassified	Unclassified	40.2198	-122.984	24797	5503	26	0
NitcycUWRROWE15D_FD	Soil microbial communities from Arlington Agricultural Research Station in Wisconsin and Kellogg Biological Station in Michigan, replicating the bioenergy cropping systems trials (BCSTs)	Environmental	Terrestrial	Soil	Unclassified	Agricultural land	43.42	-89.33	13164	1847	0	0
GRESIP174b1f20_FD	Lab enrichment of tropical soil microbial communities from Luquillo Experimental Forest, Puerto Rico	Environmental	Terrestrial	Soil	Unclassified	Forest Soil	18.321	-65.8172	749301	182448	322	0
GWRWT4_2Sept14_FD	Groundwater microbial communities from the Columbia River, Washington, USA	Environmental	Terrestrial	Soil	Sand	Unclassified	46.372	-119.272	12981	4316	54	0
MicForSoiBWH17_M_FD	Forest soil microbial communities from Harvard Forest Long Term Ecological Research (LTER) site in Petersham, MA, for long-term soil warming studies	Environmental	Terrestrial	Soil	Loam	Forest soil	42.4711	-72.1726	4317	633	0	0
GraSoi013_1_20cm_FD	Grasslands soil microbial communities from the Angelo Coastal Reserve, California, USA	Environmental	Terrestrial	Soil	Unclassified	Grasslands	39.7383	-123.63	283238	97697	1185	0
ForSoiNitroNN614_FD	Soil microbial communities from 10 grassland sites in CA, CO, KS, KY, MN, MO, NM, SC, TX, that have been nitrogen fertilized	Environmental	Terrestrial	Soil	Loam	Grasslands	39.05	-99.1	24	2	0	0
LuqExpMetageno35_FD	Tropical forest soil microbial communities from Luquillo Experimental Forest, Puerto Rico	Environmental	Terrestrial	Soil	Loam	Forest soil	18	-65	100031	30185	570	0
SF_Rice_20C_80N__FD	Natural and restored wetland microbial communities from the San Francisco Bay, California, USA, that impact long-term carbon sequestration	Environmental	Terrestrial	Soil	Unclassified	Agricultural land	38.1087	-121.653	30158	6714	1	0
GWRWT2_30Apr14_FD	Groundwater microbial communities from the Columbia River, Washington, USA	Environmental	Terrestrial	Soil	Sand	Unclassified	46.372	-119.272	51456	12254	173	0
NitcycUWG10A4w11_FD	Soil microbial communities from Arlington Agricultural Research Station in Wisconsin and Kellogg Biological Station in Michigan, replicating the bioenergy cropping systems trials (BCSTs)	Environmental	Terrestrial	Soil	Unclassified	Agricultural land	43.3	-89.38	5607	480	0	0
atmos_gasesAM5C__FD	Hardwood forest soil microbial communities from various locations in the United States	Environmental	Terrestrial	Soil	Unclassified	Forest Soil	39.0844	-86.4705	1580217	308427	353	0
SoimicmetaGmgHAB_FD	Soil and rhizosphere microbial communities from Centre INRS-Institut Armand-Frappier, Laval, Canada	Environmental	Terrestrial	Soil	Unclassified	Unclassified	45.54	-73.72	9732	1656	62	0
T60D3metaG_FD	Soil microbial communities from West Virginia University Organic Research Farm, Morgantown, WV, United States	Environmental	Terrestrial	Soil	Unclassified	Agricultural land	39.6475	-79.9369	1164783	245276	573	0
GraSoiAngelo_134_FD	Grasslands soil microbial communities from the Angelo Coastal Reserve, California, USA	Environmental	Terrestrial	Soil	Unclassified	Grasslands	39.7392	-123.631	420637	175893	5920	0
GWRWS3_30_40_FD	Groundwater microbial communities from the Columbia River, Washington, USA	Environmental	Terrestrial	Soil	Sand	Unclassified	46.372	-119.272	108451	23969	130	0
I_Bog_E1_1_FD	Peat permafrost microbial communities from Stordalen Mire near Abisko, Sweden	Environmental	Terrestrial	Soil	Peat	Bog	68.3532	19.0477	1228079	461390	13465	31
Joice_ThreeSqA_D_3_FD	Natural and restored wetland microbial communities from the San Francisco Bay, California, USA, that impact long-term carbon sequestration	Environmental	Terrestrial	Soil	Wetlands	Unclassified	38.1972	-122.01	36825	10266	269	0
ForSoiNitroNN407_FD	Soil microbial communities from 10 grassland sites in CA, CO, KS, KY, MN, MO, NM, SC, TX, that have been nitrogen fertilized	Environmental	Terrestrial	Soil	Loam	Forest soil	44.2052	-122.128	2869	292	0	0
WestPond_Cattail_FD	Natural and restored wetland microbial communities from the San Francisco Bay, California, USA, that impact long-term carbon sequestration	Environmental	Terrestrial	Soil	Wetlands	Unclassified	38.1075	-121.65	39006	7824	38	0
SF_Rice_10C_0N_4_FD	Natural and restored wetland microbial communities from the San Francisco Bay, California, USA, that impact long-term carbon sequestration	Environmental	Terrestrial	Soil	Unclassified	Agricultural land	38.1087	-121.653	59604	10882	2	0
Sb_taG_10_FD	Peatlands soil microbial communities from Germany and Austria, that are sulfate reducing	Environmental	Terrestrial	Soil	Unclassified	Unclassified	50.1318	11.881	196313	56720	869	0
NitcycUWRG07A210_FD	Soil microbial communities from Arlington Agricultural Research Station in Wisconsin and Kellogg Biological Station in Michigan, replicating the bioenergy cropping systems trials (BCSTs)	Environmental	Terrestrial	Soil	Unclassified	Agricultural land	43.3	-89.38	5833	597	0	0
GRESIP117b4f29_FD	Lab enrichment of tropical soil microbial communities from Luquillo Experimental Forest, Puerto Rico	Environmental	Terrestrial	Soil	Unclassified	Forest Soil	18.321	-65.8172	410405	114777	560	0
MetcocultureBM_FD	Systems level insights into methane cycling in arid and semi-arid ecosystems	Environmental	Terrestrial	Soil	Unclassified	Desert	33.305	-116.255	138	132	92	0
NGEPerthree_FD	Arctic peat soil microbial communities from the Barrow Environmental Observatory site, Barrow, Alaska, USA	Environmental	Terrestrial	Soil	Unclassified	Permafrost	71.299	-156.61	16281	2556	0	0
715E315metaG_FD	Peatland microbial communities from Stordalen Mire, Sweden	Environmental	Terrestrial	Soil	Peat	Mire	68.3533	19.0468	12601	1169	0	0
JacPinW_OM2H0_M3_FD	Forest soil microbial communities from multiple locations in Canada and USA	Environmental	Terrestrial	Soil	Loam	Forest soil	46.42	-83.37	155196	43107	133	0
NitcycUWRG01A511_FD	Soil microbial communities from Arlington Agricultural Research Station in Wisconsin and Kellogg Biological Station in Michigan, replicating the bioenergy cropping systems trials (BCSTs)	Environmental	Terrestrial	Soil	Unclassified	Agricultural land	43.2958	-89.3799	6393	518	0	0
NitcycUWRG08A211_FD	Soil microbial communities from Arlington Agricultural Research Station in Wisconsin and Kellogg Biological Station in Michigan, replicating the bioenergy cropping systems trials (BCSTs)	Environmental	Terrestrial	Soil	Unclassified	Agricultural land	43.3	-89.38	4769	1201	0	0
NitcycUWG10A1w12_FD	Soil microbial communities from Arlington Agricultural Research Station in Wisconsin and Kellogg Biological Station in Michigan, replicating the bioenergy cropping systems trials (BCSTs)	Environmental	Terrestrial	Soil	Unclassified	Agricultural land	43.3	-89.38	3546	325	0	0
Joice_CattailNLA_FD	Natural and restored wetland microbial communities from the San Francisco Bay, California, USA, that impact long-term carbon sequestration	Environmental	Terrestrial	Soil	Wetlands	Unclassified	38.1971	-122.01	44896	13006	186	0
ForSoiNitroNN342_FD	Soil microbial communities from 10 grassland sites in CA, CO, KS, KY, MN, MO, NM, SC, TX, that have been nitrogen fertilized	Environmental	Terrestrial	Soil	Loam	Grasslands	35.913	-79.056	458	64	0	0
BONnt1_FD	Terrestrial sediment cell enrichment communities for BONCAT metagenomics from Utah, United States	Environmental	Terrestrial	Geologic	Sediment	Unclassified	38.715	-109.691	32856	4137	4	0
CNK01_metaG_FD	Soil microbial communities from Purdue University Martell Research Forest, Indiana, United States	Environmental	Terrestrial	Soil	Unclassified	Forest Soil	40.4449	-87.0297	101563	22332	60	0
SGPome_FD	Soil and marine airborne microbial communities from various locations	Environmental	Terrestrial	Soil	Unclassified	Unclassified	36.36	-97.29	1161687	228256	746	0
NGEPerB_FD	Arctic peat soil microbial communities from the Barrow Environmental Observatory site, Barrow, Alaska, USA	Environmental	Terrestrial	Soil	Unclassified	Permafrost	71.299	-156.61	227803	92048	1481	0
NL07B_FD	Soil microbial communities from H.J. Andrews Experimental Forest, Oregon, United States	Environmental	Terrestrial	Soil	Unclassified	Forest Soil	44.23	-122.22	91586	17377	0	0
MayberryNE_Catta_4_FD	Natural and restored wetland microbial communities from the San Francisco Bay, California, USA, that impact long-term carbon sequestration	Environmental	Terrestrial	Soil	Wetlands	Unclassified	38.0525	-121.769	46327	11814	68	0
NitcycUWRG09A311_FD	Soil microbial communities from Arlington Agricultural Research Station in Wisconsin and Kellogg Biological Station in Michigan, replicating the bioenergy cropping systems trials (BCSTs)	Environmental	Terrestrial	Soil	Unclassified	Agricultural land	43.3	-89.38	2730	173	0	0
Shrwel1BS1Day59_FD	Subsurface microbial communities from deep shales in Ohio and West Virginia, USA	Environmental	Terrestrial	Deep subsurface	Unclassified	Unclassified	39.849	-81.036	8424	2176	42	0
ForSoiNitroNN588_FD	Soil microbial communities from 10 grassland sites in CA, CO, KS, KY, MN, MO, NM, SC, TX, that have been nitrogen fertilized	Environmental	Terrestrial	Soil	Loam	Grasslands	39.0709	-96.5828	1269	103	0	0
Antgeofumaro1A2E_FD	Fumarolic subsurface microbial communities from Tramway Ridge at Mt. Erebus, Antarctica for carbon cycling studies in geothermal environments	Environmental	Terrestrial	Volcanic	Fumaroles	Unclassified	-77.5182	167.111	948	563	44	0
UWRJL014104B1_FD	Soil microbial communities from Arlington Agricultural Research Station in Wisconsin and Kellogg Biological Station in Michigan, replicating the bioenergy cropping systems trials (BCSTs)	Environmental	Terrestrial	Plant litter	Unclassified	Unclassified	43.3	-89.38	339976	101843	2163	10
GFST75r2metaG_FD	Peatland microbial communities from Stordalen Mire, Sweden	Environmental	Terrestrial	Soil	Peat	Mire	68.3533	19.0466	24146	6085	364	4
GWRWN2_50_60_FD	Groundwater microbial communities from the Columbia River, Washington, USA	Environmental	Terrestrial	Soil	Sand	Unclassified	46.372	-119.272	60543	13299	103	0
NitcycUWRG10K112_FD	Soil microbial communities from Arlington Agricultural Research Station in Wisconsin and Kellogg Biological Station in Michigan, replicating the bioenergy cropping systems trials (BCSTs)	Environmental	Terrestrial	Soil	Unclassified	Agricultural land	42.4	-85.37	886	54	0	0
RushSE_CattailNL_5_FD	Natural and restored wetland microbial communities from the San Francisco Bay, California, USA, that impact long-term carbon sequestration	Environmental	Terrestrial	Soil	Wetlands	Unclassified	38.2245	-122.019	39101	6709	30	0
MicForSoiBWH19_O_FD	Forest soil microbial communities from Harvard Forest Long Term Ecological Research (LTER) site in Petersham, MA, for long-term soil warming studies	Environmental	Terrestrial	Soil	Loam	Forest soil	42.533	-72.1726	4989	755	0	0
ForSoiNitrogNN91_FD	Soil microbial communities from 10 grassland sites in CA, CO, KS, KY, MN, MO, NM, SC, TX, that have been nitrogen fertilized	Environmental	Terrestrial	Soil	Loam	Forest soil	39.2355	-121.284	24350	779	160	0
PerMet712S3S_FD	Thawing permafrost microbial communities from the Arctic, studying carbon transformations	Environmental	Terrestrial	Soil	Wetlands	Permafrost	68.3533	19.0475	56168	2118	0	0
UWRJL148409B2_FD	Soil microbial communities from Arlington Agricultural Research Station in Wisconsin and Kellogg Biological Station in Michigan, replicating the bioenergy cropping systems trials (BCSTs)	Environmental	Terrestrial	Plant litter	Unclassified	Unclassified	43.3	-89.38	308373	84098	1488	14
RifCSP19_2_FD	Soil microbial communities from Rifle, Colorado, USA	Environmental	Terrestrial	Soil	Unclassified	Unclassified	39.53	-107.78	787126	256797	3590	6
NitcycUWRG06K412_FD	Soil microbial communities from Arlington Agricultural Research Station in Wisconsin and Kellogg Biological Station in Michigan, replicating the bioenergy cropping systems trials (BCSTs)	Environmental	Terrestrial	Soil	Unclassified	Agricultural land	43.3	-89.38	5773	979	0	0
I_Bog_N2_1_FD	Peat permafrost microbial communities from Stordalen Mire near Abisko, Sweden	Environmental	Terrestrial	Soil	Peat	Bog	68.3532	19.0477	335703	83632	1481	2
715P115metaG_FD	Peatland microbial communities from Stordalen Mire, Sweden	Environmental	Terrestrial	Soil	Peat	Mire	68.3534	19.0471	125831	31078	1326	0
BlaSpr_A8_OM2_O2_FD	Forest soil microbial communities from multiple locations in Canada and USA	Environmental	Terrestrial	Soil	Loam	Forest soil	49.08	-89.38	140102	34032	63	0
GEONDECOMP273_FD	Soil and plant litter microbial communities from temperate forests in California, United States	Environmental	Terrestrial	Plant litter	Unclassified	Unclassified	40.2198	-122.984	24039	5432	455	0
JacPinW_OM1H0_O1_FD	Forest soil microbial communities from multiple locations in Canada and USA	Environmental	Terrestrial	Soil	Loam	Forest soil	46.42	-83.37	101512	26018	54	0
ForSoiNitrNN1102_FD	Soil microbial communities from 10 grassland sites in CA, CO, KS, KY, MN, MO, NM, SC, TX, that have been nitrogen fertilized	Environmental	Terrestrial	Soil	Loam	Grasslands	40.8167	-104.767	5121	1248	0	0
Methanogen_OWC_FD	Deep subsurface shale carbon reservoir microbial communities from Ohio and West Virginia, USA	Environmental	Terrestrial	Deep subsurface	Fracking water	Shale carbon reservoir	41.3769	-82.5172	304666	78161	222	0
LuqExpMetageno67_FD	Tropical forest soil microbial communities from Luquillo Experimental Forest, Puerto Rico	Environmental	Terrestrial	Soil	Loam	Forest soil	18	-65	39841	11478	169	0
GWRWN3_50_60_FD	Groundwater microbial communities from the Columbia River, Washington, USA	Environmental	Terrestrial	Soil	Sand	Unclassified	46.372	-119.272	33875	4210	74	0
ForSoiNitroNN336_FD	Soil microbial communities from 10 grassland sites in CA, CO, KS, KY, MN, MO, NM, SC, TX, that have been nitrogen fertilized	Environmental	Terrestrial	Soil	Loam	Grasslands	35.913	-79.056	678	94	1	0
III_Bog_E2_3_FD	Peat permafrost microbial communities from Stordalen Mire near Abisko, Sweden	Environmental	Terrestrial	Soil	Peat	Bog	68.3532	19.0477	729054	249359	7007	8
ER_DNA_367_FD	Soil microbial communities from the East River watershed near Crested Butte, Colorado, United States	Environmental	Terrestrial	Soil	Bulk soil	Meadow	38.9206	-106.949	379271	96324	875	0
TexAe_OM3H0_M3_FD	Forest soil microbial communities from multiple locations in Canada and USA	Environmental	Terrestrial	Soil	Loam	Forest soil	31.11	-95.15	120892	24445	14	0
GWRWT4_1July14_FD	Groundwater microbial communities from the Columbia River, Washington, USA	Environmental	Terrestrial	Soil	Sand	Unclassified	46.372	-119.272	15930	4483	49	0
SalPonR2_C_D1_MG_FD	Salt pond water, soil and salt crust microbial communities from South San Francisco under conditions of wetland restoration.	Environmental	Terrestrial	Soil	Wetlands	Unclassified	37.4965	-122.133	158370	75087	1936	5
NitcycUWRHINK07E_FD	Soil microbial communities from Arlington Agricultural Research Station in Wisconsin and Kellogg Biological Station in Michigan, replicating the bioenergy cropping systems trials (BCSTs)	Environmental	Terrestrial	Soil	Unclassified	Agricultural land	43.3	-89.38	2954	144	0	0
I_Palsa_E1_1_FD	Peat permafrost microbial communities from Stordalen Mire near Abisko, Sweden	Environmental	Terrestrial	Soil	Peat	Permafrost	68.3535	19.0473	484870	128357	1702	0
GWRWS2_50_60_FD	Groundwater microbial communities from the Columbia River, Washington, USA	Environmental	Terrestrial	Soil	Sand	Unclassified	46.372	-119.272	81349	23602	166	0
2ButaG_FD	Rhizosphere and bulk soil microbial communities from Harvard Forest, USA	Environmental	Terrestrial	Soil	Unclassified	Forest Soil	42.5502	-72.1737	436	37	0	0
SF_Rice_20C_0N_1_FD	Natural and restored wetland microbial communities from the San Francisco Bay, California, USA, that impact long-term carbon sequestration	Environmental	Terrestrial	Soil	Unclassified	Agricultural land	38.1087	-121.653	23259	4335	0	0
NitcycUWRHINK08B_FD	Soil microbial communities from Arlington Agricultural Research Station in Wisconsin and Kellogg Biological Station in Michigan, replicating the bioenergy cropping systems trials (BCSTs)	Environmental	Terrestrial	Soil	Unclassified	Agricultural land	43.42	-89.4	1100	52	0	0
RVTome_13_FD	Soil microbial communities from uranium-contaminated sites across the Upper Colorado River Basin region	Environmental	Terrestrial	Soil	Unclassified	Unclassified	42.9888	-108.399	1025440	350969	4667	0
NCCompost_FD	Agricultural soil microbial communities from Utah and Georgia to study Nitrogen management	Environmental	Terrestrial	Soil	Unclassified	Agricultural land	41.7655	-111.814	506097	264300	1527	0
2ButaG_2_FD	Rhizosphere and bulk soil microbial communities from Harvard Forest, USA	Environmental	Terrestrial	Soil	Unclassified	Forest Soil	42.5502	-72.1737	879	9	0	0
MedBloCAOM3_M2_FD	Forest soil microbial communities from multiple locations in Canada and USA	Environmental	Terrestrial	Soil	Loam	Forest soil	38.88	-120.64	252447	77723	487	0
PhyPR2_FD	Leaf surface microbial communities from various plants in UC Gill Tract Community Farm, Albany, California, United States	Environmental	Terrestrial	Soil	Unclassified	Agricultural land	37.8864	-122.298	1995287	494748	1914	2
14_S_MG_FD	Soil and ectomycorrhiza microbial communities from Populus trichocarpa stands in riparian zones in the Pacific Northwest, United States	Environmental	Terrestrial	Soil	Unclassified	Riparian soil	45.6996	-121.669	316926	51048	779	0
III_Bog_N2_1_FD	Peat permafrost microbial communities from Stordalen Mire near Abisko, Sweden	Environmental	Terrestrial	Soil	Peat	Bog	68.3532	19.0477	534698	196233	6167	7
UWRJL079202R5_FD	Soil microbial communities from Arlington Agricultural Research Station in Wisconsin and Kellogg Biological Station in Michigan, replicating the bioenergy cropping systems trials (BCSTs)	Environmental	Terrestrial	Plant litter	Unclassified	Unclassified	43.3	-89.38	235049	55510	1836	2
Sb_taG_8_FD	Peatlands soil microbial communities from Germany and Austria, that are sulfate reducing	Environmental	Terrestrial	Soil	Unclassified	Unclassified	50.1318	11.881	166401	77785	2129	0
KBSK5251metaG_FD	Corn, switchgrass and miscanthus rhizosphere microbial communities from Kellogg Biological Station, Michigan, USA	Environmental	Terrestrial	Soil	Loam	Agricultural soil	42.3948	-85.3738	460027	105869	873	0
GWRWT3_2Sept14_FD	Groundwater microbial communities from the Columbia River, Washington, USA	Environmental	Terrestrial	Soil	Sand	Unclassified	46.372	-119.272	17007	4936	74	0
Wag42014_10_11_FD	Deep subsurface shale carbon reservoir microbial communities from Ohio and West Virginia, USA	Environmental	Terrestrial	Deep subsurface	Fracking water	Shale carbon reservoir	40.178	-81.073	4754	2022	82	0
OrgsoiDNA_201061_FD	Permafrost soil microbial communities from the Arctic, to analyse light accelerated degradation of dissolved organic matter (DOM)	Environmental	Terrestrial	Soil	Wetlands	Permafrost	68.6137	-149.314	92465	33168	894	0
LuqExpMetageno77_FD	Tropical forest soil microbial communities from Luquillo Experimental Forest, Puerto Rico	Environmental	Terrestrial	Soil	Loam	Forest soil	18	-65	34080	9562	176	0
NGESurdeep072012_10_FD	Arctic peat soil microbial communities from the Barrow Environmental Observatory site, Barrow, Alaska, USA	Environmental	Terrestrial	Soil	Unclassified	Permafrost	71.2999	-156.61	196010	72178	2488	1
III_Palsa_N2_3_FD	Peat permafrost microbial communities from Stordalen Mire near Abisko, Sweden	Environmental	Terrestrial	Soil	Peat	Permafrost	68.3535	19.0473	1989886	735905	23723	6
TexAe_OM2H0_O3_FD	Forest soil microbial communities from multiple locations in Canada and USA	Environmental	Terrestrial	Soil	Loam	Forest soil	31.11	-95.15	19933	2994	6	0
KBSC63BmetaG_FD	Corn, switchgrass and miscanthus rhizosphere microbial communities from Kellogg Biological Station, Michigan, USA	Environmental	Terrestrial	Soil	Loam	Agricultural soil	42.3948	-85.3738	1908285	587407	5817	0
Lox_Sample_45_FD	Soil microbial communities from Loxahatchee National Wildlife Refuge, Florida, United States	Environmental	Terrestrial	Soil	Wetlands	Unclassified	26.5052	-80.2345	2605561	849839	18528	3
UWRJL001104B6_FD	Soil microbial communities from Arlington Agricultural Research Station in Wisconsin and Kellogg Biological Station in Michigan, replicating the bioenergy cropping systems trials (BCSTs)	Environmental	Terrestrial	Plant litter	Unclassified	Unclassified	43.3	-89.38	183442	50387	2069	1
44E_DmetaG_FD	Soil microbial communities from hillslopes of Landscape Evolution Observatory, University of Arizona, Oracle, AZ, United States	Environmental	Terrestrial	Soil	Unclassified	Unclassified	32.5788	-110.851	36748	8147	62	0
NGEPertwo_FD	Arctic peat soil microbial communities from the Barrow Environmental Observatory site, Barrow, Alaska, USA	Environmental	Terrestrial	Soil	Unclassified	Permafrost	71.299	-156.61	107089	30146	1326	1
NGESurdeep072012_7_FD	Arctic peat soil microbial communities from the Barrow Environmental Observatory site, Barrow, Alaska, USA	Environmental	Terrestrial	Soil	Unclassified	Permafrost	71.2999	-156.61	108690	36857	134	0
Rivendell_Oct201_8_FD	Vadose zone soil and rhizosphere microbial communities from the Eel River Critical Zone Observatory, Northern California to study diel carbon cycling	Environmental	Terrestrial	Soil	Vadose zone	Saprolite	39.7291	-123.642	1240976	411711	5228	2
LuqExpMetageno56_FD	Tropical forest soil microbial communities from Luquillo Experimental Forest, Puerto Rico	Environmental	Terrestrial	Soil	Loam	Forest soil	18	-65	30520	8769	236	0
SoimicmetaGmgLPA_FD	Soil and rhizosphere microbial communities from Centre INRS-Institut Armand-Frappier, Laval, Canada	Environmental	Terrestrial	Soil	Unclassified	Unclassified	45.54	-73.72	15440	3331	1	0
AutmiccommunBRH9_FD	Deep subsurface microbial communities from Mt. Terri Underground Rock Laboratory, Switzerland, that are autotrophic	Environmental	Terrestrial	Deep subsurface	Clay	Unclassified	47.379	7.1648	62355	24437	1861	0
Wag42014_10_20_FD	Deep subsurface shale carbon reservoir microbial communities from Ohio and West Virginia, USA	Environmental	Terrestrial	Deep subsurface	Fracking water	Shale carbon reservoir	40.178	-81.073	7169	3540	450	0
BONt14_FD	Terrestrial sediment cell enrichment communities for BONCAT metagenomics from Utah, United States	Environmental	Terrestrial	Geologic	Sediment	Unclassified	38.715	-109.691	39586	9724	26	0
C0D2metaG_FD	Soil microbial communities from West Virginia University Organic Research Farm, Morgantown, WV, United States	Environmental	Terrestrial	Soil	Unclassified	Agricultural land	39.6475	-79.9369	609581	116770	307	0
MedBloCARef_M1_FD	Forest soil microbial communities from multiple locations in Canada and USA	Environmental	Terrestrial	Soil	Loam	Forest soil	38.88	-120.64	179228	56231	123	0
NitcycUWRG08A511_FD	Soil microbial communities from Arlington Agricultural Research Station in Wisconsin and Kellogg Biological Station in Michigan, replicating the bioenergy cropping systems trials (BCSTs)	Environmental	Terrestrial	Soil	Unclassified	Agricultural land	43.3	-89.38	5570	602	0	0
NitcycUWRG10A112_FD	Soil microbial communities from Arlington Agricultural Research Station in Wisconsin and Kellogg Biological Station in Michigan, replicating the bioenergy cropping systems trials (BCSTs)	Environmental	Terrestrial	Soil	Unclassified	Agricultural land	43.2958	-89.3799	4851	886	0	0
ER_DNA_151_FD	Soil microbial communities from the East River watershed near Crested Butte, Colorado, United States	Environmental	Terrestrial	Soil	Bulk soil	Meadow	38.9206	-106.949	432656	80883	475	0
SF_Rice_5C_0N_10_FD	Natural and restored wetland microbial communities from the San Francisco Bay, California, USA, that impact long-term carbon sequestration	Environmental	Terrestrial	Soil	Unclassified	Agricultural land	38.1087	-121.653	47914	10269	96	0
CNK29_metaG_FD	Soil microbial communities from Purdue University Martell Research Forest, Indiana, United States	Environmental	Terrestrial	Soil	Unclassified	Forest Soil	40.4449	-87.0297	101918	19197	539	0
BlaSpr_A8_Ref_M2_FD	Forest soil microbial communities from multiple locations in Canada and USA	Environmental	Terrestrial	Soil	Loam	Forest soil	49.08	-89.38	153435	39537	206	0
NitcycUWRG08A411_FD	Soil microbial communities from Arlington Agricultural Research Station in Wisconsin and Kellogg Biological Station in Michigan, replicating the bioenergy cropping systems trials (BCSTs)	Environmental	Terrestrial	Soil	Unclassified	Agricultural land	43.3	-89.38	10039	1682	0	0
I_Fen_E1_2_FD	Peat permafrost microbial communities from Stordalen Mire near Abisko, Sweden	Environmental	Terrestrial	Soil	Peat	Fen	68.3532	19.0469	177003	42759	386	0
MicForSoPHDC10_O_FD	Forest soil microbial communities from Harvard Forest Long Term Ecological Research (LTER) site in Petersham, MA, for long-term soil warming studies	Environmental	Terrestrial	Soil	Loam	Forest soil	42.5504	-72.1802	34989	6572	0	0
MicForSoiBWC17_M_FD	Forest soil microbial communities from Harvard Forest Long Term Ecological Research (LTER) site in Petersham, MA, for long-term soil warming studies	Environmental	Terrestrial	Soil	Loam	Forest soil	42.4711	-72.1726	8228	1225	0	0
LuqExpMetageno81_FD	Tropical forest soil microbial communities from Luquillo Experimental Forest, Puerto Rico	Environmental	Terrestrial	Soil	Loam	Forest soil	18	-65	267220	77563	742	0
NitcycUWRHINK08E_FD	Soil microbial communities from Arlington Agricultural Research Station in Wisconsin and Kellogg Biological Station in Michigan, replicating the bioenergy cropping systems trials (BCSTs)	Environmental	Terrestrial	Soil	Unclassified	Agricultural land	43.42	-89.4	2549	228	0	0
Sb_taG_5_FD	Peatlands soil microbial communities from Germany and Austria, that are sulfate reducing	Environmental	Terrestrial	Soil	Unclassified	Unclassified	50.1318	11.881	218882	81563	1521	0
MicForSoSWNC19_M_FD	Forest soil microbial communities from Harvard Forest Long Term Ecological Research (LTER) site in Petersham, MA, for long-term soil warming studies	Environmental	Terrestrial	Soil	Loam	Forest soil	42.533	-72.2095	15190	2134	0	0
BlaSpr_A8_Ref_O3_FD	Forest soil microbial communities from multiple locations in Canada and USA	Environmental	Terrestrial	Soil	Loam	Forest soil	49.08	-89.38	123730	33065	361	0
NitcycUWRG01A411_FD	Soil microbial communities from Arlington Agricultural Research Station in Wisconsin and Kellogg Biological Station in Michigan, replicating the bioenergy cropping systems trials (BCSTs)	Environmental	Terrestrial	Soil	Unclassified	Agricultural land	43.2958	-89.3799	4826	382	0	0
I_Fen_E3_4_FD	Peat permafrost microbial communities from Stordalen Mire near Abisko, Sweden	Environmental	Terrestrial	Soil	Peat	Fen	68.3532	19.0469	241415	57459	381	0
Coa_R2_FD	Surface soil microbial communities from Centralia Pennsylvania, which are recovering from an underground coalmine fire.	Environmental	Terrestrial	Soil	Unclassified	Unclassified	40.7999	-76.3402	284597	93123	5228	5
NitcycUWRG01A510_FD	Soil microbial communities from Arlington Agricultural Research Station in Wisconsin and Kellogg Biological Station in Michigan, replicating the bioenergy cropping systems trials (BCSTs)	Environmental	Terrestrial	Soil	Unclassified	Agricultural land	43.2958	-89.3799	32936	6526	3	0
OWC_Aug_M2_C1_D5_FD	Wetland microbial communities from Old Woman Creek delta, Ohio, USA	Environmental	Terrestrial	Soil	Wetlands	Unclassified	41.3769	-82.5097	4402745	1224580	5781	0
MayberryNE_Catta_FD	Natural and restored wetland microbial communities from the San Francisco Bay, California, USA, that impact long-term carbon sequestration	Environmental	Terrestrial	Soil	Wetlands	Unclassified	38.0525	-121.769	30303	7552	44	0
LuqExpMetageno26_FD	Tropical forest soil microbial communities from Luquillo Experimental Forest, Puerto Rico	Environmental	Terrestrial	Soil	Loam	Forest soil	18	-65	40974	12011	157	0
PerMet812E2M_FD	Thawing permafrost microbial communities from the Arctic, studying carbon transformations	Environmental	Terrestrial	Soil	Wetlands	Permafrost	68.3533	19.0466	84	4	0	0
SoimicmetaGmgHMB_FD	Soil and rhizosphere microbial communities from Centre INRS-Institut Armand-Frappier, Laval, Canada	Environmental	Terrestrial	Soil	Unclassified	Unclassified	45.54	-73.72	60762	11945	104	0
III_Fen_N1_1_FD	Peat permafrost microbial communities from Stordalen Mire near Abisko, Sweden	Environmental	Terrestrial	Soil	Peat	Fen	68.3532	19.0469	249716	89378	2790	0
II_Palsa_E3_2_FD	Peat permafrost microbial communities from Stordalen Mire near Abisko, Sweden	Environmental	Terrestrial	Soil	Peat	Permafrost	68.3535	19.0473	622483	186539	2892	2
NGEPerA_FD	Arctic peat soil microbial communities from the Barrow Environmental Observatory site, Barrow, Alaska, USA	Environmental	Terrestrial	Soil	Unclassified	Permafrost	71.299	-156.61	392587	133919	3669	0
NitcycUWRG05A310_FD	Soil microbial communities from Arlington Agricultural Research Station in Wisconsin and Kellogg Biological Station in Michigan, replicating the bioenergy cropping systems trials (BCSTs)	Environmental	Terrestrial	Soil	Unclassified	Agricultural land	43.3	-89.38	2621	79	0	0
GraSoiAngelo_103_FD	Grasslands soil microbial communities from the Angelo Coastal Reserve, California, USA	Environmental	Terrestrial	Soil	Unclassified	Grasslands	39.7392	-123.631	244238	73490	636	0
SF_Rice_10C_80N__FD	Natural and restored wetland microbial communities from the San Francisco Bay, California, USA, that impact long-term carbon sequestration	Environmental	Terrestrial	Soil	Unclassified	Agricultural land	38.1087	-121.653	45829	8749	4	0
OKSTACKMC2E_FD	Subsurface microbial communities from deep shales in Ohio and West Virginia, USA	Environmental	Terrestrial	Geologic	Sediment	Unclassified	35.7	-98.594	82063	19002	418	1
GRESIP178b2f16_FD	Lab enrichment of tropical soil microbial communities from Luquillo Experimental Forest, Puerto Rico	Environmental	Terrestrial	Soil	Unclassified	Forest Soil	18.321	-65.8172	1118514	280922	789	0
713E3SmetaG_FD	Peatland microbial communities from Stordalen Mire, Sweden	Environmental	Terrestrial	Soil	Peat	Mire	68.3533	19.0467	130465	35454	391	0
GWRWS1_30_40_FD	Groundwater microbial communities from the Columbia River, Washington, USA	Environmental	Terrestrial	Soil	Sand	Unclassified	46.372	-119.272	179328	62935	621	0
SubbioCSW11_NovA_FD	Serpentinite rock and fluid microbial communities from Tablelands Ophiolite (Newfoundland), Coast Range Ophiolite (California) and Ligurian Springs (Italy)	Environmental	Terrestrial	Deep subsurface	Unclassified	Unclassified	38.874	-122.439	3775	1700	190	0
RifCSP16_2_FD	Soil microbial communities from Rifle, Colorado, USA	Environmental	Terrestrial	Soil	Loam	Unclassified	39.53	-107.78	1397627	508923	9014	18
Sb_taG_3_FD	Peatlands soil microbial communities from Germany and Austria, that are sulfate reducing	Environmental	Terrestrial	Soil	Unclassified	Unclassified	50.1318	11.881	443818	150269	4167	0
ER_DNA_157_FD	Soil microbial communities from the East River watershed near Crested Butte, Colorado, United States	Environmental	Terrestrial	Soil	Bulk soil	Meadow	38.9206	-106.949	413772	89668	444	0
PanSoiPlo30MoBio_FD	Tropical forest soil microbial communities from Panama analyzed to predict greenhouse gas emissions	Environmental	Terrestrial	Soil	Loam	Forest soil	9.1086	-79.8436	136495	36654	356	0
714P21014metaG_FD	Peatland microbial communities from Stordalen Mire, Sweden	Environmental	Terrestrial	Soil	Peat	Mire	68.3534	19.0472	59252	14501	202	0
JacPin_JW_Ref_O1_FD	Forest soil microbial communities from multiple locations in Canada and USA	Environmental	Terrestrial	Soil	Loam	Forest soil	46.42	-83.37	165774	51794	393	0
MicForSoiBWC30_O_FD	Forest soil microbial communities from Harvard Forest Long Term Ecological Research (LTER) site in Petersham, MA, for long-term soil warming studies	Environmental	Terrestrial	Soil	Loam	Forest soil	42.4711	-72.1726	2778	599	0	0
RVTome_14_FD	Soil microbial communities from uranium-contaminated sites across the Upper Colorado River Basin region	Environmental	Terrestrial	Soil	Unclassified	Unclassified	42.9888	-108.399	1388256	443788	5837	3
NitcycUWG06A3a12_FD	Soil microbial communities from Arlington Agricultural Research Station in Wisconsin and Kellogg Biological Station in Michigan, replicating the bioenergy cropping systems trials (BCSTs)	Environmental	Terrestrial	Soil	Unclassified	Agricultural land	43.3	-89.38	7272	956	1	0
SubbioR11_8A_Aug_FD	Serpentinite rock and fluid microbial communities from Tablelands Ophiolite (Newfoundland), Coast Range Ophiolite (California) and Ligurian Springs (Italy)	Environmental	Terrestrial	Deep subsurface	Unclassified	Unclassified	38.874	-122.439	21566	9568	883	0
SF_Rice_20C_80N__4_FD	Natural and restored wetland microbial communities from the San Francisco Bay, California, USA, that impact long-term carbon sequestration	Environmental	Terrestrial	Soil	Unclassified	Agricultural land	38.1087	-121.653	36750	7675	16	0
LuqExpMetagenom4_FD	Tropical forest soil microbial communities from Luquillo Experimental Forest, Puerto Rico	Environmental	Terrestrial	Soil	Loam	Forest soil	18	-65	50345	14353	172	0
EtOH1_T0_E1_meta_FD	Methane metabolizing microbial communities from different methane-rich environments from various locations	Environmental	Terrestrial	Soil	Sand	Unclassified	49.2598	-123.246	253849	59980	401	0
BONt11_FD	Terrestrial sediment cell enrichment communities for BONCAT metagenomics from Utah, United States	Environmental	Terrestrial	Geologic	Sediment	Unclassified	38.715	-109.691	35180	3845	3	0
GraSoi_2013_40cm_FD	Grasslands soil microbial communities from the Angelo Coastal Reserve, California, USA	Environmental	Terrestrial	Soil	Unclassified	Grasslands	39.7392	-123.631	424757	184506	3795	1
MicForSoilBWH4_M_FD	Forest soil microbial communities from Harvard Forest Long Term Ecological Research (LTER) site in Petersham, MA, for long-term soil warming studies	Environmental	Terrestrial	Soil	Loam	Forest soil	42.533	-72.2095	12254	1687	0	0
NitcycUWRG05A112_FD	Soil microbial communities from Arlington Agricultural Research Station in Wisconsin and Kellogg Biological Station in Michigan, replicating the bioenergy cropping systems trials (BCSTs)	Environmental	Terrestrial	Soil	Unclassified	Agricultural land	43.3	-89.38	8290	1995	3	0
NitcycUWRG01A512_FD	Soil microbial communities from Arlington Agricultural Research Station in Wisconsin and Kellogg Biological Station in Michigan, replicating the bioenergy cropping systems trials (BCSTs)	Environmental	Terrestrial	Soil	Unclassified	Agricultural land	43.2958	-89.3799	3773	252	0	0
ER_DNA_159_FD	Soil microbial communities from the East River watershed near Crested Butte, Colorado, United States	Environmental	Terrestrial	Soil	Bulk soil	Meadow	38.9206	-106.949	422439	116923	888	0
CNK03_metaG_FD	Soil microbial communities from Purdue University Martell Research Forest, Indiana, United States	Environmental	Terrestrial	Soil	Unclassified	Forest Soil	40.4449	-87.0297	113232	24987	84	0
MayberryNE_TuleB_2_FD	Natural and restored wetland microbial communities from the San Francisco Bay, California, USA, that impact long-term carbon sequestration	Environmental	Terrestrial	Soil	Wetlands	Unclassified	38.0525	-121.769	19489	3859	7	0
LinTernordMG_FD	Rock endolithic microbial communities from Victoria Land, Antarctica	Environmental	Terrestrial	Rock-dwelling (endoliths)	Unclassified	Unclassified	-77.6	161.1	205165	124958	11548	14
NGESurshal092012_3_FD	Arctic peat soil microbial communities from the Barrow Environmental Observatory site, Barrow, Alaska, USA	Environmental	Terrestrial	Soil	Unclassified	Permafrost	71.2999	-156.61	102655	31411	775	0
LuqExpMetagenom6_FD	Tropical forest soil microbial communities from Luquillo Experimental Forest, Puerto Rico	Environmental	Terrestrial	Soil	Loam	Forest soil	18	-65	53410	21058	365	0
LuqExpMetageno43_FD	Tropical forest soil microbial communities from Luquillo Experimental Forest, Puerto Rico	Environmental	Terrestrial	Soil	Loam	Forest soil	18	-65	19048	6089	63	0
ForSoiNitrogNN94_FD	Soil microbial communities from 10 grassland sites in CA, CO, KS, KY, MN, MO, NM, SC, TX, that have been nitrogen fertilized	Environmental	Terrestrial	Soil	Loam	Forest soil	39.2355	-121.284	2073	174	0	0
MicForSoiPHH15_O_FD	Forest soil microbial communities from Harvard Forest Long Term Ecological Research (LTER) site in Petersham, MA, for long-term soil warming studies	Environmental	Terrestrial	Soil	Loam	Forest soil	42.5504	-72.1802	68201	17177	36	0
Shrwel1BS1Day23_FD	Subsurface microbial communities from deep shales in Ohio and West Virginia, USA	Environmental	Terrestrial	Deep subsurface	Unclassified	Unclassified	39.849	-81.036	4102	1431	150	0
SF_Rice_25C_0N_4_FD	Natural and restored wetland microbial communities from the San Francisco Bay, California, USA, that impact long-term carbon sequestration	Environmental	Terrestrial	Soil	Unclassified	Agricultural land	38.1087	-121.653	7066	716	0	0
MeOH1_35cm_T3_17_FD	Methane metabolizing microbial communities from different methane-rich environments from various locations	Environmental	Terrestrial	Soil	Sand	Unclassified	49.2598	-123.246	33867	17134	2301	0
UWRJL058202B2_FD	Soil microbial communities from Arlington Agricultural Research Station in Wisconsin and Kellogg Biological Station in Michigan, replicating the bioenergy cropping systems trials (BCSTs)	Environmental	Terrestrial	Plant litter	Unclassified	Unclassified	43.3	-89.38	378880	116134	1041	0
9_S_MG_FD	Soil and ectomycorrhiza microbial communities from Populus trichocarpa stands in riparian zones in the Pacific Northwest, United States	Environmental	Terrestrial	Soil	Unclassified	Riparian soil	45.0822	-123.061	147718	17607	13	0
NitcycUWRG09A310_FD	Soil microbial communities from Arlington Agricultural Research Station in Wisconsin and Kellogg Biological Station in Michigan, replicating the bioenergy cropping systems trials (BCSTs)	Environmental	Terrestrial	Soil	Unclassified	Agricultural land	43.3	-89.38	3160	178	0	0
ForSoiNitroNN332_FD	Soil microbial communities from 10 grassland sites in CA, CO, KS, KY, MN, MO, NM, SC, TX, that have been nitrogen fertilized	Environmental	Terrestrial	Soil	Loam	Grasslands	35.913	-79.056	589	51	0	0
JacPin_JW_Ref_M2_FD	Forest soil microbial communities from multiple locations in Canada and USA	Environmental	Terrestrial	Soil	Loam	Forest soil	46.42	-83.37	161276	43753	514	0
NitcycUWRSCHO22D_FD	Soil microbial communities from Arlington Agricultural Research Station in Wisconsin and Kellogg Biological Station in Michigan, replicating the bioenergy cropping systems trials (BCSTs)	Environmental	Terrestrial	Soil	Unclassified	Agricultural land	43.3	-89.38	7103	1768	1	0
NitcycUWRG10A412_FD	Soil microbial communities from Arlington Agricultural Research Station in Wisconsin and Kellogg Biological Station in Michigan, replicating the bioenergy cropping systems trials (BCSTs)	Environmental	Terrestrial	Soil	Unclassified	Agricultural land	43.2958	-89.3799	3137	182	0	0
JacPinW_OM2H0_M1_FD	Forest soil microbial communities from multiple locations in Canada and USA	Environmental	Terrestrial	Soil	Loam	Forest soil	46.42	-83.37	1000860	344603	4033	0
SubbioAug_CSWold_FD	Serpentinite rock and fluid microbial communities from Tablelands Ophiolite (Newfoundland), Coast Range Ophiolite (California) and Ligurian Springs (Italy)	Environmental	Terrestrial	Deep subsurface	Unclassified	Unclassified	38.874	-122.439	30247	15978	1261	0
Coa_R1_3_FD	Surface soil microbial communities from Centralia Pennsylvania, which are recovering from an underground coalmine fire.	Environmental	Terrestrial	Soil	Unclassified	Unclassified	40.7999	-76.3402	723773	225899	4308	4
GRESIP108b1f24_FD	Lab enrichment of tropical soil microbial communities from Luquillo Experimental Forest, Puerto Rico	Environmental	Terrestrial	Soil	Unclassified	Forest Soil	18.321	-65.8172	969098	258551	1267	0
GWRWN1_20_30_FD	Groundwater microbial communities from the Columbia River, Washington, USA	Environmental	Terrestrial	Soil	Sand	Unclassified	46.372	-119.272	161379	56956	699	0
CNK17_metaG_FD	Soil microbial communities from Purdue University Martell Research Forest, Indiana, United States	Environmental	Terrestrial	Soil	Unclassified	Forest Soil	40.4449	-87.0297	94363	22444	155	0
LuqExpMetageno27_FD	Tropical forest soil microbial communities from Luquillo Experimental Forest, Puerto Rico	Environmental	Terrestrial	Soil	Loam	Forest soil	18	-65	20580	6109	120	0
GAAS200_FD	Agricultural soil microbial communities from Utah and Georgia to study Nitrogen management	Environmental	Terrestrial	Soil	Unclassified	Agricultural land	33.8834	-83.4195	334400	93264	720	0
GWRWS2_10_20_FD	Groundwater microbial communities from the Columbia River, Washington, USA	Environmental	Terrestrial	Soil	Sand	Unclassified	46.372	-119.272	23930	4558	17	0
LARL83metaG_FD	Corn, switchgrass and miscanthus rhizosphere microbial communities from Kellogg Biological Station, Michigan, USA	Environmental	Terrestrial	Soil	Loam	Agricultural soil	42.4774	-85.451	2020296	587945	3920	0
BarGraIncub1133A_FD	Arctic peat soil microbial communities from the Barrow Environmental Observatory site, Barrow, Alaska, USA	Environmental	Terrestrial	Soil	Unclassified	Permafrost	71.2909	-156.788	146330	62067	3077	0
PudButnordMG_FD	Rock endolithic microbial communities from Victoria Land, Antarctica	Environmental	Terrestrial	Rock-dwelling (endoliths)	Unclassified	Unclassified	-75.8	159.9	307681	160342	13789	16
GWRWT3_30Apr14_FD	Groundwater microbial communities from the Columbia River, Washington, USA	Environmental	Terrestrial	Soil	Sand	Unclassified	46.372	-119.272	44576	14832	24	3
Sb_taG_7_FD	Peatlands soil microbial communities from Germany and Austria, that are sulfate reducing	Environmental	Terrestrial	Soil	Unclassified	Unclassified	50.1318	11.881	245839	80544	2420	0
LuqExpMetageno13_FD	Tropical forest soil microbial communities from Luquillo Experimental Forest, Puerto Rico	Environmental	Terrestrial	Soil	Loam	Forest soil	18	-65	39261	11534	139	0
ForSoiNitrNN1120_FD	Soil microbial communities from 10 grassland sites in CA, CO, KS, KY, MN, MO, NM, SC, TX, that have been nitrogen fertilized	Environmental	Terrestrial	Soil	Loam	Grasslands	40.8167	-104.767	1044	127	0	0
JacPinW_OM1H0_M2_FD	Forest soil microbial communities from multiple locations in Canada and USA	Environmental	Terrestrial	Soil	Loam	Forest soil	46.42	-83.37	222902	55043	346	0
NCAS200_FD	Agricultural soil microbial communities from Utah and Georgia to study Nitrogen management	Environmental	Terrestrial	Soil	Unclassified	Agricultural land	41.7655	-111.814	265890	51317	390	0
MC6MC0900MG_FD	Enriched soil aggregate microbial communities from Iowa State university to study microbial drivers of carbon cycling	Environmental	Terrestrial	Soil	Unclassified	Unclassified	42	-93	119168	50931	3173	0
WisWelCaveWW1625_FD	Subsurface microbial communities from deep shales in Ohio and West Virginia, USA	Environmental	Terrestrial	Cave	Unclassified	Unclassified	38.1667	-79.633	1231067	462519	20756	18
MicForSoiPHH12_M_FD	Forest soil microbial communities from Harvard Forest Long Term Ecological Research (LTER) site in Petersham, MA, for long-term soil warming studies	Environmental	Terrestrial	Soil	Loam	Forest soil	42.5504	-72.1802	31356	5331	0	0
NitcycUWRSCHO21B_FD	Soil microbial communities from Arlington Agricultural Research Station in Wisconsin and Kellogg Biological Station in Michigan, replicating the bioenergy cropping systems trials (BCSTs)	Environmental	Terrestrial	Soil	Unclassified	Agricultural land	43.3	-89.38	10214	1686	0	0
III_Fen_N2_1_FD	Peat permafrost microbial communities from Stordalen Mire near Abisko, Sweden	Environmental	Terrestrial	Soil	Peat	Fen	68.3532	19.0469	301576	105519	2894	2
NitcycUWRROWE17E_FD	Soil microbial communities from Arlington Agricultural Research Station in Wisconsin and Kellogg Biological Station in Michigan, replicating the bioenergy cropping systems trials (BCSTs)	Environmental	Terrestrial	Soil	Unclassified	Agricultural land	43.42	-89.32	7529	894	0	0
TexAe_OM1H0_M1_FD	Forest soil microbial communities from multiple locations in Canada and USA	Environmental	Terrestrial	Soil	Loam	Forest soil	31.11	-95.15	51507	11423	0	0
GRESIP053b4f23_FD	Lab enrichment of tropical soil microbial communities from Luquillo Experimental Forest, Puerto Rico	Environmental	Terrestrial	Soil	Unclassified	Forest Soil	18.321	-65.8172	625411	172506	507	0
SoimicmetaGmgLMB_FD	Soil and rhizosphere microbial communities from Centre INRS-Institut Armand-Frappier, Laval, Canada	Environmental	Terrestrial	Soil	Unclassified	Unclassified	45.54	-73.72	5718	535	0	0
LuqExpMetageno75_FD	Tropical forest soil microbial communities from Luquillo Experimental Forest, Puerto Rico	Environmental	Terrestrial	Soil	Loam	Forest soil	18	-65	24147	7478	147	0
Shrwel1BS1Day9_FD	Subsurface microbial communities from deep shales in Ohio and West Virginia, USA	Environmental	Terrestrial	Deep subsurface	Unclassified	Unclassified	39.849	-81.036	11270	5430	388	0
17_S_MG_FD	Soil and ectomycorrhiza microbial communities from Populus trichocarpa stands in riparian zones in the Pacific Northwest, United States	Environmental	Terrestrial	Soil	Unclassified	Riparian soil	46.6992	-120.899	954807	173289	345	0
NitcycUWRG01A212_FD	Soil microbial communities from Arlington Agricultural Research Station in Wisconsin and Kellogg Biological Station in Michigan, replicating the bioenergy cropping systems trials (BCSTs)	Environmental	Terrestrial	Soil	Unclassified	Agricultural land	43.2958	-89.3799	6984	861	0	0
714P32024metaG_FD	Peatland microbial communities from Stordalen Mire, Sweden	Environmental	Terrestrial	Soil	Peat	Mire	68.3535	19.0472	105304	26134	108	0
LuqExpMetageno62_FD	Tropical forest soil microbial communities from Luquillo Experimental Forest, Puerto Rico	Environmental	Terrestrial	Soil	Loam	Forest soil	18	-65	9811	3206	39	0
Sb_taG_11_FD	Peatlands soil microbial communities from Germany and Austria, that are sulfate reducing	Environmental	Terrestrial	Soil	Unclassified	Unclassified	50.1318	11.881	489843	164688	2272	1
LuqExpMetageno68_FD	Tropical forest soil microbial communities from Luquillo Experimental Forest, Puerto Rico	Environmental	Terrestrial	Soil	Loam	Forest soil	18	-65	44134	12206	314	0
ForSoiNitroNN611_FD	Soil microbial communities from 10 grassland sites in CA, CO, KS, KY, MN, MO, NM, SC, TX, that have been nitrogen fertilized	Environmental	Terrestrial	Soil	Loam	Grasslands	39.05	-99.1	1833	194	0	0
RVTome_15_FD	Soil microbial communities from uranium-contaminated sites across the Upper Colorado River Basin region	Environmental	Terrestrial	Soil	Unclassified	Unclassified	42.9888	-108.399	1043802	379507	4805	0
NitcycUWG06A5a10_FD	Soil microbial communities from Arlington Agricultural Research Station in Wisconsin and Kellogg Biological Station in Michigan, replicating the bioenergy cropping systems trials (BCSTs)	Environmental	Terrestrial	Soil	Unclassified	Agricultural land	43.3	-89.38	4455	174	0	0
GEONSFMMS_FD	Soil and plant litter microbial communities from temperate forests in California, United States	Environmental	Terrestrial	Soil	Unclassified	Forest Soil	40.282	-123.287	55011	10638	125	0
714S259metaG_FD	Peatland microbial communities from Stordalen Mire, Sweden	Environmental	Terrestrial	Soil	Peat	Mire	68.3532	19.0471	204582	71187	2151	0
MC6MC0909MG_FD	Enriched soil aggregate microbial communities from Iowa State university to study microbial drivers of carbon cycling	Environmental	Terrestrial	Soil	Unclassified	Unclassified	42	-93	89995	37393	1631	0
LARL81metaG_FD	Corn, switchgrass and miscanthus rhizosphere microbial communities from Kellogg Biological Station, Michigan, USA	Environmental	Terrestrial	Soil	Loam	Agricultural soil	42.4774	-85.451	1489360	455460	6076	1
BlaSpr_A8_OM2_O1_FD	Forest soil microbial communities from multiple locations in Canada and USA	Environmental	Terrestrial	Soil	Loam	Forest soil	49.08	-89.38	153520	40221	421	0
GFST50metaG_FD	Peatland microbial communities from Stordalen Mire, Sweden	Environmental	Terrestrial	Soil	Peat	Mire	68.3533	19.0466	35118	10730	362	0
UWRJS019104C5_FD	Soil microbial communities from Arlington Agricultural Research Station in Wisconsin and Kellogg Biological Station in Michigan, replicating the bioenergy cropping systems trials (BCSTs)	Environmental	Terrestrial	Soil	Unclassified	Agricultural land	43.3	-89.38	100559	17708	54	0
CBST25v5metaG_FD	Peatland microbial communities from Stordalen Mire, Sweden	Environmental	Terrestrial	Soil	Peat	Mire	68.3529	19.0475	94062	32537	896	0
ForSoiNitroNN619_FD	Soil microbial communities from 10 grassland sites in CA, CO, KS, KY, MN, MO, NM, SC, TX, that have been nitrogen fertilized	Environmental	Terrestrial	Soil	Loam	Grasslands	39.05	-99.1	502	39	0	0
PanSoiPlo36MoBio_FD	Tropical forest soil microbial communities from Panama analyzed to predict greenhouse gas emissions	Environmental	Terrestrial	Soil	Loam	Forest soil	9.1086	-79.8436	167809	43680	235	0
II_Palsa_N2_1_FD	Peat permafrost microbial communities from Stordalen Mire near Abisko, Sweden	Environmental	Terrestrial	Soil	Peat	Permafrost	68.3535	19.0473	458619	128684	2850	4
GREbulkMGOX082_FD	Lab enrichment of tropical soil microbial communities from Luquillo Experimental Forest, Puerto Rico	Environmental	Terrestrial	Soil	Unclassified	Forest Soil	18.321	-65.8172	1322270	381249	2409	1
GRESIP065b5f23_FD	Lab enrichment of tropical soil microbial communities from Luquillo Experimental Forest, Puerto Rico	Environmental	Terrestrial	Soil	Unclassified	Forest Soil	18.321	-65.8172	856959	234225	900	0
RifCSP19_1_FD	Soil microbial communities from Rifle, Colorado, USA	Environmental	Terrestrial	Soil	Unclassified	Unclassified	39.53	-107.78	211578	70919	935	0
UWRJS223509R6_FD	Soil microbial communities from Arlington Agricultural Research Station in Wisconsin and Kellogg Biological Station in Michigan, replicating the bioenergy cropping systems trials (BCSTs)	Environmental	Terrestrial	Soil	Unclassified	Agricultural land	43.3	-89.38	104618	18360	242	0
I_Bog_E1_2_FD	Peat permafrost microbial communities from Stordalen Mire near Abisko, Sweden	Environmental	Terrestrial	Soil	Peat	Bog	68.3532	19.0477	234254	63416	637	0
PeaSoiSIISIP2007_FD	Peatlands soil microbial communities from Germany and Austria, that are sulfate reducing	Environmental	Terrestrial	Soil	Peat	Unclassified	50.13	11.88	1151531	458812	21294	1
atmos_gasesAM5C__2_FD	Hardwood forest soil microbial communities from various locations in the United States	Environmental	Terrestrial	Soil	Unclassified	Forest Soil	39.0844	-86.4705	2792636	560410	1267	2
GraSoi013_1_20cm_3_FD	Grasslands soil microbial communities from the Angelo Coastal Reserve, California, USA	Environmental	Terrestrial	Soil	Unclassified	Grasslands	39.7383	-123.63	321798	105981	1107	0
SF_Rice_20C_80N__3_FD	Natural and restored wetland microbial communities from the San Francisco Bay, California, USA, that impact long-term carbon sequestration	Environmental	Terrestrial	Soil	Unclassified	Agricultural land	38.1087	-121.653	23710	5049	0	0
ForSoiNitroNN607_FD	Soil microbial communities from 10 grassland sites in CA, CO, KS, KY, MN, MO, NM, SC, TX, that have been nitrogen fertilized	Environmental	Terrestrial	Soil	Loam	Grasslands	39.05	-99.1	8193	2178	0	0
PhyCR1_3_FD	Leaf surface microbial communities from various plants in UC Gill Tract Community Farm, Albany, California, United States	Environmental	Terrestrial	Soil	Unclassified	Agricultural land	37.8864	-122.298	3300994	852784	4297	0
Rifsed13ft4_FD	Soil microbial communities from Rifle, Colorado, USA	Environmental	Terrestrial	Soil	Unclassified	Unclassified	39.53	-107.78	459631	159726	2154	0
OWC_Aug_OW2_C1_D_2_FD	Wetland microbial communities from Old Woman Creek delta, Ohio, USA	Environmental	Terrestrial	Soil	Wetlands	Unclassified	41.3778	-82.5111	1620135	342027	277	0
TexAe_OM3H0_M1_FD	Forest soil microbial communities from multiple locations in Canada and USA	Environmental	Terrestrial	Soil	Loam	Forest soil	31.11	-95.15	139165	36076	14	0
NitcycUWRG01K112_FD	Soil microbial communities from Arlington Agricultural Research Station in Wisconsin and Kellogg Biological Station in Michigan, replicating the bioenergy cropping systems trials (BCSTs)	Environmental	Terrestrial	Soil	Unclassified	Agricultural land	43.3	-89.38	6317	636	1	0
WestPond_TuleC_D_FD	Natural and restored wetland microbial communities from the San Francisco Bay, California, USA, that impact long-term carbon sequestration	Environmental	Terrestrial	Soil	Wetlands	Unclassified	38.1075	-121.65	14985	1876	5	0
JacPinW_OM3H0_M2_FD	Forest soil microbial communities from multiple locations in Canada and USA	Environmental	Terrestrial	Soil	Loam	Forest soil	46.42	-83.37	223401	73690	672	0
LuqExpMetageno39_FD	Tropical forest soil microbial communities from Luquillo Experimental Forest, Puerto Rico	Environmental	Terrestrial	Soil	Loam	Forest soil	18	-65	36274	11904	183	0
RifOxyC2_FD	Soil microbial communities from Rifle, Colorado, USA	Environmental	Terrestrial	Soil	Loam	Unclassified	39.5348	-107.783	344684	133044	5884	1
II_Bog_N2_3_FD	Peat permafrost microbial communities from Stordalen Mire near Abisko, Sweden	Environmental	Terrestrial	Soil	Peat	Bog	68.3532	19.0477	279125	90424	2015	5
NI49A_FD	Soil microbial communities from H.J. Andrews Experimental Forest, Oregon, United States	Environmental	Terrestrial	Soil	Unclassified	Forest Soil	44.23	-122.22	142482	36553	165	0
NitcycUWRG05A512_FD	Soil microbial communities from Arlington Agricultural Research Station in Wisconsin and Kellogg Biological Station in Michigan, replicating the bioenergy cropping systems trials (BCSTs)	Environmental	Terrestrial	Soil	Unclassified	Agricultural land	43.3	-89.38	21256	4026	74	0
RushMan_ThreeSqB_FD	Natural and restored wetland microbial communities from the San Francisco Bay, California, USA, that impact long-term carbon sequestration	Environmental	Terrestrial	Soil	Wetlands	Unclassified	38.2098	-122.033	12838	1417	2	0
NitcycUWG052A511_FD	Soil microbial communities from Arlington Agricultural Research Station in Wisconsin and Kellogg Biological Station in Michigan, replicating the bioenergy cropping systems trials (BCSTs)	Environmental	Terrestrial	Soil	Unclassified	Agricultural land	43.3	-89.38	6365	671	0	0
ForSoiNitroNN589_FD	Soil microbial communities from 10 grassland sites in CA, CO, KS, KY, MN, MO, NM, SC, TX, that have been nitrogen fertilized	Environmental	Terrestrial	Soil	Loam	Grasslands	39.0709	-96.5828	1319	106	0	0
GraSoiAngelo_146_FD	Grasslands soil microbial communities from the Angelo Coastal Reserve, California, USA	Environmental	Terrestrial	Soil	Unclassified	Grasslands	39.7392	-123.631	255049	118618	4439	0
NitcycUWRHINK07A_FD	Soil microbial communities from Arlington Agricultural Research Station in Wisconsin and Kellogg Biological Station in Michigan, replicating the bioenergy cropping systems trials (BCSTs)	Environmental	Terrestrial	Soil	Unclassified	Agricultural land	43.43	-89.41	4774	233	0	0
SF_Rice_10C_0N_1_FD	Natural and restored wetland microbial communities from the San Francisco Bay, California, USA, that impact long-term carbon sequestration	Environmental	Terrestrial	Soil	Unclassified	Agricultural land	38.1087	-121.653	33513	5857	0	0
IRFST25metaG_FD	Peatland microbial communities from Stordalen Mire, Sweden	Environmental	Terrestrial	Soil	Peat	Mire	68.3533	19.0466	64076	19680	253	0
GWRWT3_25Nov14_FD	Groundwater microbial communities from the Columbia River, Washington, USA	Environmental	Terrestrial	Soil	Sand	Unclassified	46.372	-119.272	14650	4589	108	0
I_Bog_E3_1_FD	Peat permafrost microbial communities from Stordalen Mire near Abisko, Sweden	Environmental	Terrestrial	Soil	Peat	Bog	68.3532	19.0477	434856	135058	2622	0
NitcycUWG10A5w11_FD	Soil microbial communities from Arlington Agricultural Research Station in Wisconsin and Kellogg Biological Station in Michigan, replicating the bioenergy cropping systems trials (BCSTs)	Environmental	Terrestrial	Soil	Unclassified	Agricultural land	43.3	-89.38	6358	682	0	0
JacPinW_OM1H0_M3_FD	Forest soil microbial communities from multiple locations in Canada and USA	Environmental	Terrestrial	Soil	Loam	Forest soil	46.42	-83.37	131509	31531	9	0
SF_Rice_5C_80N_2_FD	Natural and restored wetland microbial communities from the San Francisco Bay, California, USA, that impact long-term carbon sequestration	Environmental	Terrestrial	Soil	Unclassified	Agricultural land	38.1087	-121.653	31902	5145	0	0
LuqExpMetageno49_FD	Tropical forest soil microbial communities from Luquillo Experimental Forest, Puerto Rico	Environmental	Terrestrial	Soil	Loam	Forest soil	18	-65	32648	10358	150	0
NGESurF53shallow_FD	Arctic peat soil microbial communities from the Barrow Environmental Observatory site, Barrow, Alaska, USA	Environmental	Terrestrial	Soil	Unclassified	Permafrost	71.2999	-156.61	150698	49601	878	1
LuqExpMetageno24_FD	Tropical forest soil microbial communities from Luquillo Experimental Forest, Puerto Rico	Environmental	Terrestrial	Soil	Loam	Forest soil	18	-65	23015	6496	99	0
SubbioR11_8A_Apr_FD	Serpentinite rock and fluid microbial communities from Tablelands Ophiolite (Newfoundland), Coast Range Ophiolite (California) and Ligurian Springs (Italy)	Environmental	Terrestrial	Deep subsurface	Unclassified	Unclassified	38.874	-122.439	22983	9878	852	0
Wag4_2014_7_11_FD	Deep subsurface shale carbon reservoir microbial communities from Ohio and West Virginia, USA	Environmental	Terrestrial	Deep subsurface	Fracking water	Shale carbon reservoir	40.178	-81.073	159207	62189	1532	13
NitcycUWRG08K112_FD	Soil microbial communities from Arlington Agricultural Research Station in Wisconsin and Kellogg Biological Station in Michigan, replicating the bioenergy cropping systems trials (BCSTs)	Environmental	Terrestrial	Soil	Unclassified	Agricultural land	43.3	-89.38	4275	874	0	0
Wag4S2014_12_3_FD	Deep subsurface shale carbon reservoir microbial communities from Ohio and West Virginia, USA	Environmental	Terrestrial	Deep subsurface	Fracking water	Shale carbon reservoir	40.178	-81.073	1276	916	221	0
LuqExpMetageno74_FD	Tropical forest soil microbial communities from Luquillo Experimental Forest, Puerto Rico	Environmental	Terrestrial	Soil	Loam	Forest soil	18	-65	27166	7844	158	0
GraSoi013_1_40cm_4_FD	Grasslands soil microbial communities from the Angelo Coastal Reserve, California, USA	Environmental	Terrestrial	Soil	Unclassified	Grasslands	39.7182	-123.653	351267	171208	3791	0
LuqExpMetageno79_FD	Tropical forest soil microbial communities from Luquillo Experimental Forest, Puerto Rico	Environmental	Terrestrial	Soil	Loam	Forest soil	18	-65	27727	7950	175	0
NitcycUWG06A4a12_FD	Soil microbial communities from Arlington Agricultural Research Station in Wisconsin and Kellogg Biological Station in Michigan, replicating the bioenergy cropping systems trials (BCSTs)	Environmental	Terrestrial	Soil	Unclassified	Agricultural land	43.3	-89.38	5698	590	0	0
GFST25metaG_FD	Peatland microbial communities from Stordalen Mire, Sweden	Environmental	Terrestrial	Soil	Peat	Mire	68.3533	19.0466	28022	9543	381	0
GRESIP178b2f17_FD	Lab enrichment of tropical soil microbial communities from Luquillo Experimental Forest, Puerto Rico	Environmental	Terrestrial	Soil	Unclassified	Forest Soil	18.321	-65.8172	1053154	268454	716	0
EasRivMeERMLT700_FD	Soil and sediment microbial communities from the East River, CO, USA	Environmental	Terrestrial	Soil	Floodplain	Unclassified	38.9232	-106.952	169054	50820	886	2
NitcycUWRG01K512_FD	Soil microbial communities from Arlington Agricultural Research Station in Wisconsin and Kellogg Biological Station in Michigan, replicating the bioenergy cropping systems trials (BCSTs)	Environmental	Terrestrial	Soil	Unclassified	Agricultural land	43.3	-89.38	2966	175	0	0
GFST0metaG_FD	Peatland microbial communities from Stordalen Mire, Sweden	Environmental	Terrestrial	Soil	Peat	Mire	68.3533	19.0466	70852	17135	63	0
LuqExpMetageno11_FD	Tropical forest soil microbial communities from Luquillo Experimental Forest, Puerto Rico	Environmental	Terrestrial	Soil	Loam	Forest soil	18	-65	59749	21957	598	0
NitcycUWRG01K412_FD	Soil microbial communities from Arlington Agricultural Research Station in Wisconsin and Kellogg Biological Station in Michigan, replicating the bioenergy cropping systems trials (BCSTs)	Environmental	Terrestrial	Soil	Unclassified	Agricultural land	42.4	-85.37	18102	4395	0	0
GEONDECOMP209_FD	Soil and plant litter microbial communities from temperate forests in California, United States	Environmental	Terrestrial	Plant litter	Unclassified	Unclassified	40.2526	-123.026	25119	5719	38	0
GRESIP088b5f24_FD	Lab enrichment of tropical soil microbial communities from Luquillo Experimental Forest, Puerto Rico	Environmental	Terrestrial	Soil	Unclassified	Forest Soil	18.321	-65.8172	475412	87308	80	0
MayberryNE_Catta_3_FD	Natural and restored wetland microbial communities from the San Francisco Bay, California, USA, that impact long-term carbon sequestration	Environmental	Terrestrial	Soil	Wetlands	Unclassified	38.0525	-121.769	54984	14226	170	0
GRESIP088b5f20_FD	Lab enrichment of tropical soil microbial communities from Luquillo Experimental Forest, Puerto Rico	Environmental	Terrestrial	Soil	Unclassified	Forest Soil	18.321	-65.8172	905705	248053	1330	5
NitcycUWRG09A210_FD	Soil microbial communities from Arlington Agricultural Research Station in Wisconsin and Kellogg Biological Station in Michigan, replicating the bioenergy cropping systems trials (BCSTs)	Environmental	Terrestrial	Soil	Unclassified	Agricultural land	43.3	-89.38	2158	143	0	0
NitcycUG102A4w11_FD	Soil microbial communities from Arlington Agricultural Research Station in Wisconsin and Kellogg Biological Station in Michigan, replicating the bioenergy cropping systems trials (BCSTs)	Environmental	Terrestrial	Soil	Unclassified	Agricultural land	43.3	-89.38	4927	207	0	0
SR_D_MG_FD	Tropical peatland microbial communities from different locations	Environmental	Terrestrial	Soil	Wetlands	Unclassified	-4.5438	-74.6258	28933	3058	0	0
ForSoiNitroNN584_FD	Soil microbial communities from 10 grassland sites in CA, CO, KS, KY, MN, MO, NM, SC, TX, that have been nitrogen fertilized	Environmental	Terrestrial	Soil	Loam	Grasslands	39.0709	-96.5828	16	4	0	0
NitcycUWRG08A412_FD	Soil microbial communities from Arlington Agricultural Research Station in Wisconsin and Kellogg Biological Station in Michigan, replicating the bioenergy cropping systems trials (BCSTs)	Environmental	Terrestrial	Soil	Unclassified	Agricultural land	43.3	-89.38	6765	453	0	0
flu12Cox44000178_FD	Lab enrichment of tropical soil microbial communities from Luquillo Experimental Forest, Puerto Rico	Environmental	Terrestrial	Soil	Unclassified	Forest Soil	18.321	-65.8172	3042129	992950	11049	1
NGESurdeep092012_6_FD	Arctic peat soil microbial communities from the Barrow Environmental Observatory site, Barrow, Alaska, USA	Environmental	Terrestrial	Soil	Unclassified	Permafrost	71.2999	-156.61	220733	80122	3299	1
NitcycUWG10A2w12_FD	Soil microbial communities from Arlington Agricultural Research Station in Wisconsin and Kellogg Biological Station in Michigan, replicating the bioenergy cropping systems trials (BCSTs)	Environmental	Terrestrial	Soil	Unclassified	Agricultural land	43.3	-89.38	3335	332	0	0
SF_Rice_10C_80N__4_FD	Natural and restored wetland microbial communities from the San Francisco Bay, California, USA, that impact long-term carbon sequestration	Environmental	Terrestrial	Soil	Unclassified	Agricultural land	38.1087	-121.653	35417	6232	0	0
RifOxyB1_FD	Soil microbial communities from Rifle, Colorado, USA	Environmental	Terrestrial	Soil	Loam	Unclassified	39.5348	-107.783	190946	82786	4490	21
NGESurdeep092012_2_FD	Arctic peat soil microbial communities from the Barrow Environmental Observatory site, Barrow, Alaska, USA	Environmental	Terrestrial	Soil	Unclassified	Permafrost	71.2999	-156.61	110256	38238	933	0
MedBloCARef_O1_FD	Forest soil microbial communities from multiple locations in Canada and USA	Environmental	Terrestrial	Soil	Loam	Forest soil	38.88	-120.64	120779	33549	86	0
GRESIP168b4f25_FD	Lab enrichment of tropical soil microbial communities from Luquillo Experimental Forest, Puerto Rico	Environmental	Terrestrial	Soil	Unclassified	Forest Soil	18.321	-65.8172	453021	119756	406	0
JacPinW_OM1H0_M1_FD	Forest soil microbial communities from multiple locations in Canada and USA	Environmental	Terrestrial	Soil	Loam	Forest soil	46.42	-83.37	140881	38886	98	0
SalPonC_black_MG_FD	Salt pond water, soil and salt crust microbial communities from South San Francisco under conditions of wetland restoration.	Environmental	Terrestrial	Soil	Wetlands	Unclassified	37.4958	-122.133	192488	68657	1834	1
MedBloCARef_M2_FD	Forest soil microbial communities from multiple locations in Canada and USA	Environmental	Terrestrial	Soil	Loam	Forest soil	38.88	-120.64	111946	33867	31	0
BulsoiMagMametaG_FD	Agave microbial communities from California, USA, and Mexico	Environmental	Terrestrial	Soil	Unclassified	Unclassified	21.195	-100.439	198146	39295	178	0
BlaSpr_A8_Ref_M3_FD	Forest soil microbial communities from multiple locations in Canada and USA	Environmental	Terrestrial	Soil	Loam	Forest soil	49.08	-89.38	212739	67063	840	0
MicForSoSWNH18_O_FD	Forest soil microbial communities from Harvard Forest Long Term Ecological Research (LTER) site in Petersham, MA, for long-term soil warming studies	Environmental	Terrestrial	Soil	Loam	Forest soil	42.533	-72.2095	27682	5928	0	0
SoimicmetaGmgLAC_FD	Soil and rhizosphere microbial communities from Centre INRS-Institut Armand-Frappier, Laval, Canada	Environmental	Terrestrial	Soil	Unclassified	Unclassified	45.54	-73.72	49079	8760	5	0
UWRJL051202B4_FD	Soil microbial communities from Arlington Agricultural Research Station in Wisconsin and Kellogg Biological Station in Michigan, replicating the bioenergy cropping systems trials (BCSTs)	Environmental	Terrestrial	Plant litter	Unclassified	Unclassified	43.3	-89.38	289831	80732	962	0
NitcycUWRG09K212_FD	Soil microbial communities from Arlington Agricultural Research Station in Wisconsin and Kellogg Biological Station in Michigan, replicating the bioenergy cropping systems trials (BCSTs)	Environmental	Terrestrial	Soil	Unclassified	Agricultural land	42.4	-85.37	3805	1138	0	0
GRESIP176b2f21_FD	Lab enrichment of tropical soil microbial communities from Luquillo Experimental Forest, Puerto Rico	Environmental	Terrestrial	Soil	Unclassified	Forest Soil	18.321	-65.8172	589762	162858	394	0
GAPlitter_FD	Agricultural soil microbial communities from Utah and Georgia to study Nitrogen management	Environmental	Terrestrial	Soil	Unclassified	Agricultural land	33.8834	-83.4195	276373	68616	136	0
Shrwel1BS1Day87_FD	Subsurface microbial communities from deep shales in Ohio and West Virginia, USA	Environmental	Terrestrial	Deep subsurface	Unclassified	Unclassified	39.849	-81.036	1133	762	172	0
UWRJL089202R1_FD	Soil microbial communities from Arlington Agricultural Research Station in Wisconsin and Kellogg Biological Station in Michigan, replicating the bioenergy cropping systems trials (BCSTs)	Environmental	Terrestrial	Plant litter	Unclassified	Unclassified	43.3	-89.38	406281	142527	1957	1
NitcycUWRG01A412_FD	Soil microbial communities from Arlington Agricultural Research Station in Wisconsin and Kellogg Biological Station in Michigan, replicating the bioenergy cropping systems trials (BCSTs)	Environmental	Terrestrial	Soil	Unclassified	Agricultural land	43.2958	-89.3799	8170	657	0	0
LARL51metaG_FD	Corn, switchgrass and miscanthus rhizosphere microbial communities from Kellogg Biological Station, Michigan, USA	Environmental	Terrestrial	Soil	Loam	Agricultural soil	42.4774	-85.451	1495536	382138	1830	0
SF_Rice_5C_80N_3_FD	Natural and restored wetland microbial communities from the San Francisco Bay, California, USA, that impact long-term carbon sequestration	Environmental	Terrestrial	Soil	Unclassified	Agricultural land	38.1087	-121.653	35722	7171	57	0
Deesub45470m_DNA_FD	Deep subsurface and oceanic microbial communities from Witwatersrand Basin, South Africa, and the Canadian and Fennoscandian shields and at the Lost City Hydrothermal Field	Environmental	Terrestrial	Deep subsurface	Unclassified	Unclassified	47.8861	-127.75	59309	28429	1251	2
NCControl_FD	Agricultural soil microbial communities from Utah and Georgia to study Nitrogen management	Environmental	Terrestrial	Soil	Unclassified	Agricultural land	41.7655	-111.814	256959	32226	541	0
Rifsed16ft1_FD	Soil microbial communities from Rifle, Colorado, USA	Environmental	Terrestrial	Soil	Unclassified	Unclassified	39.53	-107.78	842294	293414	2826	13
MayberryNW_TuleC_FD	Natural and restored wetland microbial communities from the San Francisco Bay, California, USA, that impact long-term carbon sequestration	Environmental	Terrestrial	Soil	Wetlands	Unclassified	38.0525	-121.769	31481	6756	61	0
UWRJS136409B6_FD	Soil microbial communities from Arlington Agricultural Research Station in Wisconsin and Kellogg Biological Station in Michigan, replicating the bioenergy cropping systems trials (BCSTs)	Environmental	Terrestrial	Soil	Unclassified	Agricultural land	43.3	-89.38	78965	13429	1	0
NitcycUWRBECK03C_FD	Soil microbial communities from Arlington Agricultural Research Station in Wisconsin and Kellogg Biological Station in Michigan, replicating the bioenergy cropping systems trials (BCSTs)	Environmental	Terrestrial	Soil	Unclassified	Agricultural land	43.3	-89.38	4269	194	0	0
SalPon2A_C_D1_MG_FD	Salt pond water, soil and salt crust microbial communities from South San Francisco under conditions of wetland restoration.	Environmental	Terrestrial	Soil	Wetlands	Unclassified	37.4965	-122.133	123502	34614	372	0
GREbulkMGAN111_FD	Lab enrichment of tropical soil microbial communities from Luquillo Experimental Forest, Puerto Rico	Environmental	Terrestrial	Soil	Unclassified	Forest Soil	18.321	-65.8172	1305902	382095	2370	10
CFST25metaG_2_FD	Peatland microbial communities from Stordalen Mire, Sweden	Environmental	Terrestrial	Soil	Peat	Mire	68.3533	19.0466	154884	46828	674	0
LuqExpMetageno16_FD	Tropical forest soil microbial communities from Luquillo Experimental Forest, Puerto Rico	Environmental	Terrestrial	Soil	Loam	Forest soil	18	-65	13411	4000	12	0
atmos_gasesECM1C_2_FD	Hardwood forest soil microbial communities from various locations in the United States	Environmental	Terrestrial	Soil	Unclassified	Forest Soil	39.0844	-86.4705	1671242	456154	4530	1
BarGraIncub1131A_FD	Arctic peat soil microbial communities from the Barrow Environmental Observatory site, Barrow, Alaska, USA	Environmental	Terrestrial	Soil	Unclassified	Permafrost	71.2909	-156.788	159419	68894	3791	0
GWRWT4_14Oct14_FD	Groundwater microbial communities from the Columbia River, Washington, USA	Environmental	Terrestrial	Soil	Sand	Unclassified	46.372	-119.272	34936	9919	295	0
NitcycUWRG01K312_FD	Soil microbial communities from Arlington Agricultural Research Station in Wisconsin and Kellogg Biological Station in Michigan, replicating the bioenergy cropping systems trials (BCSTs)	Environmental	Terrestrial	Soil	Unclassified	Agricultural land	43.3	-89.38	3084	145	0	0
RushSE_CattailNL_2_FD	Natural and restored wetland microbial communities from the San Francisco Bay, California, USA, that impact long-term carbon sequestration	Environmental	Terrestrial	Soil	Wetlands	Unclassified	38.2245	-122.019	38440	7507	126	0
NGESurdeep072012_6_FD	Arctic peat soil microbial communities from the Barrow Environmental Observatory site, Barrow, Alaska, USA	Environmental	Terrestrial	Soil	Unclassified	Permafrost	71.2999	-156.61	132469	51993	1534	0
HBST50metaG_FD	Peatland microbial communities from Stordalen Mire, Sweden	Environmental	Terrestrial	Soil	Peat	Mire	68.3529	19.0475	101606	43365	2278	0
NitcycUWRG09K512_FD	Soil microbial communities from Arlington Agricultural Research Station in Wisconsin and Kellogg Biological Station in Michigan, replicating the bioenergy cropping systems trials (BCSTs)	Environmental	Terrestrial	Soil	Unclassified	Agricultural land	43.3	-89.38	4903	308	0	0
NitcycUWG052A112_FD	Soil microbial communities from Arlington Agricultural Research Station in Wisconsin and Kellogg Biological Station in Michigan, replicating the bioenergy cropping systems trials (BCSTs)	Environmental	Terrestrial	Soil	Unclassified	Agricultural land	43.3	-89.38	11165	2056	0	0
NitcycUWRG07A110_FD	Soil microbial communities from Arlington Agricultural Research Station in Wisconsin and Kellogg Biological Station in Michigan, replicating the bioenergy cropping systems trials (BCSTs)	Environmental	Terrestrial	Soil	Unclassified	Agricultural land	43.3	-89.38	2013	51	0	0
S3v_5metaG_FD	Systems level insights into methane cycling in arid and semi-arid ecosystems	Environmental	Terrestrial	Soil	Sand	Desert	33.305	-116.255	349658	71523	758	0
GRESIP089b5f23_FD	Lab enrichment of tropical soil microbial communities from Luquillo Experimental Forest, Puerto Rico	Environmental	Terrestrial	Soil	Unclassified	Forest Soil	18.321	-65.8172	733434	201409	447	0
15_S_MG_FD	Soil and ectomycorrhiza microbial communities from Populus trichocarpa stands in riparian zones in the Pacific Northwest, United States	Environmental	Terrestrial	Soil	Unclassified	Riparian soil	45.9233	-120.701	291692	40738	9	0
LuqExpMetageno66_FD	Tropical forest soil microbial communities from Luquillo Experimental Forest, Puerto Rico	Environmental	Terrestrial	Soil	Loam	Forest soil	18	-65	36671	10653	264	0
SF_Rice_20C_0N_4_FD	Natural and restored wetland microbial communities from the San Francisco Bay, California, USA, that impact long-term carbon sequestration	Environmental	Terrestrial	Soil	Unclassified	Agricultural land	38.1087	-121.653	34758	7641	11	0
BarGraIncu00421A_FD	Arctic peat soil microbial communities from the Barrow Environmental Observatory site, Barrow, Alaska, USA	Environmental	Terrestrial	Soil	Unclassified	Permafrost	71.2709	-156.81	306722	117868	1993	1
714S33034metaG_2_FD	Peatland microbial communities from Stordalen Mire, Sweden	Environmental	Terrestrial	Soil	Peat	Mire	68.3531	19.0476	128428	54679	3129	0
MayberryNE_TuleB_FD	Natural and restored wetland microbial communities from the San Francisco Bay, California, USA, that impact long-term carbon sequestration	Environmental	Terrestrial	Soil	Wetlands	Unclassified	38.0525	-121.769	37311	7513	10	0
Lox_Sample_13_FD	Soil microbial communities from Loxahatchee National Wildlife Refuge, Florida, United States	Environmental	Terrestrial	Soil	Wetlands	Unclassified	26.5008	-80.2398	2154409	638057	12273	1
TexAe_RefH0_O1_FD	Forest soil microbial communities from multiple locations in Canada and USA	Environmental	Terrestrial	Soil	Loam	Forest soil	31.11	-95.15	78047	14963	213	0
RifCSP16_1_FD	Soil microbial communities from Rifle, Colorado, USA	Environmental	Terrestrial	Soil	Loam	Unclassified	39.5348	-107.783	1123331	394396	5898	22
NitcycUWG08A3a11_FD	Soil microbial communities from Arlington Agricultural Research Station in Wisconsin and Kellogg Biological Station in Michigan, replicating the bioenergy cropping systems trials (BCSTs)	Environmental	Terrestrial	Soil	Unclassified	Agricultural land	43.3	-89.38	8761	1418	0	0
III_Fen_E2_1_FD	Peat permafrost microbial communities from Stordalen Mire near Abisko, Sweden	Environmental	Terrestrial	Soil	Peat	Fen	68.3532	19.0469	234737	87854	1657	2
NGESurdeep092012_FD	Arctic peat soil microbial communities from the Barrow Environmental Observatory site, Barrow, Alaska, USA	Environmental	Terrestrial	Soil	Unclassified	Permafrost	71.2999	-156.61	120587	46458	956	0
GWRWT2_25Nov14_FD	Groundwater microbial communities from the Columbia River, Washington, USA	Environmental	Terrestrial	Soil	Sand	Unclassified	46.372	-119.272	7430	2021	6	0
CBST100metaG_FD	Peatland microbial communities from Stordalen Mire, Sweden	Environmental	Terrestrial	Soil	Peat	Mire	68.3529	19.0475	68329	30571	1561	0
C24D4metaG_FD	Soil microbial communities from West Virginia University Organic Research Farm, Morgantown, WV, United States	Environmental	Terrestrial	Soil	Unclassified	Agricultural land	39.6475	-79.9369	859056	169591	289	0
MedBloCAOM2_M2_FD	Forest soil microbial communities from multiple locations in Canada and USA	Environmental	Terrestrial	Soil	Loam	Forest soil	38.88	-120.64	96329	22242	62	0
GWRWT4_30Apr14_FD	Groundwater microbial communities from the Columbia River, Washington, USA	Environmental	Terrestrial	Soil	Sand	Unclassified	46.372	-119.272	52213	11882	368	6
NGESurdeep092012_3_FD	Arctic peat soil microbial communities from the Barrow Environmental Observatory site, Barrow, Alaska, USA	Environmental	Terrestrial	Soil	Unclassified	Permafrost	71.2999	-156.61	125456	54833	1893	0
KBSS23HmetaG_FD	Corn, switchgrass and miscanthus rhizosphere microbial communities from Kellogg Biological Station, Michigan, USA	Environmental	Terrestrial	Soil	Loam	Agricultural soil	42.3948	-85.3738	1949489	487107	2306	1
DL13B_FD	Soil microbial communities from H.J. Andrews Experimental Forest, Oregon, United States	Environmental	Terrestrial	Soil	Unclassified	Forest Soil	44.23	-122.22	161471	41478	7	0
III_Palsa_E1_1_FD	Peat permafrost microbial communities from Stordalen Mire near Abisko, Sweden	Environmental	Terrestrial	Soil	Peat	Permafrost	68.3535	19.0473	236794	80546	2297	52
GWRWN3_10_20_FD	Groundwater microbial communities from the Columbia River, Washington, USA	Environmental	Terrestrial	Soil	Sand	Unclassified	46.372	-119.272	76204	17231	100	0
5ButaG_2_FD	Rhizosphere and bulk soil microbial communities from Harvard Forest, USA	Environmental	Terrestrial	Soil	Unclassified	Forest Soil	42.5502	-72.1737	183	10	0	0
UWRJL029104C1_FD	Soil microbial communities from Arlington Agricultural Research Station in Wisconsin and Kellogg Biological Station in Michigan, replicating the bioenergy cropping systems trials (BCSTs)	Environmental	Terrestrial	Plant litter	Unclassified	Unclassified	43.3	-89.38	344480	100975	1757	1
Wag42014_10_10_FD	Deep subsurface shale carbon reservoir microbial communities from Ohio and West Virginia, USA	Environmental	Terrestrial	Deep subsurface	Fracking water	Shale carbon reservoir	40.178	-81.073	4016	1991	181	0
II_Palsa_N2_2_FD	Peat permafrost microbial communities from Stordalen Mire near Abisko, Sweden	Environmental	Terrestrial	Soil	Peat	Permafrost	68.3535	19.0473	529015	142686	2704	1
Wag42014_12_17_FD	Deep subsurface shale carbon reservoir microbial communities from Ohio and West Virginia, USA	Environmental	Terrestrial	Deep subsurface	Fracking water	Shale carbon reservoir	40.178	-81.073	1583	1162	238	0
NitcycUWRG08A212_FD	Soil microbial communities from Arlington Agricultural Research Station in Wisconsin and Kellogg Biological Station in Michigan, replicating the bioenergy cropping systems trials (BCSTs)	Environmental	Terrestrial	Soil	Unclassified	Agricultural land	43.3	-89.38	6591	1357	0	0
LuqExpMetageno37_FD	Tropical forest soil microbial communities from Luquillo Experimental Forest, Puerto Rico	Environmental	Terrestrial	Soil	Loam	Forest soil	18	-65	71421	22710	380	0
UWRJL166409R6_FD	Soil microbial communities from Arlington Agricultural Research Station in Wisconsin and Kellogg Biological Station in Michigan, replicating the bioenergy cropping systems trials (BCSTs)	Environmental	Terrestrial	Plant litter	Unclassified	Unclassified	43.3	-89.38	199527	60121	578	0
PerMet812P2M_FD	Thawing permafrost microbial communities from the Arctic, studying carbon transformations	Environmental	Terrestrial	Soil	Wetlands	Permafrost	68.3534	19.0473	250562	39642	5	0
II_Palsa_E1_3_FD	Peat permafrost microbial communities from Stordalen Mire near Abisko, Sweden	Environmental	Terrestrial	Soil	Peat	Permafrost	68.3535	19.0473	391597	123747	3953	0
I_Bog_E3_2_FD	Peat permafrost microbial communities from Stordalen Mire near Abisko, Sweden	Environmental	Terrestrial	Soil	Peat	Bog	68.3532	19.0477	336624	99146	1592	0
NitcycUWRG07A412_FD	Soil microbial communities from Arlington Agricultural Research Station in Wisconsin and Kellogg Biological Station in Michigan, replicating the bioenergy cropping systems trials (BCSTs)	Environmental	Terrestrial	Soil	Unclassified	Agricultural land	43.3	-89.38	3314	237	0	0
BONnt5_FD	Terrestrial sediment cell enrichment communities for BONCAT metagenomics from Utah, United States	Environmental	Terrestrial	Geologic	Sediment	Unclassified	38.715	-109.691	50607	12539	100	0
OrgsoiDNA2013045_FD	Permafrost soil microbial communities from the Arctic, to analyse light accelerated degradation of dissolved organic matter (DOM)	Environmental	Terrestrial	Soil	Wetlands	Permafrost	68.6139	-149.315	127596	31146	521	0
NitcycUWRBECK01C_FD	Soil microbial communities from Arlington Agricultural Research Station in Wisconsin and Kellogg Biological Station in Michigan, replicating the bioenergy cropping systems trials (BCSTs)	Environmental	Terrestrial	Soil	Unclassified	Agricultural land	43.56	-89.32	4235	909	49	0
GWRWN1_30_40_FD	Groundwater microbial communities from the Columbia River, Washington, USA	Environmental	Terrestrial	Soil	Sand	Unclassified	46.372	-119.272	128194	42597	735	0
MicForSoSWNH22_O_FD	Forest soil microbial communities from Harvard Forest Long Term Ecological Research (LTER) site in Petersham, MA, for long-term soil warming studies	Environmental	Terrestrial	Soil	Loam	Forest soil	42.533	-72.2095	14846	3845	5	0
LuqExpMetageno48_FD	Tropical forest soil microbial communities from Luquillo Experimental Forest, Puerto Rico	Environmental	Terrestrial	Soil	Loam	Forest soil	18	-65	26889	8741	124	0
12C_Control_Day5_FD	Soil microbial communities from agricultural site in Penn Yan, New York, United States	Environmental	Terrestrial	Soil	Unclassified	Agricultural land	42.673	-77.032	1741137	457842	1413	6
GraSoiAngelo_132_FD	Grasslands soil microbial communities from the Angelo Coastal Reserve, California, USA	Environmental	Terrestrial	Soil	Unclassified	Grasslands	39.7392	-123.631	306364	139634	3243	0
NitcycUWRG06K312_FD	Soil microbial communities from Arlington Agricultural Research Station in Wisconsin and Kellogg Biological Station in Michigan, replicating the bioenergy cropping systems trials (BCSTs)	Environmental	Terrestrial	Soil	Unclassified	Agricultural land	42.4	-85.37	5049	678	0	0
GWRWT4_21May14_FD	Groundwater microbial communities from the Columbia River, Washington, USA	Environmental	Terrestrial	Soil	Sand	Unclassified	46.372	-119.272	17335	5391	272	0
UWRJL151409C6_FD	Soil microbial communities from Arlington Agricultural Research Station in Wisconsin and Kellogg Biological Station in Michigan, replicating the bioenergy cropping systems trials (BCSTs)	Environmental	Terrestrial	Plant litter	Unclassified	Unclassified	43.3	-89.38	157360	37422	161	0
LuqExpMetageno60_FD	Tropical forest soil microbial communities from Luquillo Experimental Forest, Puerto Rico	Environmental	Terrestrial	Soil	Loam	Forest soil	18	-65	21235	6650	158	0
MicForSoilBWH4_O_FD	Forest soil microbial communities from Harvard Forest Long Term Ecological Research (LTER) site in Petersham, MA, for long-term soil warming studies	Environmental	Terrestrial	Soil	Loam	Forest soil	42.4711	-72.1726	8196	1260	0	0
CNK28_metaG_FD	Soil microbial communities from Purdue University Martell Research Forest, Indiana, United States	Environmental	Terrestrial	Soil	Unclassified	Forest Soil	40.4449	-87.0297	82008	17566	109	0
OrgsoiDNA2013048_FD	Permafrost soil microbial communities from the Arctic, to analyse light accelerated degradation of dissolved organic matter (DOM)	Environmental	Terrestrial	Soil	Wetlands	Permafrost	68.6137	-149.314	104765	25980	191	0
GraSoiAngelo_121_FD	Grasslands soil microbial communities from the Angelo Coastal Reserve, California, USA	Environmental	Terrestrial	Soil	Unclassified	Grasslands	39.7392	-123.631	331102	142923	2613	0
CZO8metaG_FD	Vadose zone soil and rhizosphere microbial communities from the Eel River Critical Zone Observatory, Northern California to study diel carbon cycling	Environmental	Terrestrial	Soil	Vadose zone	Unclassified	39.7291	-123.642	1072054	318786	1080	0
SalPonR1_A_D2_MG_FD	Salt pond water, soil and salt crust microbial communities from South San Francisco under conditions of wetland restoration.	Environmental	Terrestrial	Soil	Wetlands	Unclassified	37.4969	-122.133	184150	70337	2227	19
WestPond_TuleA_D_FD	Natural and restored wetland microbial communities from the San Francisco Bay, California, USA, that impact long-term carbon sequestration	Environmental	Terrestrial	Soil	Wetlands	Unclassified	38.1075	-121.65	16704	2107	7	1
CZO8metaG_3_FD	Vadose zone soil and rhizosphere microbial communities from the Eel River Critical Zone Observatory, Northern California to study diel carbon cycling	Environmental	Terrestrial	Soil	Vadose zone	Unclassified	39.7291	-123.642	812929	259283	2075	0
GraSoiAngelo_125_FD	Grasslands soil microbial communities from the Angelo Coastal Reserve, California, USA	Environmental	Terrestrial	Soil	Unclassified	Grasslands	39.7392	-123.631	387488	155946	3968	0
NI19A_FD	Soil microbial communities from H.J. Andrews Experimental Forest, Oregon, United States	Environmental	Terrestrial	Soil	Unclassified	Forest Soil	44.23	-122.22	91590	17872	6	0
GRESIP109b1f22_FD	Lab enrichment of tropical soil microbial communities from Luquillo Experimental Forest, Puerto Rico	Environmental	Terrestrial	Soil	Unclassified	Forest Soil	18.321	-65.8172	860540	239474	1246	0
sta12Can44000108_FD	Lab enrichment of tropical soil microbial communities from Luquillo Experimental Forest, Puerto Rico	Environmental	Terrestrial	Soil	Unclassified	Forest Soil	18.321	-65.8172	2575846	855757	9059	10
GWRWN3_20_30_FD	Groundwater microbial communities from the Columbia River, Washington, USA	Environmental	Terrestrial	Soil	Sand	Unclassified	46.372	-119.272	83926	24548	79	0
714S21014metaG_FD	Peatland microbial communities from Stordalen Mire, Sweden	Environmental	Terrestrial	Soil	Peat	Mire	68.3532	19.0474	124043	44001	1189	0
GRESIP174b1f22_FD	Lab enrichment of tropical soil microbial communities from Luquillo Experimental Forest, Puerto Rico	Environmental	Terrestrial	Soil	Unclassified	Forest Soil	18.321	-65.8172	1041491	268078	977	1
NCAS100_FD	Agricultural soil microbial communities from Utah and Georgia to study Nitrogen management	Environmental	Terrestrial	Soil	Unclassified	Agricultural land	41.7655	-111.814	191818	40460	580	0
Antgeofumaro1A2D_FD	Fumarolic subsurface microbial communities from Tramway Ridge at Mt. Erebus, Antarctica for carbon cycling studies in geothermal environments	Environmental	Terrestrial	Volcanic	Fumaroles	Unclassified	-77.5182	167.111	1104	623	39	0
BarGraNGADG00211_FD	Arctic peat soil microbial communities from the Barrow Environmental Observatory site, Barrow, Alaska, USA	Environmental	Terrestrial	Soil	Unclassified	Permafrost	71.2838	-156.599	253837	103494	3118	0
22E_NmetaG_FD	Soil microbial communities from hillslopes of Landscape Evolution Observatory, University of Arizona, Oracle, AZ, United States	Environmental	Terrestrial	Soil	Unclassified	Unclassified	32.5788	-110.851	32752	8450	140	0
OrgsoiDNA2013046_FD	Permafrost soil microbial communities from the Arctic, to analyse light accelerated degradation of dissolved organic matter (DOM)	Environmental	Terrestrial	Soil	Wetlands	Permafrost	68.6139	-149.315	256949	74777	1279	0
NitcycUWRG01A311_FD	Soil microbial communities from Arlington Agricultural Research Station in Wisconsin and Kellogg Biological Station in Michigan, replicating the bioenergy cropping systems trials (BCSTs)	Environmental	Terrestrial	Soil	Unclassified	Agricultural land	43.2958	-89.3799	3337	204	0	0
BONt10_FD	Terrestrial sediment cell enrichment communities for BONCAT metagenomics from Utah, United States	Environmental	Terrestrial	Geologic	Sediment	Unclassified	38.715	-109.691	61541	9509	113	0
NitcycUWG05A4w11_FD	Soil microbial communities from Arlington Agricultural Research Station in Wisconsin and Kellogg Biological Station in Michigan, replicating the bioenergy cropping systems trials (BCSTs)	Environmental	Terrestrial	Soil	Unclassified	Agricultural land	43.3	-89.38	7434	607	0	0
NitcycUWRHINK08D_FD	Soil microbial communities from Arlington Agricultural Research Station in Wisconsin and Kellogg Biological Station in Michigan, replicating the bioenergy cropping systems trials (BCSTs)	Environmental	Terrestrial	Soil	Unclassified	Agricultural land	43.3	-89.38	3076	174	0	0
UWRJL178409R2_FD	Soil microbial communities from Arlington Agricultural Research Station in Wisconsin and Kellogg Biological Station in Michigan, replicating the bioenergy cropping systems trials (BCSTs)	Environmental	Terrestrial	Plant litter	Unclassified	Unclassified	43.3	-89.38	356557	118431	1270	0
UWRJS079202R5_FD	Soil microbial communities from Arlington Agricultural Research Station in Wisconsin and Kellogg Biological Station in Michigan, replicating the bioenergy cropping systems trials (BCSTs)	Environmental	Terrestrial	Soil	Unclassified	Agricultural land	43.3	-89.38	223166	45779	78	0
GWRWS2_0_10_FD	Groundwater microbial communities from the Columbia River, Washington, USA	Environmental	Terrestrial	Soil	Sand	Unclassified	46.372	-119.272	10325	1379	15	0
LuqExpMetageno41_FD	Tropical forest soil microbial communities from Luquillo Experimental Forest, Puerto Rico	Environmental	Terrestrial	Soil	Loam	Forest soil	18	-65	45580	16066	250	0
KBSK5502metaG_FD	Corn, switchgrass and miscanthus rhizosphere microbial communities from Kellogg Biological Station, Michigan, USA	Environmental	Terrestrial	Soil	Loam	Agricultural soil	42.3948	-85.3738	1950474	588144	8900	2
LuqExpMetageno80_FD	Tropical forest soil microbial communities from Luquillo Experimental Forest, Puerto Rico	Environmental	Terrestrial	Soil	Loam	Forest soil	18	-65	227229	65766	619	0
NitcycUWRG08A110_FD	Soil microbial communities from Arlington Agricultural Research Station in Wisconsin and Kellogg Biological Station in Michigan, replicating the bioenergy cropping systems trials (BCSTs)	Environmental	Terrestrial	Soil	Unclassified	Agricultural land	43.3	-89.38	3867	546	0	0
GEONQ75_FD	Soil and plant litter microbial communities from temperate forests in California, United States	Environmental	Terrestrial	Soil	Unclassified	Forest Soil	40.2523	-123.026	3856	305	0	0
GWRWN2_40_50_FD	Groundwater microbial communities from the Columbia River, Washington, USA	Environmental	Terrestrial	Soil	Sand	Unclassified	46.372	-119.272	88899	20002	106	0
Lox_Sample_11_FD	Soil microbial communities from Loxahatchee National Wildlife Refuge, Florida, United States	Environmental	Terrestrial	Soil	Wetlands	Unclassified	26.5008	-80.2398	2800244	884546	17466	13
EasRivMeERMZT100_FD	Soil and sediment microbial communities from the East River, CO, USA	Environmental	Terrestrial	Soil	Floodplain	Unclassified	38.8898	-106.908	144624	47263	1368	3
OWC_Aug_M2_C1_D1_FD	Wetland microbial communities from Old Woman Creek delta, Ohio, USA	Environmental	Terrestrial	Soil	Wetlands	Unclassified	41.3769	-82.5097	3038498	604126	673	1
III_Bog_E2_1_FD	Peat permafrost microbial communities from Stordalen Mire near Abisko, Sweden	Environmental	Terrestrial	Soil	Peat	Bog	68.3532	19.0477	183268	56660	1999	37
ForSoiNitrNN1116_FD	Soil microbial communities from 10 grassland sites in CA, CO, KS, KY, MN, MO, NM, SC, TX, that have been nitrogen fertilized	Environmental	Terrestrial	Soil	Loam	Grasslands	40.8167	-104.767	2831	580	0	0
MedBloCAOM1_M1_FD	Forest soil microbial communities from multiple locations in Canada and USA	Environmental	Terrestrial	Soil	Loam	Forest soil	38.88	-120.64	200653	56470	218	0
GEONDECOMP319_FD	Soil and plant litter microbial communities from temperate forests in California, United States	Environmental	Terrestrial	Plant litter	Unclassified	Unclassified	40.2526	-123.026	52232	9734	71	0
CNK09_metaG_FD	Soil microbial communities from Purdue University Martell Research Forest, Indiana, United States	Environmental	Terrestrial	Soil	Unclassified	Forest Soil	40.4449	-87.0297	136445	36897	457	0
JacPin_JW_Ref_M3_FD	Forest soil microbial communities from multiple locations in Canada and USA	Environmental	Terrestrial	Soil	Loam	Forest soil	46.42	-83.37	157276	38920	16	0
NR06B_FD	Soil microbial communities from H.J. Andrews Experimental Forest, Oregon, United States	Environmental	Terrestrial	Soil	Unclassified	Forest Soil	44.23	-122.22	105822	19381	0	0
GWRWN3_30_40_FD	Groundwater microbial communities from the Columbia River, Washington, USA	Environmental	Terrestrial	Soil	Sand	Unclassified	46.372	-119.272	41638	7517	81	0
Subbio12Aug_8Bad_FD	Serpentinite rock and fluid microbial communities from Tablelands Ophiolite (Newfoundland), Coast Range Ophiolite (California) and Ligurian Springs (Italy)	Environmental	Terrestrial	Deep subsurface	Unclassified	Unclassified	38.874	-122.439	49887	21273	1218	0
SF_Rice_25C_80N__2_FD	Natural and restored wetland microbial communities from the San Francisco Bay, California, USA, that impact long-term carbon sequestration	Environmental	Terrestrial	Soil	Unclassified	Agricultural land	38.1087	-121.653	16305	2411	0	0
ForSoiNitroNN357_FD	Soil microbial communities from 10 grassland sites in CA, CO, KS, KY, MN, MO, NM, SC, TX, that have been nitrogen fertilized	Environmental	Terrestrial	Soil	Loam	Grasslands	35.913	-79.056	4652	364	1	0
MicForSoSWNH13_O_FD	Forest soil microbial communities from Harvard Forest Long Term Ecological Research (LTER) site in Petersham, MA, for long-term soil warming studies	Environmental	Terrestrial	Soil	Loam	Forest soil	42.533	-72.2095	72726	23023	368	0
NitcycUWRG08A111_FD	Soil microbial communities from Arlington Agricultural Research Station in Wisconsin and Kellogg Biological Station in Michigan, replicating the bioenergy cropping systems trials (BCSTs)	Environmental	Terrestrial	Soil	Unclassified	Agricultural land	43.3	-89.38	2160	176	0	0
Joice_CattailNLC_FD	Natural and restored wetland microbial communities from the San Francisco Bay, California, USA, that impact long-term carbon sequestration	Environmental	Terrestrial	Soil	Wetlands	Unclassified	38.1971	-122.01	27320	8002	168	0
NGESurshal072012_3_FD	Arctic peat soil microbial communities from the Barrow Environmental Observatory site, Barrow, Alaska, USA	Environmental	Terrestrial	Soil	Unclassified	Permafrost	71.2999	-156.61	122101	43394	619	0
RVTome_5_FD	Soil microbial communities from uranium-contaminated sites across the Upper Colorado River Basin region	Environmental	Terrestrial	Soil	Unclassified	Uranium contaminated	42.9888	-108.399	1529657	477108	5256	12
19_S_MG_FD	Soil and ectomycorrhiza microbial communities from Populus trichocarpa stands in riparian zones in the Pacific Northwest, United States	Environmental	Terrestrial	Soil	Unclassified	Riparian soil	47.5302	-121.825	488793	80389	320	0
ForSoiNitroNN405_FD	Soil microbial communities from 10 grassland sites in CA, CO, KS, KY, MN, MO, NM, SC, TX, that have been nitrogen fertilized	Environmental	Terrestrial	Soil	Loam	Forest soil	44.2052	-122.128	19	0	0	0
NitcycUWRHINK07C_FD	Soil microbial communities from Arlington Agricultural Research Station in Wisconsin and Kellogg Biological Station in Michigan, replicating the bioenergy cropping systems trials (BCSTs)	Environmental	Terrestrial	Soil	Unclassified	Agricultural land	43.43	-89.41	574	46	0	0
BulsoinjaPemetaG_FD	Agave microbial communities from California, USA, and Mexico	Environmental	Terrestrial	Soil	Unclassified	Unclassified	20.686	-101.875	210484	37314	3	0
GWRWS1_20_30_FD	Groundwater microbial communities from the Columbia River, Washington, USA	Environmental	Terrestrial	Soil	Sand	Unclassified	46.372	-119.272	96257	30472	288	0
Shrwel1BS1Day122_FD	Subsurface microbial communities from deep shales in Ohio and West Virginia, USA	Environmental	Terrestrial	Deep subsurface	Unclassified	Unclassified	39.849	-81.036	2275	1088	163	0
C48D1metaG_FD	Soil microbial communities from West Virginia University Organic Research Farm, Morgantown, WV, United States	Environmental	Terrestrial	Soil	Unclassified	Agricultural land	39.6475	-79.9369	1456317	312627	678	0
GRESIP108b1f22_FD	Lab enrichment of tropical soil microbial communities from Luquillo Experimental Forest, Puerto Rico	Environmental	Terrestrial	Soil	Unclassified	Forest Soil	18.321	-65.8172	825636	209437	773	0
GraSoiAngelo_130_FD	Grasslands soil microbial communities from the Angelo Coastal Reserve, California, USA	Environmental	Terrestrial	Soil	Unclassified	Grasslands	39.7392	-123.631	319584	125379	2662	0
SR_E_MG_FD	Tropical peatland microbial communities from different locations	Environmental	Terrestrial	Soil	Wetlands	Unclassified	-4.5438	-74.6258	35874	2780	0	0
MedBloCAOM2_O3_FD	Forest soil microbial communities from multiple locations in Canada and USA	Environmental	Terrestrial	Soil	Loam	Forest soil	38.88	-120.64	76814	15545	12	0
ForSoiNitroNN106_FD	Soil microbial communities from 10 grassland sites in CA, CO, KS, KY, MN, MO, NM, SC, TX, that have been nitrogen fertilized	Environmental	Terrestrial	Soil	Loam	Forest soil	39.2355	-121.284	1340	139	0	0
ER_DNA_203_FD	Soil microbial communities from the East River watershed near Crested Butte, Colorado, United States	Environmental	Terrestrial	Soil	Bulk soil	Meadow	38.9206	-106.949	300916	77135	222	0
NitcycUWG10A4w12_FD	Soil microbial communities from Arlington Agricultural Research Station in Wisconsin and Kellogg Biological Station in Michigan, replicating the bioenergy cropping systems trials (BCSTs)	Environmental	Terrestrial	Soil	Unclassified	Agricultural land	43.3	-89.38	8673	1090	0	0
MSEWelMarce5H_FC_FD	Subsurface microbial communities from deep shales in Ohio and West Virginia, USA	Environmental	Terrestrial	Geologic	Sediment	Unclassified	39.6017	-79.9761	169773	64836	2407	293
NitcycUWRSCHO21E_FD	Soil microbial communities from Arlington Agricultural Research Station in Wisconsin and Kellogg Biological Station in Michigan, replicating the bioenergy cropping systems trials (BCSTs)	Environmental	Terrestrial	Soil	Unclassified	Agricultural land	43.3	-89.38	3593	265	0	0
NitcycUWG06A2a11_FD	Soil microbial communities from Arlington Agricultural Research Station in Wisconsin and Kellogg Biological Station in Michigan, replicating the bioenergy cropping systems trials (BCSTs)	Environmental	Terrestrial	Soil	Unclassified	Agricultural land	43.3	-89.38	2841	92	0	0
HubBroMetageWRM4_FD	Soil microbial communities from the Hubbard Brook experimental Forest, New Hampshire, under manipulated climate change conditions.	Environmental	Terrestrial	Soil	Loam	Forest soil			761149	217613	3013	0
ForSoiNitroNN117_FD	Soil microbial communities from 10 grassland sites in CA, CO, KS, KY, MN, MO, NM, SC, TX, that have been nitrogen fertilized	Environmental	Terrestrial	Soil	Loam	Forest soil	39.2355	-121.284	151	22	0	0
NitcycUWRROWE17C_FD	Soil microbial communities from Arlington Agricultural Research Station in Wisconsin and Kellogg Biological Station in Michigan, replicating the bioenergy cropping systems trials (BCSTs)	Environmental	Terrestrial	Soil	Unclassified	Agricultural land	43.42	-89.32	21944	4799	14	0
GRESIP053b4f25_FD	Lab enrichment of tropical soil microbial communities from Luquillo Experimental Forest, Puerto Rico	Environmental	Terrestrial	Soil	Unclassified	Forest Soil	18.321	-65.8172	598777	163328	632	0
GraSoiAngelo_149_FD	Grasslands soil microbial communities from the Angelo Coastal Reserve, California, USA	Environmental	Terrestrial	Soil	Unclassified	Grasslands	39.7392	-123.631	440072	171227	4573	0
NR01B_FD	Soil microbial communities from H.J. Andrews Experimental Forest, Oregon, United States	Environmental	Terrestrial	Soil	Unclassified	Forest Soil	44.23	-122.22	61355	9423	0	0
UWRJL119311C1_FD	Soil microbial communities from Arlington Agricultural Research Station in Wisconsin and Kellogg Biological Station in Michigan, replicating the bioenergy cropping systems trials (BCSTs)	Environmental	Terrestrial	Plant litter	Unclassified	Unclassified	43.3	-89.38	363141	116993	2538	0
II_Fen_E1_1_FD	Peat permafrost microbial communities from Stordalen Mire near Abisko, Sweden	Environmental	Terrestrial	Soil	Peat	Fen	68.3532	19.0469	122549	41079	1107	1
MB2SIPfraction_FD	Lab enriched peat soil microbial communities from two peatlands near Ithaca, NY, United States	Environmental	Terrestrial	Soil	Peat	Bog	42.5488	-76.2662	183666	68677	1938	0
Coa_R1_2_FD	Surface soil microbial communities from Centralia Pennsylvania, which are recovering from an underground coalmine fire.	Environmental	Terrestrial	Soil	Unclassified	Unclassified	40.7999	-76.3402	827529	227941	4286	15
Sb_taG_FD	Peatlands soil microbial communities from Germany and Austria, that are sulfate reducing	Environmental	Terrestrial	Soil	Unclassified	Unclassified	50.1318	11.881	136126	40903	1081	0
BlaSpr_A8_OM3_M1_FD	Forest soil microbial communities from multiple locations in Canada and USA	Environmental	Terrestrial	Soil	Loam	Forest soil	49.08	-89.38	106702	31441	414	0
CO14B_FD	Soil microbial communities from H.J. Andrews Experimental Forest, Oregon, United States	Environmental	Terrestrial	Soil	Unclassified	Forest Soil	44.23	-122.22	73822	14716	3	0
LuqExpMetageno21_FD	Tropical forest soil microbial communities from Luquillo Experimental Forest, Puerto Rico	Environmental	Terrestrial	Soil	Loam	Forest soil	18	-65	56931	21602	338	0
I_Bog_N2_3_FD	Peat permafrost microbial communities from Stordalen Mire near Abisko, Sweden	Environmental	Terrestrial	Soil	Peat	Bog	68.3532	19.0477	638124	205268	4396	0
GraSoiAngelo_123_FD	Grasslands soil microbial communities from the Angelo Coastal Reserve, California, USA	Environmental	Terrestrial	Soil	Unclassified	Grasslands	39.7392	-123.631	156641	77401	2059	0
713P3X1metaG_FD	Peatland microbial communities from Stordalen Mire, Sweden	Environmental	Terrestrial	Soil	Peat	Mire	68.3534	19.0473	188082	73409	2400	0
II_Fen_N1_3_FD	Peat permafrost microbial communities from Stordalen Mire near Abisko, Sweden	Environmental	Terrestrial	Soil	Peat	Fen	68.3532	19.0469	155397	36546	424	0
RushMan_ThreeSqA_2_FD	Natural and restored wetland microbial communities from the San Francisco Bay, California, USA, that impact long-term carbon sequestration	Environmental	Terrestrial	Soil	Wetlands	Unclassified	38.2098	-122.033	19437	2853	0	0
BarGraNGADG00212_2_FD	Arctic peat soil microbial communities from the Barrow Environmental Observatory site, Barrow, Alaska, USA	Environmental	Terrestrial	Soil	Peat	Unclassified	71.2905	-156.789	466200	161113	1653	0
GRESIP089b5f25_FD	Lab enrichment of tropical soil microbial communities from Luquillo Experimental Forest, Puerto Rico	Environmental	Terrestrial	Soil	Unclassified	Forest Soil	18.321	-65.8172	652482	183447	736	1
SoimicmetaGmgLAB_FD	Soil and rhizosphere microbial communities from Centre INRS-Institut Armand-Frappier, Laval, Canada	Environmental	Terrestrial	Soil	Unclassified	Unclassified	45.54	-73.72	38141	4986	1	0
ForSoiNitroNN118_FD	Soil microbial communities from 10 grassland sites in CA, CO, KS, KY, MN, MO, NM, SC, TX, that have been nitrogen fertilized	Environmental	Terrestrial	Soil	Loam	Forest soil	39.2355	-121.284	105	16	0	0
SalPon2A_A_D2_MG_FD	Salt pond water, soil and salt crust microbial communities from South San Francisco under conditions of wetland restoration.	Environmental	Terrestrial	Soil	Wetlands	Unclassified	37.4962	-122.133	116376	27079	289	7
JacPin_JW_Ref_O2_FD	Forest soil microbial communities from multiple locations in Canada and USA	Environmental	Terrestrial	Soil	Loam	Forest soil	46.42	-83.37	1549636	512213	7290	2
ER_DNA_120_FD	Soil microbial communities from the East River watershed near Crested Butte, Colorado, United States	Environmental	Terrestrial	Soil	Bulk soil	Meadow	38.9206	-106.949	447091	94332	536	0
MicForSoPHDC13_O_FD	Forest soil microbial communities from Harvard Forest Long Term Ecological Research (LTER) site in Petersham, MA, for long-term soil warming studies	Environmental	Terrestrial	Soil	Loam	Forest soil	42.5504	-72.1802	19722	3317	1	0
III_Palsa_E2_1_FD	Peat permafrost microbial communities from Stordalen Mire near Abisko, Sweden	Environmental	Terrestrial	Soil	Peat	Permafrost	68.3535	19.0473	343406	110462	2933	16
BlaSpr_A8_OM1_M2_FD	Forest soil microbial communities from multiple locations in Canada and USA	Environmental	Terrestrial	Soil	Loam	Forest soil	49.08	-89.38	122574	30856	87	0
MicForSoiBWC30_M_FD	Forest soil microbial communities from Harvard Forest Long Term Ecological Research (LTER) site in Petersham, MA, for long-term soil warming studies	Environmental	Terrestrial	Soil	Loam	Forest soil	42.4711	-72.1726	26343	7057	0	0
SF_Rice_5C_80N_1_FD	Natural and restored wetland microbial communities from the San Francisco Bay, California, USA, that impact long-term carbon sequestration	Environmental	Terrestrial	Soil	Unclassified	Agricultural land	38.1087	-121.653	54638	13061	12	0
CNK18_metaG_FD	Soil microbial communities from Purdue University Martell Research Forest, Indiana, United States	Environmental	Terrestrial	Soil	Unclassified	Forest Soil	40.4449	-87.0297	76021	18278	37	0
UWRJL184509B5_FD	Soil microbial communities from Arlington Agricultural Research Station in Wisconsin and Kellogg Biological Station in Michigan, replicating the bioenergy cropping systems trials (BCSTs)	Environmental	Terrestrial	Plant litter	Unclassified	Unclassified	43.3	-89.38	111945	46256	803	1
PersoiDNA2013191_FD	Permafrost soil microbial communities from the Arctic, to analyse light accelerated degradation of dissolved organic matter (DOM)	Environmental	Terrestrial	Soil	Wetlands	Permafrost	68.6137	-149.314	128322	43748	585	0
BlaSpr_A8_Ref_O1_FD	Forest soil microbial communities from multiple locations in Canada and USA	Environmental	Terrestrial	Soil	Loam	Forest soil	49.08	-89.38	235431	71500	1550	0
MayberryNE_TuleC_2_FD	Natural and restored wetland microbial communities from the San Francisco Bay, California, USA, that impact long-term carbon sequestration	Environmental	Terrestrial	Soil	Wetlands	Unclassified	38.0525	-121.769	27630	5228	7	0
NitcycUWG10A5w12_FD	Soil microbial communities from Arlington Agricultural Research Station in Wisconsin and Kellogg Biological Station in Michigan, replicating the bioenergy cropping systems trials (BCSTs)	Environmental	Terrestrial	Soil	Unclassified	Agricultural land	43.3	-89.38	4646	583	0	0
MetcocultureR2M_FD	Systems level insights into methane cycling in arid and semi-arid ecosystems	Environmental	Terrestrial	Soil	Unclassified	Desert	33.0544	-116.358	6771	1898	195	0
MedBloCAOM2_M1_FD	Forest soil microbial communities from multiple locations in Canada and USA	Environmental	Terrestrial	Soil	Loam	Forest soil	38.88	-120.64	76901	17357	3	0
GraSoiAngelo_148_FD	Grasslands soil microbial communities from the Angelo Coastal Reserve, California, USA	Environmental	Terrestrial	Soil	Unclassified	Grasslands	39.7392	-123.631	455572	165538	2839	0
OrgsoiDNA_201062_FD	Permafrost soil microbial communities from the Arctic, to analyse light accelerated degradation of dissolved organic matter (DOM)	Environmental	Terrestrial	Soil	Wetlands	Permafrost	68.6137	-149.314	101467	30226	828	0
713E3MmetaG_FD	Peatland microbial communities from Stordalen Mire, Sweden	Environmental	Terrestrial	Soil	Peat	Mire	68.3533	19.0467	141227	42341	883	1
713E2MmetaG_FD	Peatland microbial communities from Stordalen Mire, Sweden	Environmental	Terrestrial	Soil	Peat	Mire	68.3533	19.0466	112438	32815	131	0
BlaSpr_A8_OM1_M3_FD	Forest soil microbial communities from multiple locations in Canada and USA	Environmental	Terrestrial	Soil	Loam	Forest soil	49.08	-89.38	227608	75671	1055	0
13C_Glucose_Day1_FD	Soil microbial communities from agricultural site in Penn Yan, New York, United States	Environmental	Terrestrial	Soil	Unclassified	Agricultural land	42.673	-77.032	1429378	342546	3601	0
MicForSoSWNC19_O_FD	Forest soil microbial communities from Harvard Forest Long Term Ecological Research (LTER) site in Petersham, MA, for long-term soil warming studies	Environmental	Terrestrial	Soil	Loam	Forest soil	42.533	-72.2095	19730	2533	0	0
BlaSpr_A8_OM2_M2_FD	Forest soil microbial communities from multiple locations in Canada and USA	Environmental	Terrestrial	Soil	Loam	Forest soil	49.08	-89.38	202719	70082	1075	0
Subbioug_CSW11AC_FD	Serpentinite rock and fluid microbial communities from Tablelands Ophiolite (Newfoundland), Coast Range Ophiolite (California) and Ligurian Springs (Italy)	Environmental	Terrestrial	Deep subsurface	Unclassified	Unclassified	38.874	-122.439	1796	1049	173	0
714S22024metaG_FD	Peatland microbial communities from Stordalen Mire, Sweden	Environmental	Terrestrial	Soil	Peat	Mire	68.3532	19.0474	152937	56551	2361	0
Poulit2012_FD	Agricultural soil microbial communities from Utah and Georgia to study Nitrogen management	Environmental	Terrestrial	Soil	Unclassified	Unclassified	33.8834	-83.4195	183330	115299	5010	0
tim00Cox0000000H_FD	Lab enrichment of tropical soil microbial communities from Luquillo Experimental Forest, Puerto Rico	Environmental	Terrestrial	Soil	Unclassified	Forest Soil	18.321	-65.8172	1582825	455836	2136	0
NitcycUWRG05A210_FD	Soil microbial communities from Arlington Agricultural Research Station in Wisconsin and Kellogg Biological Station in Michigan, replicating the bioenergy cropping systems trials (BCSTs)	Environmental	Terrestrial	Soil	Unclassified	Agricultural land	43.3	-89.38	3904	470	0	0
UWRJL096311B4_FD	Soil microbial communities from Arlington Agricultural Research Station in Wisconsin and Kellogg Biological Station in Michigan, replicating the bioenergy cropping systems trials (BCSTs)	Environmental	Terrestrial	Plant litter	Unclassified	Unclassified	43.3	-89.38	151846	34918	90	0
GraSoiAngelo_128_FD	Grasslands soil microbial communities from the Angelo Coastal Reserve, California, USA	Environmental	Terrestrial	Soil	Unclassified	Grasslands	39.7392	-123.631	337579	142426	2786	0
13C_Xylose_Day6_FD	Soil microbial communities from agricultural site in Penn Yan, New York, United States	Environmental	Terrestrial	Soil	Unclassified	Agricultural land	42.673	-77.032	1140923	235698	2254	0
GWRWS3_10_20_FD	Groundwater microbial communities from the Columbia River, Washington, USA	Environmental	Terrestrial	Soil	Sand	Unclassified	46.372	-119.272	97438	31442	243	0
WestPond_TuleB_D_2_FD	Natural and restored wetland microbial communities from the San Francisco Bay, California, USA, that impact long-term carbon sequestration	Environmental	Terrestrial	Soil	Wetlands	Unclassified	38.1075	-121.65	15035	2251	11	3
ForSoiNitroNN626_FD	Soil microbial communities from 10 grassland sites in CA, CO, KS, KY, MN, MO, NM, SC, TX, that have been nitrogen fertilized	Environmental	Terrestrial	Soil	Loam	Grasslands	39.05	-99.1	2446	338	0	0
SF_Rice_25C_0N_1_FD	Natural and restored wetland microbial communities from the San Francisco Bay, California, USA, that impact long-term carbon sequestration	Environmental	Terrestrial	Soil	Unclassified	Agricultural land	38.1087	-121.653	25673	3640	0	0
OWC_May_M1_C1_D6_FD	Wetland microbial communities from Old Woman Creek delta, Ohio, USA	Environmental	Terrestrial	Soil	Wetlands	Unclassified	41.3776	-82.5117	2297105	495023	1027	0
NitcycUWG05A1w12_FD	Soil microbial communities from Arlington Agricultural Research Station in Wisconsin and Kellogg Biological Station in Michigan, replicating the bioenergy cropping systems trials (BCSTs)	Environmental	Terrestrial	Soil	Unclassified	Agricultural land	43.3	-89.38	4506	621	0	0
LuqExpMetageno19_FD	Tropical forest soil microbial communities from Luquillo Experimental Forest, Puerto Rico	Environmental	Terrestrial	Soil	Loam	Forest soil	18	-65	21309	6120	94	0
Wag4S2015_5_14_FD	Deep subsurface shale carbon reservoir microbial communities from Ohio and West Virginia, USA	Environmental	Terrestrial	Deep subsurface	Fracking water	Shale carbon reservoir	40.178	-81.073	1342	793	150	0
SalPon2A_B_D1_MG_FD	Salt pond water, soil and salt crust microbial communities from South San Francisco under conditions of wetland restoration.	Environmental	Terrestrial	Soil	Wetlands	Unclassified	37.496	-122.133	64488	12303	3	0
LuqExpMetagenom8_FD	Tropical forest soil microbial communities from Luquillo Experimental Forest, Puerto Rico	Environmental	Terrestrial	Soil	Loam	Forest soil	18	-65	52998	14964	242	0
MicForSoiBWH19_M_FD	Forest soil microbial communities from Harvard Forest Long Term Ecological Research (LTER) site in Petersham, MA, for long-term soil warming studies	Environmental	Terrestrial	Soil	Loam	Forest soil	42.4711	-72.1726	3867	659	0	0
CNK24_metaG_FD	Soil microbial communities from Purdue University Martell Research Forest, Indiana, United States	Environmental	Terrestrial	Soil	Unclassified	Forest Soil	40.4449	-87.0297	31235	6549	36	0
NGESurdeep092012_8_FD	Arctic peat soil microbial communities from the Barrow Environmental Observatory site, Barrow, Alaska, USA	Environmental	Terrestrial	Soil	Unclassified	Permafrost	71.2999	-156.61	123908	41903	1187	0
RVTome_8_FD	Soil microbial communities from uranium-contaminated sites across the Upper Colorado River Basin region	Environmental	Terrestrial	Soil	Unclassified	Uranium contaminated	42.9888	-108.399	329818	62901	744	0
MicForSoilPHH6_M_FD	Forest soil microbial communities from Harvard Forest Long Term Ecological Research (LTER) site in Petersham, MA, for long-term soil warming studies	Environmental	Terrestrial	Soil	Loam	Forest soil	42.5504	-72.1802	48676	10251	1	0
GraSoiAngelo_126_FD	Grasslands soil microbial communities from the Angelo Coastal Reserve, California, USA	Environmental	Terrestrial	Soil	Loam	Grasslands	39.7392	-123.631	233482	101140	1917	0
GraSoiAngelo_140_FD	Grasslands soil microbial communities from the Angelo Coastal Reserve, California, USA	Environmental	Terrestrial	Soil	Unclassified	Grasslands	39.7392	-123.631	371200	117307	3015	0
III_Bog_N3_2_FD	Peat permafrost microbial communities from Stordalen Mire near Abisko, Sweden	Environmental	Terrestrial	Soil	Peat	Bog	68.3532	19.0477	521258	198314	7532	0
Subbioar_CSW14AB_FD	Serpentinite rock and fluid microbial communities from Tablelands Ophiolite (Newfoundland), Coast Range Ophiolite (California) and Ligurian Springs (Italy)	Environmental	Terrestrial	Deep subsurface	Unclassified	Unclassified	38.874	-122.439	96067	37910	2203	0
NitcycUWRROWE15B_FD	Soil microbial communities from Arlington Agricultural Research Station in Wisconsin and Kellogg Biological Station in Michigan, replicating the bioenergy cropping systems trials (BCSTs)	Environmental	Terrestrial	Soil	Unclassified	Agricultural land	43.42	-89.33	2190	177	0	0
NGESurdeep072012_8_FD	Arctic peat soil microbial communities from the Barrow Environmental Observatory site, Barrow, Alaska, USA	Environmental	Terrestrial	Soil	Unclassified	Permafrost	71.2999	-156.61	160558	61594	1669	0
NitcycUWG012K212_FD	Soil microbial communities from Arlington Agricultural Research Station in Wisconsin and Kellogg Biological Station in Michigan, replicating the bioenergy cropping systems trials (BCSTs)	Environmental	Terrestrial	Soil	Unclassified	Agricultural land	43.3	-89.38	4663	299	3	0
BlaSpr_A8_OM3_M3_FD	Forest soil microbial communities from multiple locations in Canada and USA	Environmental	Terrestrial	Soil	Loam	Forest soil	49.08	-89.38	204634	61412	734	0
CBST25metaG_FD	Peatland microbial communities from Stordalen Mire, Sweden	Environmental	Terrestrial	Soil	Peat	Mire	68.3529	19.0475	106169	37775	1173	0
I_Bog_E1_3_FD	Peat permafrost microbial communities from Stordalen Mire near Abisko, Sweden	Environmental	Terrestrial	Soil	Peat	Bog	68.3532	19.0477	282727	82303	817	0
III_Palsa_N3_2_FD	Peat permafrost microbial communities from Stordalen Mire near Abisko, Sweden	Environmental	Terrestrial	Soil	Peat	Permafrost	68.3535	19.0473	475845	142625	3868	4
SoimicmetaGmgHPC_FD	Soil and rhizosphere microbial communities from Centre INRS-Institut Armand-Frappier, Laval, Canada	Environmental	Terrestrial	Soil	Unclassified	Unclassified	45.54	-73.72	6962	705	0	0
ForSoiNitrNN1104_FD	Soil microbial communities from 10 grassland sites in CA, CO, KS, KY, MN, MO, NM, SC, TX, that have been nitrogen fertilized	Environmental	Terrestrial	Soil	Loam	Grasslands	40.8167	-104.767	464	59	0	0
OrgsoiDNA_201060_FD	Permafrost soil microbial communities from the Arctic, to analyse light accelerated degradation of dissolved organic matter (DOM)	Environmental	Terrestrial	Soil	Wetlands	Permafrost	68.6137	-149.314	112693	29812	1113	0
Joice_CattailNLB_2_FD	Natural and restored wetland microbial communities from the San Francisco Bay, California, USA, that impact long-term carbon sequestration	Environmental	Terrestrial	Soil	Wetlands	Unclassified	38.1971	-122.01	26444	6171	19	0
UWRJL044104R1_FD	Soil microbial communities from Arlington Agricultural Research Station in Wisconsin and Kellogg Biological Station in Michigan, replicating the bioenergy cropping systems trials (BCSTs)	Environmental	Terrestrial	Plant litter	Unclassified	Unclassified	43.3	-89.38	359674	112483	1846	0
SoimicmetaGmgHMA_FD	Soil and rhizosphere microbial communities from Centre INRS-Institut Armand-Frappier, Laval, Canada	Environmental	Terrestrial	Soil	Unclassified	Unclassified	45.54	-73.72	4901	509	0	0
TexAe_RefH0_O2_FD	Forest soil microbial communities from multiple locations in Canada and USA	Environmental	Terrestrial	Soil	Loam	Forest soil	31.11	-95.15	53453	12098	46	0
SF_Rice_5C_0N_20_FD	Natural and restored wetland microbial communities from the San Francisco Bay, California, USA, that impact long-term carbon sequestration	Environmental	Terrestrial	Soil	Unclassified	Agricultural land	38.1087	-121.653	28305	4859	1	0
NGESurshal092012_FD	Arctic peat soil microbial communities from the Barrow Environmental Observatory site, Barrow, Alaska, USA	Environmental	Terrestrial	Soil	Unclassified	Permafrost	71.2999	-156.61	91199	30521	1073	0
I_Palsa_E3_3_FD	Peat permafrost microbial communities from Stordalen Mire near Abisko, Sweden	Environmental	Terrestrial	Soil	Peat	Permafrost	68.3535	19.0473	520041	177594	3972	0
NitcycUWRG05A110_FD	Soil microbial communities from Arlington Agricultural Research Station in Wisconsin and Kellogg Biological Station in Michigan, replicating the bioenergy cropping systems trials (BCSTs)	Environmental	Terrestrial	Soil	Unclassified	Agricultural land	43.3	-89.38	5105	686	0	0
QUI85_MG_FD	Tropical peatland microbial communities from different locations	Environmental	Terrestrial	Soil	Wetlands	Unclassified	-3.8385	-73.3213	1259806	443278	5915	0
ForSoiNitroNN349_FD	Soil microbial communities from 10 grassland sites in CA, CO, KS, KY, MN, MO, NM, SC, TX, that have been nitrogen fertilized	Environmental	Terrestrial	Soil	Loam	Grasslands	35.913	-79.056	3041	343	1	0
EtOH5_35cm_T3_12_FD	Methane metabolizing microbial communities from different methane-rich environments from various locations	Environmental	Terrestrial	Soil	Sand	Unclassified	49.2598	-123.246	43537	14582	1520	103
II_Bog_N1_3_FD	Peat permafrost microbial communities from Stordalen Mire near Abisko, Sweden	Environmental	Terrestrial	Soil	Peat	Bog	68.3532	19.0477	507526	197874	6844	9
II_Palsa_N1_3_FD	Peat permafrost microbial communities from Stordalen Mire near Abisko, Sweden	Environmental	Terrestrial	Soil	Peat	Permafrost	68.3535	19.0473	567564	171478	4085	0
NitcycUWRG07A510_FD	Soil microbial communities from Arlington Agricultural Research Station in Wisconsin and Kellogg Biological Station in Michigan, replicating the bioenergy cropping systems trials (BCSTs)	Environmental	Terrestrial	Soil	Unclassified	Agricultural land	43.3	-89.38	27543	4260	1	0
NitcycUWRSCHO21C_FD	Soil microbial communities from Arlington Agricultural Research Station in Wisconsin and Kellogg Biological Station in Michigan, replicating the bioenergy cropping systems trials (BCSTs)	Environmental	Terrestrial	Soil	Unclassified	Agricultural land	43.3	-89.38	4683	665	0	0
JacPinW_OM1H0_O3_FD	Forest soil microbial communities from multiple locations in Canada and USA	Environmental	Terrestrial	Soil	Loam	Forest soil	46.42	-83.37	146397	33971	33	0
III_Fen_E2_4_FD	Peat permafrost microbial communities from Stordalen Mire near Abisko, Sweden	Environmental	Terrestrial	Soil	Peat	Fen	68.3532	19.0469	272700	67876	1299	11
LARL112metaG_FD	Corn, switchgrass and miscanthus rhizosphere microbial communities from Kellogg Biological Station, Michigan, USA	Environmental	Terrestrial	Soil	Loam	Agricultural soil	42.4774	-85.451	1699883	439275	3877	0
NitcycUWG05A5w12_FD	Soil microbial communities from Arlington Agricultural Research Station in Wisconsin and Kellogg Biological Station in Michigan, replicating the bioenergy cropping systems trials (BCSTs)	Environmental	Terrestrial	Soil	Unclassified	Agricultural land	43.3	-89.38	13079	1711	0	0
LuqExpMetageno57_FD	Tropical forest soil microbial communities from Luquillo Experimental Forest, Puerto Rico	Environmental	Terrestrial	Soil	Loam	Forest soil	18	-65	27380	8493	204	0
NitcycUWRSCHO22E_FD	Soil microbial communities from Arlington Agricultural Research Station in Wisconsin and Kellogg Biological Station in Michigan, replicating the bioenergy cropping systems trials (BCSTs)	Environmental	Terrestrial	Soil	Unclassified	Agricultural land	43.3	-89.38	3015	278	0	0
LuqExpMetageno51_FD	Tropical forest soil microbial communities from Luquillo Experimental Forest, Puerto Rico	Environmental	Terrestrial	Soil	Loam	Forest soil	18	-65	32729	10324	256	0
MedBloCAOM1_O3_FD	Forest soil microbial communities from multiple locations in Canada and USA	Environmental	Terrestrial	Soil	Loam	Forest soil	38.88	-120.64	138674	34238	139	0
GAControl_FD	Agricultural soil microbial communities from Utah and Georgia to study Nitrogen management	Environmental	Terrestrial	Soil	Unclassified	Agricultural land	33.8834	-83.4195	172946	79230	97	0
DW10A_FD	Soil microbial communities from H.J. Andrews Experimental Forest, Oregon, United States	Environmental	Terrestrial	Soil	Unclassified	Forest Soil	44.23	-122.22	126606	37519	94	0
I_Fen_E1_4_FD	Peat permafrost microbial communities from Stordalen Mire near Abisko, Sweden	Environmental	Terrestrial	Soil	Peat	Fen	68.3532	19.0469	414308	111732	466	0
714E13034metaG_FD	Peatland microbial communities from Stordalen Mire, Sweden	Environmental	Terrestrial	Soil	Peat	Mire	68.3532	19.0469	142821	46619	628	0
CSU1metagenome_FD	Soil, plant litter and rhizosphere microbial communities from European coniferous forests	Environmental	Terrestrial	Soil	Unclassified	Unclassified	49.043	13.6183	14360	3622	5	0
JacPinW_OM1H0_O2_FD	Forest soil microbial communities from multiple locations in Canada and USA	Environmental	Terrestrial	Soil	Loam	Forest soil	46.42	-83.37	192794	56004	840	0
Palsa_T0_3_FD	Peat permafrost microbial communities from Stordalen Mire near Abisko, Sweden	Environmental	Terrestrial	Soil	Peat	Permafrost	68.3532	19.0477	3746717	1283453	34644	1
ForSoiNitroNN391_FD	Soil microbial communities from 10 grassland sites in CA, CO, KS, KY, MN, MO, NM, SC, TX, that have been nitrogen fertilized	Environmental	Terrestrial	Soil	Loam	Forest soil	44.2052	-122.128	2286	259	0	0
GWRWS2_20_30_FD	Groundwater microbial communities from the Columbia River, Washington, USA	Environmental	Terrestrial	Soil	Sand	Unclassified	46.372	-119.272	46750	10446	36	0
TexAe_OM2H0_M1_FD	Forest soil microbial communities from multiple locations in Canada and USA	Environmental	Terrestrial	Soil	Loam	Forest soil	31.11	-95.15	107533	25960	6	0
LuqExpMetageno76_FD	Tropical forest soil microbial communities from Luquillo Experimental Forest, Puerto Rico	Environmental	Terrestrial	Soil	Loam	Forest soil	18	-65	22633	6835	148	0
NitcycUWRG10A111_FD	Soil microbial communities from Arlington Agricultural Research Station in Wisconsin and Kellogg Biological Station in Michigan, replicating the bioenergy cropping systems trials (BCSTs)	Environmental	Terrestrial	Soil	Unclassified	Agricultural land	43.2958	-89.3799	5427	1865	1	0
GWRWN3_0_10_FD	Groundwater microbial communities from the Columbia River, Washington, USA	Environmental	Terrestrial	Soil	Sand	Unclassified	46.372	-119.272	23001	4331	17	0
sta12Cox44000082_FD	Lab enrichment of tropical soil microbial communities from Luquillo Experimental Forest, Puerto Rico	Environmental	Terrestrial	Soil	Unclassified	Forest Soil	18.321	-65.8172	2428889	781287	8431	1
Methanotroph_Enr_FD	Deep subsurface shale carbon reservoir microbial communities from Ohio and West Virginia, USA	Environmental	Terrestrial	Deep subsurface	Fracking water	Shale carbon reservoir	41.3769	-82.5172	101866	39579	1953	0
NLE1metagenome_FD	Soil, plant litter and rhizosphere microbial communities from European coniferous forests	Environmental	Terrestrial	Plant litter	Unclassified	Unclassified	59.9979	10.7895	4246	539	1	0
MHFenrmetagenome_2_FD	Lab enriched peat soil microbial communities from two peatlands near Ithaca, NY, United States	Environmental	Terrestrial	Soil	Peat	Fen	42.3286	-76.4792	2514756	670582	7123	0
ER_DNA_123_FD	Soil microbial communities from the East River watershed near Crested Butte, Colorado, United States	Environmental	Terrestrial	Soil	Bulk soil	Meadow	38.9206	-106.949	499356	119402	338	0
GWRWS3_20_30_FD	Groundwater microbial communities from the Columbia River, Washington, USA	Environmental	Terrestrial	Soil	Sand	Unclassified	46.372	-119.272	75671	23590	153	0
NitcycUWRHINK08C_FD	Soil microbial communities from Arlington Agricultural Research Station in Wisconsin and Kellogg Biological Station in Michigan, replicating the bioenergy cropping systems trials (BCSTs)	Environmental	Terrestrial	Soil	Unclassified	Agricultural land	43.42	-89.4	488	49	0	0
GraSoiAngelo_137_FD	Grasslands soil microbial communities from the Angelo Coastal Reserve, California, USA	Environmental	Terrestrial	Soil	Unclassified	Grasslands	39.7392	-123.631	337272	141291	3332	0
NitcycUWG05A4w12_FD	Soil microbial communities from Arlington Agricultural Research Station in Wisconsin and Kellogg Biological Station in Michigan, replicating the bioenergy cropping systems trials (BCSTs)	Environmental	Terrestrial	Soil	Unclassified	Agricultural land	43.3	-89.38	5539	621	0	0
Subbio2Mar_QV11C_FD	Serpentinite rock and fluid microbial communities from Tablelands Ophiolite (Newfoundland), Coast Range Ophiolite (California) and Ligurian Springs (Italy)	Environmental	Terrestrial	Deep subsurface	Unclassified	Unclassified	38.874	-122.439	3669	1965	267	0
GRESIP108b1f25_FD	Lab enrichment of tropical soil microbial communities from Luquillo Experimental Forest, Puerto Rico	Environmental	Terrestrial	Soil	Unclassified	Forest Soil	18.321	-65.8172	554276	164769	871	0
UWRJS076202R6_FD	Soil microbial communities from Arlington Agricultural Research Station in Wisconsin and Kellogg Biological Station in Michigan, replicating the bioenergy cropping systems trials (BCSTs)	Environmental	Terrestrial	Soil	Unclassified	Agricultural land	43.3	-89.38	103319	17024	12	0
BlaSpr_A8_OM2_O3_FD	Forest soil microbial communities from multiple locations in Canada and USA	Environmental	Terrestrial	Soil	Loam	Forest soil	49.08	-89.38	218311	65213	1779	0
GEONSFMMS2_FD	Soil and plant litter microbial communities from temperate forests in California, United States	Environmental	Terrestrial	Soil	Unclassified	Forest Soil	40.3809	-123.413	59713	10666	3	0
LuqExpMetageno18_FD	Tropical forest soil microbial communities from Luquillo Experimental Forest, Puerto Rico	Environmental	Terrestrial	Soil	Loam	Forest soil	18	-65	47083	14013	280	7
BulsoiFelSFmetaG_FD	Agave microbial communities from California, USA, and Mexico	Environmental	Terrestrial	Soil	Unclassified	Unclassified	21.766	-100.163	161937	26951	227	0
RushSE_TuleC_D1_FD	Natural and restored wetland microbial communities from the San Francisco Bay, California, USA, that impact long-term carbon sequestration	Environmental	Terrestrial	Soil	Wetlands	Unclassified	38.2245	-122.019	36405	7094	2	0
II_Bog_N2_1_FD	Peat permafrost microbial communities from Stordalen Mire near Abisko, Sweden	Environmental	Terrestrial	Soil	Peat	Bog	68.3532	19.0477	551024	179762	6204	11
NitcycUWRG10K212_FD	Soil microbial communities from Arlington Agricultural Research Station in Wisconsin and Kellogg Biological Station in Michigan, replicating the bioenergy cropping systems trials (BCSTs)	Environmental	Terrestrial	Soil	Unclassified	Agricultural land	43.3	-89.38	4794	303	0	0
SF_Rice_25C_80N__3_FD	Natural and restored wetland microbial communities from the San Francisco Bay, California, USA, that impact long-term carbon sequestration	Environmental	Terrestrial	Soil	Unclassified	Agricultural land	38.1087	-121.653	10586	1137	0	0
T20D1metaG_FD	Soil microbial communities from West Virginia University Organic Research Farm, Morgantown, WV, United States	Environmental	Terrestrial	Soil	Unclassified	Agricultural land	39.6475	-79.9369	1113841	247437	448	0
NitcycUWRG05K412_FD	Soil microbial communities from Arlington Agricultural Research Station in Wisconsin and Kellogg Biological Station in Michigan, replicating the bioenergy cropping systems trials (BCSTs)	Environmental	Terrestrial	Soil	Unclassified	Agricultural land	42.4	-85.37	4205	460	0	0
Lox_Sample_32_FD	Soil microbial communities from Loxahatchee National Wildlife Refuge, Florida, United States	Environmental	Terrestrial	Soil	Wetlands	Unclassified	26.5065	-80.2537	2751808	986611	19802	1
NGEPerD_2_FD	Arctic peat soil microbial communities from the Barrow Environmental Observatory site, Barrow, Alaska, USA	Environmental	Terrestrial	Soil	Unclassified	Permafrost	71.299	-156.61	219446	48181	1744	0
UWRJL208509C2_FD	Soil microbial communities from Arlington Agricultural Research Station in Wisconsin and Kellogg Biological Station in Michigan, replicating the bioenergy cropping systems trials (BCSTs)	Environmental	Terrestrial	Plant litter	Unclassified	Unclassified	43.3	-89.38	386268	140811	3412	0
MHFSIPfraction_4_FD	Lab enriched peat soil microbial communities from two peatlands near Ithaca, NY, United States	Environmental	Terrestrial	Soil	Peat	Fen	42.3286	-76.4792	91066	25750	417	0
JacPinW_OM2H0_O3_FD	Forest soil microbial communities from multiple locations in Canada and USA	Environmental	Terrestrial	Soil	Loam	Forest soil	46.42	-83.37	163811	45660	924	0
NitcycUWRG09A211_FD	Soil microbial communities from Arlington Agricultural Research Station in Wisconsin and Kellogg Biological Station in Michigan, replicating the bioenergy cropping systems trials (BCSTs)	Environmental	Terrestrial	Soil	Unclassified	Agricultural land	43.3	-89.38	6179	1229	0	0
OX2MG_FD	Soil microbial communities from Risofladan, Vaasa, Finland	Environmental	Terrestrial	Soil	Clay	Unclassified	63.0472	21.7116	690921	307913	16246	3
UWRJL074202C1_FD	Soil microbial communities from Arlington Agricultural Research Station in Wisconsin and Kellogg Biological Station in Michigan, replicating the bioenergy cropping systems trials (BCSTs)	Environmental	Terrestrial	Plant litter	Unclassified	Unclassified	43.3	-89.38	462392	136462	2519	1
LuqExpMetageno40_FD	Tropical forest soil microbial communities from Luquillo Experimental Forest, Puerto Rico	Environmental	Terrestrial	Soil	Loam	Forest soil	18	-65	59649	20969	344	0
OWC_soil_day5_CT_FD	Wetland soil microbial communities from various locations	Environmental	Terrestrial	Soil	Wetlands	Unclassified	41.3777	-82.5117	1388037	353968	1696	0
II_Palsa_N2_3_FD	Peat permafrost microbial communities from Stordalen Mire near Abisko, Sweden	Environmental	Terrestrial	Soil	Peat	Permafrost	68.3535	19.0473	695626	198905	3876	0
SoimicmetaGmgHAA_FD	Soil and rhizosphere microbial communities from Centre INRS-Institut Armand-Frappier, Laval, Canada	Environmental	Terrestrial	Soil	Unclassified	Unclassified	45.54	-73.72	7633	1469	59	0
UWRJL126311R4_FD	Soil microbial communities from Arlington Agricultural Research Station in Wisconsin and Kellogg Biological Station in Michigan, replicating the bioenergy cropping systems trials (BCSTs)	Environmental	Terrestrial	Plant litter	Unclassified	Unclassified	43.3	-89.38	334215	83926	2316	2
SoimicmetaGmgLPC_FD	Soil and rhizosphere microbial communities from Centre INRS-Institut Armand-Frappier, Laval, Canada	Environmental	Terrestrial	Soil	Unclassified	Unclassified	45.54	-73.72	113519	29209	179	0
GraSoiAngelo_127_FD	Grasslands soil microbial communities from the Angelo Coastal Reserve, California, USA	Environmental	Terrestrial	Soil	Unclassified	Grasslands	39.7392	-123.631	378316	146155	2842	0
NitcycUWG092A112_FD	Soil microbial communities from Arlington Agricultural Research Station in Wisconsin and Kellogg Biological Station in Michigan, replicating the bioenergy cropping systems trials (BCSTs)	Environmental	Terrestrial	Soil	Unclassified	Agricultural land	43.3	-89.38	11354	1332	1	0
BONnt4_FD	Terrestrial sediment cell enrichment communities for BONCAT metagenomics from Utah, United States	Environmental	Terrestrial	Geologic	Sediment	Unclassified	38.715	-109.691	47141	10506	114	0
LuqExpMetageno69_FD	Tropical forest soil microbial communities from Luquillo Experimental Forest, Puerto Rico	Environmental	Terrestrial	Soil	Loam	Forest soil	18	-65	8450	2847	0	0
Wag42014_10_12_FD	Deep subsurface shale carbon reservoir microbial communities from Ohio and West Virginia, USA	Environmental	Terrestrial	Deep subsurface	Fracking water	Shale carbon reservoir	40.178	-81.073	3761	2245	300	0
CSU2metagenome_FD	Soil, plant litter and rhizosphere microbial communities from European coniferous forests	Environmental	Terrestrial	Soil	Unclassified	Unclassified	49.044	13.617	29326	4362	148	0
III_Fen_E2_3_FD	Peat permafrost microbial communities from Stordalen Mire near Abisko, Sweden	Environmental	Terrestrial	Soil	Peat	Fen	68.3532	19.0469	750561	203233	3876	16
NitcycUWRG07K212_FD	Soil microbial communities from Arlington Agricultural Research Station in Wisconsin and Kellogg Biological Station in Michigan, replicating the bioenergy cropping systems trials (BCSTs)	Environmental	Terrestrial	Soil	Unclassified	Agricultural land	42.4	-85.37	1813	112	0	0
NitcycUWRG05A412_FD	Soil microbial communities from Arlington Agricultural Research Station in Wisconsin and Kellogg Biological Station in Michigan, replicating the bioenergy cropping systems trials (BCSTs)	Environmental	Terrestrial	Soil	Unclassified	Agricultural land	43.3	-89.38	6027	792	0	0
NitcycUWRG08A112_FD	Soil microbial communities from Arlington Agricultural Research Station in Wisconsin and Kellogg Biological Station in Michigan, replicating the bioenergy cropping systems trials (BCSTs)	Environmental	Terrestrial	Soil	Unclassified	Agricultural land	43.3	-89.38	3939	476	0	0
MedBloCAOM1_M2_FD	Forest soil microbial communities from multiple locations in Canada and USA	Environmental	Terrestrial	Soil	Loam	Forest soil	38.88	-120.64	112793	31572	50	0
PFST25metaG_FD	Peatland microbial communities from Stordalen Mire, Sweden	Environmental	Terrestrial	Soil	Peat	Mire	68.3533	19.0466	62495	16638	445	0
714E115metaG_2_FD	Peatland microbial communities from Stordalen Mire, Sweden	Environmental	Terrestrial	Soil	Peat	Mire	68.3533	19.0467	73928	15679	237	0
LuqExpMetageno28_FD	Tropical forest soil microbial communities from Luquillo Experimental Forest, Puerto Rico	Environmental	Terrestrial	Soil	Loam	Forest soil	18	-65	41688	14798	212	0
OWC_Aug_N3_C1_D5_FD	Wetland microbial communities from Old Woman Creek delta, Ohio, USA	Environmental	Terrestrial	Soil	Wetlands	Unclassified	41.3776	-82.512	2324121	545563	1208	0
flu12Cox44000176_FD	Lab enrichment of tropical soil microbial communities from Luquillo Experimental Forest, Puerto Rico	Environmental	Terrestrial	Soil	Unclassified	Forest Soil	18.321	-65.8172	2288689	772283	7974	1
GREbulkMGHF172_FD	Lab enrichment of tropical soil microbial communities from Luquillo Experimental Forest, Puerto Rico	Environmental	Terrestrial	Soil	Unclassified	Forest Soil	18.321	-65.8172	1592159	468802	2766	0
Man_PB_2_FD	Subsurface microbial communities from deep shales in Ohio and West Virginia, USA	Environmental	Terrestrial	Geologic	Sediment	Unclassified	38.96	-106.99	44295	7192	8	0
I_Palsa_E1_3_FD	Peat permafrost microbial communities from Stordalen Mire near Abisko, Sweden	Environmental	Terrestrial	Soil	Peat	Permafrost	68.3535	19.0473	548101	188471	4598	0
714E21014metaG_FD	Peatland microbial communities from Stordalen Mire, Sweden	Environmental	Terrestrial	Soil	Peat	Mire	68.3533	19.0468	28738	4570	4	0
714S31014metaG_FD	Peatland microbial communities from Stordalen Mire, Sweden	Environmental	Terrestrial	Soil	Peat	Mire	68.3532	19.0475	308877	123690	4580	0
MAQ_100_20_MG_FD	Tropical peatland microbial communities from different locations	Environmental	Terrestrial	Soil	Wetlands	Unclassified	-6.3272	-74.8136	179487	48058	288	0
PFST50metaG_FD	Peatland microbial communities from Stordalen Mire, Sweden	Environmental	Terrestrial	Soil	Peat	Mire	68.3533	19.0466	7632	2478	104	0
NitcycUWRG06K512_FD	Soil microbial communities from Arlington Agricultural Research Station in Wisconsin and Kellogg Biological Station in Michigan, replicating the bioenergy cropping systems trials (BCSTs)	Environmental	Terrestrial	Soil	Unclassified	Agricultural land	43.3	-89.38	3556	205	0	0
SF_Rice_25C_0N_3_FD	Natural and restored wetland microbial communities from the San Francisco Bay, California, USA, that impact long-term carbon sequestration	Environmental	Terrestrial	Soil	Unclassified	Agricultural land	38.1087	-121.653	20157	1807	0	0
GFST25metaG_2_FD	Peatland microbial communities from Stordalen Mire, Sweden	Environmental	Terrestrial	Soil	Peat	Mire	68.3533	19.0466	75364	19988	169	0
KBSC83BmetaG_FD	Corn, switchgrass and miscanthus rhizosphere microbial communities from Kellogg Biological Station, Michigan, USA	Environmental	Terrestrial	Soil	Loam	Agricultural soil	42.3948	-85.3738	1670402	532479	6773	0
GraSoiAngelo_124_FD	Grasslands soil microbial communities from the Angelo Coastal Reserve, California, USA	Environmental	Terrestrial	Soil	Unclassified	Grasslands	39.7392	-123.631	506367	184847	4605	0
UWRJL197509C6_FD	Soil microbial communities from Arlington Agricultural Research Station in Wisconsin and Kellogg Biological Station in Michigan, replicating the bioenergy cropping systems trials (BCSTs)	Environmental	Terrestrial	Plant litter	Unclassified	Unclassified	43.3	-89.38	271052	77313	766	0
SalPon2A_A_D1_MG_FD	Salt pond water, soil and salt crust microbial communities from South San Francisco under conditions of wetland restoration.	Environmental	Terrestrial	Soil	Wetlands	Unclassified	37.4962	-122.133	121046	33089	216	0
Man_PB_FD	Subsurface microbial communities from deep shales in Ohio and West Virginia, USA	Environmental	Terrestrial	Geologic	Sediment	Unclassified	38.96	-106.99	10034	1747	9	0
24E_DmetaG_FD	Soil microbial communities from hillslopes of Landscape Evolution Observatory, University of Arizona, Oracle, AZ, United States	Environmental	Terrestrial	Soil	Unclassified	Unclassified	32.5788	-110.851	3748	769	0	0
S3v_20metaG_FD	Systems level insights into methane cycling in arid and semi-arid ecosystems	Environmental	Terrestrial	Soil	Sand	Desert	33.305	-116.255	335756	80375	988	0
GRESIP171b2f18_FD	Lab enrichment of tropical soil microbial communities from Luquillo Experimental Forest, Puerto Rico	Environmental	Terrestrial	Soil	Unclassified	Forest Soil	18.321	-65.8172	633934	156052	328	0
II_Fen_E2_4_FD	Peat permafrost microbial communities from Stordalen Mire near Abisko, Sweden	Environmental	Terrestrial	Soil	Peat	Fen	68.3532	19.0469	183792	47954	489	0
Rifsed13ft1_FD	Soil microbial communities from Rifle, Colorado, USA	Environmental	Terrestrial	Soil	Unclassified	Unclassified	39.53	-107.78	795312	266393	1584	7
NL11B_FD	Soil microbial communities from H.J. Andrews Experimental Forest, Oregon, United States	Environmental	Terrestrial	Soil	Unclassified	Forest Soil	44.23	-122.22	61632	11096	0	0
OrgsoiDNA_201059_FD	Permafrost soil microbial communities from the Arctic, to analyse light accelerated degradation of dissolved organic matter (DOM)	Environmental	Terrestrial	Soil	Wetlands	Permafrost	68.6137	-149.314	103811	31880	973	0
III_Bog_E1_2_FD	Peat permafrost microbial communities from Stordalen Mire near Abisko, Sweden	Environmental	Terrestrial	Soil	Peat	Bog	68.3532	19.0477	388396	130233	4912	5
II_Bog_E1_2_FD	Peat permafrost microbial communities from Stordalen Mire near Abisko, Sweden	Environmental	Terrestrial	Soil	Peat	Bog	68.3532	19.0477	338048	112038	4304	88
714E315metaG_FD	Peatland microbial communities from Stordalen Mire, Sweden	Environmental	Terrestrial	Soil	Peat	Mire	68.3533	19.0466	4404	192	0	0
KnobheadsudMG_FD	Rock endolithic microbial communities from Victoria Land, Antarctica	Environmental	Terrestrial	Rock-dwelling (endoliths)	Unclassified	Unclassified	-77.9	161.58	363703	180671	10851	9
713E2X0metaG_FD	Peatland microbial communities from Stordalen Mire, Sweden	Environmental	Terrestrial	Soil	Peat	Mire	68.3533	19.0466	79034	15334	354	2
CZO8metaG_2_FD	Vadose zone soil and rhizosphere microbial communities from the Eel River Critical Zone Observatory, Northern California to study diel carbon cycling	Environmental	Terrestrial	Soil	Vadose zone	Unclassified	39.7291	-123.642	572776	332140	2634	0
CNK31_metaG_FD	Soil microbial communities from Purdue University Martell Research Forest, Indiana, United States	Environmental	Terrestrial	Soil	Unclassified	Forest Soil	40.4449	-87.0297	49984	11726	385	0
MicForSoiPHDC3_O_FD	Forest soil microbial communities from Harvard Forest Long Term Ecological Research (LTER) site in Petersham, MA, for long-term soil warming studies	Environmental	Terrestrial	Soil	Loam	Forest soil	42.5504	-72.1802	16036	2793	0	0
NL11A_FD	Soil microbial communities from H.J. Andrews Experimental Forest, Oregon, United States	Environmental	Terrestrial	Soil	Unclassified	Forest Soil	44.23	-122.22	109569	22671	2	0
UWRJS171409R4_FD	Soil microbial communities from Arlington Agricultural Research Station in Wisconsin and Kellogg Biological Station in Michigan, replicating the bioenergy cropping systems trials (BCSTs)	Environmental	Terrestrial	Soil	Unclassified	Agricultural land	43.3	-89.38	230596	45562	491	0
II_Bog_N3_3_FD	Peat permafrost microbial communities from Stordalen Mire near Abisko, Sweden	Environmental	Terrestrial	Soil	Peat	Bog	68.3532	19.0477	576192	207117	8090	10
C0D4metaG_FD	Soil microbial communities from West Virginia University Organic Research Farm, Morgantown, WV, United States	Environmental	Terrestrial	Soil	Unclassified	Agricultural land	39.6475	-79.9369	789013	152335	417	0
ForSoiNitroNN339_FD	Soil microbial communities from 10 grassland sites in CA, CO, KS, KY, MN, MO, NM, SC, TX, that have been nitrogen fertilized	Environmental	Terrestrial	Soil	Loam	Grasslands	35.913	-79.056	18	4	0	0
LARL53metaG_FD	Corn, switchgrass and miscanthus rhizosphere microbial communities from Kellogg Biological Station, Michigan, USA	Environmental	Terrestrial	Soil	Loam	Agricultural soil	42.4774	-85.451	1752185	443978	1850	6
Sandmound_TuleA__FD	Natural and restored wetland microbial communities from the San Francisco Bay, California, USA, that impact long-term carbon sequestration	Environmental	Terrestrial	Soil	Wetlands	Unclassified	38.0007	-121.624	54666	10388	15	0
NGESurdeep072012_FD	Arctic peat soil microbial communities from the Barrow Environmental Observatory site, Barrow, Alaska, USA	Environmental	Terrestrial	Soil	Unclassified	Permafrost	71.2999	-156.61	115136	32058	573	0
RVTome_16_FD	Soil microbial communities from uranium-contaminated sites across the Upper Colorado River Basin region	Environmental	Terrestrial	Soil	Unclassified	Unclassified	42.9888	-108.399	1369224	469608	3562	0
MicForSoilBWC4_O_FD	Forest soil microbial communities from Harvard Forest Long Term Ecological Research (LTER) site in Petersham, MA, for long-term soil warming studies	Environmental	Terrestrial	Soil	Loam	Forest soil	42.4711	-72.1726	8935	1604	0	0
I_Bog_E2_2_FD	Peat permafrost microbial communities from Stordalen Mire near Abisko, Sweden	Environmental	Terrestrial	Soil	Peat	Bog	68.3532	19.0477	323372	87537	993	0
714E115metaG_FD	Peatland microbial communities from Stordalen Mire, Sweden	Environmental	Terrestrial	Soil	Peat	Mire	68.3532	19.0469	61551	14840	94	0
OWC_Aug_M1_C1_D3_FD	Wetland microbial communities from Old Woman Creek delta, Ohio, USA	Environmental	Terrestrial	Soil	Wetlands	Unclassified	41.3776	-82.5117	6476545	1450552	2250	2
Rifsed19ft3_FD	Soil microbial communities from Rifle, Colorado, USA	Environmental	Terrestrial	Soil	Unclassified	Unclassified	39.53	-107.78	846795	317094	4087	17
RushSE_TuleA_D1_FD	Natural and restored wetland microbial communities from the San Francisco Bay, California, USA, that impact long-term carbon sequestration	Environmental	Terrestrial	Soil	Wetlands	Unclassified	38.2245	-122.019	47789	10380	3	0
GEONDECOMP201_FD	Soil and plant litter microbial communities from temperate forests in California, United States	Environmental	Terrestrial	Plant litter	Unclassified	Unclassified	40.2526	-123.026	30843	7131	98	0
MicForSoilPHH8_M_FD	Forest soil microbial communities from Harvard Forest Long Term Ecological Research (LTER) site in Petersham, MA, for long-term soil warming studies	Environmental	Terrestrial	Soil	Loam	Forest soil	42.5504	-72.1802	35159	7085	0	0
GraSoiAngelo_107_FD	Grasslands soil microbial communities from the Angelo Coastal Reserve, California, USA	Environmental	Terrestrial	Soil	Unclassified	Grasslands	39.7392	-123.631	506390	120075	1284	0
MayberryNE_TuleA_FD	Natural and restored wetland microbial communities from the San Francisco Bay, California, USA, that impact long-term carbon sequestration	Environmental	Terrestrial	Soil	Wetlands	Unclassified	38.0525	-121.769	15715	2043	5	0
MetcocultureR1M_FD	Systems level insights into methane cycling in arid and semi-arid ecosystems	Environmental	Terrestrial	Soil	Unclassified	Desert	33.305	-116.255	9138	2672	55	0
CNK16_metaG_FD	Soil microbial communities from Purdue University Martell Research Forest, Indiana, United States	Environmental	Terrestrial	Soil	Unclassified	Forest Soil	40.4449	-87.0297	79803	18382	60	0
NLE2metagenome_FD	Soil, plant litter and rhizosphere microbial communities from European coniferous forests	Environmental	Terrestrial	Plant litter	Unclassified	Unclassified	59.9982	10.7894	9415	835	0	0
II_Fen_N1_4_FD	Peat permafrost microbial communities from Stordalen Mire near Abisko, Sweden	Environmental	Terrestrial	Soil	Peat	Fen	68.3532	19.0469	462128	130959	1184	0
NitcycUWRG09A510_FD	Soil microbial communities from Arlington Agricultural Research Station in Wisconsin and Kellogg Biological Station in Michigan, replicating the bioenergy cropping systems trials (BCSTs)	Environmental	Terrestrial	Soil	Unclassified	Agricultural land	43.3	-89.38	1497	52	0	0
ForSoiNitroNN621_FD	Soil microbial communities from 10 grassland sites in CA, CO, KS, KY, MN, MO, NM, SC, TX, that have been nitrogen fertilized	Environmental	Terrestrial	Soil	Loam	Grasslands	39.05	-99.1	1974	205	0	0
LuqExpMetagenom5_FD	Tropical forest soil microbial communities from Luquillo Experimental Forest, Puerto Rico	Environmental	Terrestrial	Soil	Loam	Forest soil	18	-65	43934	15212	845	0
GWRWN1_0_10_FD	Groundwater microbial communities from the Columbia River, Washington, USA	Environmental	Terrestrial	Soil	Sand	Unclassified	46.372	-119.272	127442	40113	616	0
MicForSoiPHDC5_O_FD	Forest soil microbial communities from Harvard Forest Long Term Ecological Research (LTER) site in Petersham, MA, for long-term soil warming studies	Environmental	Terrestrial	Soil	Loam	Forest soil	42.5504	-72.1802	14093	2198	0	0
RushMan_CattailN_4_FD	Natural and restored wetland microbial communities from the San Francisco Bay, California, USA, that impact long-term carbon sequestration	Environmental	Terrestrial	Soil	Wetlands	Unclassified	38.2099	-122.033	60109	13964	3	0
Rifsed19ft2_FD	Soil microbial communities from Rifle, Colorado, USA	Environmental	Terrestrial	Soil	Unclassified	Unclassified	39.53	-107.78	791941	302648	3826	16
LuqExpMetageno73_FD	Tropical forest soil microbial communities from Luquillo Experimental Forest, Puerto Rico	Environmental	Terrestrial	Soil	Loam	Forest soil	18	-65	39840	10787	263	0
HBST75metaG_FD	Peatland microbial communities from Stordalen Mire, Sweden	Environmental	Terrestrial	Soil	Peat	Mire	68.3529	19.0475	63798	28588	1669	0
GWRWS2_40_50_FD	Groundwater microbial communities from the Columbia River, Washington, USA	Environmental	Terrestrial	Soil	Sand	Unclassified	46.372	-119.272	61156	16146	101	0
NitcycUWRG08A410_FD	Soil microbial communities from Arlington Agricultural Research Station in Wisconsin and Kellogg Biological Station in Michigan, replicating the bioenergy cropping systems trials (BCSTs)	Environmental	Terrestrial	Soil	Unclassified	Agricultural land	43.3	-89.38	3343	169	0	0
GWRWN3_40_50_FD	Groundwater microbial communities from the Columbia River, Washington, USA	Environmental	Terrestrial	Soil	Sand	Unclassified	46.372	-119.272	40960	8173	108	0
JacPinW_OM2H0_M2_FD	Forest soil microbial communities from multiple locations in Canada and USA	Environmental	Terrestrial	Soil	Loam	Forest soil	46.42	-83.37	158760	44525	368	0
JacPin_JW_Ref_M1_FD	Forest soil microbial communities from multiple locations in Canada and USA	Environmental	Terrestrial	Soil	Loam	Forest soil	46.42	-83.37	18330	2410	4	0
NitcycUWRG07A112_FD	Soil microbial communities from Arlington Agricultural Research Station in Wisconsin and Kellogg Biological Station in Michigan, replicating the bioenergy cropping systems trials (BCSTs)	Environmental	Terrestrial	Soil	Unclassified	Agricultural land	43.3	-89.38	1980	98	0	0
NitcycUWRG05A411_FD	Soil microbial communities from Arlington Agricultural Research Station in Wisconsin and Kellogg Biological Station in Michigan, replicating the bioenergy cropping systems trials (BCSTs)	Environmental	Terrestrial	Soil	Unclassified	Agricultural land	43.3	-89.38	1042	40	0	0
NGEPer16B_FD	Arctic peat soil microbial communities from the Barrow Environmental Observatory site, Barrow, Alaska, USA	Environmental	Terrestrial	Soil	Unclassified	Permafrost	71.299	-156.61	201213	40191	360	0
GEONDECOMP225_FD	Soil and plant litter microbial communities from temperate forests in California, United States	Environmental	Terrestrial	Plant litter	Unclassified	Unclassified	40.2198	-122.984	27870	6503	252	0
II_Bog_E3_3_FD	Peat permafrost microbial communities from Stordalen Mire near Abisko, Sweden	Environmental	Terrestrial	Soil	Peat	Bog	68.3532	19.0477	660322	235620	5373	5
PanSoiPlot6MoBio_FD	Tropical forest soil microbial communities from Panama analyzed to predict greenhouse gas emissions	Environmental	Terrestrial	Soil	Loam	Forest soil	9.1086	-79.8436	84164	21249	253	0
NitcycUWRG09A412_FD	Soil microbial communities from Arlington Agricultural Research Station in Wisconsin and Kellogg Biological Station in Michigan, replicating the bioenergy cropping systems trials (BCSTs)	Environmental	Terrestrial	Soil	Unclassified	Agricultural land	43.3	-89.38	2722	162	0	0
ER_DNA_158_FD	Soil microbial communities from the East River watershed near Crested Butte, Colorado, United States	Environmental	Terrestrial	Soil	Bulk soil	Meadow	38.9206	-106.949	278334	66658	366	0
44W_DmetaG_FD	Soil microbial communities from hillslopes of Landscape Evolution Observatory, University of Arizona, Oracle, AZ, United States	Environmental	Terrestrial	Soil	Unclassified	Unclassified	32.5789	-110.851	9738	1335	0	0
ForSoiNitrNN1093_FD	Soil microbial communities from 10 grassland sites in CA, CO, KS, KY, MN, MO, NM, SC, TX, that have been nitrogen fertilized	Environmental	Terrestrial	Soil	Loam	Grasslands	40.8167	-104.767	225	21	0	0
NitcycUWRG01A110_FD	Soil microbial communities from Arlington Agricultural Research Station in Wisconsin and Kellogg Biological Station in Michigan, replicating the bioenergy cropping systems trials (BCSTs)	Environmental	Terrestrial	Soil	Unclassified	Agricultural land	43.2958	-89.3799	3220	123	0	0
NitcycUWRBECK01B_FD	Soil microbial communities from Arlington Agricultural Research Station in Wisconsin and Kellogg Biological Station in Michigan, replicating the bioenergy cropping systems trials (BCSTs)	Environmental	Terrestrial	Soil	Unclassified	Agricultural land	43.3	-89.38	6792	1225	2	0
DL02A_FD	Soil microbial communities from H.J. Andrews Experimental Forest, Oregon, United States	Environmental	Terrestrial	Soil	Unclassified	Forest Soil	44.23	-122.22	74450	16128	2	0
SalPonR2_B_D1_MG_FD	Salt pond water, soil and salt crust microbial communities from South San Francisco under conditions of wetland restoration.	Environmental	Terrestrial	Soil	Wetlands	Unclassified	37.4961	-122.133	178239	57296	646	0
GWRWN2_30_40_FD	Groundwater microbial communities from the Columbia River, Washington, USA	Environmental	Terrestrial	Soil	Sand	Unclassified	46.372	-119.272	25503	3654	21	0
OrgsoiDNA2013051_FD	Permafrost soil microbial communities from the Arctic, to analyse light accelerated degradation of dissolved organic matter (DOM)	Environmental	Terrestrial	Soil	Wetlands	Permafrost	68.6137	-149.314	70213	23409	801	0
NitcycUWRG01A410_FD	Soil microbial communities from Arlington Agricultural Research Station in Wisconsin and Kellogg Biological Station in Michigan, replicating the bioenergy cropping systems trials (BCSTs)	Environmental	Terrestrial	Soil	Unclassified	Agricultural land	43.2958	-89.3799	25255	4774	3	0
MicForSoiBWH30_O_FD	Forest soil microbial communities from Harvard Forest Long Term Ecological Research (LTER) site in Petersham, MA, for long-term soil warming studies	Environmental	Terrestrial	Soil	Loam	Forest soil	42.4711	-72.1726	17088	4132	0	0
NitcycUWRG07A310_FD	Soil microbial communities from Arlington Agricultural Research Station in Wisconsin and Kellogg Biological Station in Michigan, replicating the bioenergy cropping systems trials (BCSTs)	Environmental	Terrestrial	Soil	Unclassified	Agricultural land	43.3	-89.38	2235	97	0	0
JacPinW_OM2H0_O2_FD	Forest soil microbial communities from multiple locations in Canada and USA	Environmental	Terrestrial	Soil	Loam	Forest soil	46.42	-83.37	161471	45388	63	0
MedBloCAOM2_O1_FD	Forest soil microbial communities from multiple locations in Canada and USA	Environmental	Terrestrial	Soil	Loam	Forest soil	38.88	-120.64	98497	16360	21	0
MicForSoilBWC4_M_FD	Forest soil microbial communities from Harvard Forest Long Term Ecological Research (LTER) site in Petersham, MA, for long-term soil warming studies	Environmental	Terrestrial	Soil	Loam	Forest soil	42.4711	-72.1726	9991	1456	1	0
III_Fen_E1_1_FD	Peat permafrost microbial communities from Stordalen Mire near Abisko, Sweden	Environmental	Terrestrial	Soil	Peat	Fen	68.3532	19.0469	331517	117459	4186	207
KBSK5501metaG_FD	Corn, switchgrass and miscanthus rhizosphere microbial communities from Kellogg Biological Station, Michigan, USA	Environmental	Terrestrial	Soil	Loam	Agricultural soil	42.3948	-85.3738	1750781	538369	7267	0
II_Fen_E2_3_FD	Peat permafrost microbial communities from Stordalen Mire near Abisko, Sweden	Environmental	Terrestrial	Soil	Peat	Fen	68.3532	19.0469	195972	55584	1466	1
713E1MmetaG_FD	Peatland microbial communities from Stordalen Mire, Sweden	Environmental	Terrestrial	Soil	Peat	Mire	68.3533	19.0468	188777	52207	952	0
C48D3metaG_FD	Soil microbial communities from West Virginia University Organic Research Farm, Morgantown, WV, United States	Environmental	Terrestrial	Soil	Unclassified	Agricultural land	39.6475	-79.9369	1481048	318779	555	0
44W_NmetaG_FD	Soil microbial communities from hillslopes of Landscape Evolution Observatory, University of Arizona, Oracle, AZ, United States	Environmental	Terrestrial	Soil	Unclassified	Unclassified	32.5789	-110.851	16007	3078	24	0
NitcycUWRG09A312_FD	Soil microbial communities from Arlington Agricultural Research Station in Wisconsin and Kellogg Biological Station in Michigan, replicating the bioenergy cropping systems trials (BCSTs)	Environmental	Terrestrial	Soil	Unclassified	Agricultural land	43.3	-89.38	3689	256	0	0
MetS3V5D_FD	Systems level insights into methane cycling in arid and semi-arid ecosystems	Environmental	Terrestrial	Soil	Unclassified	Desert	33.305	-116.255	60	55	40	0
MC6MC0907MG_FD	Enriched soil aggregate microbial communities from Iowa State university to study microbial drivers of carbon cycling	Environmental	Terrestrial	Soil	Unclassified	Unclassified	42	-93	75212	33484	2347	0
Palsa_T0_1_FD	Peat permafrost microbial communities from Stordalen Mire near Abisko, Sweden	Environmental	Terrestrial	Soil	Peat	Permafrost	68.3532	19.0477	3610120	1221149	31482	1
TexAe_RefH0_O3_FD	Forest soil microbial communities from multiple locations in Canada and USA	Environmental	Terrestrial	Soil	Loam	Forest soil	31.11	-95.15	117116	24203	20	0
Coa_R1_10_FD	Surface soil microbial communities from Centralia Pennsylvania, which are recovering from an underground coalmine fire.	Environmental	Terrestrial	Soil	Unclassified	Unclassified	40.7999	-76.3402	220866	80414	6107	1
LuqExpMetageno34_FD	Tropical forest soil microbial communities from Luquillo Experimental Forest, Puerto Rico	Environmental	Terrestrial	Soil	Loam	Forest soil	18	-65	125679	34155	945	0
SoimicmetaGmgHMC_FD	Soil and rhizosphere microbial communities from Centre INRS-Institut Armand-Frappier, Laval, Canada	Environmental	Terrestrial	Soil	Unclassified	Unclassified	45.54	-73.72	56389	10802	102	0
Lox_Sample_24_FD	Soil microbial communities from Loxahatchee National Wildlife Refuge, Florida, United States	Environmental	Terrestrial	Soil	Wetlands	Unclassified	26.5059	-80.2517	1763199	675807	19589	1
T20D2metaG_FD	Soil microbial communities from West Virginia University Organic Research Farm, Morgantown, WV, United States	Environmental	Terrestrial	Soil	Unclassified	Agricultural land	39.6475	-79.9369	792265	165885	348	0
ER_DNA_195_FD	Soil microbial communities from the East River watershed near Crested Butte, Colorado, United States	Environmental	Terrestrial	Soil	Bulk soil	Meadow	38.9206	-106.949	664471	184423	1273	0
ForSoiNitroNN120_FD	Soil microbial communities from 10 grassland sites in CA, CO, KS, KY, MN, MO, NM, SC, TX, that have been nitrogen fertilized	Environmental	Terrestrial	Soil	Loam	Forest soil	39.2355	-121.284	219	29	0	0
RVTome_11_FD	Soil microbial communities from uranium-contaminated sites across the Upper Colorado River Basin region	Environmental	Terrestrial	Soil	Unclassified	Unclassified	42.9888	-108.399	1608660	496093	6741	0
GWRWT4_12Aug14_FD	Groundwater microbial communities from the Columbia River, Washington, USA	Environmental	Terrestrial	Soil	Sand	Unclassified	46.372	-119.272	15111	3865	3	0
21E_NmetaG_FD	Soil microbial communities from hillslopes of Landscape Evolution Observatory, University of Arizona, Oracle, AZ, United States	Environmental	Terrestrial	Soil	Unclassified	Unclassified	32.5788	-110.851	137999	47577	1861	0
GRESIP089b5f21_FD	Lab enrichment of tropical soil microbial communities from Luquillo Experimental Forest, Puerto Rico	Environmental	Terrestrial	Soil	Unclassified	Forest Soil	18.321	-65.8172	820935	224200	912	0
ForSoiNitroNN628_FD	Soil microbial communities from 10 grassland sites in CA, CO, KS, KY, MN, MO, NM, SC, TX, that have been nitrogen fertilized	Environmental	Terrestrial	Soil	Loam	Grasslands	39.05	-99.1	4882	1032	0	0
GEONDECOMP247_FD	Soil and plant litter microbial communities from temperate forests in California, United States	Environmental	Terrestrial	Plant litter	Unclassified	Unclassified	40.2198	-122.984	73404	22180	138	0
ForSoiNitroNN609_FD	Soil microbial communities from 10 grassland sites in CA, CO, KS, KY, MN, MO, NM, SC, TX, that have been nitrogen fertilized	Environmental	Terrestrial	Soil	Loam	Grasslands	39.05	-99.1	3125	706	1	0
TexAe_OM2H0_M2_FD	Forest soil microbial communities from multiple locations in Canada and USA	Environmental	Terrestrial	Soil	Loam	Forest soil	31.11	-95.15	68634	14078	176	0
LuqExpMetagenom7_FD	Tropical forest soil microbial communities from Luquillo Experimental Forest, Puerto Rico	Environmental	Terrestrial	Soil	Loam	Forest soil	18	-65	51045	15649	111	0
LuqExpMetageno46_FD	Tropical forest soil microbial communities from Luquillo Experimental Forest, Puerto Rico	Environmental	Terrestrial	Soil	Loam	Forest soil	18	-65	26738	8063	86	0
ForSoiNitrNN1097_FD	Soil microbial communities from 10 grassland sites in CA, CO, KS, KY, MN, MO, NM, SC, TX, that have been nitrogen fertilized	Environmental	Terrestrial	Soil	Loam	Grasslands	40.8167	-104.767	4115	1005	0	0
714E215metaG_2_FD	Peatland microbial communities from Stordalen Mire, Sweden	Environmental	Terrestrial	Soil	Peat	Mire	68.3532	19.0466	48333	9568	1	0
IRFST0metaG_FD	Peatland microbial communities from Stordalen Mire, Sweden	Environmental	Terrestrial	Soil	Peat	Mire	68.3533	19.0466	54980	16896	399	0
NitcycUWRG10A310_FD	Soil microbial communities from Arlington Agricultural Research Station in Wisconsin and Kellogg Biological Station in Michigan, replicating the bioenergy cropping systems trials (BCSTs)	Environmental	Terrestrial	Soil	Unclassified	Agricultural land	43.2958	-89.3799	5755	464	0	0
NitcycUWG06A4a10_FD	Soil microbial communities from Arlington Agricultural Research Station in Wisconsin and Kellogg Biological Station in Michigan, replicating the bioenergy cropping systems trials (BCSTs)	Environmental	Terrestrial	Soil	Unclassified	Agricultural land	43.3	-89.38	5351	521	0	0
ForSoiNitroNN397_FD	Soil microbial communities from 10 grassland sites in CA, CO, KS, KY, MN, MO, NM, SC, TX, that have been nitrogen fertilized	Environmental	Terrestrial	Soil	Loam	Forest soil	44.2052	-122.128	28365	8679	17	0
MayberrySE_Catta_2_FD	Natural and restored wetland microbial communities from the San Francisco Bay, California, USA, that impact long-term carbon sequestration	Environmental	Terrestrial	Soil	Wetlands	Unclassified	38.0499	-121.765	102769	29891	63	0
UWRJL141409B4_FD	Soil microbial communities from Arlington Agricultural Research Station in Wisconsin and Kellogg Biological Station in Michigan, replicating the bioenergy cropping systems trials (BCSTs)	Environmental	Terrestrial	Plant litter	Unclassified	Unclassified	43.3	-89.38	256257	66854	2235	2
LuqExpMetageno31_FD	Tropical forest soil microbial communities from Luquillo Experimental Forest, Puerto Rico	Environmental	Terrestrial	Soil	Loam	Forest soil	18	-65	25758	7892	66	0
BlaSpr_A8_OM2_M1_FD	Forest soil microbial communities from multiple locations in Canada and USA	Environmental	Terrestrial	Soil	Loam	Forest soil	49.08	-89.38	180872	59822	193	0
NitcycUWG052A311_FD	Soil microbial communities from Arlington Agricultural Research Station in Wisconsin and Kellogg Biological Station in Michigan, replicating the bioenergy cropping systems trials (BCSTs)	Environmental	Terrestrial	Soil	Unclassified	Agricultural land	43.3	-89.38	8180	434	0	0
RifOxyD2_FD	Soil microbial communities from Rifle, Colorado, USA	Environmental	Terrestrial	Soil	Loam	Unclassified	39.5348	-107.783	156492	60854	2052	1
SF_Rice_25C_80N__FD	Natural and restored wetland microbial communities from the San Francisco Bay, California, USA, that impact long-term carbon sequestration	Environmental	Terrestrial	Soil	Unclassified	Agricultural land	38.1087	-121.653	10017	525	0	0
UWRJS199509C5_FD	Soil microbial communities from Arlington Agricultural Research Station in Wisconsin and Kellogg Biological Station in Michigan, replicating the bioenergy cropping systems trials (BCSTs)	Environmental	Terrestrial	Soil	Unclassified	Agricultural land	43.3	-89.38	53381	8019	7	0
MicForSoSWNH13_M_FD	Forest soil microbial communities from Harvard Forest Long Term Ecological Research (LTER) site in Petersham, MA, for long-term soil warming studies	Environmental	Terrestrial	Soil	Loam	Forest soil	42.533	-72.2095	41018	6920	1	0
NitcycUWRG07A212_FD	Soil microbial communities from Arlington Agricultural Research Station in Wisconsin and Kellogg Biological Station in Michigan, replicating the bioenergy cropping systems trials (BCSTs)	Environmental	Terrestrial	Soil	Unclassified	Agricultural land	43.3	-89.38	5570	644	0	0
LuqExpMetagenom3_FD	Tropical forest soil microbial communities from Luquillo Experimental Forest, Puerto Rico	Environmental	Terrestrial	Soil	Loam	Forest soil	18	-65	36643	10697	157	0
III_Palsa_E3_3_FD	Peat permafrost microbial communities from Stordalen Mire near Abisko, Sweden	Environmental	Terrestrial	Soil	Peat	Permafrost	68.3535	19.0473	863953	296388	5363	3
42E_NmetaG_FD	Soil microbial communities from hillslopes of Landscape Evolution Observatory, University of Arizona, Oracle, AZ, United States	Environmental	Terrestrial	Soil	Unclassified	Unclassified	32.5788	-110.851	20993	6029	6	0
SF_Rice_10C_0N_2_FD	Natural and restored wetland microbial communities from the San Francisco Bay, California, USA, that impact long-term carbon sequestration	Environmental	Terrestrial	Soil	Unclassified	Agricultural land	38.1087	-121.653	33512	6447	1	0
NSE4metagenome_FD	Soil, plant litter and rhizosphere microbial communities from European coniferous forests	Environmental	Terrestrial	Soil	Unclassified	Unclassified	59.9992	10.7901	28802	5480	2	0
DL13A_FD	Soil microbial communities from H.J. Andrews Experimental Forest, Oregon, United States	Environmental	Terrestrial	Soil	Unclassified	Forest Soil	44.23	-122.22	79689	17351	48	0
RifOxyD1_FD	Soil microbial communities from Rifle, Colorado, USA	Environmental	Terrestrial	Soil	Loam	Unclassified	39.5348	-107.783	200269	88196	5035	13
NitcycUWRG01A211_FD	Soil microbial communities from Arlington Agricultural Research Station in Wisconsin and Kellogg Biological Station in Michigan, replicating the bioenergy cropping systems trials (BCSTs)	Environmental	Terrestrial	Soil	Unclassified	Agricultural land	43.2958	-89.3799	12200	2238	0	0
ForSoiNitroNN338_FD	Soil microbial communities from 10 grassland sites in CA, CO, KS, KY, MN, MO, NM, SC, TX, that have been nitrogen fertilized	Environmental	Terrestrial	Soil	Loam	Grasslands	35.913	-79.056	487	60	0	0
SoimicmetaGmgLPB_FD	Soil and rhizosphere microbial communities from Centre INRS-Institut Armand-Frappier, Laval, Canada	Environmental	Terrestrial	Soil	Unclassified	Unclassified	45.54	-73.72	13926	3291	8	0
KBSC73BmetaG_FD	Corn, switchgrass and miscanthus rhizosphere microbial communities from Kellogg Biological Station, Michigan, USA	Environmental	Terrestrial	Soil	Loam	Agricultural soil	42.3948	-85.3738	1748327	487362	3674	2
NR04A_FD	Soil microbial communities from H.J. Andrews Experimental Forest, Oregon, United States	Environmental	Terrestrial	Soil	Unclassified	Forest Soil	44.23	-122.22	57138	12388	14	0
GREbulkMGT000H_FD	Lab enrichment of tropical soil microbial communities from Luquillo Experimental Forest, Puerto Rico	Environmental	Terrestrial	Soil	Unclassified	Forest Soil	18.321	-65.8172	1692831	517890	3419	0
III_Fen_N3_1_FD	Peat permafrost microbial communities from Stordalen Mire near Abisko, Sweden	Environmental	Terrestrial	Soil	Peat	Fen	68.3532	19.0469	328459	116838	3535	6
AutmiccommuBRH23_FD	Deep subsurface microbial communities from Mt. Terri Underground Rock Laboratory, Switzerland, that are autotrophic	Environmental	Terrestrial	Deep subsurface	Clay	Unclassified	47.379	7.1648	192803	82458	6727	0
GraSoiAngelo_145_FD	Grasslands soil microbial communities from the Angelo Coastal Reserve, California, USA	Environmental	Terrestrial	Soil	Unclassified	Grasslands	39.7392	-123.631	781220	281189	6293	0
714S115metaG_FD	Peatland microbial communities from Stordalen Mire, Sweden	Environmental	Terrestrial	Soil	Peat	Mire	68.3532	19.0475	263598	94201	2157	12
CNK30_metaG_FD	Soil microbial communities from Purdue University Martell Research Forest, Indiana, United States	Environmental	Terrestrial	Soil	Unclassified	Forest Soil	40.4449	-87.0297	71545	15163	28	1
LuqExpMetageno78_FD	Tropical forest soil microbial communities from Luquillo Experimental Forest, Puerto Rico	Environmental	Terrestrial	Soil	Loam	Forest soil	18	-65	16247	5395	80	0
ForSoiNitroNN606_FD	Soil microbial communities from 10 grassland sites in CA, CO, KS, KY, MN, MO, NM, SC, TX, that have been nitrogen fertilized	Environmental	Terrestrial	Soil	Loam	Grasslands	39.05	-99.1	6946	1595	0	0
Sandmound_TuleC__FD	Natural and restored wetland microbial communities from the San Francisco Bay, California, USA, that impact long-term carbon sequestration	Environmental	Terrestrial	Soil	Wetlands	Unclassified	38.0007	-121.624	23091	3335	1	0
SalPonF2_A_D1_MG_FD	Salt pond water, soil and salt crust microbial communities from South San Francisco under conditions of wetland restoration.	Environmental	Terrestrial	Soil	Wetlands	Unclassified	37.4971	-122.129	61801	18016	52	0
NGESurdeep092012_7_FD	Arctic peat soil microbial communities from the Barrow Environmental Observatory site, Barrow, Alaska, USA	Environmental	Terrestrial	Soil	Unclassified	Permafrost	71.2999	-156.61	116062	50723	2210	0
SoimicmetaGmgHAC_FD	Soil and rhizosphere microbial communities from Centre INRS-Institut Armand-Frappier, Laval, Canada	Environmental	Terrestrial	Soil	Unclassified	Unclassified	45.54	-73.72	7549	1626	47	0
NitcycUWRG09K412_FD	Soil microbial communities from Arlington Agricultural Research Station in Wisconsin and Kellogg Biological Station in Michigan, replicating the bioenergy cropping systems trials (BCSTs)	Environmental	Terrestrial	Soil	Unclassified	Agricultural land	42.4	-85.37	1168	62	0	0
LuqExpMetageno59_FD	Tropical forest soil microbial communities from Luquillo Experimental Forest, Puerto Rico	Environmental	Terrestrial	Soil	Loam	Forest soil	18	-65	21238	6622	161	0
Subbio11_8B_AprC_FD	Serpentinite rock and fluid microbial communities from Tablelands Ophiolite (Newfoundland), Coast Range Ophiolite (California) and Ligurian Springs (Italy)	Environmental	Terrestrial	Deep subsurface	Unclassified	Unclassified	38.874	-122.439	27737	12119	736	0
CFST0metaG_FD	Peatland microbial communities from Stordalen Mire, Sweden	Environmental	Terrestrial	Soil	Peat	Mire	68.3533	19.0466	145900	44279	645	0
NitcycUWG10A2w11_FD	Soil microbial communities from Arlington Agricultural Research Station in Wisconsin and Kellogg Biological Station in Michigan, replicating the bioenergy cropping systems trials (BCSTs)	Environmental	Terrestrial	Soil	Unclassified	Agricultural land	43.3	-89.38	4871	852	0	0
LuqExpMetagenom9_FD	Tropical forest soil microbial communities from Luquillo Experimental Forest, Puerto Rico	Environmental	Terrestrial	Soil	Loam	Forest soil	18	-65	26747	8573	302	0
II_Bog_N2_2_FD	Peat permafrost microbial communities from Stordalen Mire near Abisko, Sweden	Environmental	Terrestrial	Soil	Peat	Bog	68.3532	19.0477	572112	197248	7021	13
MHFome_FD	Lab enriched peat soil microbial communities from two peatlands near Ithaca, NY, United States	Environmental	Terrestrial	Soil	Peat	Fen	42.3286	-76.4792	625701	157345	1084	0
UWRJS066202C4_FD	Soil microbial communities from Arlington Agricultural Research Station in Wisconsin and Kellogg Biological Station in Michigan, replicating the bioenergy cropping systems trials (BCSTs)	Environmental	Terrestrial	Soil	Unclassified	Agricultural land	43.3	-89.38	168231	33967	153	0
II_Bog_E3_1_FD	Peat permafrost microbial communities from Stordalen Mire near Abisko, Sweden	Environmental	Terrestrial	Soil	Peat	Bog	68.3532	19.0477	400279	127101	3258	21
[truncated: 984 more rows]
